# Supplementary material for: Genes Expressed in Specific Areas of the Human Fetal Cerebral Cortex Display Distinct Patterns of Evolution
Source: PubMed Central journal article supplement (PMC3060818; doi:10.1371/journal.pone.0017753), 2011-03-18
Supplement: pone.0017753.s001.pdf [file pone.0017753.s001.pdf]

## **Supporting Information**

### **Legends to Supplementary Figures and Tables**

#### **Supplementary Figure 1**

##### **Hierarchical clustering of gene expression.**

Genes differentially expressed between PFO vs. PT or 17 vs. 19GW (fold-change threshold was set to 2 for the sake of display clarity), hierarchical clustering by absolute levels of expression through the eight different areas/stages, PFO vs. PT and 17 vs. 19GW cluster together. (Left panel) A and B are two clusters of gene expression patterns across all 8 samples. Clusters A and B are shown enlarged in the middle and right panels.

#### **Supplementary Tables**

##### **Supplementary Table 1:**

##### **Sequence evolution of putative regulatory sequences nearby differentially expressed genes (aCNS).**

Genes differentially expressed between PFO vs. PT or 17GW vs. 19GW among the CNS, haCNS, caCNS, maCNS (Prabhakar et al.2006), the proportion of these genes among CNS are represented in Figure 7A.

PFOvsPT.q, PFOvsPT.p, 17vs19.q, 17vs19.dp: dp and q-values (i.e. multiple testing-adjusted confidence measures) for the considered analysis. d: SAM's moderated t-statistics.

PFOvsPT.FC, 17vs19.FC: Fold change values.

NA: “Not available”. For genes lists: the gene is not in the considered sub-list. For q-values: q-value could not be estimated.

**Supplementary Table 2:**

**Sequence evolution of putative regulatory sequences nearby differentially expressed genes (ARs).**

Genes differentially expressed between PFO vs. PT or 17GW vs. 19GW among the CNS, HAR, CAR, MAR, the proportion of these genes among CNS are represented in Figure 7B. (See legend Supplementary Table 1).

**Supplementary Table 3:**

**TFBS divergence analysis**

First table:

List of genes next to an HAR containing at least one TFBS with turnover at  $FDR < 0.05$ ; C: TFs for these TFBS with  $FDR < 0.05$  and their expression values; q-value and fold-change (PFO vs. PT and 17GW vs. 19 GW) for these genes. In green genes with significant ( $q < 0.01$ ) PFO vs. PT differential expression, in red TFs related to TFBS with PFO vs. PT ( $q < 0.01$ )

Second table:

Same list, but only with genes or TF with PFO vs. PT  $q < 0.01$ , Red TF related to TFBS which are themselves differentially expressed in PT vs. PFO at  $q < 0.01$ ; location of the considered gene and the HAR in which the TFBS are predicted. Some genes appear more than one time if the TFBS are in two different HARs.

**Supplementary Table 4:**

Genes differentially expressed in PFO vs. PT ( $q < 0.01$ ), that are nearby a HAR containing at least one transcription factor (TF) with a significant loss or gain of predicted binding sites in the human lineage ( $FDR < 0.05$ ). The corresponding TFs are in the 2<sup>nd</sup> column, TFs differentially expressed in PFO vs PT are in red.

**Supplementary Table 5:**

**FoxP2 targets among differentially expressed genes.**

Genes differentially expressed (between PFO vs. PT) among the genes differentially or similarly regulated by human and chimpanzee FOXP2 (represented in Figure 7C).

## **Supplementary Methods**

### **3D reconstruction**

*Assembling the picture stack.* The pictures of the frozen block face were manually aligned one at a time with Adobe Photoshop CS (Adobe Systems Inc.®). The picture of the first section was used as background onto which a picture of the adjacent section was superimposed, as a second layer. This “layer 2” was made semi-transparent and aligned using the transform-rotate and transform-scale commands to correct misalignments due to camera instability or block removal for the night. This allowed a reliable overlaying of the consecutive pictures. When the alignment was optimal, “layer 2” was made opaque again and the same procedure was applied to the next picture, and so on for the whole set of pictures. Each aligned layer was saved afterwards in an individual jpeg file numbered according to its position along the z-axis. This series of jpeg images corresponds to the image stack needed to perform the 3D reconstruction of the brain.

*3D Model.* 3D-doctor (Able Software Corp.®) was used for the rendering of the 3D model. The stack of images was loaded in the program and the true voxel size and the units ( $\mu\text{m}$ ) were entered in the calibration menu. The image true pixel size in  $\mu\text{m}$  (x and y voxel value), was measured in Photoshop® by taking the picture of a scale bar graduated at intervals of 0.1 mm. The z value of the voxel corresponded to the slide thickness set on the microtome when cutting the sample.

The first step of the model construction was to outline the outer limits of the brain using free hand drawing to get its general shape. As 3D-doctor allowed adding slices to an existing stack, it was possible to start drawing from a restricted number of pictures, add the next slices progressively and check while drawing the global quality of the alignment for any drifting occurring in the stack due to human alignment errors. Transition from one section to the next was smooth. Only a very limited number of sections had to be realigned before the stack was judged optimal.

Once the brain boundaries were traced on all images, these boundaries were smoothed using the “boundary process-smooth boundary” command, reducing the distance between nodes to 10, to reduce computer processor time when generating the surface model. The available surface-rendering modes were tested; “complex rendering” gave the best results and was therefore used in all subsequent steps using the most detailed parameters ( $x=1$ ,  $y=1$ ,  $z=1$ ). The generated surface model was smoothed three times using the “tools-smooth surface” command to reduce the "steps" generated by this mode of reconstruction and to give a more natural-looking appearance to the brain structures.

*Selection of the target areas on the 17GW model.* We wanted to compare the gene expression pattern of two cortical areas – Broca and Wernicke areas – which in the adult brain would be involved in speech to determine if some cortical asymmetry was already present in our foetal brains. Since most major cortical grooves start to develop during the third trimester, we decided to draw on our 17GW model a wide frontal area that in adult brain would encompass without doubts PFO and PT, encompassing Broca and Wernicke areas. These areas were drawn first on the left side of the model.

Once the choice of limits of these areas was firm, we reported them exactly on the right side of the 17GW brain.

In order to project exactly the same areas onto the right hemisphere, we generated two half models of the 17GW brain using the edit-boundary process-split object command. The left side of the brain including its chosen target areas was then flipped left to right in the model viewer using the tools-mirror model command and moved to merge as exactly as possible with the right side model. The target areas were then drawn on the right side model to match as closely as possible their left counterparts.

*Transferring the target areas to the 19GW model.* We first tried to match the 17GW model inside the 19GW model to transfer the target area for one model to the second, as we had done to transfer the left areas to the right hemisphere in the 17GW model. We observed that the size and shape of the hemispheres was too different between these models to allow unambiguous areas transfer between them on such a visual-only basis. We therefore used the 3D doctor registration function to transform the shape of our 17GW model into the shape and size of our 19GW model, creating a 17GW<sup>p19</sup> model, which then could truly be matched to the actual 19GW model.

The registration command applies only to the pictures of the stack of origin. It will stretch the voxels according to the demand imposed by the new reference points, modifies the angle of slicing and reslices to match the angle and number of slices of the stack of destination. This command does not apply to the hand drawn boundaries. Yet we needed our chosen areas to go through the same transformation as the whole brain. To solve this issue, we exported for each image of our origin stack the pictures of the window showing the frozen block image and its hand-drawn boundaries, creating a new stack, identical to the first one but with the hand drawn boundaries

integrated into the frozen block image. In Photoshop® the selected cortical area boundaries were then filled with colour so they would be easier to recognize after registration reslicing. Registration requires the user to define at least 4 “identical” reference points on the two models. We tried different reference points and various numbers of them. The best result was obtained using 6 reference points placed respectively at the tip of the frontal, temporal and occipital lobes of the two hemispheres.

Once registration was done, the boundaries of the brain and of the four selected cortical areas were drawn on the new 17GW<sup>p19</sup> stack. These boundaries were then saved and imported to their corresponding frozen block picture in the 19WG stack. Since transformation from the 17GW model to the 19GW model was not a perfect point to point morphing, some area boundaries had to be slightly rotated or shifted to follow more closely the actual curves of the 19GW brain. Once all areas boundaries were drawn on the 19GW model, the 17GW<sup>p19</sup> model was inserted inside the 19GW model to check the area match.

### **Dissection of the 3D-selected cortical areas on the frozen sections**

Pictures of the window showing the frozen block image corresponding to the areas to be actually dissected and its hand drawn boundaries were exported to Photoshop. The area boundaries were filled with bright printer friendly colour for easier visual identification. The images were flipped horizontally so they could be placed under their respective frozen section. The left side of the brain was marked on each picture to avoid left-right confusion during dissection. The images were printed in colour to the exact size of their frozen section counterpart. This was checked with the cresyl violet staining of adjacent sections. The colour pictures were put inside a small

RNAse-out treated plastic cover and placed under their respective frozen section for dissection. The slides were dissected on a bed of carboice to avoid RNA degradation. Dissection was done without magnification, with a precision blade, inside the chamber of the cryotome. The dissected material was recovered in seperate RNAse-free eppendorfs placed on carboice. RNA extraction was performed immediately after dissection of all sections was completed, using the RNeasy extraction kit.



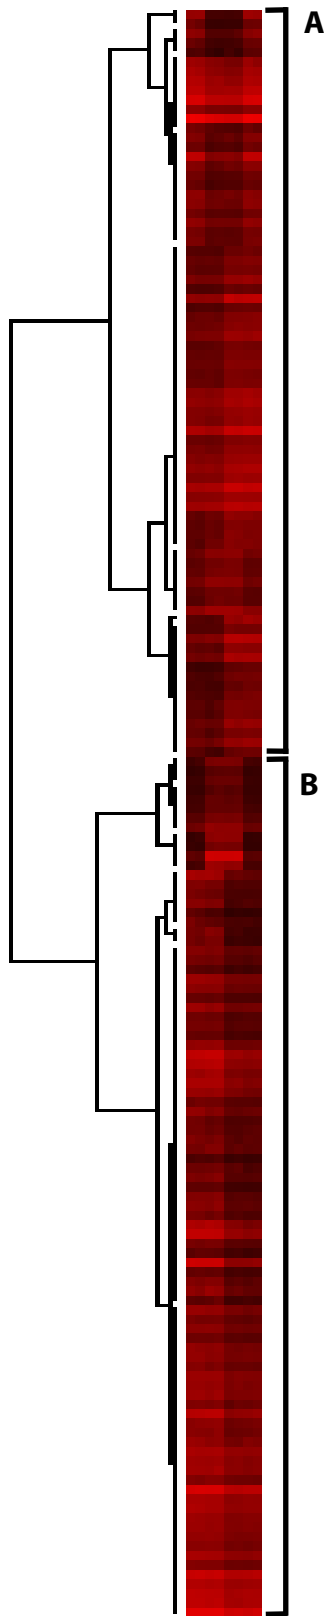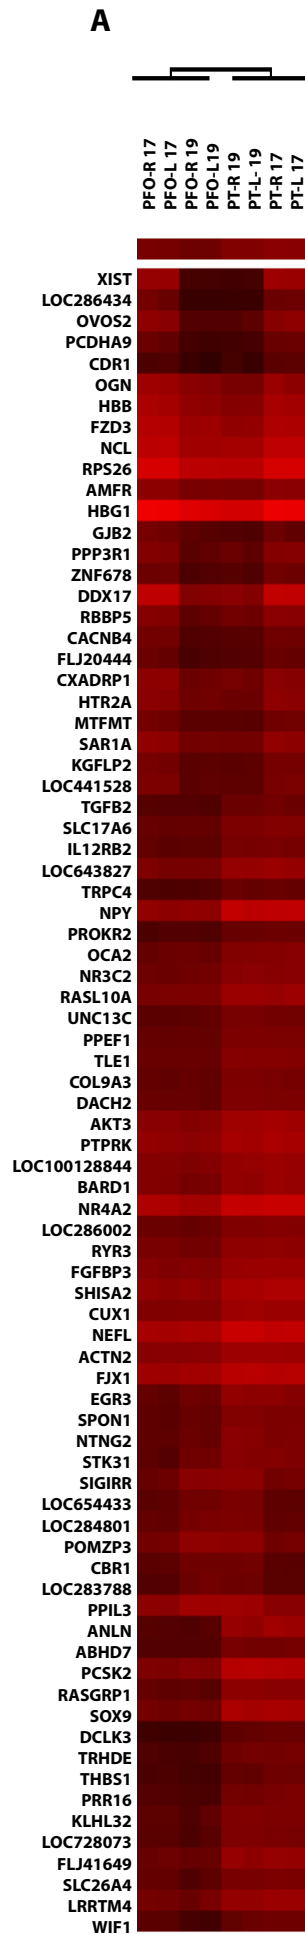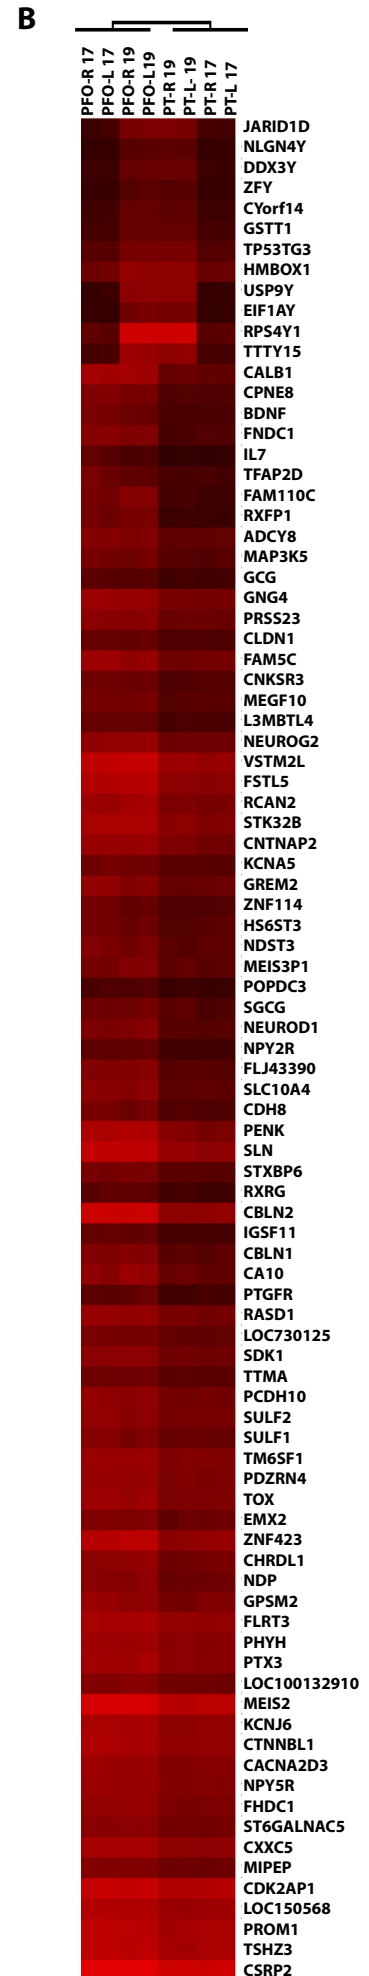

Lambert et al. suppl Fig 1

## Supplementary table 1

### haCNS PFOvsPT q<0.01

| <b>SYMBOL</b> | <b>PFOvsPT.d</b> | <b>PFOvsPT.FC</b> | <b>PFOvsPT.q</b> | <b>haCNS</b> | <b>caCNS</b> | <b>maCNS</b> |
|---------------|------------------|-------------------|------------------|--------------|--------------|--------------|
| CA10          | -6.12            | 5.712212733       | 0                | CA10         | CA10         | CA10         |
| CDH8          | -6.06468643      | 4.185181997       | 0                | CDH8         | CDH8         | CDH8         |
| TFAP2D        | -3.50782293      | 3.658017759       | 0                | TFAP2D       | NA           | TFAP2D       |
| CNTNAP2       | -5.12221366      | 3.340737607       | 0                | CNTNAP2      | CNTNAP2      | CNTNAP2      |
| STXBP6        | -7.55969727      | 3.299394519       | 0                | STXBP6       | NA           | STXBP6       |
| MEIS2         | -8.05642148      | 3.203435352       | 0                | MEIS2        | NA           | MEIS2        |
| TOX           | -6.24702549      | 3.160502065       | 0                | TOX          | TOX          | TOX          |
| IGSF11        | -7.55618738      | 3.097316213       | 0                | IGSF11       | IGSF11       | IGSF11       |
| PCDH10        | -5.84345127      | 2.908355915       | 0                | PCDH10       | PCDH10       | PCDH10       |
| CHRD1         | -4.52809552      | 2.883850704       | 0                | CHRD1        | NA           | CHRD1        |
| L3MBTL4       | -7.31353178      | 2.854053804       | 0                | L3MBTL4      | NA           | NA           |
| PDZRN4        | -5.44764863      | 2.63707924        | 0                | PDZRN4       | PDZRN4       | PDZRN4       |
| BMP2          | -4.21371593      | 2.614685809       | 0                | BMP2         | NA           | BMP2         |
| CTNBL1        | -5.1701204       | 2.605088071       | 0                | CTNBL1       | NA           | NA           |
| HS6ST3        | -3.6617101       | 2.521555404       | 0                | HS6ST3       | HS6ST3       | HS6ST3       |
| PART1         | -4.64566281      | 2.46597251        | 0                | PART1        | PART1        | PART1        |
| EMX2          | -3.67376004      | 2.379665984       | 0                | EMX2         | NA           | EMX2         |
| PPAPDC1A      | -5.09062142      | 2.375287236       | 0                | PPAPDC1A     | NA           | NA           |
| CACNA2D3      | -5.01836394      | 2.373116161       | 0                | CACNA2D3     | CACNA2D3     | CACNA2D3     |
| CSRP2         | -5.78367684      | 2.305385047       | 0                | CSRP2        | NA           | NA           |
| ANKRD32       | -5.24414946      | 2.29550366        | 0                | ANKRD32      | NA           | ANKRD32      |
| PTER          | -3.93798799      | 2.213952941       | 0                | PTER         | NA           | PTER         |
| LMO4          | -5.43330418      | 2.097623295       | 0                | LMO4         | LMO4         | LMO4         |
| CNTN4         | -4.29563654      | 2.053456928       | 0                | CNTN4        | CNTN4        | CNTN4        |
| RPRM          | -3.03115814      | 2.032294178       | 0                | RPRM         | NA           | NA           |
| MARCH3        | -5.56101305      | 1.984234907       | 0                | MARCH3       | MARCH3       | NA           |
| DERA          | -3.2478245       | 1.903953655       | 0                | DERA         | DERA         | DERA         |
| ASTN2         | -3.537837        | 1.845172203       | 0                | ASTN2        | ASTN2        | ASTN2        |
| GBE1          | -3.79150602      | 1.82357854        | 0                | GBE1         | GBE1         | GBE1         |
| CDCA7L        | -3.20491701      | 1.821544626       | 0                | CDCA7L       | CDCA7L       | NA           |
| HS3ST5        | -2.68310547      | 1.772104321       | 0                | HS3ST5       | NA           | HS3ST5       |
| ADAMTS16      | -2.36220106      | 1.760054514       | 0                | ADAMTS16     | NA           | ADAMTS16     |
| EGLN3         | -2.99677255      | 1.721010124       | 0                | EGLN3        | NA           | NA           |
| PTPRT         | -2.74804604      | 1.717870851       | 0                | PTPRT        | PTPRT        | PTPRT        |
| ACCN1         | -2.63076477      | 1.679795978       | 0                | ACCN1        | ACCN1        | ACCN1        |
| MEGF11        | -2.95386633      | 1.677663997       | 0                | MEGF11       | NA           | NA           |
| GLIS3         | -2.10301732      | 1.664953031       | 0.1132952        | GLIS3        | GLIS3        | GLIS3        |
| POU6F2        | -2.68054389      | 1.636633705       | 0                | POU6F2       | NA           | POU6F2       |
| LYPD1         | -2.40434003      | 1.635473385       | 0                | LYPD1        | NA           | NA           |
| CNTN6         | -2.8124791       | 1.62508137        | 0                | CNTN6        | CNTN6        | CNTN6        |
| LMO3          | -2.44233444      | 1.621965          | 0                | LMO3         | LMO3         | LMO3         |
| OLFM3         | -2.34271783      | 1.609927878       | 0                | OLFM3        | OLFM3        | NA           |
| POU3F2        | -2.94748566      | 1.608230126       | 0                | POU3F2       | POU3F2       | POU3F2       |
| NFIA          | -2.02490921      | 1.547560662       | 0.1132952        | NFIA         | NFIA         | NFIA         |
| EPHA4         | -2.32887211      | 1.521442732       | 0                | EPHA4        | EPHA4        | EPHA4        |
| PCDH18        | -2.4106968       | 1.507983221       | 0                | PCDH18       | PCDH18       | PCDH18       |
| ELAVL2        | -2.00023103      | 1.499451152       | 0.1132952        | ELAVL2       | ELAVL2       | ELAVL2       |
| POU3F3        | -2.37286138      | 1.478080999       | 0                | POU3F3       | NA           | POU3F3       |

|          |             |             |           |          |        |          |
|----------|-------------|-------------|-----------|----------|--------|----------|
| LRRTM1   | -1.74257338 | 1.476807726 | 0.5692172 | LRRTM1   | NA     | LRRTM1   |
| PARP8    | -1.89900276 | 1.453057443 | 0.1920624 | PARP8    | NA     | PARP8    |
| LDB2     | -2.89311943 | 1.4399603   | 0         | LDB2     | NA     | LDB2     |
| HS3ST1   | -2.20065986 | 1.422808221 | 0         | HS3ST1   | HS3ST1 | HS3ST1   |
| SUPT3H   | -1.88285687 | 1.410333462 | 0.1920624 | SUPT3H   | NA     | SUPT3H   |
| FAM19A5  | -2.25379138 | 1.364349186 | 0         | FAM19A5  | NA     | NA       |
| SLITRK1  | -2.3569568  | 1.363953962 | 0         | SLITRK1  | NA     | SLITRK1  |
| ROBO1    | -2.1733223  | 1.360443688 | 0         | ROBO1    | ROBO1  | ROBO1    |
| DUSP6    | -1.66485337 | 1.342443608 | 0.5692172 | DUSP6    | DUSP6  | DUSP6    |
| TNFRSF21 | -2.27712882 | 1.337971486 | 0         | TNFRSF21 | NA     | TNFRSF21 |
| GRIK2    | -2.10003409 | 1.327840632 | 0.1132952 | GRIK2    | NA     | GRIK2    |
| AADAT    | -2.50286153 | 1.324581374 | 0         | AADAT    | NA     | AADAT    |
| NMNAT3   | -1.75681692 | 1.320962511 | 0.5692172 | NMNAT3   | NA     | NA       |
| ZBTB20   | -2.21439732 | 1.320427888 | 0         | ZBTB20   | ZBTB20 | ZBTB20   |
| DIAPH3   | -1.69113303 | 1.316907999 | 0.5692172 | DIAPH3   | DIAPH3 | DIAPH3   |
| LPHN3    | -1.93568195 | 1.287259152 | 0.1920624 | LPHN3    | LPHN3  | LPHN3    |
| TBR1     | -1.78527877 | 1.281547876 | 0.5692172 | TBR1     | NA     | TBR1     |
| PITPNC1  | -1.92418927 | 1.28031768  | 0.1920624 | PITPNC1  | NA     | NA       |
| CDH22    | -1.64073284 | 1.269176176 | 0.8841996 | CDH22    | NA     | NA       |
| CDH11    | -1.68075954 | 1.267706284 | 0.5692172 | CDH11    | NA     | CDH11    |
| XKR4     | -1.6124775  | 1.258232866 | 0.8841996 | XKR4     | NA     | NA       |
| DCC      | -1.54680033 | 1.256419694 | 0.8841996 | DCC      | DCC    | DCC      |
| ID4      | -1.71418298 | 1.249410143 | 0.5692172 | ID4      | NA     | ID4      |
| SYT9     | -1.71749433 | 1.248318572 | 0.5692172 | SYT9     | NA     | NA       |
| CSMD3    | -1.53036727 | 1.234721195 | 0.8841996 | CSMD3    | NA     | CSMD3    |
| NRXN3    | -1.67797848 | 1.232510319 | 0.5692172 | NRXN3    | NA     | NRXN3    |
| CSMD1    | -1.6330538  | 1.202959298 | 0.8841996 | CSMD1    | CSMD1  | CSMD1    |
| PTPRD    | 1.601348957 | 0.823782065 | 0.8841996 | PTPRD    | PTPRD  | PTPRD    |
| RIMS4    | 1.571240855 | 0.806598496 | 0.8841996 | RIMS4    | NA     | NA       |
| EFNA5    | 1.623838337 | 0.805562936 | 0.8841996 | EFNA5    | EFNA5  | EFNA5    |
| XYLT1    | 1.922205135 | 0.80021924  | 0.1920624 | XYLT1    | NA     | XYLT1    |
| CDC73    | 1.56862806  | 0.79791535  | 0.8841996 | CDC73    | NA     | NA       |
| CLYBL    | 1.540808211 | 0.789655223 | 0.8841996 | CLYBL    | NA     | CLYBL    |
| NR2F2    | 1.681058537 | 0.787077506 | 0.5692172 | NR2F2    | NR2F2  | NR2F2    |
| LRRC4C   | 1.772317163 | 0.783808549 | 0.5692172 | LRRC4C   | LRRC4C | LRRC4C   |
| MITF     | 1.626351977 | 0.782694496 | 0.8841996 | MITF     | NA     | MITF     |
| ZNF365   | 1.608012079 | 0.782204854 | 0.8841996 | ZNF365   | ZNF365 | ZNF365   |
| HNMT     | 1.641286706 | 0.779961652 | 0.8841996 | HNMT     | NA     | HNMT     |
| CNTNAP5  | 1.867266525 | 0.778953903 | 0.1920624 | CNTNAP5  | NA     | CNTNAP5  |
| FANCL    | 1.958283069 | 0.776417081 | 0.1920624 | FANCL    | FANCL  | FANCL    |
| SMAD7    | 1.582277207 | 0.772544417 | 0.8841996 | SMAD7    | NA     | NA       |
| TCF4     | 1.72942339  | 0.770627215 | 0.5692172 | TCF4     | TCF4   | TCF4     |
| C2orf3   | 1.841798128 | 0.755857562 | 0.1920624 | C2orf3   | NA     | NA       |
| GRIA3    | 1.84845098  | 0.749806617 | 0.1920624 | GRIA3    | GRIA3  | GRIA3    |
| ACVR1    | 1.901681292 | 0.74909317  | 0.1920624 | ACVR1    | NA     | ACVR1    |
| LMO1     | 1.553677926 | 0.745715017 | 0.8841996 | LMO1     | NA     | NA       |
| CXCR4    | 2.472439403 | 0.739130617 | 0         | CXCR4    | NA     | CXCR4    |
| PTPRG    | 1.702970376 | 0.737949782 | 0.5692172 | PTPRG    | PTPRG  | PTPRG    |
| SNX16    | 2.022273678 | 0.735425143 | 0.1132952 | SNX16    | SNX16  | SNX16    |
| LRRC7    | 2.138431829 | 0.730778933 | 0.1132952 | LRRC7    | NA     | LRRC7    |
| ZNF618   | 2.4840875   | 0.730109049 | 0         | ZNF618   | NA     | NA       |
| CTNNA2   | 2.349801056 | 0.726774235 | 0         | CTNNA2   | CTNNA2 | CTNNA2   |
| EDIL3    | 2.471871838 | 0.714879738 | 0         | EDIL3    | EDIL3  | EDIL3    |
| PBX3     | 2.630409665 | 0.710301985 | 0         | PBX3     | NA     | PBX3     |
| CDH13    | 1.576661194 | 0.710124456 | 0.8841996 | CDH13    | CDH13  | CDH13    |
| NLGN1    | 1.972999378 | 0.70393173  | 0.1920624 | NLGN1    | NLGN1  | NLGN1    |
| KIAA1797 | 2.297017196 | 0.701044018 | 0         | KIAA1797 | NA     | KIAA1797 |

|           |             |             |           |           |          |          |
|-----------|-------------|-------------|-----------|-----------|----------|----------|
| PPARGC1A  | 2.525981736 | 0.696051571 | 0         | PPARGC1A  | PPARGC1A | PPARGC1A |
| DYRK2     | 2.330251518 | 0.686718348 | 0         | DYRK2     | NA       | NA       |
| GRIK1     | 2.095029121 | 0.683951491 | 0.1132952 | GRIK1     | GRIK1    | GRIK1    |
| HAS2      | 2.05747991  | 0.683146203 | 0.1132952 | HAS2      | NA       | NA       |
| DOK5      | 3.468938151 | 0.682774508 | 0         | DOK5      | DOK5     | DOK5     |
| EFNB2     | 2.068676182 | 0.67820706  | 0.1132952 | EFNB2     | EFNB2    | EFNB2    |
| TGFBR1    | 2.419917641 | 0.652633398 | 0         | TGFBR1    | NA       | NA       |
| EPHA7     | 2.325415831 | 0.643391453 | 0         | EPHA7     | EPHA7    | EPHA7    |
| ITPR1     | 3.650092417 | 0.639788798 | 0         | ITPR1     | NA       | ITPR1    |
| DPP10     | 2.354621865 | 0.6215833   | 0         | DPP10     | DPP10    | DPP10    |
| LOC283392 | 3.210919415 | 0.587372463 | 0         | LOC283392 | NA       | NA       |
| MCTP1     | 3.610437125 | 0.580458414 | 0         | MCTP1     | NA       | MCTP1    |
| BCL11A    | 2.887541535 | 0.577424878 | 0         | BCL11A    | BCL11A   | BCL11A   |
| FST       | 2.456987371 | 0.573029999 | 0         | FST       | FST      | FST      |
| SNTG1     | 4.143762175 | 0.571025733 | 0         | SNTG1     | NA       | NA       |
| OPCML     | 3.730784512 | 0.528980935 | 0         | OPCML     | OPCML    | OPCML    |
| PCDH7     | 4.99435407  | 0.528261246 | 0         | PCDH7     | PCDH7    | PCDH7    |
| CDH9      | 3.347253803 | 0.502386394 | 0         | CDH9      | CDH9     | CDH9     |
| NR2F1     | 4.533384717 | 0.490489804 | 0         | NR2F1     | NR2F1    | NR2F1    |
| FAM19A1   | 4.348552767 | 0.488005419 | 0         | FAM19A1   | FAM19A1  | FAM19A1  |
| NCAM2     | 3.86902789  | 0.486966988 | 0         | NCAM2     | NCAM2    | NA       |
| SORCS1    | 4.398843879 | 0.484518816 | 0         | SORCS1    | NA       | SORCS1   |
| LPHN2     | 4.227025654 | 0.470334365 | 0         | LPHN2     | LPHN2    | LPHN2    |
| SORCS3    | 3.775183207 | 0.469115015 | 0         | SORCS3    | SORCS3   | SORCS3   |
| ROBO2     | 5.389565456 | 0.464744626 | 0         | ROBO2     | ROBO2    | ROBO2    |
| NFE2L3    | 3.290581592 | 0.457712017 | 0         | NFE2L3    | NA       | NA       |
| PTPRK     | 4.763210281 | 0.397753704 | 0         | PTPRK     | NA       | PTPRK    |
| FJX1      | 5.572196893 | 0.396179661 | 0         | FJX1      | NA       | NA       |
| BARD1     | 3.883937603 | 0.394424527 | 0         | BARD1     | NA       | BARD1    |
| PCDH9     | 5.611957099 | 0.383387329 | 0         | PCDH9     | PCDH9    | PCDH9    |
| NR3C2     | 6.294811103 | 0.354365206 | 0         | NR3C2     | NA       | NR3C2    |
| LRRTM4    | 5.923967514 | 0.235613006 | 0         | LRRTM4    | LRRTM4   | LRRTM4   |
| TRHDE     | 7.463230607 | 0.22727706  | 0         | TRHDE     | TRHDE    | TRHDE    |
| SOX9      | 12.91514    | 0.116417689 | 0         | SOX9      | SOX9     | SOX9     |

### ha-caCNS PFOvsPT q<0.01

| SYMBOL   | PFOvsPT.d   | PFOvsPT.FC  | PFOvsPT.q | haCNS    | caCNS | maCNS    |
|----------|-------------|-------------|-----------|----------|-------|----------|
| TFAP2D   | -3.50782293 | 3.658017759 | 0         | TFAP2D   | NA    | TFAP2D   |
| STXBP6   | -7.55969727 | 3.299394519 | 0         | STXBP6   | NA    | STXBP6   |
| MEIS2    | -8.05642148 | 3.203435352 | 0         | MEIS2    | NA    | MEIS2    |
| CHRD1    | -4.52809552 | 2.883850704 | 0         | CHRD1    | NA    | CHRD1    |
| L3MBTL4  | -7.31353178 | 2.854053804 | 0         | L3MBTL4  | NA    | NA       |
| BMP2     | -4.21371593 | 2.614685809 | 0         | BMP2     | NA    | BMP2     |
| CTNBL1   | -5.1701204  | 2.605088071 | 0         | CTNBL1   | NA    | NA       |
| EMX2     | -3.67376004 | 2.379665984 | 0         | EMX2     | NA    | EMX2     |
| PPAPDC1A | -5.09062142 | 2.375287236 | 0         | PPAPDC1A | NA    | NA       |
| CSRP2    | -5.78367684 | 2.305385047 | 0         | CSRP2    | NA    | NA       |
| ANKRD32  | -5.24414946 | 2.29550366  | 0         | ANKRD32  | NA    | ANKRD32  |
| PTER     | -3.93798799 | 2.213952941 | 0         | PTER     | NA    | PTER     |
| RPRM     | -3.03115814 | 2.032294178 | 0         | RPRM     | NA    | NA       |
| HS3ST5   | -2.68310547 | 1.772104321 | 0         | HS3ST5   | NA    | HS3ST5   |
| ADAMTS16 | -2.36220106 | 1.760054514 | 0         | ADAMTS16 | NA    | ADAMTS16 |
| EGLN3    | -2.99677255 | 1.721010124 | 0         | EGLN3    | NA    | NA       |
| MEGF11   | -2.95386633 | 1.677663997 | 0         | MEGF11   | NA    | NA       |
| POU6F2   | -2.68054389 | 1.636633705 | 0         | POU6F2   | NA    | POU6F2   |

|           |             |             |           |           |    |          |
|-----------|-------------|-------------|-----------|-----------|----|----------|
| LYPD1     | -2.40434003 | 1.635473385 | 0         | LYPD1     | NA | NA       |
| POU3F3    | -2.37286138 | 1.478080999 | 0         | POU3F3    | NA | POU3F3   |
| LRRTM1    | -1.74257338 | 1.476807726 | 0.5692172 | LRRTM1    | NA | LRRTM1   |
| PARP8     | -1.89900276 | 1.453057443 | 0.1920624 | PARP8     | NA | PARP8    |
| LDB2      | -2.89311943 | 1.4399603   | 0         | LDB2      | NA | LDB2     |
| SUPT3H    | -1.88285687 | 1.410333462 | 0.1920624 | SUPT3H    | NA | SUPT3H   |
| FAM19A5   | -2.25379138 | 1.364349186 | 0         | FAM19A5   | NA | NA       |
| SLITRK1   | -2.3569568  | 1.363953962 | 0         | SLITRK1   | NA | SLITRK1  |
| TNFRSF21  | -2.27712882 | 1.337971486 | 0         | TNFRSF21  | NA | TNFRSF21 |
| GRIK2     | -2.10003409 | 1.327840632 | 0.1132952 | GRIK2     | NA | GRIK2    |
| AADAT     | -2.50286153 | 1.324581374 | 0         | AADAT     | NA | AADAT    |
| NMNAT3    | -1.75681692 | 1.320962511 | 0.5692172 | NMNAT3    | NA | NA       |
| TBR1      | -1.78527877 | 1.281547876 | 0.5692172 | TBR1      | NA | TBR1     |
| PITPNC1   | -1.92418927 | 1.28031768  | 0.1920624 | PITPNC1   | NA | NA       |
| CDH22     | -1.64073284 | 1.269176176 | 0.8841996 | CDH22     | NA | NA       |
| CDH11     | -1.68075954 | 1.267706284 | 0.5692172 | CDH11     | NA | CDH11    |
| XKR4      | -1.6124775  | 1.258232866 | 0.8841996 | XKR4      | NA | NA       |
| ID4       | -1.71418298 | 1.249410143 | 0.5692172 | ID4       | NA | ID4      |
| SYT9      | -1.71749433 | 1.248318572 | 0.5692172 | SYT9      | NA | NA       |
| CSMD3     | -1.53036727 | 1.234721195 | 0.8841996 | CSMD3     | NA | CSMD3    |
| NRXN3     | -1.67797848 | 1.232510319 | 0.5692172 | NRXN3     | NA | NRXN3    |
| RIMS4     | 1.571240855 | 0.806598496 | 0.8841996 | RIMS4     | NA | NA       |
| XYLT1     | 1.922205135 | 0.80021924  | 0.1920624 | XYLT1     | NA | XYLT1    |
| CDC73     | 1.56862806  | 0.79791535  | 0.8841996 | CDC73     | NA | NA       |
| CLYBL     | 1.540808211 | 0.789655223 | 0.8841996 | CLYBL     | NA | CLYBL    |
| MITF      | 1.626351977 | 0.782694496 | 0.8841996 | MITF      | NA | MITF     |
| HNMT      | 1.641286706 | 0.779961652 | 0.8841996 | HNMT      | NA | HNMT     |
| CNTNAP5   | 1.867266525 | 0.778953903 | 0.1920624 | CNTNAP5   | NA | CNTNAP5  |
| SMAD7     | 1.582277207 | 0.772544417 | 0.8841996 | SMAD7     | NA | NA       |
| C2orf3    | 1.841798128 | 0.755857562 | 0.1920624 | C2orf3    | NA | NA       |
| ACVR1     | 1.901681292 | 0.74909317  | 0.1920624 | ACVR1     | NA | ACVR1    |
| LMO1      | 1.553677926 | 0.745715017 | 0.8841996 | LMO1      | NA | NA       |
| CXCR4     | 2.472439403 | 0.739130617 | 0         | CXCR4     | NA | CXCR4    |
| LRRC7     | 2.138431829 | 0.730778933 | 0.1132952 | LRRC7     | NA | LRRC7    |
| ZNF618    | 2.4840875   | 0.730109049 | 0         | ZNF618    | NA | NA       |
| PBX3      | 2.630409665 | 0.710301985 | 0         | PBX3      | NA | PBX3     |
| KIAA1797  | 2.297017196 | 0.701044018 | 0         | KIAA1797  | NA | KIAA1797 |
| DYRK2     | 2.330251518 | 0.686718348 | 0         | DYRK2     | NA | NA       |
| HAS2      | 2.05747991  | 0.683146203 | 0.1132952 | HAS2      | NA | NA       |
| TGFBR1    | 2.419917641 | 0.652633398 | 0         | TGFBR1    | NA | NA       |
| ITPR1     | 3.650092417 | 0.639788798 | 0         | ITPR1     | NA | ITPR1    |
| LOC283392 | 3.210919415 | 0.587372463 | 0         | LOC283392 | NA | NA       |
| MCTP1     | 3.610437125 | 0.580458414 | 0         | MCTP1     | NA | MCTP1    |
| SNTG1     | 4.143762175 | 0.571025733 | 0         | SNTG1     | NA | NA       |
| SORCS1    | 4.398843879 | 0.484518816 | 0         | SORCS1    | NA | SORCS1   |
| NFE2L3    | 3.290581592 | 0.457712017 | 0         | NFE2L3    | NA | NA       |
| PTPRK     | 4.763210281 | 0.397753704 | 0         | PTPRK     | NA | PTPRK    |
| FJX1      | 5.572196893 | 0.396179661 | 0         | FJX1      | NA | NA       |
| BARD1     | 3.883937603 | 0.394424527 | 0         | BARD1     | NA | BARD1    |
| NR3C2     | 6.294811103 | 0.354365206 | 0         | NR3C2     | NA | NR3C2    |

### haCNS only PFOvsPT q<0.01

| SYMBOL | PFOvsPT.d | PFOvsPT.FC | PFOvsPT.q | haCNS | caCNS | maCNS |
|--------|-----------|------------|-----------|-------|-------|-------|
|--------|-----------|------------|-----------|-------|-------|-------|

|           |             |             |           |           |    |    |
|-----------|-------------|-------------|-----------|-----------|----|----|
| L3MBTL4   | -7.31353178 | 2.854053804 | 0         | L3MBTL4   | NA | NA |
| CTNNBL1   | -5.1701204  | 2.605088071 | 0         | CTNNBL1   | NA | NA |
| PPAPDC1A  | -5.09062142 | 2.375287236 | 0         | PPAPDC1A  | NA | NA |
| CSRP2     | -5.78367684 | 2.305385047 | 0         | CSRP2     | NA | NA |
| RPRM      | -3.03115814 | 2.032294178 | 0         | RPRM      | NA | NA |
| EGLN3     | -2.99677255 | 1.721010124 | 0         | EGLN3     | NA | NA |
| MEGF11    | -2.95386633 | 1.677663997 | 0         | MEGF11    | NA | NA |
| LYPD1     | -2.40434003 | 1.635473385 | 0         | LYPD1     | NA | NA |
| FAM19A5   | -2.25379138 | 1.364349186 | 0         | FAM19A5   | NA | NA |
| NMNAT3    | -1.75681692 | 1.320962511 | 0.5692172 | NMNAT3    | NA | NA |
| PITPNC1   | -1.92418927 | 1.28031768  | 0.1920624 | PITPNC1   | NA | NA |
| CDH22     | -1.64073284 | 1.269176176 | 0.8841996 | CDH22     | NA | NA |
| XKR4      | -1.6124775  | 1.258232866 | 0.8841996 | XKR4      | NA | NA |
| SYT9      | -1.71749433 | 1.248318572 | 0.5692172 | SYT9      | NA | NA |
| RIMS4     | 1.571240855 | 0.806598496 | 0.8841996 | RIMS4     | NA | NA |
| CDC73     | 1.56862806  | 0.79791535  | 0.8841996 | CDC73     | NA | NA |
| SMAD7     | 1.582277207 | 0.772544417 | 0.8841996 | SMAD7     | NA | NA |
| C2orf3    | 1.841798128 | 0.755857562 | 0.1920624 | C2orf3    | NA | NA |
| LMO1      | 1.553677926 | 0.745715017 | 0.8841996 | LMO1      | NA | NA |
| ZNF618    | 2.4840875   | 0.730109049 | 0         | ZNF618    | NA | NA |
| DYRK2     | 2.330251518 | 0.686718348 | 0         | DYRK2     | NA | NA |
| HAS2      | 2.05747991  | 0.683146203 | 0.1132952 | HAS2      | NA | NA |
| TGFBR1    | 2.419917641 | 0.652633398 | 0         | TGFBR1    | NA | NA |
| LOC283392 | 3.210919415 | 0.587372463 | 0         | LOC283392 | NA | NA |
| SNTG1     | 4.143762175 | 0.571025733 | 0         | SNTG1     | NA | NA |
| NFE2L3    | 3.290581592 | 0.457712017 | 0         | NFE2L3    | NA | NA |
| FJX1      | 5.572196893 | 0.396179661 | 0         | FJX1      | NA | NA |

### caCNS PFOvsPT q<0.01

| SYMBOL   | PFOvsPT.d   | PFOvsPT.FC  | PFOvsPT.q | haCNS    | caCNS    | maCNS    |
|----------|-------------|-------------|-----------|----------|----------|----------|
| CBLN2    | -14.5548679 | 11.25652753 | 0         | NA       | CBLN2    | CBLN2    |
| CA10     | -6.12       | 5.712212733 | 0         | CA10     | CA10     | CA10     |
| NEUROD1  | -7.56103288 | 4.913636718 | 0         | NA       | NEUROD1  | NEUROD1  |
| FAM5C    | -6.27335413 | 4.382939739 | 0         | NA       | FAM5C    | FAM5C    |
| CDH8     | -6.06468643 | 4.185181997 | 0         | CDH8     | CDH8     | CDH8     |
| CNTNAP2  | -5.12221366 | 3.340737607 | 0         | CNTNAP2  | CNTNAP2  | CNTNAP2  |
| MEGF10   | -7.23068618 | 3.232916311 | 0         | NA       | MEGF10   | MEGF10   |
| TOX      | -6.24702549 | 3.160502065 | 0         | TOX      | TOX      | TOX      |
| IGSF11   | -7.55618738 | 3.097316213 | 0         | IGSF11   | IGSF11   | IGSF11   |
| SDK1     | -8.51713497 | 2.978886894 | 0         | NA       | SDK1     | NA       |
| PCDH10   | -5.84345127 | 2.908355915 | 0         | PCDH10   | PCDH10   | PCDH10   |
| PDZRN4   | -5.44764863 | 2.63707924  | 0         | PDZRN4   | PDZRN4   | PDZRN4   |
| HS6ST3   | -3.6617101  | 2.521555404 | 0         | HS6ST3   | HS6ST3   | HS6ST3   |
| PART1    | -4.64566281 | 2.46597251  | 0         | PART1    | PART1    | PART1    |
| CACNA2D3 | -5.01836394 | 2.373116161 | 0         | CACNA2D3 | CACNA2D3 | CACNA2D3 |
| PCDH17   | -5.06712243 | 2.341529223 | 0         | NA       | PCDH17   | PCDH17   |
| FLRT3    | -6.03290609 | 2.315812978 | 0         | NA       | FLRT3    | FLRT3    |
| CNTN3    | -5.12265522 | 2.1416389   | 0         | NA       | CNTN3    | CNTN3    |
| LMO4     | -5.43330418 | 2.097623295 | 0         | LMO4     | LMO4     | LMO4     |
| CNTN4    | -4.29563654 | 2.053456928 | 0         | CNTN4    | CNTN4    | CNTN4    |
| SLITRK3  | -4.2346195  | 2.044461    | 0         | NA       | SLITRK3  | NA       |

|         |             |             |           |         |         |         |
|---------|-------------|-------------|-----------|---------|---------|---------|
| MARCH 3 | -5.56101305 | 1.984234907 | 0         | MARCH 3 | MARCH 3 | NA      |
| DERA    | -3.2478245  | 1.903953655 | 0         | DERA    | DERA    | DERA    |
| FGF14   | -4.16133602 | 1.89013512  | 0         | NA      | FGF14   | FGF14   |
| PMP22   | -2.1046144  | 1.881694179 | 0.1132952 | NA      | PMP22   | NA      |
| ASTN2   | -3.537837   | 1.845172203 | 0         | ASTN2   | ASTN2   | ASTN2   |
| GBE1    | -3.79150602 | 1.82357854  | 0         | GBE1    | GBE1    | GBE1    |
| CDCA7L  | -3.20491701 | 1.821544626 | 0         | CDCA7L  | CDCA7L  | NA      |
| FAM59A  | -2.49346488 | 1.784624664 | 0         | NA      | FAM59A  | FAM59A  |
| PTPRT   | -2.74804604 | 1.717870851 | 0         | PTPRT   | PTPRT   | PTPRT   |
| SFRP2   | -2.9745118  | 1.690623422 | 0         | NA      | SFRP2   | NA      |
| ACCN1   | -2.63076477 | 1.679795978 | 0         | ACCN1   | ACCN1   | ACCN1   |
| GLIS3   | -2.10301732 | 1.664953031 | 0.1132952 | GLIS3   | GLIS3   | GLIS3   |
| ASAM    | -2.13060341 | 1.626374035 | 0.1132952 | NA      | ASAM    | ASAM    |
| CNTN6   | -2.8124791  | 1.62508137  | 0         | CNTN6   | CNTN6   | CNTN6   |
| LMO3    | -2.44233444 | 1.621965    | 0         | LMO3    | LMO3    | LMO3    |
| CBLN4   | -2.64785393 | 1.618761792 | 0         | NA      | CBLN4   | CBLN4   |
| OLFM3   | -2.34271783 | 1.609927878 | 0         | OLFM3   | OLFM3   | NA      |
| POU3F2  | -2.94748566 | 1.608230126 | 0         | POU3F2  | POU3F2  | POU3F2  |
| SLIT2   | -3.08793809 | 1.565862657 | 0         | NA      | SLIT2   | SLIT2   |
| NFIA    | -2.02490921 | 1.547560662 | 0.1132952 | NFIA    | NFIA    | NFIA    |
| EPHA4   | -2.32887211 | 1.521442732 | 0         | EPHA4   | EPHA4   | EPHA4   |
| PCDH18  | -2.4106968  | 1.507983221 | 0         | PCDH18  | PCDH18  | PCDH18  |
| ITGBL1  | -2.8160076  | 1.505764735 | 0         | NA      | ITGBL1  | ITGBL1  |
| MID1IP1 | -3.31841086 | 1.502607182 | 0         | NA      | MID1IP1 | MID1IP1 |
| ELAVL2  | -2.00023103 | 1.499451152 | 0.1132952 | ELAVL2  | ELAVL2  | ELAVL2  |
| TCF7L2  | -2.71959235 | 1.468822822 | 0         | NA      | TCF7L2  | TCF7L2  |
| SNCAIP  | -2.39993038 | 1.444568076 | 0         | NA      | SNCAIP  | SNCAIP  |
| KLF6    | -2.74045034 | 1.429321375 | 0         | NA      | KLF6    | NA      |
| HS3ST1  | -2.20065986 | 1.422808221 | 0         | HS3ST1  | HS3ST1  | HS3ST1  |
| MN1     | -2.37409167 | 1.376844253 | 0         | NA      | MN1     | MN1     |
| PRKG1   | -2.24761358 | 1.361509379 | 0         | NA      | PRKG1   | PRKG1   |
| ROBO1   | -2.1733223  | 1.360443688 | 0         | ROBO1   | ROBO1   | ROBO1   |
| DUSP6   | -1.66485337 | 1.342443608 | 0.5692172 | DUSP6   | DUSP6   | DUSP6   |
| PKP4    | -2.46392511 | 1.339819605 | 0         | NA      | PKP4    | PKP4    |
| SLC7A11 | -1.51258674 | 1.335705596 | 0.8841996 | NA      | SLC7A11 | SLC7A11 |
| GRM7    | -1.99458151 | 1.333356807 | 0.1132952 | NA      | GRM7    | GRM7    |
| PBX1    | -1.73647124 | 1.321257503 | 0.5692172 | NA      | PBX1    | PBX1    |
| ZBTB20  | -2.21439732 | 1.320427888 | 0         | ZBTB20  | ZBTB20  | ZBTB20  |
| DIAPH3  | -1.69113303 | 1.316907999 | 0.5692172 | DIAPH3  | DIAPH3  | DIAPH3  |
| AJAP1   | -2.03845117 | 1.315715838 | 0.1132952 | NA      | AJAP1   | AJAP1   |
| LPHN3   | -1.93568195 | 1.287259152 | 0.1920624 | LPHN3   | LPHN3   | LPHN3   |
| AKR1B1  | -1.88738255 | 1.266693289 | 0.1920624 | NA      | AKR1B1  | NA      |
| ZNF703  | -1.72195868 | 1.264914497 | 0.5692172 | NA      | ZNF703  | ZNF703  |
| DCC     | -1.54680033 | 1.256419694 | 0.8841996 | DCC     | DCC     | DCC     |
| DCTD    | -1.79166421 | 1.254213126 | 0.5692172 | NA      | DCTD    | DCTD    |
| ELAVL4  | -1.58841102 | 1.23423612  | 0.8841996 | NA      | ELAVL4  | ELAVL4  |
| CSMD1   | -1.6330538  | 1.202959298 | 0.8841996 | CSMD1   | CSMD1   | CSMD1   |
| UNC5C   | 1.582604759 | 0.825391046 | 0.8841996 | NA      | UNC5C   | UNC5C   |
| PTPRD   | 1.601348957 | 0.823782065 | 0.8841996 | PTPRD   | PTPRD   | PTPRD   |
| EFNA5   | 1.623838337 | 0.805562936 | 0.8841996 | EFNA5   | EFNA5   | EFNA5   |
| SATB1   | 1.865850608 | 0.798173064 | 0.1920624 | NA      | SATB1   | SATB1   |
| NR2F2   | 1.681058537 | 0.787077506 | 0.5692172 | NR2F2   | NR2F2   | NR2F2   |
| ATP2B1  | 1.710136306 | 0.786368648 | 0.5692172 | NA      | ATP2B1  | ATP2B1  |
| LRRC4C  | 1.772317163 | 0.783808549 | 0.5692172 | LRRC4C  | LRRC4C  | LRRC4C  |
| ZNF365  | 1.608012079 | 0.782204854 | 0.8841996 | ZNF365  | ZNF365  | ZNF365  |
| FANCL   | 1.958283069 | 0.776417081 | 0.1920624 | FANCL   | FANCL   | FANCL   |
| TCF4    | 1.72942339  | 0.770627215 | 0.5692172 | TCF4    | TCF4    | TCF4    |

|          |             |             |           |          |          |          |
|----------|-------------|-------------|-----------|----------|----------|----------|
| DDHD1    | 1.642298817 | 0.769818565 | 0.8841996 | NA       | DDHD1    | DDHD1    |
| STRBP    | 1.562599486 | 0.763233235 | 0.8841996 | NA       | STRBP    | NA       |
| PFTK1    | 1.720018754 | 0.757570187 | 0.5692172 | NA       | PFTK1    | PFTK1    |
| GRIA3    | 1.84845098  | 0.749806617 | 0.1920624 | GRIA3    | GRIA3    | GRIA3    |
| FAM84A   | 1.882711005 | 0.743572731 | 0.1920624 | NA       | FAM84A   | FAM84A   |
| FBXL4    | 1.703086334 | 0.743222085 | 0.5692172 | NA       | FBXL4    | NA       |
| DOK6     | 1.968978048 | 0.741947724 | 0.1920624 | NA       | DOK6     | NA       |
| PTPRG    | 1.702970376 | 0.737949782 | 0.5692172 | PTPRG    | PTPRG    | PTPRG    |
| ARHGAP15 | 2.095321106 | 0.736425741 | 0.1132952 | NA       | ARHGAP15 | ARHGAP15 |
| ETV5     | 2.064366806 | 0.735964832 | 0.1132952 | NA       | ETV5     | NA       |
| SNX16    | 2.022273678 | 0.735425143 | 0.1132952 | SNX16    | SNX16    | SNX16    |
| CTNNA2   | 2.349801056 | 0.726774235 | 0         | CTNNA2   | CTNNA2   | CTNNA2   |
| FOXP1    | 2.573537464 | 0.714898217 | 0         | NA       | FOXP1    | FOXP1    |
| EDIL3    | 2.471871838 | 0.714879738 | 0         | EDIL3    | EDIL3    | EDIL3    |
| NPAS2    | 2.413001389 | 0.711419704 | 0         | NA       | NPAS2    | NA       |
| CDH13    | 1.576661194 | 0.710124456 | 0.8841996 | CDH13    | CDH13    | CDH13    |
| NLGN1    | 1.972999378 | 0.70393173  | 0.1920624 | NLGN1    | NLGN1    | NLGN1    |
| PPARGC1A | 2.525981736 | 0.696051571 | 0         | PPARGC1A | PPARGC1A | PPARGC1A |
| VRK2     | 1.671637439 | 0.689973897 | 0.5692172 | NA       | VRK2     | VRK2     |
| GPAM     | 2.140470994 | 0.686996974 | 0.1132952 | NA       | GPAM     | GPAM     |
| GRIK1    | 2.095029121 | 0.683951491 | 0.1132952 | GRIK1    | GRIK1    | GRIK1    |
| DOK5     | 3.468938151 | 0.682774508 | 0         | DOK5     | DOK5     | DOK5     |
| MOCS2    | 2.692411446 | 0.681645694 | 0         | NA       | MOCS2    | MOCS2    |
| EFNB2    | 2.068676182 | 0.67820706  | 0.1132952 | EFNB2    | EFNB2    | EFNB2    |
| PDZRN3   | 2.399581709 | 0.662704991 | 0         | NA       | PDZRN3   | PDZRN3   |
| EPHA7    | 2.325415831 | 0.643391453 | 0         | EPHA7    | EPHA7    | EPHA7    |
| NTNG1    | 2.56015907  | 0.6424647   | 0         | NA       | NTNG1    | NTNG1    |
| SYNPR    | 2.211211773 | 0.6402151   | 0         | NA       | SYNPR    | SYNPR    |
| DPP10    | 2.354621865 | 0.6215833   | 0         | DPP10    | DPP10    | DPP10    |
| ZNF238   | 2.839086702 | 0.596913    | 0         | NA       | ZNF238   | ZNF238   |
| ANTXR2   | 3.917695399 | 0.583697192 | 0         | NA       | ANTXR2   | ANTXR2   |
| BCL11A   | 2.887541535 | 0.577424878 | 0         | BCL11A   | BCL11A   | BCL11A   |
| FST      | 2.456987371 | 0.573029999 | 0         | FST      | FST      | FST      |
| MID1     | 3.336562507 | 0.560042328 | 0         | NA       | MID1     | MID1     |
| OPCML    | 3.730784512 | 0.528980935 | 0         | OPCML    | OPCML    | OPCML    |
| PCDH7    | 4.99435407  | 0.528261246 | 0         | PCDH7    | PCDH7    | PCDH7    |
| CDH9     | 3.347253803 | 0.502386394 | 0         | CDH9     | CDH9     | CDH9     |
| NR2F1    | 4.533384717 | 0.490489804 | 0         | NR2F1    | NR2F1    | NR2F1    |
| FAM19A1  | 4.348552767 | 0.488005419 | 0         | FAM19A1  | FAM19A1  | FAM19A1  |
| NCAM2    | 3.86902789  | 0.486966988 | 0         | NCAM2    | NCAM2    | NA       |
| LPHN2    | 4.227025654 | 0.470334365 | 0         | LPHN2    | LPHN2    | LPHN2    |
| SORCS3   | 3.775183207 | 0.469115015 | 0         | SORCS3   | SORCS3   | SORCS3   |
| ROBO2    | 5.389565456 | 0.464744626 | 0         | ROBO2    | ROBO2    | ROBO2    |
| LHX2     | 5.766844002 | 0.463951405 | 0         | NA       | LHX2     | NA       |
| PCDH9    | 5.611957099 | 0.383387329 | 0         | PCDH9    | PCDH9    | PCDH9    |
| NR4A2    | 5.372879604 | 0.310340327 | 0         | NA       | NR4A2    | NR4A2    |
| NTNG2    | 5.038729141 | 0.27228346  | 0         | NA       | NTNG2    | NA       |
| LRRTM4   | 5.923967514 | 0.235613006 | 0         | LRRTM4   | LRRTM4   | LRRTM4   |
| TRHDE    | 7.463230607 | 0.22727706  | 0         | TRHDE    | TRHDE    | TRHDE    |
| SOX9     | 12.91514    | 0.116417689 | 0         | SOX9     | SOX9     | SOX9     |



**ca-haCNS PFOvsPT q<0.01**

| SYMBOL   | PFOvsPT.d   | PFOvsPT.FC  | PFOvsPT.q | haCNS | caCNS    | maCNS    |
|----------|-------------|-------------|-----------|-------|----------|----------|
| CBLN2    | -14.5548679 | 11.25652753 | 0         | NA    | CBLN2    | CBLN2    |
| NEUROD1  | -7.56103288 | 4.913636718 | 0         | NA    | NEUROD1  | NEUROD1  |
| FAM5C    | -6.27335413 | 4.382939739 | 0         | NA    | FAM5C    | FAM5C    |
| MEGF10   | -7.23068618 | 3.232916311 | 0         | NA    | MEGF10   | MEGF10   |
| SDK1     | -8.51713497 | 2.978886894 | 0         | NA    | SDK1     | NA       |
| PCDH17   | -5.06712243 | 2.341529223 | 0         | NA    | PCDH17   | PCDH17   |
| FLRT3    | -6.03290609 | 2.315812978 | 0         | NA    | FLRT3    | FLRT3    |
| CNTN3    | -5.12265522 | 2.1416389   | 0         | NA    | CNTN3    | CNTN3    |
| SLITRK3  | -4.2346195  | 2.044461    | 0         | NA    | SLITRK3  | NA       |
| FGF14    | -4.16133602 | 1.89013512  | 0         | NA    | FGF14    | FGF14    |
| PMP22    | -2.1046144  | 1.881694179 | 0.1132952 | NA    | PMP22    | NA       |
| FAM59A   | -2.49346488 | 1.784624664 | 0         | NA    | FAM59A   | FAM59A   |
| SFRP2    | -2.9745118  | 1.690623422 | 0         | NA    | SFRP2    | NA       |
| ASAM     | -2.13060341 | 1.626374035 | 0.1132952 | NA    | ASAM     | ASAM     |
| CBLN4    | -2.64785393 | 1.618761792 | 0         | NA    | CBLN4    | CBLN4    |
| SLIT2    | -3.08793809 | 1.565862657 | 0         | NA    | SLIT2    | SLIT2    |
| ITGBL1   | -2.8160076  | 1.505764735 | 0         | NA    | ITGBL1   | ITGBL1   |
| MID1IP1  | -3.31841086 | 1.502607182 | 0         | NA    | MID1IP1  | MID1IP1  |
| TCF7L2   | -2.71959235 | 1.468822822 | 0         | NA    | TCF7L2   | TCF7L2   |
| SNCAIP   | -2.39993038 | 1.444568076 | 0         | NA    | SNCAIP   | SNCAIP   |
| KLF6     | -2.74045034 | 1.429321375 | 0         | NA    | KLF6     | NA       |
| MN1      | -2.37409167 | 1.376844253 | 0         | NA    | MN1      | MN1      |
| PRKG1    | -2.24761358 | 1.361509379 | 0         | NA    | PRKG1    | PRKG1    |
| PKP4     | -2.46392511 | 1.339819605 | 0         | NA    | PKP4     | PKP4     |
| SLC7A11  | -1.51258674 | 1.335705596 | 0.8841996 | NA    | SLC7A11  | SLC7A11  |
| GRM7     | -1.99458151 | 1.333356807 | 0.1132952 | NA    | GRM7     | GRM7     |
| PBX1     | -1.73647124 | 1.321257503 | 0.5692172 | NA    | PBX1     | PBX1     |
| AJAP1    | -2.03845117 | 1.315715838 | 0.1132952 | NA    | AJAP1    | AJAP1    |
| AKR1B1   | -1.88738255 | 1.266693289 | 0.1920624 | NA    | AKR1B1   | NA       |
| ZNF703   | -1.72195868 | 1.264914497 | 0.5692172 | NA    | ZNF703   | ZNF703   |
| DCTD     | -1.79166421 | 1.254213126 | 0.5692172 | NA    | DCTD     | DCTD     |
| ELAVL4   | -1.58841102 | 1.23423612  | 0.8841996 | NA    | ELAVL4   | ELAVL4   |
| UNC5C    | 1.582604759 | 0.825391046 | 0.8841996 | NA    | UNC5C    | UNC5C    |
| SATB1    | 1.865850608 | 0.798173064 | 0.1920624 | NA    | SATB1    | SATB1    |
| ATP2B1   | 1.710136306 | 0.786368648 | 0.5692172 | NA    | ATP2B1   | ATP2B1   |
| DDHD1    | 1.642298817 | 0.769818565 | 0.8841996 | NA    | DDHD1    | DDHD1    |
| STRBP    | 1.562599486 | 0.763233235 | 0.8841996 | NA    | STRBP    | NA       |
| PFTK1    | 1.720018754 | 0.757570187 | 0.5692172 | NA    | PFTK1    | PFTK1    |
| FAM84A   | 1.882711005 | 0.743572731 | 0.1920624 | NA    | FAM84A   | FAM84A   |
| FBXL4    | 1.703086334 | 0.743222085 | 0.5692172 | NA    | FBXL4    | NA       |
| DOK6     | 1.968978048 | 0.741947724 | 0.1920624 | NA    | DOK6     | NA       |
| ARHGAP15 | 2.095321106 | 0.736425741 | 0.1132952 | NA    | ARHGAP15 | ARHGAP15 |
| ETV5     | 2.064366806 | 0.735964832 | 0.1132952 | NA    | ETV5     | NA       |
| FOXP1    | 2.573537464 | 0.714898217 | 0         | NA    | FOXP1    | FOXP1    |
| NPAS2    | 2.413001389 | 0.711419704 | 0         | NA    | NPAS2    | NA       |
| VRK2     | 1.671637439 | 0.689973897 | 0.5692172 | NA    | VRK2     | VRK2     |
| GPAM     | 2.140470994 | 0.686996974 | 0.1132952 | NA    | GPAM     | GPAM     |
| MOCS2    | 2.692411446 | 0.681645694 | 0         | NA    | MOCS2    | MOCS2    |
| PDZRN3   | 2.399581709 | 0.662704991 | 0         | NA    | PDZRN3   | PDZRN3   |
| NTNG1    | 2.56015907  | 0.6424647   | 0         | NA    | NTNG1    | NTNG1    |
| SYNPR    | 2.211211773 | 0.6402151   | 0         | NA    | SYNPR    | SYNPR    |
| ZNF238   | 2.839086702 | 0.596913    | 0         | NA    | ZNF238   | ZNF238   |

|        |             |             |   |    |        |        |
|--------|-------------|-------------|---|----|--------|--------|
| ANTXR2 | 3.917695399 | 0.583697192 | 0 | NA | ANTXR2 | ANTXR2 |
| MID1   | 3.336562507 | 0.560042328 | 0 | NA | MID1   | MID1   |
| LHX2   | 5.766844002 | 0.463951405 | 0 | NA | LHX2   | NA     |
| NR4A2  | 5.372879604 | 0.310340327 | 0 | NA | NR4A2  | NR4A2  |
| NTNG2  | 5.038729141 | 0.27228346  | 0 | NA | NTNG2  | NA     |

### **caCNS only PFOvsPT q<0.01**

| <b>SYMBOL</b> | <b>PFOvsPT.d</b> | <b>PFOvsPT.FC</b> | <b>PFOvsPT.q</b> | <b>haCNS</b> | <b>caCNS</b> | <b>maCNS</b> |
|---------------|------------------|-------------------|------------------|--------------|--------------|--------------|
| SDK1          | -8.51713497      | 2.978886894       | 0                | NA           | SDK1         | NA           |
| SLITRK3       | -4.2346195       | 2.044461          | 0                | NA           | SLITRK3      | NA           |
| PMP22         | -2.1046144       | 1.881694179       | 0.1132952        | NA           | PMP22        | NA           |
| SFRP2         | -2.9745118       | 1.690623422       | 0                | NA           | SFRP2        | NA           |
| KLF6          | -2.74045034      | 1.429321375       | 0                | NA           | KLF6         | NA           |
| AKR1B1        | -1.88738255      | 1.266693289       | 0.1920624        | NA           | AKR1B1       | NA           |
| STRBP         | 1.562599486      | 0.763233235       | 0.8841996        | NA           | STRBP        | NA           |
| FBXL4         | 1.703086334      | 0.743222085       | 0.5692172        | NA           | FBXL4        | NA           |
| DOK6          | 1.968978048      | 0.741947724       | 0.1920624        | NA           | DOK6         | NA           |
| ETV5          | 2.064366806      | 0.735964832       | 0.1132952        | NA           | ETV5         | NA           |
| NPAS2         | 2.413001389      | 0.711419704       | 0                | NA           | NPAS2        | NA           |
| LHX2          | 5.766844002      | 0.463951405       | 0                | NA           | LHX2         | NA           |
| NTNG2         | 5.038729141      | 0.27228346        | 0                | NA           | NTNG2        | NA           |

### **maCNS PFOvsPT q<0.01**

| <b>SYMBOL</b> | <b>PFOvsPT.d</b> | <b>PFOvsPT.FC</b> | <b>PFOvsPT.q</b> | <b>haCNS</b> | <b>caCNS</b> | <b>maCNS</b> |
|---------------|------------------|-------------------|------------------|--------------|--------------|--------------|
| CBLN2         | -14.5548679      | 11.25652753       | 0                | NA           | CBLN2        | CBLN2        |
| CA10          | -6.12            | 5.712212733       | 0                | CA10         | CA10         | CA10         |
| FSTL5         | -9.13405901      | 5.144152677       | 0                | NA           | NA           | FSTL5        |
| NEUROD1       | -7.56103288      | 4.913636718       | 0                | NA           | NEUROD1      | NEUROD1      |
| CBLN1         | -7.70411465      | 4.807194815       | 0                | NA           | NA           | CBLN1        |
| BDNF          | -6.02848348      | 4.730594258       | 0                | NA           | NA           | BDNF         |
| ZNF423        | -6.90224806      | 4.597465111       | 0                | NA           | NA           | ZNF423       |
| FAM5C         | -6.27335413      | 4.382939739       | 0                | NA           | FAM5C        | FAM5C        |
| CDH8          | -6.06468643      | 4.185181997       | 0                | CDH8         | CDH8         | CDH8         |
| TFAP2D        | -3.50782293      | 3.658017759       | 0                | TFAP2D       | NA           | TFAP2D       |
| CNTNAP2       | -5.12221366      | 3.340737607       | 0                | CNTNAP2      | CNTNAP2      | CNTNAP2      |
| STXBP6        | -7.55969727      | 3.299394519       | 0                | STXBP6       | NA           | STXBP6       |
| MEGF10        | -7.23068618      | 3.232916311       | 0                | NA           | MEGF10       | MEGF10       |
| MEIS2         | -8.05642148      | 3.203435352       | 0                | MEIS2        | NA           | MEIS2        |
| TOX           | -6.24702549      | 3.160502065       | 0                | TOX          | TOX          | TOX          |
| IGSF11        | -7.55618738      | 3.097316213       | 0                | IGSF11       | IGSF11       | IGSF11       |
| PCDH10        | -5.84345127      | 2.908355915       | 0                | PCDH10       | PCDH10       | PCDH10       |
| CHRDL1        | -4.52809552      | 2.883850704       | 0                | CHRDL1       | NA           | CHRDL1       |
| PTX3          | -5.00633748      | 2.692349177       | 0                | NA           | NA           | PTX3         |
| PDZRN4        | -5.44764863      | 2.63707924        | 0                | PDZRN4       | PDZRN4       | PDZRN4       |
| BMP2          | -4.21371593      | 2.614685809       | 0                | BMP2         | NA           | BMP2         |
| HS6ST3        | -3.6617101       | 2.521555404       | 0                | HS6ST3       | HS6ST3       | HS6ST3       |
| PART1         | -4.64566281      | 2.46597251        | 0                | PART1        | PART1        | PART1        |
| EMX2          | -3.67376004      | 2.379665984       | 0                | EMX2         | NA           | EMX2         |

|            |             |             |           |          |          |            |
|------------|-------------|-------------|-----------|----------|----------|------------|
| CACNA2D3   | -5.01836394 | 2.373116161 | 0         | CACNA2D3 | CACNA2D3 | CACNA2D3   |
| ST6GALNAC5 | -6.09921617 | 2.366577756 | 0         | NA       | NA       | ST6GALNAC5 |
| PCDH17     | -5.06712243 | 2.341529223 | 0         | NA       | PCDH17   | PCDH17     |
| FLRT3      | -6.03290609 | 2.315812978 | 0         | NA       | FLRT3    | FLRT3      |
| ANKRD32    | -5.24414946 | 2.29550366  | 0         | ANKRD32  | NA       | ANKRD32    |
| PTER       | -3.93798799 | 2.213952941 | 0         | PTER     | NA       | PTER       |
| CNTN3      | -5.12265522 | 2.1416389   | 0         | NA       | CNTN3    | CNTN3      |
| LMO4       | -5.43330418 | 2.097623295 | 0         | LMO4     | LMO4     | LMO4       |
| MC4R       | -2.74483075 | 2.077390683 | 0         | NA       | NA       | MC4R       |
| CYP26A1    | -2.91046367 | 2.070475578 | 0         | NA       | NA       | CYP26A1    |
| CNTN4      | -4.29563654 | 2.053456928 | 0         | CNTN4    | CNTN4    | CNTN4      |
| LRRC3B     | -4.8019253  | 1.974090641 | 0         | NA       | NA       | LRRC3B     |
| DERA       | -3.2478245  | 1.903953655 | 0         | DERA     | DERA     | DERA       |
| FGF14      | -4.16133602 | 1.89013512  | 0         | NA       | FGF14    | FGF14      |
| ASTN2      | -3.537837   | 1.845172203 | 0         | ASTN2    | ASTN2    | ASTN2      |
| PLK2       | -4.18086128 | 1.840616327 | 0         | NA       | NA       | PLK2       |
| GBE1       | -3.79150602 | 1.82357854  | 0         | GBE1     | GBE1     | GBE1       |
| KCNQ5      | -3.4225801  | 1.815481633 | 0         | NA       | NA       | KCNQ5      |
| NEBL       | -3.95962297 | 1.814775522 | 0         | NA       | NA       | NEBL       |
| FAM59A     | -2.49346488 | 1.784624664 | 0         | NA       | FAM59A   | FAM59A     |
| HS3ST5     | -2.68310547 | 1.772104321 | 0         | HS3ST5   | NA       | HS3ST5     |
| ADAMTS16   | -2.36220106 | 1.760054514 | 0         | ADAMTS16 | NA       | ADAMTS16   |
| RPH3A      | -1.83743736 | 1.750384294 | 0.1920624 | NA       | NA       | RPH3A      |
| BAMBI      | -2.54868324 | 1.746195742 | 0         | NA       | NA       | BAMBI      |
| TNFAIP3    | -1.74599811 | 1.72654034  | 0.5692172 | NA       | NA       | TNFAIP3    |
| PTPRT      | -2.74804604 | 1.717870851 | 0         | PTPRT    | PTPRT    | PTPRT      |
| NRIP1      | -3.2856362  | 1.715123759 | 0         | NA       | NA       | NRIP1      |
| CDH12      | -3.09316342 | 1.701936008 | 0         | NA       | NA       | CDH12      |
| CXXC4      | -3.9002226  | 1.683449791 | 0         | NA       | NA       | CXXC4      |
| ACCN1      | -2.63076477 | 1.679795978 | 0         | ACCN1    | ACCN1    | ACCN1      |
| GLIS3      | -2.10301732 | 1.664953031 | 0.1132952 | GLIS3    | GLIS3    | GLIS3      |
| PHLDA1     | -4.05016913 | 1.659226237 | 0         | NA       | NA       | PHLDA1     |
| KIT        | -3.17697957 | 1.637540014 | 0         | NA       | NA       | KIT        |
| POU6F2     | -2.68054389 | 1.636633705 | 0         | POU6F2   | NA       | POU6F2     |
| UST        | -2.35119547 | 1.632375331 | 0         | NA       | NA       | UST        |
| ASAM       | -2.13060341 | 1.626374035 | 0.1132952 | NA       | ASAM     | ASAM       |
| SOCS2      | -2.38288631 | 1.626189776 | 0         | NA       | NA       | SOCS2      |
| CNTN6      | -2.8124791  | 1.62508137  | 0         | CNTN6    | CNTN6    | CNTN6      |
| LMO3       | -2.44233444 | 1.621965    | 0         | LMO3     | LMO3     | LMO3       |
| CBLN4      | -2.64785393 | 1.618761792 | 0         | NA       | CBLN4    | CBLN4      |
| ADCYAP1    | -3.09707721 | 1.615928824 | 0         | NA       | NA       | ADCYAP1    |
| POU3F2     | -2.94748566 | 1.608230126 | 0         | POU3F2   | POU3F2   | POU3F2     |
| THRB       | -2.1344228  | 1.601725202 | 0.1132952 | NA       | NA       | THRB       |
| FAM5B      | -2.75243221 | 1.600873707 | 0         | NA       | NA       | FAM5B      |
| SLIT2      | -3.08793809 | 1.565862657 | 0         | NA       | SLIT2    | SLIT2      |
| NFIA       | -2.02490921 | 1.547560662 | 0.1132952 | NFIA     | NFIA     | NFIA       |
| TSPAN6     | -1.97172607 | 1.546995067 | 0.1920624 | NA       | NA       | TSPAN6     |
| QPCT       | -1.69896847 | 1.522678029 | 0.5692172 | NA       | NA       | QPCT       |
| EPHA4      | -2.32887211 | 1.521442732 | 0         | EPHA4    | EPHA4    | EPHA4      |
| PCDH18     | -2.4106968  | 1.507983221 | 0         | PCDH18   | PCDH18   | PCDH18     |
| ITGBL1     | -2.8160076  | 1.505764735 | 0         | NA       | ITGBL1   | ITGBL1     |
| MID1IP1    | -3.31841086 | 1.502607182 | 0         | NA       | MID1IP1  | MID1IP1    |
| CTGF       | -1.7315289  | 1.501443714 | 0.5692172 | NA       | NA       | CTGF       |
| ELAVL2     | -2.00023103 | 1.499451152 | 0.1132952 | ELAVL2   | ELAVL2   | ELAVL2     |
| ITGA9      | -2.81551544 | 1.488179049 | 0         | NA       | NA       | ITGA9      |
| C7orf36    | -2.15755103 | 1.485669325 | 0.1132952 | NA       | NA       | C7orf36    |
| ADAMTS3    | -2.41327432 | 1.484830156 | 0         | NA       | NA       | ADAMTS3    |

|          |             |             |           |          |         |          |
|----------|-------------|-------------|-----------|----------|---------|----------|
| POU3F3   | -2.37286138 | 1.478080999 | 0         | POU3F3   | NA      | POU3F3   |
| LRRTM1   | -1.74257338 | 1.476807726 | 0.5692172 | LRRTM1   | NA      | LRRTM1   |
| TCF7L2   | -2.71959235 | 1.468822822 | 0         | NA       | TCF7L2  | TCF7L2   |
| COL12A1  | -2.56005564 | 1.458176067 | 0         | NA       | NA      | COL12A1  |
| PARP8    | -1.89900276 | 1.453057443 | 0.1920624 | PARP8    | NA      | PARP8    |
| SNCAIP   | -2.39993038 | 1.444568076 | 0         | NA       | SNCAIP  | SNCAIP   |
| LDB2     | -2.89311943 | 1.4399603   | 0         | LDB2     | NA      | LDB2     |
| GAS1     | -2.82070171 | 1.439256816 | 0         | NA       | NA      | GAS1     |
| RRAS2    | -2.21380586 | 1.436160734 | 0         | NA       | NA      | RRAS2    |
| RFK      | -3.07661835 | 1.428068941 | 0         | NA       | NA      | RFK      |
| HS3ST1   | -2.20065986 | 1.422808221 | 0         | HS3ST1   | HS3ST1  | HS3ST1   |
| SUPT3H   | -1.88285687 | 1.410333462 | 0.1920624 | SUPT3H   | NA      | SUPT3H   |
| H2AFY2   | -2.90931696 | 1.401067056 | 0         | NA       | NA      | H2AFY2   |
| PLCB4    | -1.9883246  | 1.386326283 | 0.1920624 | NA       | NA      | PLCB4    |
| CHN1     | -2.31384252 | 1.384545514 | 0         | NA       | NA      | CHN1     |
| MN1      | -2.37409167 | 1.376844253 | 0         | NA       | MN1     | MN1      |
| SLITRK1  | -2.3569568  | 1.363953962 | 0         | SLITRK1  | NA      | SLITRK1  |
| PRKG1    | -2.24761358 | 1.361509379 | 0         | NA       | PRKG1   | PRKG1    |
| ROBO1    | -2.1733223  | 1.360443688 | 0         | ROBO1    | ROBO1   | ROBO1    |
| DIO2     | -1.68458127 | 1.345644949 | 0.5692172 | NA       | NA      | DIO2     |
| DUSP6    | -1.66485337 | 1.342443608 | 0.5692172 | DUSP6    | DUSP6   | DUSP6    |
| PKP4     | -2.46392511 | 1.339819605 | 0         | NA       | PKP4    | PKP4     |
| TNFRSF21 | -2.27712882 | 1.337971486 | 0         | TNFRSF21 | NA      | TNFRSF21 |
| APBB2    | -1.93694713 | 1.337819274 | 0.1920624 | NA       | NA      | APBB2    |
| SH3D19   | -2.18016659 | 1.337417312 | 0         | NA       | NA      | SH3D19   |
| ZADH2    | -1.93886437 | 1.336059328 | 0.1920624 | NA       | NA      | ZADH2    |
| SLC7A11  | -1.51258674 | 1.335705596 | 0.8841996 | NA       | SLC7A11 | SLC7A11  |
| GRM7     | -1.99458151 | 1.333356807 | 0.1132952 | NA       | GRM7    | GRM7     |
| QDPR     | -2.19795663 | 1.330727363 | 0         | NA       | NA      | QDPR     |
| GRIK2    | -2.10003409 | 1.327840632 | 0.1132952 | GRIK2    | NA      | GRIK2    |
| AADAT    | -2.50286153 | 1.324581374 | 0         | AADAT    | NA      | AADAT    |
| DPF3     | -1.99485721 | 1.322803272 | 0.1132952 | NA       | NA      | DPF3     |
| PRKD1    | -1.92726666 | 1.322584174 | 0.1920624 | NA       | NA      | PRKD1    |
| GRM5     | -2.08737967 | 1.322098237 | 0.1132952 | NA       | NA      | GRM5     |
| PBX1     | -1.73647124 | 1.321257503 | 0.5692172 | NA       | PBX1    | PBX1     |
| ADRA2A   | -2.2026569  | 1.32088762  | 0         | NA       | NA      | ADRA2A   |
| NINJ2    | -1.80627593 | 1.320586093 | 0.5692172 | NA       | NA      | NINJ2    |
| ZBTB20   | -2.21439732 | 1.320427888 | 0         | ZBTB20   | ZBTB20  | ZBTB20   |
| DIAPH3   | -1.69113303 | 1.316907999 | 0.5692172 | DIAPH3   | DIAPH3  | DIAPH3   |
| KCNK2    | -1.6590451  | 1.315874513 | 0.5692172 | NA       | NA      | KCNK2    |
| AJAP1    | -2.03845117 | 1.315715838 | 0.1132952 | NA       | AJAP1   | AJAP1    |
| CRADD    | -1.62279567 | 1.302153136 | 0.8841996 | NA       | NA      | CRADD    |
| LPHN3    | -1.93568195 | 1.287259152 | 0.1920624 | LPHN3    | LPHN3   | LPHN3    |
| RUNX2    | -1.6858028  | 1.284678259 | 0.5692172 | NA       | NA      | RUNX2    |
| RSPO3    | -1.53076447 | 1.282867266 | 0.8841996 | NA       | NA      | RSPO3    |
| TBR1     | -1.78527877 | 1.281547876 | 0.5692172 | TBR1     | NA      | TBR1     |
| E2F3     | -1.74676342 | 1.278940873 | 0.5692172 | NA       | NA      | E2F3     |
| MYO1B    | -1.65357423 | 1.269053424 | 0.8841996 | NA       | NA      | MYO1B    |
| CDH11    | -1.68075954 | 1.267706284 | 0.5692172 | CDH11    | NA      | CDH11    |
| ZNF703   | -1.72195868 | 1.264914497 | 0.5692172 | NA       | ZNF703  | ZNF703   |
| MAOA     | -1.72301752 | 1.264390327 | 0.5692172 | NA       | NA      | MAOA     |
| CACNA1D  | -1.80598597 | 1.264322789 | 0.5692172 | NA       | NA      | CACNA1D  |
| WWP2     | -1.66442974 | 1.262947586 | 0.5692172 | NA       | NA      | WWP2     |
| MYC      | -1.84922178 | 1.260900838 | 0.1920624 | NA       | NA      | MYC      |
| DCC      | -1.54680033 | 1.256419694 | 0.8841996 | DCC      | DCC     | DCC      |
| DCTD     | -1.79166421 | 1.254213126 | 0.5692172 | NA       | DCTD    | DCTD     |
| ID4      | -1.71418298 | 1.249410143 | 0.5692172 | ID4      | NA      | ID4      |

|          |             |             |           |         |          |          |
|----------|-------------|-------------|-----------|---------|----------|----------|
| CA8      | -1.72634986 | 1.239795344 | 0.5692172 | NA      | NA       | CA8      |
| CSMD3    | -1.53036727 | 1.234721195 | 0.8841996 | CSMD3   | NA       | CSMD3    |
| ELAVL4   | -1.58841102 | 1.23423612  | 0.8841996 | NA      | ELAVL4   | ELAVL4   |
| NRXN3    | -1.67797848 | 1.232510319 | 0.5692172 | NRXN3   | NA       | NRXN3    |
| ZNF706   | -1.84899918 | 1.22405684  | 0.1920624 | NA      | NA       | ZNF706   |
| ZNF395   | -1.59880805 | 1.21514445  | 0.8841996 | NA      | NA       | ZNF395   |
| KCNF1    | -1.62789501 | 1.214471747 | 0.8841996 | NA      | NA       | KCNF1    |
| ARL4C    | -1.70895532 | 1.213335346 | 0.5692172 | NA      | NA       | ARL4C    |
| CSMD1    | -1.6330538  | 1.202959298 | 0.8841996 | CSMD1   | CSMD1    | CSMD1    |
| UNC5C    | 1.582604759 | 0.825391046 | 0.8841996 | NA      | UNC5C    | UNC5C    |
| PTPRD    | 1.601348957 | 0.823782065 | 0.8841996 | PTPRD   | PTPRD    | PTPRD    |
| DGKH     | 1.670851083 | 0.817662921 | 0.5692172 | NA      | NA       | DGKH     |
| RHOBTB1  | 1.520346451 | 0.806511173 | 0.8841996 | NA      | NA       | RHOBTB1  |
| EFNA5    | 1.623838337 | 0.805562936 | 0.8841996 | EFNA5   | EFNA5    | EFNA5    |
| ITGA4    | 1.554255687 | 0.803971291 | 0.8841996 | NA      | NA       | ITGA4    |
| CACNB2   | 1.758489199 | 0.803207464 | 0.5692172 | NA      | NA       | CACNB2   |
| XYLT1    | 1.922205135 | 0.80021924  | 0.1920624 | XYLT1   | NA       | XYLT1    |
| KBTBD8   | 1.572020284 | 0.799328082 | 0.8841996 | NA      | NA       | KBTBD8   |
| SATB1    | 1.865850608 | 0.798173064 | 0.1920624 | NA      | SATB1    | SATB1    |
| TLN2     | 1.634174676 | 0.797965962 | 0.8841996 | NA      | NA       | TLN2     |
| GRM3     | 1.796391511 | 0.795173215 | 0.5692172 | NA      | NA       | GRM3     |
| AMIGO2   | 1.538916893 | 0.790467469 | 0.8841996 | NA      | NA       | AMIGO2   |
| CLYBL    | 1.540808211 | 0.789655223 | 0.8841996 | CLYBL   | NA       | CLYBL    |
| GPD2     | 1.594044077 | 0.789623285 | 0.8841996 | NA      | NA       | GPD2     |
| DNAJC1   | 1.883652286 | 0.787195104 | 0.1920624 | NA      | NA       | DNAJC1   |
| NR2F2    | 1.681058537 | 0.787077506 | 0.5692172 | NR2F2   | NR2F2    | NR2F2    |
| ATP2B1   | 1.710136306 | 0.786368648 | 0.5692172 | NA      | ATP2B1   | ATP2B1   |
| LRRC4C   | 1.772317163 | 0.783808549 | 0.5692172 | LRRC4C  | LRRC4C   | LRRC4C   |
| MITF     | 1.626351977 | 0.782694496 | 0.8841996 | MITF    | NA       | MITF     |
| ZNF365   | 1.608012079 | 0.782204854 | 0.8841996 | ZNF365  | ZNF365   | ZNF365   |
| AP1S2    | 2.177174512 | 0.781873197 | 0.1132952 | NA      | NA       | AP1S2    |
| HNMT     | 1.641286706 | 0.779961652 | 0.8841996 | HNMT    | NA       | HNMT     |
| AMMECR1  | 1.789781392 | 0.779275819 | 0.5692172 | NA      | NA       | AMMECR1  |
| CNTNAP5  | 1.867266525 | 0.778953903 | 0.1920624 | CNTNAP5 | NA       | CNTNAP5  |
| FANCL    | 1.958283069 | 0.776417081 | 0.1920624 | FANCL   | FANCL    | FANCL    |
| NR4A3    | 2.057562608 | 0.775546131 | 0.1132952 | NA      | NA       | NR4A3    |
| BRAF     | 1.606726902 | 0.773847676 | 0.8841996 | NA      | NA       | BRAF     |
| TCF4     | 1.72942339  | 0.770627215 | 0.5692172 | TCF4    | TCF4     | TCF4     |
| DDHD1    | 1.642298817 | 0.769818565 | 0.8841996 | NA      | DDHD1    | DDHD1    |
| IGSF21   | 1.819825649 | 0.764397197 | 0.1920624 | NA      | NA       | IGSF21   |
| TRIM44   | 1.980988715 | 0.763210785 | 0.1920624 | NA      | NA       | TRIM44   |
| HCN1     | 1.876834754 | 0.759545131 | 0.1920624 | NA      | NA       | HCN1     |
| PFTK1    | 1.720018754 | 0.757570187 | 0.5692172 | NA      | PFTK1    | PFTK1    |
| DPYD     | 1.91158004  | 0.757162176 | 0.1920624 | NA      | NA       | DPYD     |
| PTPRZ1   | 2.110731279 | 0.756312617 | 0.1132952 | NA      | NA       | PTPRZ1   |
| PAG1     | 1.992347617 | 0.753555654 | 0.1920624 | NA      | NA       | PAG1     |
| GRIA3    | 1.84845098  | 0.749806617 | 0.1920624 | GRIA3   | GRIA3    | GRIA3    |
| ACVR1    | 1.901681292 | 0.74909317  | 0.1920624 | ACVR1   | NA       | ACVR1    |
| RPS6KA3  | 2.039452923 | 0.748799368 | 0.1132952 | NA      | NA       | RPS6KA3  |
| FAM84A   | 1.882711005 | 0.743572731 | 0.1920624 | NA      | FAM84A   | FAM84A   |
| SLC44A5  | 1.508018492 | 0.740117703 | 0.8841996 | NA      | NA       | SLC44A5  |
| CXCR4    | 2.472439403 | 0.739130617 | 0         | CXCR4   | NA       | CXCR4    |
| PTPRG    | 1.702970376 | 0.737949782 | 0.5692172 | PTPRG   | PTPRG    | PTPRG    |
| ARHGAP15 | 2.095321106 | 0.736425741 | 0.1132952 | NA      | ARHGAP15 | ARHGAP15 |
| STIM2    | 1.601732135 | 0.736379264 | 0.8841996 | NA      | NA       | STIM2    |
| SNX16    | 2.022273678 | 0.735425143 | 0.1132952 | SNX16   | SNX16    | SNX16    |
| PHF17    | 1.940661664 | 0.735165164 | 0.1920624 | NA      | NA       | PHF17    |

|          |             |             |           |          |          |          |
|----------|-------------|-------------|-----------|----------|----------|----------|
| NEDD4    | 2.135901336 | 0.73156625  | 0.1132952 | NA       | NA       | NEDD4    |
| CDCA7    | 2.32970259  | 0.730819321 | 0         | NA       | NA       | CDCA7    |
| LRRC7    | 2.138431829 | 0.730778933 | 0.1132952 | LRRC7    | NA       | LRRC7    |
| ETV1     | 1.869400066 | 0.729205933 | 0.1920624 | NA       | NA       | ETV1     |
| CTNNA2   | 2.349801056 | 0.726774235 | 0         | CTNNA2   | CTNNA2   | CTNNA2   |
| C18orf1  | 2.627212485 | 0.726582856 | 0         | NA       | NA       | C18orf1  |
| BCL2     | 1.626209371 | 0.724973607 | 0.8841996 | NA       | NA       | BCL2     |
| OMG      | 2.048961701 | 0.722212659 | 0.1132952 | NA       | NA       | OMG      |
| COMMD2   | 2.67383655  | 0.720154885 | 0         | NA       | NA       | COMMD2   |
| RFC3     | 2.091418981 | 0.715670472 | 0.1132952 | NA       | NA       | RFC3     |
| FOXP1    | 2.573537464 | 0.714898217 | 0         | NA       | FOXP1    | FOXP1    |
| EDIL3    | 2.471871838 | 0.714879738 | 0         | EDIL3    | EDIL3    | EDIL3    |
| FBXL17   | 1.890691069 | 0.714815869 | 0.1920624 | NA       | NA       | FBXL17   |
| PBX3     | 2.630409665 | 0.710301985 | 0         | PBX3     | NA       | PBX3     |
| CDH13    | 1.576661194 | 0.710124456 | 0.8841996 | CDH13    | CDH13    | CDH13    |
| NLGN1    | 1.972999378 | 0.70393173  | 0.1920624 | NLGN1    | NLGN1    | NLGN1    |
| MGST1    | 1.860475221 | 0.701691591 | 0.1920624 | NA       | NA       | MGST1    |
| KIAA1797 | 2.297017196 | 0.701044018 | 0         | KIAA1797 | NA       | KIAA1797 |
| SEZ6L    | 2.383782992 | 0.700835855 | 0         | NA       | NA       | SEZ6L    |
| PPARGC1A | 2.525981736 | 0.696051571 | 0         | PPARGC1A | PPARGC1A | PPARGC1A |
| VRK2     | 1.671637439 | 0.689973897 | 0.5692172 | NA       | VRK2     | VRK2     |
| ANK2     | 1.980579316 | 0.689171439 | 0.1920624 | NA       | NA       | ANK2     |
| MAN2A1   | 1.735773326 | 0.688175588 | 0.5692172 | NA       | NA       | MAN2A1   |
| GPAM     | 2.140470994 | 0.686996974 | 0.1132952 | NA       | GPAM     | GPAM     |
| GRIK1    | 2.095029121 | 0.683951491 | 0.1132952 | GRIK1    | GRIK1    | GRIK1    |
| DOK5     | 3.468938151 | 0.682774508 | 0         | DOK5     | DOK5     | DOK5     |
| MOCS2    | 2.692411446 | 0.681645694 | 0         | NA       | MOCS2    | MOCS2    |
| PAPPA2   | 3.35479031  | 0.678214016 | 0         | NA       | NA       | PAPPA2   |
| EFNB2    | 2.068676182 | 0.67820706  | 0.1132952 | EFNB2    | EFNB2    | EFNB2    |
| CAMK4    | 2.598144006 | 0.673869172 | 0         | NA       | NA       | CAMK4    |
| PDGFD    | 2.180255964 | 0.672588258 | 0.1132952 | NA       | NA       | PDGFD    |
| UFM1     | 2.580881702 | 0.671223127 | 0         | NA       | NA       | UFM1     |
| FRZB     | 2.87648549  | 0.666397665 | 0         | NA       | NA       | FRZB     |
| SATB2    | 2.013867357 | 0.665230402 | 0.1132952 | NA       | NA       | SATB2    |
| PDZRN3   | 2.399581709 | 0.662704991 | 0         | NA       | PDZRN3   | PDZRN3   |
| NCOA2    | 2.324436097 | 0.655431563 | 0         | NA       | NA       | NCOA2    |
| KCNJ2    | 1.894681369 | 0.651676841 | 0.1920624 | NA       | NA       | KCNJ2    |
| DACT1    | 3.761208821 | 0.651434098 | 0         | NA       | NA       | DACT1    |
| PTDSS1   | 3.51016526  | 0.65010501  | 0         | NA       | NA       | PTDSS1   |
| CPNE4    | 2.235536593 | 0.649730283 | 0         | NA       | NA       | CPNE4    |
| B3GALT2  | 3.186066515 | 0.643552774 | 0         | NA       | NA       | B3GALT2  |
| EPHA7    | 2.325415831 | 0.643391453 | 0         | EPHA7    | EPHA7    | EPHA7    |
| NTNG1    | 2.56015907  | 0.6424647   | 0         | NA       | NTNG1    | NTNG1    |
| SYNPR    | 2.211211773 | 0.6402151   | 0         | NA       | SYNPR    | SYNPR    |
| ITPR1    | 3.650092417 | 0.639788798 | 0         | ITPR1    | NA       | ITPR1    |
| LRRN3    | 3.792313283 | 0.62994277  | 0         | NA       | NA       | LRRN3    |
| DPP10    | 2.354621865 | 0.6215833   | 0         | DPP10    | DPP10    | DPP10    |
| PLEKHH2  | 2.707449053 | 0.600841423 | 0         | NA       | NA       | PLEKHH2  |
| ZNF238   | 2.839086702 | 0.596913    | 0         | NA       | ZNF238   | ZNF238   |
| ANTXR2   | 3.917695399 | 0.583697192 | 0         | NA       | ANTXR2   | ANTXR2   |
| MCTP1    | 3.610437125 | 0.580458414 | 0         | MCTP1    | NA       | MCTP1    |
| TNFAIP8  | 2.545221104 | 0.577656874 | 0         | NA       | NA       | TNFAIP8  |
| BCL11A   | 2.887541535 | 0.577424878 | 0         | BCL11A   | BCL11A   | BCL11A   |
| FST      | 2.456987371 | 0.573029999 | 0         | FST      | FST      | FST      |
| MET      | 3.694266312 | 0.562007528 | 0         | NA       | NA       | MET      |
| MID1     | 3.336562507 | 0.560042328 | 0         | NA       | MID1     | MID1     |
| NR3C1    | 3.988644401 | 0.55590161  | 0         | NA       | NA       | NR3C1    |

|         |             |             |   |         |         |         |
|---------|-------------|-------------|---|---------|---------|---------|
| INHBA   | 3.850344657 | 0.535772384 | 0 | NA      | NA      | INHBA   |
| KCNT2   | 2.308815908 | 0.535764159 | 0 | NA      | NA      | KCNT2   |
| OPCML   | 3.730784512 | 0.528980935 | 0 | OPCML   | OPCML   | OPCML   |
| PCDH7   | 4.99435407  | 0.528261246 | 0 | PCDH7   | PCDH7   | PCDH7   |
| LDLRAD3 | 4.033439074 | 0.510085712 | 0 | NA      | NA      | LDLRAD3 |
| CDH9    | 3.347253803 | 0.502386394 | 0 | CDH9    | CDH9    | CDH9    |
| GRB14   | 2.572872656 | 0.493036094 | 0 | NA      | NA      | GRB14   |
| NR2F1   | 4.533384717 | 0.490489804 | 0 | NR2F1   | NR2F1   | NR2F1   |
| FAM19A1 | 4.348552767 | 0.488005419 | 0 | FAM19A1 | FAM19A1 | FAM19A1 |
| SORCS1  | 4.398843879 | 0.484518816 | 0 | SORCS1  | NA      | SORCS1  |
| GPR22   | 3.324830791 | 0.478356979 | 0 | NA      | NA      | GPR22   |
| PLCXD3  | 4.26694021  | 0.476284155 | 0 | NA      | NA      | PLCXD3  |
| LPHN2   | 4.227025654 | 0.470334365 | 0 | LPHN2   | LPHN2   | LPHN2   |
| SORCS3  | 3.775183207 | 0.469115015 | 0 | SORCS3  | SORCS3  | SORCS3  |
| ROBO2   | 5.389565456 | 0.464744626 | 0 | ROBO2   | ROBO2   | ROBO2   |
| RSPO2   | 4.472734211 | 0.456294973 | 0 | NA      | NA      | RSPO2   |
| MPP6    | 2.827116918 | 0.455774816 | 0 | NA      | NA      | MPP6    |
| DGKI    | 2.8821568   | 0.445093854 | 0 | NA      | NA      | DGKI    |
| ST6GAL2 | 4.531853789 | 0.443982207 | 0 | NA      | NA      | ST6GAL2 |
| LGI1    | 5.01261104  | 0.4257431   | 0 | NA      | NA      | LGI1    |
| PROK2   | 3.992329864 | 0.403362522 | 0 | NA      | NA      | PROK2   |
| PTPRK   | 4.763210281 | 0.397753704 | 0 | PTPRK   | NA      | PTPRK   |
| BARD1   | 3.883937603 | 0.394424527 | 0 | BARD1   | NA      | BARD1   |
| DACH2   | 5.39837332  | 0.393896261 | 0 | NA      | NA      | DACH2   |
| PCDH9   | 5.611957099 | 0.383387329 | 0 | PCDH9   | PCDH9   | PCDH9   |
| AKT3    | 5.224519542 | 0.382303266 | 0 | NA      | NA      | AKT3    |
| TGFB2   | 5.287867211 | 0.380547566 | 0 | NA      | NA      | TGFB2   |
| NR3C2   | 6.294811103 | 0.354365206 | 0 | NR3C2   | NA      | NR3C2   |
| TLE1    | 9.233379941 | 0.333319215 | 0 | NA      | NA      | TLE1    |
| NR4A2   | 5.372879604 | 0.310340327 | 0 | NA      | NR4A2   | NR4A2   |
| THBS1   | 5.220709261 | 0.278367583 | 0 | NA      | NA      | THBS1   |
| LRRTM4  | 5.923967514 | 0.235613006 | 0 | LRRTM4  | LRRTM4  | LRRTM4  |
| TRHDE   | 7.463230607 | 0.22727706  | 0 | TRHDE   | TRHDE   | TRHDE   |
| NPY     | 10.48770135 | 0.152609434 | 0 | NA      | NA      | NPY     |
| PCSK2   | 11.20597583 | 0.125898457 | 0 | NA      | NA      | PCSK2   |
| SOX9    | 12.91514    | 0.116417689 | 0 | SOX9    | SOX9    | SOX9    |

### **ma-haCNS PFOvsPT q<0.01**

| <b>SYMBOL</b> | <b>PFOvsPT.d</b> | <b>PFOvsPT.FC</b> | <b>PFOvsPT.q</b> | <b>haCNS</b> | <b>caCNS</b> | <b>maCNS</b> |
|---------------|------------------|-------------------|------------------|--------------|--------------|--------------|
| CBLN2         | -14.5548679      | 11.25652753       | 0                | NA           | CBLN2        | CBLN2        |
| FSTL5         | -9.13405901      | 5.144152677       | 0                | NA           | NA           | FSTL5        |
| NEUROD1       | -7.56103288      | 4.913636718       | 0                | NA           | NEUROD1      | NEUROD1      |
| CBLN1         | -7.70411465      | 4.807194815       | 0                | NA           | NA           | CBLN1        |
| BDNF          | -6.02848348      | 4.730594258       | 0                | NA           | NA           | BDNF         |
| ZNF423        | -6.90224806      | 4.597465111       | 0                | NA           | NA           | ZNF423       |
| FAM5C         | -6.27335413      | 4.382939739       | 0                | NA           | FAM5C        | FAM5C        |
| MEGF10        | -7.23068618      | 3.232916311       | 0                | NA           | MEGF10       | MEGF10       |
| PTX3          | -5.00633748      | 2.692349177       | 0                | NA           | NA           | PTX3         |
| ST6GALNAC5    | -6.09921617      | 2.366577756       | 0                | NA           | NA           | ST6GALNAC5   |

|         |             |             |           |    |         |         |
|---------|-------------|-------------|-----------|----|---------|---------|
| PCDH17  | -5.06712243 | 2.341529223 | 0         | NA | PCDH17  | PCDH17  |
| FLRT3   | -6.03290609 | 2.315812978 | 0         | NA | FLRT3   | FLRT3   |
| CNTN3   | -5.12265522 | 2.1416389   | 0         | NA | CNTN3   | CNTN3   |
| MC4R    | -2.74483075 | 2.077390683 | 0         | NA | NA      | MC4R    |
| CYP26A1 | -2.91046367 | 2.070475578 | 0         | NA | NA      | CYP26A1 |
| LRRC3B  | -4.8019253  | 1.974090641 | 0         | NA | NA      | LRRC3B  |
| FGF14   | -4.16133602 | 1.89013512  | 0         | NA | FGF14   | FGF14   |
| PLK2    | -4.18086128 | 1.840616327 | 0         | NA | NA      | PLK2    |
| KCNQ5   | -3.4225801  | 1.815481633 | 0         | NA | NA      | KCNQ5   |
| NEBL    | -3.95962297 | 1.814775522 | 0         | NA | NA      | NEBL    |
| FAM59A  | -2.49346488 | 1.784624664 | 0         | NA | FAM59A  | FAM59A  |
| RPH3A   | -1.83743736 | 1.750384294 | 0.1920624 | NA | NA      | RPH3A   |
| BAMBI   | -2.54868324 | 1.746195742 | 0         | NA | NA      | BAMBI   |
| TNFAIP3 | -1.74599811 | 1.72654034  | 0.5692172 | NA | NA      | TNFAIP3 |
| NRIP1   | -3.2856362  | 1.715123759 | 0         | NA | NA      | NRIP1   |
| CDH12   | -3.09316342 | 1.701936008 | 0         | NA | NA      | CDH12   |
| CXXC4   | -3.9002226  | 1.683449791 | 0         | NA | NA      | CXXC4   |
| PHLDA1  | -4.05016913 | 1.659226237 | 0         | NA | NA      | PHLDA1  |
| KIT     | -3.17697957 | 1.637540014 | 0         | NA | NA      | KIT     |
| UST     | -2.35119547 | 1.632375331 | 0         | NA | NA      | UST     |
| ASAM    | -2.13060341 | 1.626374035 | 0.1132952 | NA | ASAM    | ASAM    |
| SOCS2   | -2.38288631 | 1.626189776 | 0         | NA | NA      | SOCS2   |
| CBLN4   | -2.64785393 | 1.618761792 | 0         | NA | CBLN4   | CBLN4   |
| ADCYAP1 | -3.09707721 | 1.615928824 | 0         | NA | NA      | ADCYAP1 |
| THRB    | -2.1344228  | 1.601725202 | 0.1132952 | NA | NA      | THRB    |
| FAM5B   | -2.75243221 | 1.600873707 | 0         | NA | NA      | FAM5B   |
| SLIT2   | -3.08793809 | 1.565862657 | 0         | NA | SLIT2   | SLIT2   |
| TSPAN6  | -1.97172607 | 1.546995067 | 0.1920624 | NA | NA      | TSPAN6  |
| QPCT    | -1.69896847 | 1.522678029 | 0.5692172 | NA | NA      | QPCT    |
| ITGBL1  | -2.8160076  | 1.505764735 | 0         | NA | ITGBL1  | ITGBL1  |
| MID1IP1 | -3.31841086 | 1.502607182 | 0         | NA | MID1IP1 | MID1IP1 |
| CTGF    | -1.7315289  | 1.501443714 | 0.5692172 | NA | NA      | CTGF    |
| ITGA9   | -2.81551544 | 1.488179049 | 0         | NA | NA      | ITGA9   |
| C7orf36 | -2.15755103 | 1.485669325 | 0.1132952 | NA | NA      | C7orf36 |
| ADAMTS3 | -2.41327432 | 1.484830156 | 0         | NA | NA      | ADAMTS3 |
| TCF7L2  | -2.71959235 | 1.468822822 | 0         | NA | TCF7L2  | TCF7L2  |
| COL12A1 | -2.56005564 | 1.458176067 | 0         | NA | NA      | COL12A1 |
| SNCAIP  | -2.39993038 | 1.444568076 | 0         | NA | SNCAIP  | SNCAIP  |
| GAS1    | -2.82070171 | 1.439256816 | 0         | NA | NA      | GAS1    |
| RRAS2   | -2.21380586 | 1.436160734 | 0         | NA | NA      | RRAS2   |
| RFK     | -3.07661835 | 1.428068941 | 0         | NA | NA      | RFK     |
| H2AFY2  | -2.90931696 | 1.401067056 | 0         | NA | NA      | H2AFY2  |
| PLCB4   | -1.9883246  | 1.386326283 | 0.1920624 | NA | NA      | PLCB4   |
| CHN1    | -2.31384252 | 1.384545514 | 0         | NA | NA      | CHN1    |
| MN1     | -2.37409167 | 1.376844253 | 0         | NA | MN1     | MN1     |
| PRKG1   | -2.24761358 | 1.361509379 | 0         | NA | PRKG1   | PRKG1   |
| DIO2    | -1.68458127 | 1.345644949 | 0.5692172 | NA | NA      | DIO2    |
| PKP4    | -2.46392511 | 1.339819605 | 0         | NA | PKP4    | PKP4    |
| APBB2   | -1.93694713 | 1.337819274 | 0.1920624 | NA | NA      | APBB2   |
| SH3D19  | -2.18016659 | 1.337417312 | 0         | NA | NA      | SH3D19  |
| ZADH2   | -1.93886437 | 1.336059328 | 0.1920624 | NA | NA      | ZADH2   |
| SLC7A11 | -1.51258674 | 1.335705596 | 0.8841996 | NA | SLC7A11 | SLC7A11 |
| GRM7    | -1.99458151 | 1.333356807 | 0.1132952 | NA | GRM7    | GRM7    |
| QDPR    | -2.19795663 | 1.330727363 | 0         | NA | NA      | QDPR    |
| DPF3    | -1.99485721 | 1.322803272 | 0.1132952 | NA | NA      | DPF3    |
| PRKD1   | -1.92726666 | 1.322584174 | 0.1920624 | NA | NA      | PRKD1   |
| GRM5    | -2.08737967 | 1.322098237 | 0.1132952 | NA | NA      | GRM5    |



|          |             |             |           |    |          |          |
|----------|-------------|-------------|-----------|----|----------|----------|
| PBX1     | -1.73647124 | 1.321257503 | 0.5692172 | NA | PBX1     | PBX1     |
| ADRA2A   | -2.2026569  | 1.32088762  | 0         | NA | NA       | ADRA2A   |
| NINJ2    | -1.80627593 | 1.320586093 | 0.5692172 | NA | NA       | NINJ2    |
| KCNK2    | -1.6590451  | 1.315874513 | 0.5692172 | NA | NA       | KCNK2    |
| AJAP1    | -2.03845117 | 1.315715838 | 0.1132952 | NA | AJAP1    | AJAP1    |
| CRADD    | -1.62279567 | 1.302153136 | 0.8841996 | NA | NA       | CRADD    |
| RUNX2    | -1.6858028  | 1.284678259 | 0.5692172 | NA | NA       | RUNX2    |
| RSPO3    | -1.53076447 | 1.282867266 | 0.8841996 | NA | NA       | RSPO3    |
| E2F3     | -1.74676342 | 1.278940873 | 0.5692172 | NA | NA       | E2F3     |
| MYO1B    | -1.65357423 | 1.269053424 | 0.8841996 | NA | NA       | MYO1B    |
| ZNF703   | -1.72195868 | 1.264914497 | 0.5692172 | NA | ZNF703   | ZNF703   |
| MAOA     | -1.72301752 | 1.264390327 | 0.5692172 | NA | NA       | MAOA     |
| CACNA1D  | -1.80598597 | 1.264322789 | 0.5692172 | NA | NA       | CACNA1D  |
| WWP2     | -1.66442974 | 1.262947586 | 0.5692172 | NA | NA       | WWP2     |
| MYC      | -1.84922178 | 1.260900838 | 0.1920624 | NA | NA       | MYC      |
| DCTD     | -1.79166421 | 1.254213126 | 0.5692172 | NA | DCTD     | DCTD     |
| CA8      | -1.72634986 | 1.239795344 | 0.5692172 | NA | NA       | CA8      |
| ELAVL4   | -1.58841102 | 1.23423612  | 0.8841996 | NA | ELAVL4   | ELAVL4   |
| ZNF706   | -1.84899918 | 1.22405684  | 0.1920624 | NA | NA       | ZNF706   |
| ZNF395   | -1.59880805 | 1.21514445  | 0.8841996 | NA | NA       | ZNF395   |
| KCNF1    | -1.62789501 | 1.214471747 | 0.8841996 | NA | NA       | KCNF1    |
| ARL4C    | -1.70895532 | 1.213335346 | 0.5692172 | NA | NA       | ARL4C    |
| UNC5C    | 1.582604759 | 0.825391046 | 0.8841996 | NA | UNC5C    | UNC5C    |
| DGKH     | 1.670851083 | 0.817662921 | 0.5692172 | NA | NA       | DGKH     |
| RHOBTB1  | 1.520346451 | 0.806511173 | 0.8841996 | NA | NA       | RHOBTB1  |
| ITGA4    | 1.554255687 | 0.803971291 | 0.8841996 | NA | NA       | ITGA4    |
| CACNB2   | 1.758489199 | 0.803207464 | 0.5692172 | NA | NA       | CACNB2   |
| KBTBD8   | 1.572020284 | 0.799328082 | 0.8841996 | NA | NA       | KBTBD8   |
| SATB1    | 1.865850608 | 0.798173064 | 0.1920624 | NA | SATB1    | SATB1    |
| TLN2     | 1.634174676 | 0.797965962 | 0.8841996 | NA | NA       | TLN2     |
| GRM3     | 1.796391511 | 0.795173215 | 0.5692172 | NA | NA       | GRM3     |
| AMIGO2   | 1.538916893 | 0.790467469 | 0.8841996 | NA | NA       | AMIGO2   |
| GPD2     | 1.594044077 | 0.789623285 | 0.8841996 | NA | NA       | GPD2     |
| DNAJC1   | 1.883652286 | 0.787195104 | 0.1920624 | NA | NA       | DNAJC1   |
| ATP2B1   | 1.710136306 | 0.786368648 | 0.5692172 | NA | ATP2B1   | ATP2B1   |
| AP1S2    | 2.177174512 | 0.781873197 | 0.1132952 | NA | NA       | AP1S2    |
| AMMECR1  | 1.789781392 | 0.779275819 | 0.5692172 | NA | NA       | AMMECR1  |
| NR4A3    | 2.057562608 | 0.775546131 | 0.1132952 | NA | NA       | NR4A3    |
| BRAF     | 1.606726902 | 0.773847676 | 0.8841996 | NA | NA       | BRAF     |
| DDHD1    | 1.642298817 | 0.769818565 | 0.8841996 | NA | DDHD1    | DDHD1    |
| IGSF21   | 1.819825649 | 0.764397197 | 0.1920624 | NA | NA       | IGSF21   |
| TRIM44   | 1.980988715 | 0.763210785 | 0.1920624 | NA | NA       | TRIM44   |
| HCN1     | 1.876834754 | 0.759545131 | 0.1920624 | NA | NA       | HCN1     |
| PFTK1    | 1.720018754 | 0.757570187 | 0.5692172 | NA | PFTK1    | PFTK1    |
| DPYD     | 1.91158004  | 0.757162176 | 0.1920624 | NA | NA       | DPYD     |
| PTPRZ1   | 2.110731279 | 0.756312617 | 0.1132952 | NA | NA       | PTPRZ1   |
| PAG1     | 1.992347617 | 0.753555654 | 0.1920624 | NA | NA       | PAG1     |
| RPS6KA3  | 2.039452923 | 0.748799368 | 0.1132952 | NA | NA       | RPS6KA3  |
| FAM84A   | 1.882711005 | 0.743572731 | 0.1920624 | NA | FAM84A   | FAM84A   |
| SLC44A5  | 1.508018492 | 0.740117703 | 0.8841996 | NA | NA       | SLC44A5  |
| ARHGAP15 | 2.095321106 | 0.736425741 | 0.1132952 | NA | ARHGAP15 | ARHGAP15 |
| STIM2    | 1.601732135 | 0.736379264 | 0.8841996 | NA | NA       | STIM2    |
| PHF17    | 1.940661664 | 0.735165164 | 0.1920624 | NA | NA       | PHF17    |
| NEDD4    | 2.135901336 | 0.73156625  | 0.1132952 | NA | NA       | NEDD4    |
| CDCA7    | 2.32970259  | 0.730819321 | 0         | NA | NA       | CDCA7    |
| ETV1     | 1.869400066 | 0.729205933 | 0.1920624 | NA | NA       | ETV1     |
| C18orf1  | 2.627212485 | 0.726582856 | 0         | NA | NA       | C18orf1  |

|         |             |             |           |    |        |         |
|---------|-------------|-------------|-----------|----|--------|---------|
| BCL2    | 1.626209371 | 0.724973607 | 0.8841996 | NA | NA     | BCL2    |
| OMG     | 2.048961701 | 0.722212659 | 0.1132952 | NA | NA     | OMG     |
| COMMD2  | 2.67383655  | 0.720154885 | 0         | NA | NA     | COMMD2  |
| RFC3    | 2.091418981 | 0.715670472 | 0.1132952 | NA | NA     | RFC3    |
| FOXP1   | 2.573537464 | 0.714898217 | 0         | NA | FOXP1  | FOXP1   |
| FBXL17  | 1.890691069 | 0.714815869 | 0.1920624 | NA | NA     | FBXL17  |
| MGST1   | 1.860475221 | 0.701691591 | 0.1920624 | NA | NA     | MGST1   |
| SEZ6L   | 2.383782992 | 0.700835855 | 0         | NA | NA     | SEZ6L   |
| VRK2    | 1.671637439 | 0.689973897 | 0.5692172 | NA | VRK2   | VRK2    |
| ANK2    | 1.980579316 | 0.689171439 | 0.1920624 | NA | NA     | ANK2    |
| MAN2A1  | 1.735773326 | 0.688175588 | 0.5692172 | NA | NA     | MAN2A1  |
| GPAM    | 2.140470994 | 0.686996974 | 0.1132952 | NA | GPAM   | GPAM    |
| MOCS2   | 2.692411446 | 0.681645694 | 0         | NA | MOCS2  | MOCS2   |
| PAPPA2  | 3.35479031  | 0.678214016 | 0         | NA | NA     | PAPPA2  |
| CAMK4   | 2.598144006 | 0.673869172 | 0         | NA | NA     | CAMK4   |
| PDGFD   | 2.180255964 | 0.672588258 | 0.1132952 | NA | NA     | PDGFD   |
| UFM1    | 2.580881702 | 0.671223127 | 0         | NA | NA     | UFM1    |
| FRZB    | 2.87648549  | 0.666397665 | 0         | NA | NA     | FRZB    |
| SATB2   | 2.013867357 | 0.665230402 | 0.1132952 | NA | NA     | SATB2   |
| PDZRN3  | 2.399581709 | 0.662704991 | 0         | NA | PDZRN3 | PDZRN3  |
| NCOA2   | 2.324436097 | 0.655431563 | 0         | NA | NA     | NCOA2   |
| KCNJ2   | 1.894681369 | 0.651676841 | 0.1920624 | NA | NA     | KCNJ2   |
| DACT1   | 3.761208821 | 0.651434098 | 0         | NA | NA     | DACT1   |
| PTDSS1  | 3.51016526  | 0.65010501  | 0         | NA | NA     | PTDSS1  |
| CPNE4   | 2.235536593 | 0.649730283 | 0         | NA | NA     | CPNE4   |
| B3GALT2 | 3.186066515 | 0.643552774 | 0         | NA | NA     | B3GALT2 |
| NTNG1   | 2.56015907  | 0.6424647   | 0         | NA | NTNG1  | NTNG1   |
| SYNPR   | 2.211211773 | 0.6402151   | 0         | NA | SYNPR  | SYNPR   |
| LRRN3   | 3.792313283 | 0.62994277  | 0         | NA | NA     | LRRN3   |
| PLEKHH2 | 2.707449053 | 0.600841423 | 0         | NA | NA     | PLEKHH2 |
| ZNF238  | 2.839086702 | 0.596913    | 0         | NA | ZNF238 | ZNF238  |
| ANTXR2  | 3.917695399 | 0.583697192 | 0         | NA | ANTXR2 | ANTXR2  |
| TNFAIP8 | 2.545221104 | 0.577656874 | 0         | NA | NA     | TNFAIP8 |
| MET     | 3.694266312 | 0.562007528 | 0         | NA | NA     | MET     |
| MID1    | 3.336562507 | 0.560042328 | 0         | NA | MID1   | MID1    |
| NR3C1   | 3.988644401 | 0.55590161  | 0         | NA | NA     | NR3C1   |
| INHBA   | 3.850344657 | 0.535772384 | 0         | NA | NA     | INHBA   |
| KCNT2   | 2.308815908 | 0.535764159 | 0         | NA | NA     | KCNT2   |
| LDLRAD3 | 4.033439074 | 0.510085712 | 0         | NA | NA     | LDLRAD3 |
| GRB14   | 2.572872656 | 0.493036094 | 0         | NA | NA     | GRB14   |
| GPR22   | 3.324830791 | 0.478356979 | 0         | NA | NA     | GPR22   |
| PLCXD3  | 4.26694021  | 0.476284155 | 0         | NA | NA     | PLCXD3  |
| RSPO2   | 4.472734211 | 0.456294973 | 0         | NA | NA     | RSPO2   |
| MPP6    | 2.827116918 | 0.455774816 | 0         | NA | NA     | MPP6    |
| DGKI    | 2.8821568   | 0.445093854 | 0         | NA | NA     | DGKI    |
| ST6GAL2 | 4.531853789 | 0.443982207 | 0         | NA | NA     | ST6GAL2 |
| LGI1    | 5.01261104  | 0.4257431   | 0         | NA | NA     | LGI1    |
| PROK2   | 3.992329864 | 0.403362522 | 0         | NA | NA     | PROK2   |
| DACH2   | 5.39837332  | 0.393896261 | 0         | NA | NA     | DACH2   |
| AKT3    | 5.224519542 | 0.382303266 | 0         | NA | NA     | AKT3    |
| TGFB2   | 5.287867211 | 0.380547566 | 0         | NA | NA     | TGFB2   |
| TLE1    | 9.233379941 | 0.333319215 | 0         | NA | NA     | TLE1    |
| NR4A2   | 5.372879604 | 0.310340327 | 0         | NA | NR4A2  | NR4A2   |
| THBS1   | 5.220709261 | 0.278367583 | 0         | NA | NA     | THBS1   |
| NPY     | 10.48770135 | 0.152609434 | 0         | NA | NA     | NPY     |
| PCSK2   | 11.20597583 | 0.125898457 | 0         | NA | NA     | PCSK2   |

## maCNS only PFO vs PT q<0.01

| SYMBOL     | PFOvsPT.d   | PFOvsPT.FC  | PFOvsPT.q | haCNS | caCNS | maCNS      |
|------------|-------------|-------------|-----------|-------|-------|------------|
| FSTL5      | -9.13405901 | 5.144152677 | 0         | NA    | NA    | FSTL5      |
| CBLN1      | -7.70411465 | 4.807194815 | 0         | NA    | NA    | CBLN1      |
| BDNF       | -6.02848348 | 4.730594258 | 0         | NA    | NA    | BDNF       |
| ZNF423     | -6.90224806 | 4.597465111 | 0         | NA    | NA    | ZNF423     |
| PTX3       | -5.00633748 | 2.692349177 | 0         | NA    | NA    | PTX3       |
| ST6GALNAC5 | -6.09921617 | 2.366577756 | 0         | NA    | NA    | ST6GALNAC5 |
| MC4R       | -2.74483075 | 2.077390683 | 0         | NA    | NA    | MC4R       |
| CYP26A1    | -2.91046367 | 2.070475578 | 0         | NA    | NA    | CYP26A1    |
| LRRC3B     | -4.8019253  | 1.974090641 | 0         | NA    | NA    | LRRC3B     |
| PLK2       | -4.18086128 | 1.840616327 | 0         | NA    | NA    | PLK2       |
| KCNQ5      | -3.4225801  | 1.815481633 | 0         | NA    | NA    | KCNQ5      |
| NEBL       | -3.95962297 | 1.814775522 | 0         | NA    | NA    | NEBL       |
| RPH3A      | -1.83743736 | 1.750384294 | 0.1920624 | NA    | NA    | RPH3A      |
| BAMBI      | -2.54868324 | 1.746195742 | 0         | NA    | NA    | BAMBI      |
| TNFAIP3    | -1.74599811 | 1.72654034  | 0.5692172 | NA    | NA    | TNFAIP3    |
| NRIP1      | -3.2856362  | 1.715123759 | 0         | NA    | NA    | NRIP1      |
| CDH12      | -3.09316342 | 1.701936008 | 0         | NA    | NA    | CDH12      |
| CXXC4      | -3.9002226  | 1.683449791 | 0         | NA    | NA    | CXXC4      |
| PHLDA1     | -4.05016913 | 1.659226237 | 0         | NA    | NA    | PHLDA1     |
| KIT        | -3.17697957 | 1.637540014 | 0         | NA    | NA    | KIT        |
| UST        | -2.35119547 | 1.632375331 | 0         | NA    | NA    | UST        |
| SOCS2      | -2.38288631 | 1.626189776 | 0         | NA    | NA    | SOCS2      |
| ADCYAP1    | -3.09707721 | 1.615928824 | 0         | NA    | NA    | ADCYAP1    |
| THRB       | -2.1344228  | 1.601725202 | 0.1132952 | NA    | NA    | THRB       |
| FAM5B      | -2.75243221 | 1.600873707 | 0         | NA    | NA    | FAM5B      |
| TSPAN6     | -1.97172607 | 1.546995067 | 0.1920624 | NA    | NA    | TSPAN6     |
| QPCT       | -1.69896847 | 1.522678029 | 0.5692172 | NA    | NA    | QPCT       |
| CTGF       | -1.7315289  | 1.501443714 | 0.5692172 | NA    | NA    | CTGF       |
| ITGA9      | -2.81551544 | 1.488179049 | 0         | NA    | NA    | ITGA9      |
| C7orf36    | -2.15755103 | 1.485669325 | 0.1132952 | NA    | NA    | C7orf36    |
| ADAMTS3    | -2.41327432 | 1.484830156 | 0         | NA    | NA    | ADAMTS3    |
| COL12A1    | -2.56005564 | 1.458176067 | 0         | NA    | NA    | COL12A1    |
| GAS1       | -2.82070171 | 1.439256816 | 0         | NA    | NA    | GAS1       |
| RRAS2      | -2.21380586 | 1.436160734 | 0         | NA    | NA    | RRAS2      |
| RFK        | -3.07661835 | 1.428068941 | 0         | NA    | NA    | RFK        |
| H2AFY2     | -2.90931696 | 1.401067056 | 0         | NA    | NA    | H2AFY2     |
| PLCB4      | -1.9883246  | 1.386326283 | 0.1920624 | NA    | NA    | PLCB4      |
| CHN1       | -2.31384252 | 1.384545514 | 0         | NA    | NA    | CHN1       |
| DIO2       | -1.68458127 | 1.345644949 | 0.5692172 | NA    | NA    | DIO2       |
| APBB2      | -1.93694713 | 1.337819274 | 0.1920624 | NA    | NA    | APBB2      |
| SH3D19     | -2.18016659 | 1.337417312 | 0         | NA    | NA    | SH3D19     |
| ZADH2      | -1.93886437 | 1.336059328 | 0.1920624 | NA    | NA    | ZADH2      |
| QDPR       | -2.19795663 | 1.330727363 | 0         | NA    | NA    | QDPR       |
| DPF3       | -1.99485721 | 1.322803272 | 0.1132952 | NA    | NA    | DPF3       |
| PRKD1      | -1.92726666 | 1.322584174 | 0.1920624 | NA    | NA    | PRKD1      |
| GRM5       | -2.08737967 | 1.322098237 | 0.1132952 | NA    | NA    | GRM5       |
| ADRA2A     | -2.2026569  | 1.32088762  | 0         | NA    | NA    | ADRA2A     |

|         |             |             |           |    |    |         |
|---------|-------------|-------------|-----------|----|----|---------|
| NINJ2   | -1.80627593 | 1.320586093 | 0.5692172 | NA | NA | NINJ2   |
| KCNK2   | -1.6590451  | 1.315874513 | 0.5692172 | NA | NA | KCNK2   |
| CRADD   | -1.62279567 | 1.302153136 | 0.8841996 | NA | NA | CRADD   |
| RUNX2   | -1.6858028  | 1.284678259 | 0.5692172 | NA | NA | RUNX2   |
| RSPO3   | -1.53076447 | 1.282867266 | 0.8841996 | NA | NA | RSPO3   |
| E2F3    | -1.74676342 | 1.278940873 | 0.5692172 | NA | NA | E2F3    |
| MYO1B   | -1.65357423 | 1.269053424 | 0.8841996 | NA | NA | MYO1B   |
| MAOA    | -1.72301752 | 1.264390327 | 0.5692172 | NA | NA | MAOA    |
| CACNA1D | -1.80598597 | 1.264322789 | 0.5692172 | NA | NA | CACNA1D |
| WWP2    | -1.66442974 | 1.262947586 | 0.5692172 | NA | NA | WWP2    |
| MYC     | -1.84922178 | 1.260900838 | 0.1920624 | NA | NA | MYC     |
| CA8     | -1.72634986 | 1.239795344 | 0.5692172 | NA | NA | CA8     |
| ZNF706  | -1.84899918 | 1.22405684  | 0.1920624 | NA | NA | ZNF706  |
| ZNF395  | -1.59880805 | 1.21514445  | 0.8841996 | NA | NA | ZNF395  |
| KCNF1   | -1.62789501 | 1.214471747 | 0.8841996 | NA | NA | KCNF1   |
| ARL4C   | -1.70895532 | 1.213335346 | 0.5692172 | NA | NA | ARL4C   |
| DGKH    | 1.670851083 | 0.817662921 | 0.5692172 | NA | NA | DGKH    |
| RHOBTB1 | 1.520346451 | 0.806511173 | 0.8841996 | NA | NA | RHOBTB1 |
| ITGA4   | 1.554255687 | 0.803971291 | 0.8841996 | NA | NA | ITGA4   |
| CACNB2  | 1.758489199 | 0.803207464 | 0.5692172 | NA | NA | CACNB2  |
| KBTBD8  | 1.572020284 | 0.799328082 | 0.8841996 | NA | NA | KBTBD8  |
| TLN2    | 1.634174676 | 0.797965962 | 0.8841996 | NA | NA | TLN2    |
| GRM3    | 1.796391511 | 0.795173215 | 0.5692172 | NA | NA | GRM3    |
| AMIGO2  | 1.538916893 | 0.790467469 | 0.8841996 | NA | NA | AMIGO2  |
| GPD2    | 1.594044077 | 0.789623285 | 0.8841996 | NA | NA | GPD2    |
| DNAJC1  | 1.883652286 | 0.787195104 | 0.1920624 | NA | NA | DNAJC1  |
| AP1S2   | 2.177174512 | 0.781873197 | 0.1132952 | NA | NA | AP1S2   |
| AMMECR1 | 1.789781392 | 0.779275819 | 0.5692172 | NA | NA | AMMECR1 |
| NR4A3   | 2.057562608 | 0.775546131 | 0.1132952 | NA | NA | NR4A3   |
| BRAF    | 1.606726902 | 0.773847676 | 0.8841996 | NA | NA | BRAF    |
| IGSF21  | 1.819825649 | 0.764397197 | 0.1920624 | NA | NA | IGSF21  |
| TRIM44  | 1.980988715 | 0.763210785 | 0.1920624 | NA | NA | TRIM44  |
| HCN1    | 1.876834754 | 0.759545131 | 0.1920624 | NA | NA | HCN1    |
| DPYD    | 1.91158004  | 0.757162176 | 0.1920624 | NA | NA | DPYD    |
| PTPRZ1  | 2.110731279 | 0.756312617 | 0.1132952 | NA | NA | PTPRZ1  |
| PAG1    | 1.992347617 | 0.753555654 | 0.1920624 | NA | NA | PAG1    |
| RPS6KA3 | 2.039452923 | 0.748799368 | 0.1132952 | NA | NA | RPS6KA3 |
| SLC44A5 | 1.508018492 | 0.740117703 | 0.8841996 | NA | NA | SLC44A5 |
| STIM2   | 1.601732135 | 0.736379264 | 0.8841996 | NA | NA | STIM2   |
| PHF17   | 1.940661664 | 0.735165164 | 0.1920624 | NA | NA | PHF17   |
| NEDD4   | 2.135901336 | 0.73156625  | 0.1132952 | NA | NA | NEDD4   |
| CDCA7   | 2.32970259  | 0.730819321 | 0         | NA | NA | CDCA7   |
| ETV1    | 1.869400066 | 0.729205933 | 0.1920624 | NA | NA | ETV1    |
| C18orf1 | 2.627212485 | 0.726582856 | 0         | NA | NA | C18orf1 |
| BCL2    | 1.626209371 | 0.724973607 | 0.8841996 | NA | NA | BCL2    |
| OMG     | 2.048961701 | 0.722212659 | 0.1132952 | NA | NA | OMG     |
| COMMD2  | 2.67383655  | 0.720154885 | 0         | NA | NA | COMMD2  |
| RFC3    | 2.091418981 | 0.715670472 | 0.1132952 | NA | NA | RFC3    |
| FBXL17  | 1.890691069 | 0.714815869 | 0.1920624 | NA | NA | FBXL17  |
| MGST1   | 1.860475221 | 0.701691591 | 0.1920624 | NA | NA | MGST1   |
| SEZ6L   | 2.383782992 | 0.700835855 | 0         | NA | NA | SEZ6L   |
| ANK2    | 1.980579316 | 0.689171439 | 0.1920624 | NA | NA | ANK2    |
| MAN2A1  | 1.735773326 | 0.688175588 | 0.5692172 | NA | NA | MAN2A1  |
| PAPPA2  | 3.35479031  | 0.678214016 | 0         | NA | NA | PAPPA2  |
| CAMK4   | 2.598144006 | 0.673869172 | 0         | NA | NA | CAMK4   |
| PDGFD   | 2.180255964 | 0.672588258 | 0.1132952 | NA | NA | PDGFD   |
| UFM1    | 2.580881702 | 0.671223127 | 0         | NA | NA | UFM1    |

|         |             |             |           |    |    |         |
|---------|-------------|-------------|-----------|----|----|---------|
| FRZB    | 2.87648549  | 0.666397665 | 0         | NA | NA | FRZB    |
| SATB2   | 2.013867357 | 0.665230402 | 0.1132952 | NA | NA | SATB2   |
| NCOA2   | 2.324436097 | 0.655431563 | 0         | NA | NA | NCOA2   |
| KCNJ2   | 1.894681369 | 0.651676841 | 0.1920624 | NA | NA | KCNJ2   |
| DACT1   | 3.761208821 | 0.651434098 | 0         | NA | NA | DACT1   |
| PTDSS1  | 3.51016526  | 0.65010501  | 0         | NA | NA | PTDSS1  |
| CPNE4   | 2.235536593 | 0.649730283 | 0         | NA | NA | CPNE4   |
| B3GALT2 | 3.186066515 | 0.643552774 | 0         | NA | NA | B3GALT2 |
| LRRN3   | 3.792313283 | 0.62994277  | 0         | NA | NA | LRRN3   |
| PLEKHH2 | 2.707449053 | 0.600841423 | 0         | NA | NA | PLEKHH2 |
| TNFAIP8 | 2.545221104 | 0.577656874 | 0         | NA | NA | TNFAIP8 |
| MET     | 3.694266312 | 0.562007528 | 0         | NA | NA | MET     |
| NR3C1   | 3.988644401 | 0.55590161  | 0         | NA | NA | NR3C1   |
| INHBA   | 3.850344657 | 0.535772384 | 0         | NA | NA | INHBA   |
| KCNT2   | 2.308815908 | 0.535764159 | 0         | NA | NA | KCNT2   |
| LDLRAD3 | 4.033439074 | 0.510085712 | 0         | NA | NA | LDLRAD3 |
| GRB14   | 2.572872656 | 0.493036094 | 0         | NA | NA | GRB14   |
| GPR22   | 3.324830791 | 0.478356979 | 0         | NA | NA | GPR22   |
| PLCXD3  | 4.26694021  | 0.476284155 | 0         | NA | NA | PLCXD3  |
| RSPO2   | 4.472734211 | 0.456294973 | 0         | NA | NA | RSPO2   |
| MPP6    | 2.827116918 | 0.455774816 | 0         | NA | NA | MPP6    |
| DGKI    | 2.8821568   | 0.445093854 | 0         | NA | NA | DGKI    |
| ST6GAL2 | 4.531853789 | 0.443982207 | 0         | NA | NA | ST6GAL2 |
| LGI1    | 5.01261104  | 0.4257431   | 0         | NA | NA | LGI1    |
| PROK2   | 3.992329864 | 0.403362522 | 0         | NA | NA | PROK2   |
| DACH2   | 5.39837332  | 0.393896261 | 0         | NA | NA | DACH2   |
| AKT3    | 5.224519542 | 0.382303266 | 0         | NA | NA | AKT3    |
| TGFB2   | 5.287867211 | 0.380547566 | 0         | NA | NA | TGFB2   |
| TLE1    | 9.233379941 | 0.333319215 | 0         | NA | NA | TLE1    |
| THBS1   | 5.220709261 | 0.278367583 | 0         | NA | NA | THBS1   |
| NPY     | 10.48770135 | 0.152609434 | 0         | NA | NA | NPY     |
| PCSK2   | 11.20597583 | 0.125898457 | 0         | NA | NA | PCSK2   |

### haCNS 17vs19 q<0.01

| SYMBOL  | 17vs19.d    | 17vs19.FC   | 17vs19.q  | haCNS   | caCNS   | maCNS   |
|---------|-------------|-------------|-----------|---------|---------|---------|
| GJA1    | -3.17337837 | 2.191557093 | 0         | GJA1    | GJA1    | NA      |
| PDGFRL  | -3.50868784 | 2.13452466  | 0         | PDGFRL  | NA      | NA      |
| CDKAL1  | -6.8380691  | 1.932350629 | 0         | CDKAL1  | NA      | CDKAL1  |
| GPC6    | -2.9574624  | 1.70632811  | 0         | GPC6    | NA      | GPC6    |
| CLSTN2  | -2.46368422 | 1.678856802 | 0.1540868 | CLSTN2  | CLSTN2  | CLSTN2  |
| PDGFC   | -4.43591912 | 1.580637285 | 0         | PDGFC   | PDGFC   | NA      |
| EFEMP1  | -2.26012455 | 1.512079005 | 0.1540868 | EFEMP1  | EFEMP1  | EFEMP1  |
| PLXNA2  | -1.97437948 | 1.490453198 | 0.520402  | PLXNA2  | PLXNA2  | PLXNA2  |
| MAN1A1  | -2.34859792 | 1.474033488 | 0.1540868 | MAN1A1  | MAN1A1  | MAN1A1  |
| ANXA2   | -1.99979244 | 1.453295433 | 0.520402  | ANXA2   | ANXA2   | NA      |
| SDPR    | -3.04083896 | 1.447760103 | 0         | SDPR    | SDPR    | SDPR    |
| TLE4    | -2.22090823 | 1.420751773 | 0.520402  | TLE4    | TLE4    | TLE4    |
| SLC16A7 | -2.11445294 | 1.419373195 | 0.520402  | SLC16A7 | SLC16A7 | SLC16A7 |
| PCSK5   | -3.0316199  | 1.397304819 | 0         | PCSK5   | NA      | NA      |
| LMO7    | -2.86362537 | 1.393641999 | 0         | LMO7    | LMO7    | LMO7    |
| MPDZ    | -3.80357657 | 1.388112978 | 0         | MPDZ    | MPDZ    | MPDZ    |
| LHFPL3  | -3.49938347 | 1.365308367 | 0         | LHFPL3  | NA      | NA      |
| NAV2    | -4.33146512 | 1.322265666 | 0         | NAV2    | NA      | NAV2    |
| PKN2    | -2.50864858 | 1.301000047 | 0.1540868 | PKN2    | PKN2    | PKN2    |

|         |             |             |           |         |        |        |
|---------|-------------|-------------|-----------|---------|--------|--------|
| CDH5    | -2.99957549 | 1.29949249  | 0         | CDH5    | NA     | NA     |
| TXNL1   | -1.95194037 | 1.295710276 | 0.520402  | TXNL1   | NA     | TXNL1  |
| PREP    | -1.98403198 | 1.275789004 | 0.520402  | PREP    | NA     | PREP   |
| TWISTNB | -1.95938135 | 1.238987049 | 0.520402  | TWISTNB | NA     | NA     |
| HS3ST4  | -1.88909404 | 1.237218832 | 0.520402  | HS3ST4  | HS3ST4 | HS3ST4 |
| MAP3K7  | -2.31255986 | 1.236699116 | 0.1540868 | MAP3K7  | MAP3K7 | MAP3K7 |
| PSAT1   | -2.31918136 | 1.227550292 | 0.1540868 | PSAT1   | PSAT1  | PSAT1  |
| CD47    | -1.97752486 | 1.212944821 | 0.520402  | CD47    | NA     | CD47   |
| ADPGK   | -2.07538358 | 1.211264074 | 0.520402  | ADPGK   | NA     | ADPGK  |
| MTERF   | -2.19888817 | 1.205433619 | 0.520402  | MTERF   | NA     | MTERF  |
| HCCS    | -2.28285887 | 1.20536856  | 0.1540868 | HCCS    | NA     | NA     |
| VRK1    | -2.02209067 | 1.195584346 | 0.520402  | VRK1    | NA     | VRK1   |
| ZFP90   | -1.94156111 | 1.17520105  | 0.520402  | ZFP90   | NA     | NA     |
| P2RY10  | 2.172263829 | 0.859254145 | 0.520402  | P2RY10  | NA     | NA     |
| PAX1    | 2.365958635 | 0.824003886 | 0.520402  | PAX1    | NA     | NA     |
| TM7SF4  | 2.620467402 | 0.771725549 | 0.1540868 | TM7SF4  | NA     | NA     |
| PNOC    | 2.573718838 | 0.755997961 | 0.1540868 | PNOC    | NA     | NA     |
| PCDH8   | 2.407177097 | 0.715150483 | 0.520402  | PCDH8   | NA     | PCDH8  |
| SOX21   | 3.53743389  | 0.651630457 | 0         | SOX21   | NA     | SOX21  |

### **haCNS-caCNS 17vs19 q<0.01**

| <b>SYMBOL</b> | <b>17vs19.d</b> | <b>17vs19.FC</b> | <b>17vs19.q</b> | <b>haCNS</b> | <b>caCNS</b> | <b>maCNS</b> |
|---------------|-----------------|------------------|-----------------|--------------|--------------|--------------|
| PDGFRL        | -3.50868784     | 2.13452466       | 0               | PDGFRL       | NA           | NA           |
| CDKAL1        | -6.8380691      | 1.932350629      | 0               | CDKAL1       | NA           | CDKAL1       |
| GPC6          | -2.9574624      | 1.70632811       | 0               | GPC6         | NA           | GPC6         |
| PCSK5         | -3.0316199      | 1.397304819      | 0               | PCSK5        | NA           | NA           |
| LHFPL3        | -3.49938347     | 1.365308367      | 0               | LHFPL3       | NA           | NA           |
| NAV2          | -4.33146512     | 1.322265666      | 0               | NAV2         | NA           | NAV2         |
| CDH5          | -2.99957549     | 1.29949249       | 0               | CDH5         | NA           | NA           |
| TXNL1         | -1.95194037     | 1.295710276      | 0.520402        | TXNL1        | NA           | TXNL1        |
| PREP          | -1.98403198     | 1.275789004      | 0.520402        | PREP         | NA           | PREP         |
| TWISTNB       | -1.95938135     | 1.238987049      | 0.520402        | TWISTNB      | NA           | NA           |
| CD47          | -1.97752486     | 1.212944821      | 0.520402        | CD47         | NA           | CD47         |
| ADPGK         | -2.07538358     | 1.211264074      | 0.520402        | ADPGK        | NA           | ADPGK        |
| MTERF         | -2.19888817     | 1.205433619      | 0.520402        | MTERF        | NA           | MTERF        |
| HCCS          | -2.28285887     | 1.20536856       | 0.1540868       | HCCS         | NA           | NA           |
| VRK1          | -2.02209067     | 1.195584346      | 0.520402        | VRK1         | NA           | VRK1         |
| ZFP90         | -1.94156111     | 1.17520105       | 0.520402        | ZFP90        | NA           | NA           |
| P2RY10        | 2.172263829     | 0.859254145      | 0.520402        | P2RY10       | NA           | NA           |
| PAX1          | 2.365958635     | 0.824003886      | 0.520402        | PAX1         | NA           | NA           |
| TM7SF4        | 2.620467402     | 0.771725549      | 0.1540868       | TM7SF4       | NA           | NA           |
| PNOC          | 2.573718838     | 0.755997961      | 0.1540868       | PNOC         | NA           | NA           |
| PCDH8         | 2.407177097     | 0.715150483      | 0.520402        | PCDH8        | NA           | PCDH8        |
| SOX21         | 3.53743389      | 0.651630457      | 0               | SOX21        | NA           | SOX21        |

### **haCNS only 17vs19 q<0.01**

| <b>SYMBOL</b> | <b>17vs19.d</b> | <b>17vs19.FC</b> | <b>17vs19.q</b> | <b>haCNS</b> | <b>caCNS</b> | <b>maCNS</b> |
|---------------|-----------------|------------------|-----------------|--------------|--------------|--------------|
| PDGFRL        | -3.50868784     | 2.13452466       | 0               | PDGFRL       | NA           | NA           |
| CDH5          | -2.99957549     | 1.29949249       | 0               | CDH5         | NA           | NA           |

|         |             |             |           |         |    |    |
|---------|-------------|-------------|-----------|---------|----|----|
| LHFPL3  | -3.49938347 | 1.365308367 | 0         | LHFPL3  | NA | NA |
| PCSK5   | -3.0316199  | 1.397304819 | 0         | PCSK5   | NA | NA |
| HCCS    | -2.28285887 | 1.20536856  | 0.1540868 | HCCS    | NA | NA |
| PNOC    | 2.573718838 | 0.755997961 | 0.1540868 | PNOC    | NA | NA |
| TM7SF4  | 2.620467402 | 0.771725549 | 0.1540868 | TM7SF4  | NA | NA |
| ZFP90   | -1.94156111 | 1.17520105  | 0.520402  | ZFP90   | NA | NA |
| P2RY10  | 2.172263829 | 0.859254145 | 0.520402  | P2RY10  | NA | NA |
| PAX1    | 2.365958635 | 0.824003886 | 0.520402  | PAX1    | NA | NA |
| TWISTNB | -1.95938135 | 1.238987049 | 0.520402  | TWISTNB | NA | NA |

### **caCNS 17vs19 q<0.01**

| <b>SYMBOL</b> | <b>17vs19.d</b> | <b>17vs19.FC</b> | <b>17vs19.q</b> | <b>haCNS</b> | <b>caCNS</b> | <b>maCNS</b> |
|---------------|-----------------|------------------|-----------------|--------------|--------------|--------------|
| GJA1          | -3.17337837     | 2.191557093      | 0               | GJA1         | GJA1         | NA           |
| CLSTN2        | -2.46368422     | 1.678856802      | 0.1540868       | CLSTN2       | CLSTN2       | CLSTN2       |
| PDGFC         | -4.43591912     | 1.580637285      | 0               | PDGFC        | PDGFC        | NA           |
| ZFPM2         | -4.55035079     | 1.527789009      | 0               | NA           | ZFPM2        | ZFPM2        |
| EFEMP1        | -2.26012455     | 1.512079005      | 0.1540868       | EFEMP1       | EFEMP1       | EFEMP1       |
| EYA1          | -3.22782472     | 1.505148939      | 0               | NA           | EYA1         | EYA1         |
| PLXNA2        | -1.97437948     | 1.490453198      | 0.520402        | PLXNA2       | PLXNA2       | PLXNA2       |
| MAN1A1        | -2.34859792     | 1.474033488      | 0.1540868       | MAN1A1       | MAN1A1       | MAN1A1       |
| ANXA2         | -1.99979244     | 1.453295433      | 0.520402        | ANXA2        | ANXA2        | NA           |
| SDPR          | -3.04083896     | 1.447760103      | 0               | SDPR         | SDPR         | SDPR         |
| DAD1          | -3.40908343     | 1.424753181      | 0               | NA           | DAD1         | NA           |
| TLE4          | -2.22090823     | 1.420751773      | 0.520402        | TLE4         | TLE4         | TLE4         |
| SLC16A7       | -2.11445294     | 1.419373195      | 0.520402        | SLC16A7      | SLC16A7      | SLC16A7      |
| LMO7          | -2.86362537     | 1.393641999      | 0               | LMO7         | LMO7         | LMO7         |
| MPDZ          | -3.80357657     | 1.388112978      | 0               | MPDZ         | MPDZ         | MPDZ         |
| HHAT          | -2.6642639      | 1.37203725       | 0.1540868       | NA           | HHAT         | NA           |
| RBMS1         | -2.12815335     | 1.345814478      | 0.520402        | NA           | RBMS1        | RBMS1        |
| EXT1          | -2.79394171     | 1.335902263      | 0               | NA           | EXT1         | EXT1         |
| CRBN          | -4.49368722     | 1.319828382      | 0               | NA           | CRBN         | NA           |
| ADK           | -2.13027331     | 1.319249551      | 0.520402        | NA           | ADK          | ADK          |
| SLC35B3       | -2.29595733     | 1.312717866      | 0.1540868       | NA           | SLC35B3      | SLC35B3      |
| PKN2          | -2.50864858     | 1.301000047      | 0.1540868       | PKN2         | PKN2         | PKN2         |
| KCTD12        | -1.90459309     | 1.283296933      | 0.520402        | NA           | KCTD12       | NA           |
| CTTNBP2       | -2.18193564     | 1.254580236      | 0.520402        | NA           | CTTNBP2      | NA           |
| STX18         | -2.37313517     | 1.249432252      | 0.1540868       | NA           | STX18        | NA           |
| TNIK          | -1.92592989     | 1.240527733      | 0.520402        | NA           | TNIK         | TNIK         |
| HS3ST4        | -1.88909404     | 1.237218832      | 0.520402        | HS3ST4       | HS3ST4       | HS3ST4       |
| MAP3K7        | -2.31255986     | 1.236699116      | 0.1540868       | MAP3K7       | MAP3K7       | MAP3K7       |
| PSAT1         | -2.31918136     | 1.227550292      | 0.1540868       | PSAT1        | PSAT1        | PSAT1        |
| SHFM1         | -2.02317348     | 1.217277413      | 0.520402        | NA           | SHFM1        | SHFM1        |
| HIBADH        | -1.98143835     | 1.211610456      | 0.520402        | NA           | HIBADH       | HIBADH       |
| MCPH1         | -2.16212023     | 1.181917204      | 0.520402        | NA           | MCPH1        | MCPH1        |
| RBMS3         | -2.53824342     | 1.174347585      | 0.1540868       | NA           | RBMS3        | RBMS3        |
| WARS2         | -1.98825236     | 1.165129453      | 0.520402        | NA           | WARS2        | NA           |
| PFKP          | 2.154326983     | 0.80612248       | 0.520402        | NA           | PFKP         | PFKP         |
| CRB1          | 2.721836542     | 0.778340406      | 0.1540868       | NA           | CRB1         | CRB1         |
| FAM19A2       | 3.079103642     | 0.755605038      | 0               | NA           | FAM19A2      | FAM19A2      |
| FLJ32063      | 3.421259059     | 0.747785344      | 0               | NA           | FLJ32063     | FLJ32063     |
| DNAH7         | 2.419109983     | 0.707731731      | 0.520402        | NA           | DNAH7        | DNAH7        |
| GABRB2        | 2.371876049     | 0.688095369      | 0.520402        | NA           | GABRB2       | NA           |

### **caCNS-haCNS 17vs19 q<0.01**

| <b>SYMBOL</b> | <b>17vs19.d</b> | <b>17vs19.FC</b> | <b>17vs19.q</b> | <b>haCNS</b> | <b>caCNS</b> | <b>maCNS</b> |
|---------------|-----------------|------------------|-----------------|--------------|--------------|--------------|
| ZFPM2         | -4.55035079     | 1.527789009      | 0               | NA           | ZFPM2        | ZFPM2        |
| EYA1          | -3.22782472     | 1.505148939      | 0               | NA           | EYA1         | EYA1         |
| DAD1          | -3.40908343     | 1.424753181      | 0               | NA           | DAD1         | NA           |
| HHAT          | -2.6642639      | 1.37203725       | 0.1540868       | NA           | HHAT         | NA           |
| RBMS1         | -2.12815335     | 1.345814478      | 0.520402        | NA           | RBMS1        | RBMS1        |
| EXT1          | -2.79394171     | 1.335902263      | 0               | NA           | EXT1         | EXT1         |
| CRBN          | -4.49368722     | 1.319828382      | 0               | NA           | CRBN         | NA           |
| ADK           | -2.13027331     | 1.319249551      | 0.520402        | NA           | ADK          | ADK          |
| SLC35B3       | -2.29595733     | 1.312717866      | 0.1540868       | NA           | SLC35B3      | SLC35B3      |
| KCTD12        | -1.90459309     | 1.283296933      | 0.520402        | NA           | KCTD12       | NA           |
| CTTNBP2       | -2.18193564     | 1.254580236      | 0.520402        | NA           | CTTNBP2      | NA           |
| STX18         | -2.37313517     | 1.249432252      | 0.1540868       | NA           | STX18        | NA           |
| TNIK          | -1.92592989     | 1.240527733      | 0.520402        | NA           | TNIK         | TNIK         |
| SHFM1         | -2.02317348     | 1.217277413      | 0.520402        | NA           | SHFM1        | SHFM1        |
| HIBADH        | -1.98143835     | 1.211610456      | 0.520402        | NA           | HIBADH       | HIBADH       |
| MCPH1         | -2.16212023     | 1.181917204      | 0.520402        | NA           | MCPH1        | MCPH1        |
| RBMS3         | -2.53824342     | 1.174347585      | 0.1540868       | NA           | RBMS3        | RBMS3        |
| WARS2         | -1.98825236     | 1.165129453      | 0.520402        | NA           | WARS2        | NA           |
| PFKP          | 2.154326983     | 0.80612248       | 0.520402        | NA           | PFKP         | PFKP         |
| CRB1          | 2.721836542     | 0.778340406      | 0.1540868       | NA           | CRB1         | CRB1         |
| FAM19A2       | 3.079103642     | 0.755605038      | 0               | NA           | FAM19A2      | FAM19A2      |
| FLJ32063      | 3.421259059     | 0.747785344      | 0               | NA           | FLJ32063     | FLJ32063     |
| DNAH7         | 2.419109983     | 0.707731731      | 0.520402        | NA           | DNAH7        | DNAH7        |
| GABRB2        | 2.371876049     | 0.688095369      | 0.520402        | NA           | GABRB2       | NA           |

### **caCNS only 17vs19 q<0.01**

| <b>SYMBOL</b> | <b>17vs19.d</b> | <b>17vs19.FC</b> | <b>17vs19.q</b> | <b>haCNS</b> | <b>caCNS</b> | <b>maCNS</b> |
|---------------|-----------------|------------------|-----------------|--------------|--------------|--------------|
| DAD1          | -3.40908343     | 1.424753181      | 0               | NA           | DAD1         | NA           |
| CRBN          | -4.49368722     | 1.319828382      | 0               | NA           | CRBN         | NA           |
| HHAT          | -2.6642639      | 1.37203725       | 0.1540868       | NA           | HHAT         | NA           |
| STX18         | -2.37313517     | 1.249432252      | 0.1540868       | NA           | STX18        | NA           |
| GABRB2        | 2.371876049     | 0.688095369      | 0.520402        | NA           | GABRB2       | NA           |
| KCTD12        | -1.90459309     | 1.283296933      | 0.520402        | NA           | KCTD12       | NA           |
| WARS2         | -1.98825236     | 1.165129453      | 0.520402        | NA           | WARS2        | NA           |
| CTTNBP2       | -2.18193564     | 1.254580236      | 0.520402        | NA           | CTTNBP2      | NA           |

### **maCNS 17vs19 q<0.01**

| <b>SYMBOL</b> | <b>17vs19.d</b> | <b>17vs19.FC</b> | <b>17vs19.q</b> | <b>haCNS</b> | <b>caCNS</b> | <b>maCNS</b> |
|---------------|-----------------|------------------|-----------------|--------------|--------------|--------------|
| FZD3          | -4.97298279     | 2.702230523      | 0               | NA           | NA           | FZD3         |
| CDKAL1        | -6.8380691      | 1.932350629      | 0               | CDKAL1       | NA           | CDKAL1       |
| GRIN2B        | -2.78934944     | 1.864057191      | 0               | NA           | NA           | GRIN2B       |



|           |             |             |           |         |         |           |
|-----------|-------------|-------------|-----------|---------|---------|-----------|
| RSRC1     | -3.56506296 | 1.713336184 | 0         | NA      | NA      | RSRC1     |
| GPC6      | -2.9574624  | 1.70632811  | 0         | GPC6    | NA      | GPC6      |
| DKK1      | -3.65002751 | 1.683887969 | 0         | NA      | NA      | DKK1      |
| CLSTN2    | -2.46368422 | 1.678856802 | 0.1540868 | CLSTN2  | CLSTN2  | CLSTN2    |
| DOCK7     | -5.76606227 | 1.628981586 | 0         | NA      | NA      | DOCK7     |
| ZNF644    | -2.5407901  | 1.554425864 | 0.1540868 | NA      | NA      | ZNF644    |
| DKK2      | -2.79721009 | 1.543479741 | 0         | NA      | NA      | DKK2      |
| COL1A2    | -2.52470031 | 1.537572268 | 0.1540868 | NA      | NA      | COL1A2    |
| TBX15     | -3.22463323 | 1.533015644 | 0         | NA      | NA      | TBX15     |
| ZFPM2     | -4.55035079 | 1.527789009 | 0         | NA      | ZFPM2   | ZFPM2     |
| EFEMP1    | -2.26012455 | 1.512079005 | 0.1540868 | EFEMP1  | EFEMP1  | EFEMP1    |
| EYA1      | -3.22782472 | 1.505148939 | 0         | NA      | EYA1    | EYA1      |
| BBX       | -2.72541303 | 1.503352785 | 0         | NA      | NA      | BBX       |
| PLXNA2    | -1.97437948 | 1.490453198 | 0.520402  | PLXNA2  | PLXNA2  | PLXNA2    |
| MAN1A1    | -2.34859792 | 1.474033488 | 0.1540868 | MAN1A1  | MAN1A1  | MAN1A1    |
| SDPR      | -3.04083896 | 1.447760103 | 0         | SDPR    | SDPR    | SDPR      |
| TOP1      | -2.58635713 | 1.421338755 | 0.1540868 | NA      | NA      | TOP1      |
| TLE4      | -2.22090823 | 1.420751773 | 0.520402  | TLE4    | TLE4    | TLE4      |
| SLC16A7   | -2.11445294 | 1.419373195 | 0.520402  | SLC16A7 | SLC16A7 | SLC16A7   |
| PEX7      | -2.83204478 | 1.415530499 | 0         | NA      | NA      | PEX7      |
| LMO7      | -2.86362537 | 1.393641999 | 0         | LMO7    | LMO7    | LMO7      |
| BCL11B    | -3.06436444 | 1.391389965 | 0         | NA      | NA      | BCL11B    |
| CBX5      | -2.34906748 | 1.389545675 | 0.1540868 | NA      | NA      | CBX5      |
| MPDZ      | -3.80357657 | 1.388112978 | 0         | MPDZ    | MPDZ    | MPDZ      |
| C20orf94  | -2.87595556 | 1.387615802 | 0         | NA      | NA      | C20orf94  |
| TWIST1    | -2.17847544 | 1.387156152 | 0.520402  | NA      | NA      | TWIST1    |
| C14orf101 | -3.32291015 | 1.386521163 | 0         | NA      | NA      | C14orf101 |
| SYT6      | -2.1545715  | 1.3776413   | 0.520402  | NA      | NA      | SYT6      |
| ZIC1      | -2.0479031  | 1.373878606 | 0.520402  | NA      | NA      | ZIC1      |
| ALDH1A2   | -2.91445951 | 1.370079363 | 0         | NA      | NA      | ALDH1A2   |
| GLCE      | -3.29791405 | 1.361077222 | 0         | NA      | NA      | GLCE      |
| ZNF673    | -2.82951419 | 1.350680326 | 0         | NA      | NA      | ZNF673    |
| FBN1      | -2.22232971 | 1.350007951 | 0.520402  | NA      | NA      | FBN1      |
| RBMS1     | -2.12815335 | 1.345814478 | 0.520402  | NA      | RBMS1   | RBMS1     |
| EIF2C3    | -2.04353922 | 1.342983542 | 0.520402  | NA      | NA      | EIF2C3    |
| EXT1      | -2.79394171 | 1.335902263 | 0         | NA      | EXT1    | EXT1      |
| C14orf118 | -2.35311208 | 1.330164075 | 0.1540868 | NA      | NA      | C14orf118 |
| ZNF281    | -3.44029224 | 1.328545073 | 0         | NA      | NA      | ZNF281    |
| NAV2      | -4.33146512 | 1.322265666 | 0         | NAV2    | NA      | NAV2      |
| ADAMTS5   | -2.55787551 | 1.321249272 | 0.1540868 | NA      | NA      | ADAMTS5   |
| ADK       | -2.13027331 | 1.319249551 | 0.520402  | NA      | ADK     | ADK       |
| SLC35B3   | -2.29595733 | 1.312717866 | 0.1540868 | NA      | SLC35B3 | SLC35B3   |
| KLF5      | -3.32459292 | 1.312042574 | 0         | NA      | NA      | KLF5      |
| FRMD6     | -2.21758141 | 1.302538678 | 0.520402  | NA      | NA      | FRMD6     |
| PKN2      | -2.50864858 | 1.301000047 | 0.1540868 | PKN2    | PKN2    | PKN2      |
| CASC3     | -2.66470508 | 1.300765107 | 0.1540868 | NA      | NA      | CASC3     |
| FZD10     | -2.03362973 | 1.299214783 | 0.520402  | NA      | NA      | FZD10     |
| TIMP3     | -2.08494387 | 1.296640498 | 0.520402  | NA      | NA      | TIMP3     |
| TFAM      | -2.21244877 | 1.295833643 | 0.520402  | NA      | NA      | TFAM      |
| TXNL1     | -1.95194037 | 1.295710276 | 0.520402  | TXNL1   | NA      | TXNL1     |
| BOC       | -2.80684746 | 1.276563183 | 0         | NA      | NA      | BOC       |
| PREP      | -1.98403198 | 1.275789004 | 0.520402  | PREP    | NA      | PREP      |
| CCDC28A   | -2.13096962 | 1.264175159 | 0.520402  | NA      | NA      | CCDC28A   |
| MMP16     | -1.99497007 | 1.259489116 | 0.520402  | NA      | NA      | MMP16     |
| CLCN3     | -2.07964964 | 1.255031196 | 0.520402  | NA      | NA      | CLCN3     |
| PEX5L     | -2.16408121 | 1.245397069 | 0.520402  | NA      | NA      | PEX5L     |
| TNIK      | -1.92592989 | 1.240527733 | 0.520402  | NA      | TNIK    | TNIK      |

|          |             |             |           |        |          |          |
|----------|-------------|-------------|-----------|--------|----------|----------|
| ZNF326   | -2.32096285 | 1.239165076 | 0.1540868 | NA     | NA       | ZNF326   |
| HS3ST4   | -1.88909404 | 1.237218832 | 0.520402  | HS3ST4 | HS3ST4   | HS3ST4   |
| MAP3K7   | -2.31255986 | 1.236699116 | 0.1540868 | MAP3K7 | MAP3K7   | MAP3K7   |
| PSAT1    | -2.31918136 | 1.227550292 | 0.1540868 | PSAT1  | PSAT1    | PSAT1    |
| SS18     | -1.96813576 | 1.226954949 | 0.520402  | NA     | NA       | SS18     |
| AKAP12   | -2.27860814 | 1.224420608 | 0.1540868 | NA     | NA       | AKAP12   |
| SAMD9    | -1.96276899 | 1.223845755 | 0.520402  | NA     | NA       | SAMD9    |
| SUMF1    | -2.10382774 | 1.219291023 | 0.520402  | NA     | NA       | SUMF1    |
| MPPED1   | -2.01198389 | 1.217516571 | 0.520402  | NA     | NA       | MPPED1   |
| SHFM1    | -2.02317348 | 1.217277413 | 0.520402  | NA     | SHFM1    | SHFM1    |
| C3orf17  | -1.91280258 | 1.213563178 | 0.520402  | NA     | NA       | C3orf17  |
| CD47     | -1.97752486 | 1.212944821 | 0.520402  | CD47   | NA       | CD47     |
| HIBADH   | -1.98143835 | 1.211610456 | 0.520402  | NA     | HIBADH   | HIBADH   |
| ADPGK    | -2.07538358 | 1.211264074 | 0.520402  | ADPGK  | NA       | ADPGK    |
| MTERF    | -2.19888817 | 1.205433619 | 0.520402  | MTERF  | NA       | MTERF    |
| VRK1     | -2.02209067 | 1.195584346 | 0.520402  | VRK1   | NA       | VRK1     |
| MAML3    | -2.2695581  | 1.182789139 | 0.1540868 | NA     | NA       | MAML3    |
| AHI1     | -1.9220662  | 1.182095369 | 0.520402  | NA     | NA       | AHI1     |
| MCPH1    | -2.16212023 | 1.181917204 | 0.520402  | NA     | MCPH1    | MCPH1    |
| RBMS3    | -2.53824342 | 1.174347585 | 0.1540868 | NA     | RBMS3    | RBMS3    |
| TSPAN3   | -1.90848538 | 1.122098293 | 0.520402  | NA     | NA       | TSPAN3   |
| SLC39A10 | 2.208794368 | 0.836722995 | 0.520402  | NA     | NA       | SLC39A10 |
| PFKP     | 2.154326983 | 0.80612248  | 0.520402  | NA     | PFKP     | PFKP     |
| CACNG2   | 2.453906731 | 0.790183967 | 0.520402  | NA     | NA       | CACNG2   |
| PITRM1   | 2.777443066 | 0.789302367 | 0.1540868 | NA     | NA       | PITRM1   |
| CHEK2    | 2.114178998 | 0.785876281 | 0.520402  | NA     | NA       | CHEK2    |
| CRB1     | 2.721836542 | 0.778340406 | 0.1540868 | NA     | CRB1     | CRB1     |
| PON1     | 2.083377541 | 0.777106183 | 0.520402  | NA     | NA       | PON1     |
| LMX1A    | 2.455077253 | 0.771723071 | 0.520402  | NA     | NA       | LMX1A    |
| FLJ46321 | 2.449140041 | 0.767112038 | 0.520402  | NA     | NA       | FLJ46321 |
| TFDP3    | 2.230751504 | 0.763275533 | 0.520402  | NA     | NA       | TFDP3    |
| RGS22    | 2.172300014 | 0.760066715 | 0.520402  | NA     | NA       | RGS22    |
| FAM19A2  | 3.079103642 | 0.755605038 | 0         | NA     | FAM19A2  | FAM19A2  |
| FLJ32063 | 3.421259059 | 0.747785344 | 0         | NA     | FLJ32063 | FLJ32063 |
| ATIC     | 2.099638565 | 0.745570268 | 0.520402  | NA     | NA       | ATIC     |
| WIT1     | 2.083036558 | 0.740352502 | 0.520402  | NA     | NA       | WIT1     |
| HSD11B2  | 2.292516661 | 0.72482175  | 0.520402  | NA     | NA       | HSD11B2  |
| MAS1     | 2.096200531 | 0.723824276 | 0.520402  | NA     | NA       | MAS1     |
| HDDC2    | 2.513864005 | 0.718404422 | 0.1540868 | NA     | NA       | HDDC2    |
| PCDH8    | 2.407177097 | 0.715150483 | 0.520402  | PCDH8  | NA       | PCDH8    |
| DNAH7    | 2.419109983 | 0.707731731 | 0.520402  | NA     | DNAH7    | DNAH7    |
| SOX21    | 3.53743389  | 0.651630457 | 0         | SOX21  | NA       | SOX21    |
| KCTD16   | 2.354394955 | 0.60252427  | 0.520402  | NA     | NA       | KCTD16   |
| BMPR1B   | 2.606890498 | 0.576279577 | 0.1540868 | NA     | NA       | BMPR1B   |
| TNNI3K   | 4.763428484 | 0.575831723 | 0         | NA     | NA       | TNNI3K   |

### **maCNS-haCNS 17vs19 q<0.01**

| <b>SYMBOL</b> | <b>17vs19.d</b> | <b>17vs19.FC</b> | <b>17vs19.q</b> | <b>haCNS</b> | <b>caCNS</b> | <b>maCNS</b> |
|---------------|-----------------|------------------|-----------------|--------------|--------------|--------------|
| FZD3          | -4.97298279     | 2.702230523      | 0               | NA           | NA           | FZD3         |
| GRIN2B        | -2.78934944     | 1.864057191      | 0               | NA           | NA           | GRIN2B       |
| RSRC1         | -3.56506296     | 1.713336184      | 0               | NA           | NA           | RSRC1        |
| DKK1          | -3.65002751     | 1.683887969      | 0               | NA           | NA           | DKK1         |
| DOCK7         | -5.76606227     | 1.628981586      | 0               | NA           | NA           | DOCK7        |

|           |             |             |           |    |         |           |
|-----------|-------------|-------------|-----------|----|---------|-----------|
| ZNF644    | -2.5407901  | 1.554425864 | 0.1540868 | NA | NA      | ZNF644    |
| DKK2      | -2.79721009 | 1.543479741 | 0         | NA | NA      | DKK2      |
| COL1A2    | -2.52470031 | 1.537572268 | 0.1540868 | NA | NA      | COL1A2    |
| TBX15     | -3.22463323 | 1.533015644 | 0         | NA | NA      | TBX15     |
| ZFPM2     | -4.55035079 | 1.527789009 | 0         | NA | ZFPM2   | ZFPM2     |
| EYA1      | -3.22782472 | 1.505148939 | 0         | NA | EYA1    | EYA1      |
| BBX       | -2.72541303 | 1.503352785 | 0         | NA | NA      | BBX       |
| TOP1      | -2.58635713 | 1.421338755 | 0.1540868 | NA | NA      | TOP1      |
| PEX7      | -2.83204478 | 1.415530499 | 0         | NA | NA      | PEX7      |
| BCL11B    | -3.06436444 | 1.391389965 | 0         | NA | NA      | BCL11B    |
| CBX5      | -2.34906748 | 1.389545675 | 0.1540868 | NA | NA      | CBX5      |
| C20orf94  | -2.87595556 | 1.387615802 | 0         | NA | NA      | C20orf94  |
| TWIST1    | -2.17847544 | 1.387156152 | 0.520402  | NA | NA      | TWIST1    |
| C14orf101 | -3.32291015 | 1.386521163 | 0         | NA | NA      | C14orf101 |
| SYT6      | -2.1545715  | 1.3776413   | 0.520402  | NA | NA      | SYT6      |
| ZIC1      | -2.0479031  | 1.373878606 | 0.520402  | NA | NA      | ZIC1      |
| ALDH1A2   | -2.91445951 | 1.370079363 | 0         | NA | NA      | ALDH1A2   |
| GLCE      | -3.29791405 | 1.361077222 | 0         | NA | NA      | GLCE      |
| ZNF673    | -2.82951419 | 1.350680326 | 0         | NA | NA      | ZNF673    |
| FBN1      | -2.22232971 | 1.350007951 | 0.520402  | NA | NA      | FBN1      |
| RBMS1     | -2.12815335 | 1.345814478 | 0.520402  | NA | RBMS1   | RBMS1     |
| EIF2C3    | -2.04353922 | 1.342983542 | 0.520402  | NA | NA      | EIF2C3    |
| EXT1      | -2.79394171 | 1.335902263 | 0         | NA | EXT1    | EXT1      |
| C14orf118 | -2.35311208 | 1.330164075 | 0.1540868 | NA | NA      | C14orf118 |
| ZNF281    | -3.44029224 | 1.328545073 | 0         | NA | NA      | ZNF281    |
| ADAMTS5   | -2.55787551 | 1.321249272 | 0.1540868 | NA | NA      | ADAMTS5   |
| ADK       | -2.13027331 | 1.319249551 | 0.520402  | NA | ADK     | ADK       |
| SLC35B3   | -2.29595733 | 1.312717866 | 0.1540868 | NA | SLC35B3 | SLC35B3   |
| KLF5      | -3.32459292 | 1.312042574 | 0         | NA | NA      | KLF5      |
| FRMD6     | -2.21758141 | 1.302538678 | 0.520402  | NA | NA      | FRMD6     |
| CASC3     | -2.66470508 | 1.300765107 | 0.1540868 | NA | NA      | CASC3     |
| FZD10     | -2.03362973 | 1.299214783 | 0.520402  | NA | NA      | FZD10     |
| TIMP3     | -2.08494387 | 1.296640498 | 0.520402  | NA | NA      | TIMP3     |
| TFAM      | -2.21244877 | 1.295833643 | 0.520402  | NA | NA      | TFAM      |
| BOC       | -2.80684746 | 1.276563183 | 0         | NA | NA      | BOC       |
| CCDC28A   | -2.13096962 | 1.264175159 | 0.520402  | NA | NA      | CCDC28A   |
| MMP16     | -1.99497007 | 1.259489116 | 0.520402  | NA | NA      | MMP16     |
| CLCN3     | -2.07964964 | 1.255031196 | 0.520402  | NA | NA      | CLCN3     |
| PEX5L     | -2.16408121 | 1.245397069 | 0.520402  | NA | NA      | PEX5L     |
| TNIK      | -1.92592989 | 1.240527733 | 0.520402  | NA | TNIK    | TNIK      |
| ZNF326    | -2.32096285 | 1.239165076 | 0.1540868 | NA | NA      | ZNF326    |
| SS18      | -1.96813576 | 1.226954949 | 0.520402  | NA | NA      | SS18      |
| AKAP12    | -2.27860814 | 1.224420608 | 0.1540868 | NA | NA      | AKAP12    |
| SAMD9     | -1.96276899 | 1.223845755 | 0.520402  | NA | NA      | SAMD9     |
| SUMF1     | -2.10382774 | 1.219291023 | 0.520402  | NA | NA      | SUMF1     |
| MPPED1    | -2.01198389 | 1.217516571 | 0.520402  | NA | NA      | MPPED1    |
| SHFM1     | -2.02317348 | 1.217277413 | 0.520402  | NA | SHFM1   | SHFM1     |
| C3orf17   | -1.91280258 | 1.213563178 | 0.520402  | NA | NA      | C3orf17   |
| HIBADH    | -1.98143835 | 1.211610456 | 0.520402  | NA | HIBADH  | HIBADH    |
| MAML3     | -2.2695581  | 1.182789139 | 0.1540868 | NA | NA      | MAML3     |
| AHI1      | -1.9220662  | 1.182095369 | 0.520402  | NA | NA      | AHI1      |
| MCPH1     | -2.16212023 | 1.181917204 | 0.520402  | NA | MCPH1   | MCPH1     |
| RBMS3     | -2.53824342 | 1.174347585 | 0.1540868 | NA | RBMS3   | RBMS3     |
| TSPAN3    | -1.90848538 | 1.122098293 | 0.520402  | NA | NA      | TSPAN3    |
| SLC39A10  | 2.208794368 | 0.836722995 | 0.520402  | NA | NA      | SLC39A10  |
| PFKP      | 2.154326983 | 0.80612248  | 0.520402  | NA | PFKP    | PFKP      |
| CACNG2    | 2.453906731 | 0.790183967 | 0.520402  | NA | NA      | CACNG2    |

|          |             |             |           |    |          |          |
|----------|-------------|-------------|-----------|----|----------|----------|
| PITRM1   | 2.777443066 | 0.789302367 | 0.1540868 | NA | NA       | PITRM1   |
| CHEK2    | 2.114178998 | 0.785876281 | 0.520402  | NA | NA       | CHEK2    |
| CRB1     | 2.721836542 | 0.778340406 | 0.1540868 | NA | CRB1     | CRB1     |
| PON1     | 2.083377541 | 0.777106183 | 0.520402  | NA | NA       | PON1     |
| LMX1A    | 2.455077253 | 0.771723071 | 0.520402  | NA | NA       | LMX1A    |
| FLJ46321 | 2.449140041 | 0.767112038 | 0.520402  | NA | NA       | FLJ46321 |
| TFDP3    | 2.230751504 | 0.763275533 | 0.520402  | NA | NA       | TFDP3    |
| RGS22    | 2.172300014 | 0.760066715 | 0.520402  | NA | NA       | RGS22    |
| FAM19A2  | 3.079103642 | 0.755605038 | 0         | NA | FAM19A2  | FAM19A2  |
| FLJ32063 | 3.421259059 | 0.747785344 | 0         | NA | FLJ32063 | FLJ32063 |
| ATIC     | 2.099638565 | 0.745570268 | 0.520402  | NA | NA       | ATIC     |
| WIT1     | 2.083036558 | 0.740352502 | 0.520402  | NA | NA       | WIT1     |
| HSD11B2  | 2.292516661 | 0.72482175  | 0.520402  | NA | NA       | HSD11B2  |
| MAS1     | 2.096200531 | 0.723824276 | 0.520402  | NA | NA       | MAS1     |
| HDCC2    | 2.513864005 | 0.718404422 | 0.1540868 | NA | NA       | HDCC2    |
| DNAH7    | 2.419109983 | 0.707731731 | 0.520402  | NA | DNAH7    | DNAH7    |
| KCTD16   | 2.354394955 | 0.60252427  | 0.520402  | NA | NA       | KCTD16   |
| BMPR1B   | 2.606890498 | 0.576279577 | 0.1540868 | NA | NA       | BMPR1B   |
| TNNI3K   | 4.763428484 | 0.575831723 | 0         | NA | NA       | TNNI3K   |

### **maCNS only 17vs19 q<0.01**

| <b>SYMBOL</b> | <b>17vs19.d</b> | <b>17vs19.FC</b> | <b>17vs19.q</b> | <b>haCNS</b> | <b>caCNS</b> | <b>maCNS</b> |
|---------------|-----------------|------------------|-----------------|--------------|--------------|--------------|
| FZD3          | -4.97298279     | 2.702230523      | 0               | NA           | NA           | FZD3         |
| GRIN2B        | -2.78934944     | 1.864057191      | 0               | NA           | NA           | GRIN2B       |
| RSRC1         | -3.56506296     | 1.713336184      | 0               | NA           | NA           | RSRC1        |
| DKK1          | -3.65002751     | 1.683887969      | 0               | NA           | NA           | DKK1         |
| DOCK7         | -5.76606227     | 1.628981586      | 0               | NA           | NA           | DOCK7        |
| ZNF644        | -2.5407901      | 1.554425864      | 0.1540868       | NA           | NA           | ZNF644       |
| DKK2          | -2.79721009     | 1.543479741      | 0               | NA           | NA           | DKK2         |
| COL1A2        | -2.52470031     | 1.537572268      | 0.1540868       | NA           | NA           | COL1A2       |
| TBX15         | -3.22463323     | 1.533015644      | 0               | NA           | NA           | TBX15        |
| BBX           | -2.72541303     | 1.503352785      | 0               | NA           | NA           | BBX          |
| TOP1          | -2.58635713     | 1.421338755      | 0.1540868       | NA           | NA           | TOP1         |
| PEX7          | -2.83204478     | 1.415530499      | 0               | NA           | NA           | PEX7         |
| BCL11B        | -3.06436444     | 1.391389965      | 0               | NA           | NA           | BCL11B       |
| CBX5          | -2.34906748     | 1.389545675      | 0.1540868       | NA           | NA           | CBX5         |
| C20orf94      | -2.87595556     | 1.387615802      | 0               | NA           | NA           | C20orf94     |
| TWIST1        | -2.17847544     | 1.387156152      | 0.520402        | NA           | NA           | TWIST1       |
| C14orf101     | -3.32291015     | 1.386521163      | 0               | NA           | NA           | C14orf101    |
| SYT6          | -2.1545715      | 1.3776413        | 0.520402        | NA           | NA           | SYT6         |
| ZIC1          | -2.0479031      | 1.373878606      | 0.520402        | NA           | NA           | ZIC1         |
| ALDH1A2       | -2.91445951     | 1.370079363      | 0               | NA           | NA           | ALDH1A2      |
| GLCE          | -3.29791405     | 1.361077222      | 0               | NA           | NA           | GLCE         |
| ZNF673        | -2.82951419     | 1.350680326      | 0               | NA           | NA           | ZNF673       |
| FBN1          | -2.22232971     | 1.350007951      | 0.520402        | NA           | NA           | FBN1         |
| EIF2C3        | -2.04353922     | 1.342983542      | 0.520402        | NA           | NA           | EIF2C3       |
| C14orf118     | -2.35311208     | 1.330164075      | 0.1540868       | NA           | NA           | C14orf118    |
| ZNF281        | -3.44029224     | 1.328545073      | 0               | NA           | NA           | ZNF281       |
| ADAMTS5       | -2.55787551     | 1.321249272      | 0.1540868       | NA           | NA           | ADAMTS5      |
| KLF5          | -3.32459292     | 1.312042574      | 0               | NA           | NA           | KLF5         |
| FRMD6         | -2.21758141     | 1.302538678      | 0.520402        | NA           | NA           | FRMD6        |
| CASC3         | -2.66470508     | 1.300765107      | 0.1540868       | NA           | NA           | CASC3        |
| FZD10         | -2.03362973     | 1.299214783      | 0.520402        | NA           | NA           | FZD10        |

|          |             |             |           |    |    |          |
|----------|-------------|-------------|-----------|----|----|----------|
| TIMP3    | -2.08494387 | 1.296640498 | 0.520402  | NA | NA | TIMP3    |
| TFAM     | -2.21244877 | 1.295833643 | 0.520402  | NA | NA | TFAM     |
| BOC      | -2.80684746 | 1.276563183 | 0         | NA | NA | BOC      |
| CCDC28A  | -2.13096962 | 1.264175159 | 0.520402  | NA | NA | CCDC28A  |
| MMP16    | -1.99497007 | 1.259489116 | 0.520402  | NA | NA | MMP16    |
| CLCN3    | -2.07964964 | 1.255031196 | 0.520402  | NA | NA | CLCN3    |
| PEX5L    | -2.16408121 | 1.245397069 | 0.520402  | NA | NA | PEX5L    |
| ZNF326   | -2.32096285 | 1.239165076 | 0.1540868 | NA | NA | ZNF326   |
| SS18     | -1.96813576 | 1.226954949 | 0.520402  | NA | NA | SS18     |
| AKAP12   | -2.27860814 | 1.224420608 | 0.1540868 | NA | NA | AKAP12   |
| SAMD9    | -1.96276899 | 1.223845755 | 0.520402  | NA | NA | SAMD9    |
| SUMF1    | -2.10382774 | 1.219291023 | 0.520402  | NA | NA | SUMF1    |
| MPPED1   | -2.01198389 | 1.217516571 | 0.520402  | NA | NA | MPPED1   |
| C3orf17  | -1.91280258 | 1.213563178 | 0.520402  | NA | NA | C3orf17  |
| MAML3    | -2.2695581  | 1.182789139 | 0.1540868 | NA | NA | MAML3    |
| AHI1     | -1.9220662  | 1.182095369 | 0.520402  | NA | NA | AHI1     |
| TSPAN3   | -1.90848538 | 1.122098293 | 0.520402  | NA | NA | TSPAN3   |
| SLC39A10 | 2.208794368 | 0.836722995 | 0.520402  | NA | NA | SLC39A10 |
| CACNG2   | 2.453906731 | 0.790183967 | 0.520402  | NA | NA | CACNG2   |
| PITRM1   | 2.777443066 | 0.789302367 | 0.1540868 | NA | NA | PITRM1   |
| CHEK2    | 2.114178998 | 0.785876281 | 0.520402  | NA | NA | CHEK2    |
| PON1     | 2.083377541 | 0.777106183 | 0.520402  | NA | NA | PON1     |
| LMX1A    | 2.455077253 | 0.771723071 | 0.520402  | NA | NA | LMX1A    |
| FLJ46321 | 2.449140041 | 0.767112038 | 0.520402  | NA | NA | FLJ46321 |
| TFDP3    | 2.230751504 | 0.763275533 | 0.520402  | NA | NA | TFDP3    |
| RGS22    | 2.172300014 | 0.760066715 | 0.520402  | NA | NA | RGS22    |
| ATIC     | 2.099638565 | 0.745570268 | 0.520402  | NA | NA | ATIC     |
| WIT1     | 2.083036558 | 0.740352502 | 0.520402  | NA | NA | WIT1     |
| HSD11B2  | 2.292516661 | 0.72482175  | 0.520402  | NA | NA | HSD11B2  |
| MAS1     | 2.096200531 | 0.723824276 | 0.520402  | NA | NA | MAS1     |
| HDDC2    | 2.513864005 | 0.718404422 | 0.1540868 | NA | NA | HDDC2    |
| KCTD16   | 2.354394955 | 0.60252427  | 0.520402  | NA | NA | KCTD16   |
| BMPR1B   | 2.606890498 | 0.576279577 | 0.1540868 | NA | NA | BMPR1B   |
| TNNI3K   | 4.763428484 | 0.575831723 | 0         | NA | NA | TNNI3K   |

## Supplementary table 2

### HAR PFOvsPT q<0.01

| SYMBOL   | PFOvsPT.d  | PFOvsPT.FC | PFOvsPT.q | HAR      | CAR     | MAR      |
|----------|------------|------------|-----------|----------|---------|----------|
| ADRA2A   | -2.2026569 | 1.32088762 | 0         | ADRA2A   | ADRA2A  | ADRA2A   |
| AKT3     | 5.2245195  | 0.38230327 | 0         | AKT3     | AKT3    | AKT3     |
| ASTN2    | -3.537837  | 1.8451722  | 0         | ASTN2    | ASTN2   | ASTN2    |
| BCL11A   | 2.8875415  | 0.57742488 | 0         | BCL11A   | BCL11A  | BCL11A   |
| BCL3     | -2.7106502 | 2.07461849 | 0         | BCL3     | BCL3    | NA       |
| BMP2     | -4.2137159 | 2.61468581 | 0         | BMP2     | BMP2    | BMP2     |
| C4orf32  | 2.3831704  | 0.76084728 | 0         | C4orf32  | C4orf32 | C4orf32  |
| CA10     | -6.12      | 5.71221273 | 0         | CA10     | CA10    | CA10     |
| CDH8     | -6.0646864 | 4.185182   | 0         | CDH8     | CDH8    | CDH8     |
| CNTN4    | -4.2956365 | 2.05345693 | 0         | CNTN4    | CNTN4   | CNTN4    |
| CNTN6    | -2.8124791 | 1.62508137 | 0         | CNTN6    | CNTN6   | CNTN6    |
| CTNNA2   | 2.3498011  | 0.72677424 | 0         | CTNNA2   | CTNNA2  | CTNNA2   |
| DPP10    | 2.3546219  | 0.6215833  | 0         | DPP10    | DPP10   | DPP10    |
| EGLN3    | -2.9967726 | 1.72101012 | 0         | EGLN3    | EGLN3   | EGLN3    |
| FAM181B  | -2.4483969 | 1.44723701 | 0         | FAM181B  | FAM181B | FAM181B  |
| FAM5C    | -6.2733541 | 4.38293974 | 0         | FAM5C    | FAM5C   | FAM5C    |
| FST      | 2.4569874  | 0.57303    | 0         | FST      | FST     | FST      |
| GBE1     | -3.791506  | 1.82357854 | 0         | GBE1     | GBE1    | GBE1     |
| GFRA2    | -3.4819788 | 2.03486324 | 0         | GFRA2    | GFRA2   | GFRA2    |
| KCNV1    | -2.3638489 | 1.62181689 | 0         | KCNV1    | KCNV1   | KCNV1    |
| LHX2     | 5.766844   | 0.4639514  | 0         | LHX2     | LHX2    | LHX2     |
| LPHN2    | 4.2270257  | 0.47033437 | 0         | LPHN2    | LPHN2   | LPHN2    |
| LRRC8B   | -2.8892578 | 1.4786014  | 0         | LRRC8B   | LRRC8B  | LRRC8B   |
| MEIS2    | -8.0564215 | 3.20343535 | 0         | MEIS2    | MEIS2   | MEIS2    |
| MID1IP1  | -3.3184109 | 1.50260718 | 0         | MID1IP1  | MID1IP1 | MID1IP1  |
| ADCYAP1  | -3.0970772 | 1.61592882 | 0         | ADCYAP1  | NA      | ADCYAP1  |
| ADRB1    | 3.2483725  | 0.62843359 | 0         | ADRB1    | NA      | ADRB1    |
| CBLN4    | -2.6478539 | 1.61876179 | 0         | CBLN4    | NA      | CBLN4    |
| CYTIP    | 2.420378   | 0.61081395 | 0         | CYTIP    | NA      | CYTIP    |
| FAM19A1  | 4.3485528  | 0.48800542 | 0         | FAM19A1  | NA      | FAM19A1  |
| FLJ13197 | 3.651636   | 0.51804829 | 0         | FLJ13197 | NA      | FLJ13197 |
| GPR64    | 4.0661047  | 0.33444216 | 0         | GPR64    | NA      | GPR64    |
| GSTA4    | 3.1060179  | 0.61447252 | 0         | GSTA4    | NA      | GSTA4    |
| HS3ST5   | -2.6831055 | 1.77210432 | 0         | HS3ST5   | NA      | HS3ST5   |
| INHBA    | 3.8503447  | 0.53577238 | 0         | INHBA    | NA      | INHBA    |
| ITGBL1   | -2.8160076 | 1.50576473 | 0         | ITGBL1   | NA      | ITGBL1   |
| KCNQ5    | -3.4225801 | 1.81548163 | 0         | KCNQ5    | NA      | KCNQ5    |
| KIAA1797 | 2.2970172  | 0.70104402 | 0         | KIAA1797 | NA      | KIAA1797 |
| KLF9     | -2.1921795 | 1.29718322 | 0         | KLF9     | NA      | NA       |
| L3MBTL4  | -7.3135318 | 2.8540538  | 0         | L3MBTL4  | NA      | L3MBTL4  |
| LRRN3    | 3.7923133  | 0.62994277 | 0         | LRRN3    | NA      | LRRN3    |
| LYPD1    | -2.40434   | 1.63547339 | 0         | LYPD1    | NA      | LYPD1    |
| MN1      | -2.3740917 | 1.37684425 | 0         | MN1      | NA      | MN1      |
| NDST3    | -5.1022264 | 3.64574782 | 0         | NDST3    | NA      | NDST3    |
| NEUROG2  | -9.5369696 | 4.35523689 | 0         | NEUROG2  | NA      | NA       |
| PCDH10   | -5.8434513 | 2.90835591 | 0         | PCDH10   | NA      | PCDH10   |
| PLEKHH2  | 2.7074491  | 0.60084142 | 0         | PLEKHH2  | NA      | PLEKHH2  |

|            |            |            |            |            |            |            |
|------------|------------|------------|------------|------------|------------|------------|
| PLK2       | -4.1808613 | 1.84061633 | 0          | PLK2       | NA         | PLK2       |
| POU3F2     | -2.9474857 | 1.60823013 | 0          | POU3F2     | NA         | POU3F2     |
| PROKR2     | 6.4919927  | 0.36565726 | 0          | PROKR2     | NA         | NA         |
| RAB23      | 2.6716488  | 0.69797553 | 0          | RAB23      | NA         | RAB23      |
| RSPO2      | 4.4727342  | 0.45629497 | 0          | RSPO2      | NA         | RSPO2      |
| SDK1       | -8.517135  | 2.97888689 | 0          | SDK1       | NA         | SDK1       |
| SLC17A6    | 6.1620466  | 0.33699863 | 0          | SLC17A6    | NA         | NA         |
| SLITRK1    | -2.3569568 | 1.36395396 | 0          | SLITRK1    | NA         | SLITRK1    |
| SNAP25     | -3.1847382 | 1.56861137 | 0          | SNAP25     | NA         | NA         |
| SPATA18    | -2.9348408 | 1.57045958 | 0          | SPATA18    | NA         | SPATA18    |
| TCERG1L    | -4.262795  | 2.66773624 | 0          | TCERG1L    | NA         | TCERG1L    |
| THBS1      | 5.2207093  | 0.27836758 | 0          | THBS1      | NA         | THBS1      |
| TIAM1      | 2.5587991  | 0.72165618 | 0          | TIAM1      | NA         | NA         |
| TMCC3      | 2.9003394  | 0.62058748 | 0          | TMCC3      | NA         | TMCC3      |
| VLDLR      | -2.9318408 | 1.37952353 | 0          | VLDLR      | NA         | NA         |
| VSTM2L     | -7.6922484 | 5.1814054  | 0          | VSTM2L     | NA         | VSTM2L     |
| NCAM2      | 3.8690279  | 0.48696699 | 0          | NCAM2      | NCAM2      | NCAM2      |
| OPCML      | 3.7307845  | 0.52898093 | 0          | OPCML      | OPCML      | OPCML      |
| PART1      | -4.6456628 | 2.46597251 | 0          | PART1      | PART1      | PART1      |
| PCDH7      | 4.9943541  | 0.52826125 | 0          | PCDH7      | PCDH7      | PCDH7      |
| PCDH9      | 5.6119571  | 0.38338733 | 0          | PCDH9      | PCDH9      | PCDH9      |
| POU3F3     | -2.3728614 | 1.478081   | 0          | POU3F3     | POU3F3     | POU3F3     |
| PRAGMIN    | -5.4987885 | 2.1050636  | 0          | PRAGMIN    | PRAGMIN    | PRAGMIN    |
| PRR16      | 7.3717628  | 0.20836697 | 0          | PRR16      | PRR16      | PRR16      |
| ROBO1      | -2.1733223 | 1.36044369 | 0          | ROBO1      | ROBO1      | ROBO1      |
| SORCS3     | 3.7751832  | 0.46911502 | 0          | SORCS3     | SORCS3     | SORCS3     |
| SOX8       | 2.2105106  | 0.62278216 | 0          | SOX8       | SOX8       | NA         |
| ST6GALNAC5 | -6.0992162 | 2.36657776 | 0          | ST6GALNAC5 | ST6GALNAC5 | ST6GALNAC5 |
| TFAP2D     | -3.5078229 | 3.65801776 | 0          | TFAP2D     | TFAP2D     | TFAP2D     |
| TRHDE      | 7.4632306  | 0.22727706 | 0          | TRHDE      | TRHDE      | TRHDE      |
| YES1       | -3.7572556 | 1.84409437 | 0          | YES1       | YES1       | YES1       |
| ZBTB20     | -2.2143973 | 1.32042789 | 0          | ZBTB20     | ZBTB20     | ZBTB20     |
| ARAP2      | 2.1194073  | 0.7517203  | 0.11329523 | ARAP2      | ARAP2      | ARAP2      |
| ARHGAP15   | 2.0953211  | 0.73642574 | 0.11329523 | ARHGAP15   | ARHGAP15   | ARHGAP15   |
| EFNB2      | 2.0686762  | 0.67820706 | 0.11329523 | EFNB2      | EFNB2      | EFNB2      |
| ELAVL2     | -2.000231  | 1.49945115 | 0.11329523 | ELAVL2     | ELAVL2     | ELAVL2     |
| FLJ42709   | 2.0428552  | 0.71173922 | 0.11329523 | FLJ42709   | FLJ42709   | FLJ42709   |
| GLIS3      | -2.1030173 | 1.66495303 | 0.11329523 | GLIS3      | GLIS3      | GLIS3      |
| ETV5       | 2.0643668  | 0.73596483 | 0.11329523 | ETV5       | NA         | ETV5       |
| FAM86B1    | -2.0214709 | 1.32618968 | 0.11329523 | FAM86B1    | NA         | NA         |
| NFIA       | -2.0249092 | 1.54756066 | 0.11329523 | NFIA       | NA         | NFIA       |
| NR4A3      | 2.0575626  | 0.77554613 | 0.11329523 | NR4A3      | NA         | NR4A3      |
| PMP22      | -2.1046144 | 1.88169418 | 0.11329523 | PMP22      | NA         | PMP22      |
| SNX16      | 2.0222737  | 0.73542514 | 0.11329523 | SNX16      | NA         | SNX16      |
| THRB       | -2.1344228 | 1.6017252  | 0.11329523 | THRB       | NA         | THRB       |
| RPS6KA3    | 2.0394529  | 0.74879937 | 0.11329523 | RPS6KA3    | RPS6KA3    | RPS6KA3    |
| C8orf83    | 1.9837388  | 0.75462987 | 0.19206239 | C8orf83    | C8orf83    | C8orf83    |
| CNTNAP5    | 1.8672665  | 0.7789539  | 0.19206239 | CNTNAP5    | CNTNAP5    | CNTNAP5    |
| ETV1       | 1.8694001  | 0.72920593 | 0.19206239 | ETV1       | ETV1       | ETV1       |
| FAM84A     | 1.882711   | 0.74357273 | 0.19206239 | FAM84A     | FAM84A     | FAM84A     |
| FANCL      | 1.9582831  | 0.77641708 | 0.19206239 | FANCL      | FANCL      | FANCL      |
| FBXL17     | 1.8906911  | 0.71481587 | 0.19206239 | FBXL17     | FBXL17     | FBXL17     |
| GRIA3      | 1.848451   | 0.74980662 | 0.19206239 | GRIA3      | GRIA3      | GRIA3      |
| MGST1      | 1.8604752  | 0.70169159 | 0.19206239 | MGST1      | MGST1      | MGST1      |
| C3orf58    | 1.9392572  | 0.78454523 | 0.19206239 | C3orf58    | NA         | C3orf58    |
| DNAJC1     | 1.8836523  | 0.7871951  | 0.19206239 | DNAJC1     | NA         | DNAJC1     |
| DOK6       | 1.968978   | 0.74194772 | 0.19206239 | DOK6       | NA         | DOK6       |
| KCNJ2      | 1.8946814  | 0.65167684 | 0.19206239 | KCNJ2      | NA         | KCNJ2      |

|           |            |            |            |           |           |           |
|-----------|------------|------------|------------|-----------|-----------|-----------|
| KIAA0114  | 1.8648166  | 0.75999109 | 0.19206239 | KIAA0114  | NA        | KIAA0114  |
| LPHN3     | -1.935682  | 1.28725915 | 0.19206239 | LPHN3     | NA        | LPHN3     |
| PLCB4     | -1.9883246 | 1.38632628 | 0.19206239 | PLCB4     | NA        | PLCB4     |
| NLGN1     | 1.9729994  | 0.70393173 | 0.19206239 | NLGN1     | NLGN1     | NLGN1     |
| PARP8     | -1.8990028 | 1.45305744 | 0.19206239 | PARP8     | PARP8     | PARP8     |
| POU3F1    | -1.895519  | 1.42385159 | 0.19206239 | POU3F1    | POU3F1    | POU3F1    |
| PRKD1     | -1.9272667 | 1.32258417 | 0.19206239 | PRKD1     | PRKD1     | PRKD1     |
| SATB1     | 1.8658506  | 0.79817306 | 0.19206239 | SATB1     | SATB1     | SATB1     |
| XYLT1     | 1.9222051  | 0.80021924 | 0.19206239 | XYLT1     | XYLT1     | XYLT1     |
| CA8       | -1.7263499 | 1.23979534 | 0.56921718 | CA8       | CA8       | CA8       |
| CDH11     | -1.6807595 | 1.26770628 | 0.56921718 | CDH11     | CDH11     | CDH11     |
| DCTD      | -1.7916642 | 1.25421313 | 0.56921718 | DCTD      | DCTD      | DCTD      |
| DIO2      | -1.6845813 | 1.34564495 | 0.56921718 | DIO2      | DIO2      | DIO2      |
| LRRTM1    | -1.7425734 | 1.47680773 | 0.56921718 | LRRTM1    | LRRTM1    | LRRTM1    |
| BIN1      | -1.7670401 | 1.42300715 | 0.56921718 | BIN1      | NA        | BIN1      |
| NMNAT3    | -1.7568169 | 1.32096251 | 0.56921718 | NMNAT3    | NA        | NMNAT3    |
| NTN1      | -1.7302086 | 1.30085813 | 0.56921718 | NTN1      | NA        | NTN1      |
| PBX1      | -1.7364712 | 1.3212575  | 0.56921718 | PBX1      | NA        | PBX1      |
| TCF4      | 1.7294234  | 0.77062722 | 0.56921718 | TCF4      | NA        | TCF4      |
| PTPRG     | 1.7029704  | 0.73794978 | 0.56921718 | PTPRG     | PTPRG     | PTPRG     |
| RAP1GAP   | 1.7936958  | 0.72250668 | 0.56921718 | RAP1GAP   | RAP1GAP   | RAP1GAP   |
| SLC35F4   | -1.7080815 | 1.50640057 | 0.56921718 | SLC35F4   | SLC35F4   | SLC35F4   |
| VRK2      | 1.6716374  | 0.6899739  | 0.56921718 | VRK2      | VRK2      | VRK2      |
| ZNF703    | -1.7219587 | 1.2649145  | 0.56921718 | ZNF703    | ZNF703    | ZNF703    |
| CADM1     | 1.5423172  | 0.78415892 | 0.88419955 | CADM1     | CADM1     | CADM1     |
| CADM2     | 1.6480507  | 0.78473465 | 0.88419955 | CADM2     | CADM2     | CADM2     |
| CDC73     | 1.5686281  | 0.79791535 | 0.88419955 | CDC73     | CDC73     | CDC73     |
| CSMD1     | -1.6330538 | 1.2029593  | 0.88419955 | CSMD1     | CSMD1     | NA        |
| EFNA5     | 1.6238383  | 0.80556294 | 0.88419955 | EFNA5     | EFNA5     | EFNA5     |
| HNMT      | 1.6412867  | 0.77996165 | 0.88419955 | HNMT      | HNMT      | HNMT      |
| KIF16B    | 1.6187313  | 0.77976982 | 0.88419955 | KIF16B    | KIF16B    | KIF16B    |
| LMO1      | 1.5536779  | 0.74571502 | 0.88419955 | LMO1      | LMO1      | LMO1      |
| LOC220930 | 1.5258504  | 0.73363307 | 0.88419955 | LOC220930 | LOC220930 | LOC220930 |
| LRRC37A   | 1.5081892  | 0.70175357 | 0.88419955 | LRRC37A   | LRRC37A   | NA        |
| CSMD3     | -1.5303673 | 1.2347212  | 0.88419955 | CSMD3     | NA        | CSMD3     |
| ETV6      | -1.5174112 | 1.34083786 | 0.88419955 | ETV6      | NA        | ETV6      |
| FTSJD1    | 1.615738   | 0.73069219 | 0.88419955 | FTSJD1    | NA        | FTSJD1    |
| ITGA4     | 1.5542557  | 0.80397129 | 0.88419955 | ITGA4     | NA        | ITGA4     |
| NRCAM     | -1.5882778 | 1.23232595 | 0.88419955 | NRCAM     | NA        | NRCAM     |
| SLC7A11   | -1.5125867 | 1.3357056  | 0.88419955 | SLC7A11   | NA        | SLC7A11   |
| STIM2     | 1.6017321  | 0.73637926 | 0.88419955 | STIM2     | NA        | STIM2     |
| PTPRD     | 1.601349   | 0.82378207 | 0.88419955 | PTPRD     | PTPRD     | PTPRD     |
| UNC5C     | 1.5826048  | 0.82539105 | 0.88419955 | UNC5C     | UNC5C     | UNC5C     |

## **HAR-CAR PFOvsPT q<0.01**

| <b>SYMBOL</b> | <b>PFOvsPT.d</b> | <b>PFOvsPT.FC</b> | <b>PFOvsPT.q</b> | <b>HAR</b> | <b>CAR</b> | <b>MAR</b> |
|---------------|------------------|-------------------|------------------|------------|------------|------------|
| ADCYAP1       | -3.0970772       | 1.61592882        | 0                | ADCYAP1    | NA         | ADCYAP1    |
| ADRB1         | 3.2483725        | 0.62843359        | 0                | ADRB1      | NA         | ADRB1      |
| CBLN4         | -2.6478539       | 1.61876179        | 0                | CBLN4      | NA         | CBLN4      |
| CYTIP         | 2.420378         | 0.61081395        | 0                | CYTIP      | NA         | CYTIP      |
| FAM19A1       | 4.3485528        | 0.48800542        | 0                | FAM19A1    | NA         | FAM19A1    |
| FLJ13197      | 3.651636         | 0.51804829        | 0                | FLJ13197   | NA         | FLJ13197   |
| GPR64         | 4.0661047        | 0.33444216        | 0                | GPR64      | NA         | GPR64      |



|          |            |            |            |          |    |          |
|----------|------------|------------|------------|----------|----|----------|
| GSTA4    | 3.1060179  | 0.61447252 | 0          | GSTA4    | NA | GSTA4    |
| HS3ST5   | -2.6831055 | 1.77210432 | 0          | HS3ST5   | NA | HS3ST5   |
| INHBA    | 3.8503447  | 0.53577238 | 0          | INHBA    | NA | INHBA    |
| ITGBL1   | -2.8160076 | 1.50576473 | 0          | ITGBL1   | NA | ITGBL1   |
| KCNQ5    | -3.4225801 | 1.81548163 | 0          | KCNQ5    | NA | KCNQ5    |
| KIAA1797 | 2.2970172  | 0.70104402 | 0          | KIAA1797 | NA | KIAA1797 |
| L3MBTL4  | -7.3135318 | 2.8540538  | 0          | L3MBTL4  | NA | L3MBTL4  |
| LRRN3    | 3.7923133  | 0.62994277 | 0          | LRRN3    | NA | LRRN3    |
| LYPD1    | -2.40434   | 1.63547339 | 0          | LYPD1    | NA | LYPD1    |
| MN1      | -2.3740917 | 1.37684425 | 0          | MN1      | NA | MN1      |
| KLF9     | -2.1921795 | 1.29718322 | 0          | KLF9     | NA | NA       |
| NEUROG2  | -9.5369696 | 4.35523689 | 0          | NEUROG2  | NA | NA       |
| PROKR2   | 6.4919927  | 0.36565726 | 0          | PROKR2   | NA | NA       |
| SLC17A6  | 6.1620466  | 0.33699863 | 0          | SLC17A6  | NA | NA       |
| SNAP25   | -3.1847382 | 1.56861137 | 0          | SNAP25   | NA | NA       |
| TIAM1    | 2.5587991  | 0.72165618 | 0          | TIAM1    | NA | NA       |
| VLDLR    | -2.9318408 | 1.37952353 | 0          | VLDLR    | NA | NA       |
| NDST3    | -5.1022264 | 3.64574782 | 0          | NDST3    | NA | NDST3    |
| PCDH10   | -5.8434513 | 2.90835591 | 0          | PCDH10   | NA | PCDH10   |
| PLEKHH2  | 2.7074491  | 0.60084142 | 0          | PLEKHH2  | NA | PLEKHH2  |
| PLK2     | -4.1808613 | 1.84061633 | 0          | PLK2     | NA | PLK2     |
| POU3F2   | -2.9474857 | 1.60823013 | 0          | POU3F2   | NA | POU3F2   |
| RAB23    | 2.6716488  | 0.69797553 | 0          | RAB23    | NA | RAB23    |
| RSPO2    | 4.4727342  | 0.45629497 | 0          | RSPO2    | NA | RSPO2    |
| SDK1     | -8.517135  | 2.97888689 | 0          | SDK1     | NA | SDK1     |
| SLITRK1  | -2.3569568 | 1.36395396 | 0          | SLITRK1  | NA | SLITRK1  |
| SPATA18  | -2.9348408 | 1.57045958 | 0          | SPATA18  | NA | SPATA18  |
| TCERG1L  | -4.262795  | 2.66773624 | 0          | TCERG1L  | NA | TCERG1L  |
| THBS1    | 5.2207093  | 0.27836758 | 0          | THBS1    | NA | THBS1    |
| TMCC3    | 2.9003394  | 0.62058748 | 0          | TMCC3    | NA | TMCC3    |
| VSTM2L   | -7.6922484 | 5.1814054  | 0          | VSTM2L   | NA | VSTM2L   |
| ETV5     | 2.0643668  | 0.73596483 | 0.11329523 | ETV5     | NA | ETV5     |
| FAM86B1  | -2.0214709 | 1.32618968 | 0.11329523 | FAM86B1  | NA | NA       |
| NFIA     | -2.0249092 | 1.54756066 | 0.11329523 | NFIA     | NA | NFIA     |
| NR4A3    | 2.0575626  | 0.77554613 | 0.11329523 | NR4A3    | NA | NR4A3    |
| PMP22    | -2.1046144 | 1.88169418 | 0.11329523 | PMP22    | NA | PMP22    |
| SNX16    | 2.0222737  | 0.73542514 | 0.11329523 | SNX16    | NA | SNX16    |
| THRB     | -2.1344228 | 1.6017252  | 0.11329523 | THRB     | NA | THRB     |
| C3orf58  | 1.9392572  | 0.78454523 | 0.19206239 | C3orf58  | NA | C3orf58  |
| DNAJC1   | 1.8836523  | 0.7871951  | 0.19206239 | DNAJC1   | NA | DNAJC1   |
| DOK6     | 1.968978   | 0.74194772 | 0.19206239 | DOK6     | NA | DOK6     |
| KCNJ2    | 1.8946814  | 0.65167684 | 0.19206239 | KCNJ2    | NA | KCNJ2    |
| KIAA0114 | 1.8648166  | 0.75999109 | 0.19206239 | KIAA0114 | NA | KIAA0114 |
| LPHN3    | -1.935682  | 1.28725915 | 0.19206239 | LPHN3    | NA | LPHN3    |
| PLCB4    | -1.9883246 | 1.38632628 | 0.19206239 | PLCB4    | NA | PLCB4    |
| BIN1     | -1.7670401 | 1.42300715 | 0.56921718 | BIN1     | NA | BIN1     |
| NMNAT3   | -1.7568169 | 1.32096251 | 0.56921718 | NMNAT3   | NA | NMNAT3   |
| NTN1     | -1.7302086 | 1.30085813 | 0.56921718 | NTN1     | NA | NTN1     |
| PBX1     | -1.7364712 | 1.3212575  | 0.56921718 | PBX1     | NA | PBX1     |
| TCF4     | 1.7294234  | 0.77062722 | 0.56921718 | TCF4     | NA | TCF4     |
| CSMD3    | -1.5303673 | 1.2347212  | 0.88419955 | CSMD3    | NA | CSMD3    |
| ETV6     | -1.5174112 | 1.34083786 | 0.88419955 | ETV6     | NA | ETV6     |
| FTSJD1   | 1.615738   | 0.73069219 | 0.88419955 | FTSJD1   | NA | FTSJD1   |
| ITGA4    | 1.5542557  | 0.80397129 | 0.88419955 | ITGA4    | NA | ITGA4    |
| NRCAM    | -1.5882778 | 1.23232595 | 0.88419955 | NRCAM    | NA | NRCAM    |
| SLC7A11  | -1.5125867 | 1.3357056  | 0.88419955 | SLC7A11  | NA | SLC7A11  |
| STIM2    | 1.6017321  | 0.73637926 | 0.88419955 | STIM2    | NA | STIM2    |

## **HAR only PFOvsPT q<0.01**

| <b>SYMBOL</b> | <b>PFOvsPT.d</b> | <b>PFOvsPT.FC</b> | <b>PFOvsPT.q</b> | <b>HAR</b> | <b>CAR</b> | <b>MAR</b> |
|---------------|------------------|-------------------|------------------|------------|------------|------------|
| KLF9          | -2.1921795       | 1.29718322        | 0                | KLF9       | NA         | NA         |
| NEUROG2       | -9.5369696       | 4.35523689        | 0                | NEUROG2    | NA         | NA         |
| PROKR2        | 6.4919927        | 0.36565726        | 0                | PROKR2     | NA         | NA         |
| SLC17A6       | 6.1620466        | 0.33699863        | 0                | SLC17A6    | NA         | NA         |
| SNAP25        | -3.1847382       | 1.56861137        | 0                | SNAP25     | NA         | NA         |
| TIAM1         | 2.5587991        | 0.72165618        | 0                | TIAM1      | NA         | NA         |
| VLDLR         | -2.9318408       | 1.37952353        | 0                | VLDLR      | NA         | NA         |
| FAM86B1       | -2.0214709       | 1.32618968        | 0.11329523       | FAM86B1    | NA         | NA         |

## **CAR PFOvsPT q<0.01**

| <b>SYMBOL</b> | <b>PFOvsPT.d</b> | <b>PFOvsPT.FC</b> | <b>PFOvsPT.q</b> | <b>HAR</b> | <b>CAR</b> | <b>MAR</b> |
|---------------|------------------|-------------------|------------------|------------|------------|------------|
| ADRA2A        | -2.2026569       | 1.32088762        | 0                | ADRA2A     | ADRA2A     | ADRA2A     |
| AKT3          | 5.2245195        | 0.38230327        | 0                | AKT3       | AKT3       | AKT3       |
| ASTN2         | -3.537837        | 1.8451722         | 0                | ASTN2      | ASTN2      | ASTN2      |
| BCL11A        | 2.8875415        | 0.57742488        | 0                | BCL11A     | BCL11A     | BCL11A     |
| BCL3          | -2.7106502       | 2.07461849        | 0                | BCL3       | BCL3       | NA         |
| BMP2          | -4.2137159       | 2.61468581        | 0                | BMP2       | BMP2       | BMP2       |
| C4orf32       | 2.3831704        | 0.76084728        | 0                | C4orf32    | C4orf32    | C4orf32    |
| CA10          | -6.12            | 5.71221273        | 0                | CA10       | CA10       | CA10       |
| CDH8          | -6.0646864       | 4.185182          | 0                | CDH8       | CDH8       | CDH8       |
| CNTN4         | -4.2956365       | 2.05345693        | 0                | CNTN4      | CNTN4      | CNTN4      |
| CNTN6         | -2.8124791       | 1.62508137        | 0                | CNTN6      | CNTN6      | CNTN6      |
| CTNNA2        | 2.3498011        | 0.72677424        | 0                | CTNNA2     | CTNNA2     | CTNNA2     |
| DPP10         | 2.3546219        | 0.6215833         | 0                | DPP10      | DPP10      | DPP10      |
| EGLN3         | -2.9967726       | 1.72101012        | 0                | EGLN3      | EGLN3      | EGLN3      |
| FAM181B       | -2.4483969       | 1.44723701        | 0                | FAM181B    | FAM181B    | FAM181B    |
| FAM5C         | -6.2733541       | 4.38293974        | 0                | FAM5C      | FAM5C      | FAM5C      |
| FST           | 2.4569874        | 0.57303           | 0                | FST        | FST        | FST        |
| GBE1          | -3.791506        | 1.82357854        | 0                | GBE1       | GBE1       | GBE1       |
| GFRA2         | -3.4819788       | 2.03486324        | 0                | GFRA2      | GFRA2      | GFRA2      |
| KCNV1         | -2.3638489       | 1.62181689        | 0                | KCNV1      | KCNV1      | KCNV1      |
| LHX2          | 5.766844         | 0.4639514         | 0                | LHX2       | LHX2       | LHX2       |
| LPHN2         | 4.2270257        | 0.47033437        | 0                | LPHN2      | LPHN2      | LPHN2      |
| LRRC8B        | -2.8892578       | 1.4786014         | 0                | LRRC8B     | LRRC8B     | LRRC8B     |
| MEIS2         | -8.0564215       | 3.20343535        | 0                | MEIS2      | MEIS2      | MEIS2      |
| MID1IP1       | -3.3184109       | 1.50260718        | 0                | MID1IP1    | MID1IP1    | MID1IP1    |
| ACCN1         | -2.6307648       | 1.67979598        | 0                | NA         | ACCN1      | ACCN1      |
| ADAMTS16      | -2.3622011       | 1.76005451        | 0                | NA         | ADAMTS16   | ADAMTS16   |
| AK5           | 2.4672315        | 0.67898931        | 0                | NA         | AK5        | AK5        |
| ANKRD32       | -5.2441495       | 2.29550366        | 0                | NA         | ANKRD32    | ANKRD32    |
| APOO          | -2.2526913       | 1.32642345        | 0                | NA         | APOO       | APOO       |
| ARHGDIB       | -2.6187164       | 1.37947451        | 0                | NA         | ARHGDIB    | NA         |
| ARNTL         | 2.5357596        | 0.65285149        | 0                | NA         | ARNTL      | ARNTL      |
| CACNA1A       | -5.7244908       | 2.02037437        | 0                | NA         | CACNA1A    | NA         |
| CACNA2D3      | -5.0183639       | 2.37311616        | 0                | NA         | CACNA2D3   | CACNA2D3   |
| CBLN1         | -7.7041147       | 4.80719481        | 0                | NA         | CBLN1      | CBLN1      |

|           |            |            |   |    |           |           |
|-----------|------------|------------|---|----|-----------|-----------|
| CCDC109A  | -2.989666  | 1.63539425 | 0 | NA | CCDC109A  | CCDC109A  |
| CDH12     | -3.0931634 | 1.70193601 | 0 | NA | CDH12     | CDH12     |
| CDH9      | 3.3472538  | 0.50238639 | 0 | NA | CDH9      | CDH9      |
| CEP120    | -2.8706623 | 1.55083986 | 0 | NA | CEP120    | CEP120    |
| CGRRF1    | -4.1255188 | 2.23860247 | 0 | NA | CGRRF1    | CGRRF1    |
| CNKSR3    | -5.9495054 | 2.9706848  | 0 | NA | CNKSR3    | NA        |
| CNTN3     | -5.1226552 | 2.1416389  | 0 | NA | CNTN3     | CNTN3     |
| COX7A1    | 3.6220653  | 0.49840726 | 0 | NA | COX7A1    | COX7A1    |
| CPNE8     | -7.9019211 | 5.45090012 | 0 | NA | CPNE8     | CPNE8     |
| CTNNBL1   | -5.1701204 | 2.60508807 | 0 | NA | CTNNBL1   | CTNNBL1   |
| CTXN3     | -3.1547723 | 2.02249669 | 0 | NA | CTXN3     | CTXN3     |
| CXorf1    | 3.5295083  | 0.5214482  | 0 | NA | CXorf1    | CXorf1    |
| CYP27C1   | -4.0171215 | 2.88173718 | 0 | NA | CYP27C1   | NA        |
| DACH2     | 5.3983733  | 0.39389626 | 0 | NA | DACH2     | DACH2     |
| DACT1     | 3.7612088  | 0.6514341  | 0 | NA | DACT1     | DACT1     |
| DCBLD1    | 2.2063284  | 0.71430327 | 0 | NA | DCBLD1    | NA        |
| DGKI      | 2.8821568  | 0.44509385 | 0 | NA | DGKI      | DGKI      |
| DLG1      | 3.1684757  | 0.60089689 | 0 | NA | DLG1      | DLG1      |
| DNAH10    | -2.8406866 | 1.5059201  | 0 | NA | DNAH10    | NA        |
| DOK5      | 3.4689382  | 0.68277451 | 0 | NA | DOK5      | DOK5      |
| DYRK2     | 2.3302515  | 0.68671835 | 0 | NA | DYRK2     | DYRK2     |
| EPHA4     | -2.3288721 | 1.52144273 | 0 | NA | EPHA4     | EPHA4     |
| FAM19A5   | -2.2537914 | 1.36434919 | 0 | NA | FAM19A5   | FAM19A5   |
| FAM5B     | -2.7524322 | 1.60087371 | 0 | NA | FAM5B     | FAM5B     |
| FGF12     | -3.1985688 | 1.60028385 | 0 | NA | FGF12     | FGF12     |
| FGF14     | -4.161336  | 1.89013512 | 0 | NA | FGF14     | FGF14     |
| FLJ43390  | -9.7499031 | 5.56194442 | 0 | NA | FLJ43390  | FLJ43390  |
| FLRT3     | -6.0329061 | 2.31581298 | 0 | NA | FLRT3     | FLRT3     |
| FRMPD4    | 2.6700364  | 0.72369361 | 0 | NA | FRMPD4    | FRMPD4    |
| FSIP1     | 3.2066337  | 0.54366788 | 0 | NA | FSIP1     | NA        |
| GABRA1    | -2.4861275 | 1.5458172  | 0 | NA | GABRA1    | GABRA1    |
| GABRA5    | 4.1635031  | 0.57212962 | 0 | NA | GABRA5    | GABRA5    |
| GABRG2    | -2.500529  | 1.35616898 | 0 | NA | GABRG2    | GABRG2    |
| GAS1      | -2.8207017 | 1.43925682 | 0 | NA | GAS1      | GAS1      |
| GOLSYN    | 3.3184939  | 0.65282491 | 0 | NA | GOLSYN    | GOLSYN    |
| GRB14     | 2.5728727  | 0.49303609 | 0 | NA | GRB14     | GRB14     |
| H2AFY2    | -2.909317  | 1.40106706 | 0 | NA | H2AFY2    | H2AFY2    |
| HLF       | 4.0234794  | 0.4754812  | 0 | NA | HLF       | HLF       |
| ID2       | 3.8786506  | 0.44944894 | 0 | NA | ID2       | ID2       |
| IGFBP4    | 2.3828134  | 0.68418134 | 0 | NA | IGFBP4    | IGFBP4    |
| IGFBP5    | -2.834741  | 1.61843461 | 0 | NA | IGFBP5    | IGFBP5    |
| IGSF11    | -7.5561874 | 3.09731621 | 0 | NA | IGSF11    | IGSF11    |
| KIAA0182  | 2.8095351  | 0.6575132  | 0 | NA | KIAA0182  | KIAA0182  |
| KLF6      | -2.7404503 | 1.42932138 | 0 | NA | KLF6      | KLF6      |
| LGALS8    | 2.2259948  | 0.72480252 | 0 | NA | LGALS8    | LGALS8    |
| LHFP      | 3.3336246  | 0.60532507 | 0 | NA | LHFP      | LHFP      |
| LMO3      | -2.4423344 | 1.621965   | 0 | NA | LMO3      | LMO3      |
| LMO4      | -5.4333042 | 2.09762329 | 0 | NA | LMO4      | LMO4      |
| LOC150568 | -4.5808282 | 2.16132196 | 0 | NA | LOC150568 | LOC150568 |
| LOC283392 | 3.2109194  | 0.58737246 | 0 | NA | LOC283392 | LOC283392 |
| LOC645323 | 2.2641538  | 0.74917028 | 0 | NA | LOC645323 | LOC645323 |
| LOC653786 | 2.4826133  | 0.66960833 | 0 | NA | LOC653786 | LOC653786 |
| LRRTM4    | 5.9239675  | 0.23561301 | 0 | NA | LRRTM4    | LRRTM4    |
| MAMLD1    | -2.732106  | 1.53315954 | 0 | NA | MAMLD1    | MAMLD1    |
| MARCH3    | -5.561013  | 1.98423491 | 0 | NA | MARCH3    | MARCH3    |
| MAST4     | -4.5965819 | 1.89897414 | 0 | NA | MAST4     | MAST4     |
| MC4R      | -2.7448307 | 2.07739068 | 0 | NA | MC4R      | MC4R      |
| MDGA1     | -2.3368477 | 1.47049165 | 0 | NA | MDGA1     | MDGA1     |

|          |            |            |   |       |          |          |
|----------|------------|------------|---|-------|----------|----------|
| MEIS3P1  | -4.0994783 | 3.16136077 | 0 | NA    | MEIS3P1  | NA       |
| MID1     | 3.3365625  | 0.56004233 | 0 | NA    | MID1     | MID1     |
| MOSC1    | -2.4501897 | 1.4052336  | 0 | NA    | MOSC1    | MOSC1    |
| NDP      | -4.9907327 | 3.07052035 | 0 | NA    | NDP      | NDP      |
| NOG      | -3.1842631 | 2.05302024 | 0 | NA    | NOG      | NOG      |
| NR3C1    | 3.9886444  | 0.55590161 | 0 | NA    | NR3C1    | NR3C1    |
| NR3C2    | 6.2948111  | 0.35436521 | 0 | NA    | NR3C2    | NR3C2    |
| NR4A2    | 5.3728796  | 0.31034033 | 0 | NA    | NR4A2    | NR4A2    |
| NTNG2    | 5.0387291  | 0.27228346 | 0 | NA    | NTNG2    | NTNG2    |
| NXPH3    | 3.2378358  | 0.63766383 | 0 | NA    | NXPH3    | NXPH3    |
| ODZ4     | 2.4831271  | 0.71491135 | 0 | NA    | ODZ4     | ODZ4     |
| OLFM3    | -2.3427178 | 1.60992788 | 0 | NA    | OLFM3    | OLFM3    |
| PBX3     | 2.6304097  | 0.71030199 | 0 | NA    | PBX3     | PBX3     |
| PCDH17   | -5.0671224 | 2.34152922 | 0 | NA    | PCDH17   | PCDH17   |
| PCDH18   | -2.4106968 | 1.50798322 | 0 | NA    | PCDH18   | PCDH18   |
| PCSK9    | 2.8585448  | 0.66795293 | 0 | NA    | PCSK9    | PCSK9    |
| PDE4DIP  | 2.650362   | 0.69291976 | 0 | NA    | PDE4DIP  | PDE4DIP  |
| PDZRN4   | -5.4476486 | 2.63707924 | 0 | NA    | PDZRN4   | PDZRN4   |
| PHLDA1   | -4.0501691 | 1.65922624 | 0 | NA    | PHLDA1   | PHLDA1   |
| PIK3AP1  | 2.7624911  | 0.64434479 | 0 | NA    | PIK3AP1  | PIK3AP1  |
| PKIG     | -2.4710853 | 1.51923202 | 0 | NA    | PKIG     | NA       |
| PLAGL1   | 2.7294518  | 0.62240269 | 0 | NA    | PLAGL1   | NA       |
| PPARGC1A | 2.5259817  | 0.69605157 | 0 | NA    | PPARGC1A | PPARGC1A |
| PSD2     | -2.1802477 | 1.30380301 | 0 | NA    | PSD2     | PSD2     |
| PTER     | -3.937988  | 2.21395294 | 0 | NA    | PTER     | PTER     |
| PTPRK    | 4.7632103  | 0.3977537  | 0 | NA    | PTPRK    | PTPRK    |
| QDPR     | -2.1979566 | 1.33072736 | 0 | NA    | QDPR     | QDPR     |
| RAB7L1   | 3.8609759  | 0.56498331 | 0 | NA    | RAB7L1   | RAB7L1   |
| RGS20    | 2.36348    | 0.71130303 | 0 | NA    | RGS20    | RGS20    |
| RNF182   | 4.7106408  | 0.47962861 | 0 | NA    | RNF182   | RNF182   |
| ROBO2    | 5.3895655  | 0.46474463 | 0 | NA    | ROBO2    | ROBO2    |
| RPRM     | -3.0311581 | 2.03229418 | 0 | NA    | RPRM     | RPRM     |
| SFRP1    | -3.1715505 | 1.60973547 | 0 | NA    | SFRP1    | SFRP1    |
| SFRP2    | -2.9745118 | 1.69062342 | 0 | NA    | SFRP2    | SFRP2    |
| SLC16A1  | 3.2925757  | 0.59571496 | 0 | NA    | SLC16A1  | NA       |
| SLC6A15  | 2.7910928  | 0.67529137 | 0 | NA    | SLC6A15  | SLC6A15  |
| SLCO3A1  | -2.3528977 | 1.73020418 | 0 | NA    | SLCO3A1  | SLCO3A1  |
| SLIT2    | -3.0879381 | 1.56586266 | 0 | NA    | SLIT2    | SLIT2    |
| SORCS1   | 4.3988439  | 0.48451882 | 0 | NA    | SORCS1   | SORCS1   |
| SPON1    | 5.0932677  | 0.30520412 | 0 | NA    | SPON1    | SPON1    |
| ST8SIA3  | -2.4241874 | 1.47965344 | 0 | NA    | ST8SIA3  | ST8SIA3  |
| STXBP6   | -7.5596973 | 3.29939452 | 0 | NA    | STXBP6   | STXBP6   |
| SULF2    | -4.7353515 | 2.57250946 | 0 | NA    | SULF2    | SULF2    |
| SYNE1    | 2.7432808  | 0.71460998 | 0 | NA    | SYNE1    | SYNE1    |
| SYNM     | -3.2827036 | 1.63034073 | 0 | NA    | SYNM     | SYNM     |
| TLE1     | 9.2333799  | 0.33331922 | 0 | NA    | TLE1     | TLE1     |
| TMCC2    | 2.363984   | 0.72802771 | 0 | NA    | TMCC2    | TMCC2    |
| TNFAIP8  | 2.5452211  | 0.57765687 | 0 | NA    | TNFAIP8  | NA       |
| TOX      | -6.2470255 | 3.16050207 | 0 | NA    | TOX      | TOX      |
| TPBG     | -2.3870222 | 1.57377889 | 0 | NA    | TPBG     | TPBG     |
| TRH      | -4.3485877 | 1.92544255 | 0 | NA    | TRH      | TRH      |
| WBSCR17  | -3.4505242 | 1.54274478 | 0 | NA    | WBSCR17  | WBSCR17  |
| WNT11    | -2.185204  | 1.57874503 | 0 | NA    | WNT11    | WNT11    |
| ZNF238   | 2.8390867  | 0.596913   | 0 | NA    | ZNF238   | ZNF238   |
| ZNF423   | -6.9022481 | 4.59746511 | 0 | NA    | ZNF423   | ZNF423   |
| NCAM2    | 3.8690279  | 0.48696699 | 0 | NCAM2 | NCAM2    | NCAM2    |
| OPCML    | 3.7307845  | 0.52898093 | 0 | OPCML | OPCML    | OPCML    |
| PART1    | -4.6456628 | 2.46597251 | 0 | PART1 | PART1    | PART1    |

|            |            |            |            |            |            |            |
|------------|------------|------------|------------|------------|------------|------------|
| PCDH7      | 4.9943541  | 0.52826125 | 0          | PCDH7      | PCDH7      | PCDH7      |
| PCDH9      | 5.6119571  | 0.38338733 | 0          | PCDH9      | PCDH9      | PCDH9      |
| POU3F3     | -2.3728614 | 1.478081   | 0          | POU3F3     | POU3F3     | POU3F3     |
| PRAGMIN    | -5.4987885 | 2.1050636  | 0          | PRAGMIN    | PRAGMIN    | PRAGMIN    |
| PRR16      | 7.3717628  | 0.20836697 | 0          | PRR16      | PRR16      | PRR16      |
| ROBO1      | -2.1733223 | 1.36044369 | 0          | ROBO1      | ROBO1      | ROBO1      |
| SORCS3     | 3.7751832  | 0.46911502 | 0          | SORCS3     | SORCS3     | SORCS3     |
| SOX8       | 2.2105106  | 0.62278216 | 0          | SOX8       | SOX8       | NA         |
| ST6GALNAC5 | -6.0992162 | 2.36657776 | 0          | ST6GALNAC5 | ST6GALNAC5 | ST6GALNAC5 |
| TFAP2D     | -3.5078229 | 3.65801776 | 0          | TFAP2D     | TFAP2D     | TFAP2D     |
| TRHDE      | 7.4632306  | 0.22727706 | 0          | TRHDE      | TRHDE      | TRHDE      |
| YES1       | -3.7572556 | 1.84409437 | 0          | YES1       | YES1       | YES1       |
| ZBTB20     | -2.2143973 | 1.32042789 | 0          | ZBTB20     | ZBTB20     | ZBTB20     |
| ARAP2      | 2.1194073  | 0.7517203  | 0.11329523 | ARAP2      | ARAP2      | ARAP2      |
| ARHGAP15   | 2.0953211  | 0.73642574 | 0.11329523 | ARHGAP15   | ARHGAP15   | ARHGAP15   |
| EFNB2      | 2.0686762  | 0.67820706 | 0.11329523 | EFNB2      | EFNB2      | EFNB2      |
| ELAVL2     | -2.000231  | 1.49945115 | 0.11329523 | ELAVL2     | ELAVL2     | ELAVL2     |
| FLJ42709   | 2.0428552  | 0.71173922 | 0.11329523 | FLJ42709   | FLJ42709   | FLJ42709   |
| GLIS3      | -2.1030173 | 1.66495303 | 0.11329523 | GLIS3      | GLIS3      | GLIS3      |
| ASAM       | -2.1306034 | 1.62637404 | 0.11329523 | NA         | ASAM       | NA         |
| C13orf18   | 2.0554786  | 0.66207045 | 0.11329523 | NA         | C13orf18   | NA         |
| C5orf4     | 2.0449505  | 0.75038304 | 0.11329523 | NA         | C5orf4     | C5orf4     |
| DPF3       | -1.9948572 | 1.32280327 | 0.11329523 | NA         | DPF3       | DPF3       |
| EIF3E      | 2.1041583  | 0.79564492 | 0.11329523 | NA         | EIF3E      | EIF3E      |
| GGTA1      | -2.1053034 | 1.54639322 | 0.11329523 | NA         | GGTA1      | GGTA1      |
| GOLGA7B    | -2.1550231 | 1.44318056 | 0.11329523 | NA         | GOLGA7B    | GOLGA7B    |
| GPAM       | 2.140471   | 0.68699697 | 0.11329523 | NA         | GPAM       | GPAM       |
| GRIK2      | -2.1000341 | 1.32784063 | 0.11329523 | NA         | GRIK2      | GRIK2      |
| GRM7       | -1.9945815 | 1.33335681 | 0.11329523 | NA         | GRM7       | GRM7       |
| HSPB3      | -2.111997  | 1.51116191 | 0.11329523 | NA         | HSPB3      | HSPB3      |
| HTR7       | 2.0742972  | 0.71424476 | 0.11329523 | NA         | HTR7       | HTR7       |
| PLP2       | 2.1639678  | 0.71837011 | 0.11329523 | NA         | PLP2       | NA         |
| SATB2      | 2.0138674  | 0.6652304  | 0.11329523 | NA         | SATB2      | SATB2      |
| SH3BP4     | -2.1323932 | 1.35398485 | 0.11329523 | NA         | SH3BP4     | SH3BP4     |
| TARBP1     | 2.0160223  | 0.77167533 | 0.11329523 | NA         | TARBP1     | TARBP1     |
| TBX21      | -2.0951755 | 1.50634971 | 0.11329523 | NA         | TBX21      | TBX21      |
| RPS6KA3    | 2.0394529  | 0.74879937 | 0.11329523 | RPS6KA3    | RPS6KA3    | RPS6KA3    |
| C8orf83    | 1.9837388  | 0.75462987 | 0.19206239 | C8orf83    | C8orf83    | C8orf83    |
| CNTNAP5    | 1.8672665  | 0.7789539  | 0.19206239 | CNTNAP5    | CNTNAP5    | CNTNAP5    |
| ETV1       | 1.8694001  | 0.72920593 | 0.19206239 | ETV1       | ETV1       | ETV1       |
| FAM84A     | 1.882711   | 0.74357273 | 0.19206239 | FAM84A     | FAM84A     | FAM84A     |
| FANCL      | 1.9582831  | 0.77641708 | 0.19206239 | FANCL      | FANCL      | FANCL      |
| FBXL17     | 1.8906911  | 0.71481587 | 0.19206239 | FBXL17     | FBXL17     | FBXL17     |
| GRIA3      | 1.848451   | 0.74980662 | 0.19206239 | GRIA3      | GRIA3      | GRIA3      |
| MGST1      | 1.8604752  | 0.70169159 | 0.19206239 | MGST1      | MGST1      | MGST1      |
| ACVR1      | 1.9016813  | 0.74909317 | 0.19206239 | NA         | ACVR1      | ACVR1      |
| AKAP13     | 1.8672226  | 0.77684803 | 0.19206239 | NA         | AKAP13     | AKAP13     |
| ASS1       | -1.8757098 | 1.36348358 | 0.19206239 | NA         | ASS1       | ASS1       |
| C9orf45    | 1.9496523  | 0.75910403 | 0.19206239 | NA         | C9orf45    | C9orf45    |
| CCDC110    | 1.8985224  | 0.67066792 | 0.19206239 | NA         | CCDC110    | NA         |
| CYYR1      | -1.8344824 | 1.39509513 | 0.19206239 | NA         | CYYR1      | CYYR1      |
| DPP3       | -1.8794705 | 1.2852484  | 0.19206239 | NA         | DPP3       | DPP3       |
| DPYD       | 1.91158    | 0.75716218 | 0.19206239 | NA         | DPYD       | DPYD       |
| HS3ST2     | -1.9807592 | 1.51306092 | 0.19206239 | NA         | HS3ST2     | HS3ST2     |
| KLHL14     | -1.8384008 | 1.35188201 | 0.19206239 | NA         | KLHL14     | KLHL14     |
| KLHL21     | 1.8221708  | 0.7030475  | 0.19206239 | NA         | KLHL21     | NA         |
| LOC151009  | 1.9328236  | 0.70324145 | 0.19206239 | NA         | LOC151009  | NA         |
| NGEF       | 1.9272593  | 0.79921309 | 0.19206239 | NA         | NGEF       | NA         |

|          |            |            |            |         |          |          |
|----------|------------|------------|------------|---------|----------|----------|
| NOS1     | -1.9311619 | 1.2985339  | 0.19206239 | NA      | NOS1     | NOS1     |
| PLOD2    | 1.8199163  | 0.63535707 | 0.19206239 | NA      | PLOD2    | PLOD2    |
| RLIM     | 1.8984403  | 0.79797798 | 0.19206239 | NA      | RLIM     | NA       |
| RSL24D1  | 1.9607116  | 0.76287592 | 0.19206239 | NA      | RSL24D1  | RSL24D1  |
| SLC22A15 | -1.8528495 | 1.3029058  | 0.19206239 | NA      | SLC22A15 | NA       |
| SNX9     | 1.8759538  | 0.72844561 | 0.19206239 | NA      | SNX9     | SNX9     |
| TMEM111  | 1.8818937  | 0.74576381 | 0.19206239 | NA      | TMEM111  | NA       |
| ZADH2    | -1.9388644 | 1.33605933 | 0.19206239 | NA      | ZADH2    | ZADH2    |
| ZBTB44   | 1.92715    | 0.78897914 | 0.19206239 | NA      | ZBTB44   | NA       |
| ZNF706   | -1.8489992 | 1.22405684 | 0.19206239 | NA      | ZNF706   | ZNF706   |
| NLGN1    | 1.9729994  | 0.70393173 | 0.19206239 | NLGN1   | NLGN1    | NLGN1    |
| PARP8    | -1.8990028 | 1.45305744 | 0.19206239 | PARP8   | PARP8    | PARP8    |
| POU3F1   | -1.895519  | 1.42385159 | 0.19206239 | POU3F1  | POU3F1   | POU3F1   |
| PRKD1    | -1.9272667 | 1.32258417 | 0.19206239 | PRKD1   | PRKD1    | PRKD1    |
| SATB1    | 1.8658506  | 0.79817306 | 0.19206239 | SATB1   | SATB1    | SATB1    |
| XYLT1    | 1.9222051  | 0.80021924 | 0.19206239 | XYLT1   | XYLT1    | XYLT1    |
| CA8      | -1.7263499 | 1.23979534 | 0.56921718 | CA8     | CA8      | CA8      |
| CDH11    | -1.6807595 | 1.26770628 | 0.56921718 | CDH11   | CDH11    | CDH11    |
| DCTD     | -1.7916642 | 1.25421313 | 0.56921718 | DCTD    | DCTD     | DCTD     |
| DIO2     | -1.6845813 | 1.34564495 | 0.56921718 | DIO2    | DIO2     | DIO2     |
| LRRTM1   | -1.7425734 | 1.47680773 | 0.56921718 | LRRTM1  | LRRTM1   | LRRTM1   |
| AMOTL1   | -1.6708045 | 1.2233893  | 0.56921718 | NA      | AMOTL1   | AMOTL1   |
| C1orf201 | 1.6867839  | 0.76162761 | 0.56921718 | NA      | C1orf201 | C1orf201 |
| CHGB     | 1.6889775  | 0.80786526 | 0.56921718 | NA      | CHGB     | CHGB     |
| CIDEA    | 1.6688155  | 0.73169435 | 0.56921718 | NA      | CIDEA    | NA       |
| DIAPH3   | -1.691133  | 1.316908   | 0.56921718 | NA      | DIAPH3   | DIAPH3   |
| DUSP6    | -1.6648534 | 1.34244361 | 0.56921718 | NA      | DUSP6    | DUSP6    |
| FBXL4    | 1.7030863  | 0.74322208 | 0.56921718 | NA      | FBXL4    | FBXL4    |
| FOSL2    | -1.8048882 | 1.39235042 | 0.56921718 | NA      | FOSL2    | FOSL2    |
| GRM3     | 1.7963915  | 0.79517321 | 0.56921718 | NA      | GRM3     | GRM3     |
| ID4      | -1.714183  | 1.24941014 | 0.56921718 | NA      | ID4      | ID4      |
| LRRC4C   | 1.7723172  | 0.78380855 | 0.56921718 | NA      | LRRC4C   | LRRC4C   |
| MAOA     | -1.7230175 | 1.26439033 | 0.56921718 | NA      | MAOA     | MAOA     |
| MIAT     | 1.6685052  | 0.7468721  | 0.56921718 | NA      | MIAT     | MIAT     |
| MXRA7    | -1.7854284 | 1.28071002 | 0.56921718 | NA      | MXRA7    | NA       |
| NGB      | 1.6973064  | 0.81316304 | 0.56921718 | NA      | NGB      | NGB      |
| NINJ1    | 1.6946936  | 0.79883026 | 0.56921718 | NA      | NINJ1    | NA       |
| NR2F2    | 1.6810585  | 0.78707751 | 0.56921718 | NA      | NR2F2    | NR2F2    |
| NRXN3    | -1.6779785 | 1.23251032 | 0.56921718 | NA      | NRXN3    | NRXN3    |
| PLXNC1   | -1.7689523 | 1.29644548 | 0.56921718 | NA      | PLXNC1   | PLXNC1   |
| RAPGEFL1 | 1.7176713  | 0.71074745 | 0.56921718 | NA      | RAPGEFL1 | RAPGEFL1 |
| RUNX2    | -1.6858028 | 1.28467826 | 0.56921718 | NA      | RUNX2    | RUNX2    |
| SMAD3    | 1.7388772  | 0.78593321 | 0.56921718 | NA      | SMAD3    | SMAD3    |
| TMIGD2   | 1.7168483  | 0.7748928  | 0.56921718 | NA      | TMIGD2   | NA       |
| ZAK      | 1.670217   | 0.71519869 | 0.56921718 | NA      | ZAK      | ZAK      |
| ZHX2     | 1.7521996  | 0.76600304 | 0.56921718 | NA      | ZHX2     | ZHX2     |
| PTPRG    | 1.7029704  | 0.73794978 | 0.56921718 | PTPRG   | PTPRG    | PTPRG    |
| RAP1GAP  | 1.7936958  | 0.72250668 | 0.56921718 | RAP1GAP | RAP1GAP  | RAP1GAP  |
| SLC35F4  | -1.7080815 | 1.50640057 | 0.56921718 | SLC35F4 | SLC35F4  | SLC35F4  |
| VRK2     | 1.6716374  | 0.6899739  | 0.56921718 | VRK2    | VRK2     | VRK2     |
| ZNF703   | -1.7219587 | 1.2649145  | 0.56921718 | ZNF703  | ZNF703   | ZNF703   |
| CADM1    | 1.5423172  | 0.78415892 | 0.88419955 | CADM1   | CADM1    | CADM1    |
| CADM2    | 1.6480507  | 0.78473465 | 0.88419955 | CADM2   | CADM2    | CADM2    |
| CDC73    | 1.5686281  | 0.79791535 | 0.88419955 | CDC73   | CDC73    | CDC73    |
| CSMD1    | -1.6330538 | 1.2029593  | 0.88419955 | CSMD1   | CSMD1    | NA       |
| EFNA5    | 1.6238383  | 0.80556294 | 0.88419955 | EFNA5   | EFNA5    | EFNA5    |
| HNMT     | 1.6412867  | 0.77996165 | 0.88419955 | HNMT    | HNMT     | HNMT     |
| KIF16B   | 1.6187313  | 0.77976982 | 0.88419955 | KIF16B  | KIF16B   | KIF16B   |

|           |            |            |            |           |           |           |
|-----------|------------|------------|------------|-----------|-----------|-----------|
| LMO1      | 1.5536779  | 0.74571502 | 0.88419955 | LMO1      | LMO1      | LMO1      |
| LOC220930 | 1.5258504  | 0.73363307 | 0.88419955 | LOC220930 | LOC220930 | LOC220930 |
| LRRC37A   | 1.5081892  | 0.70175357 | 0.88419955 | LRRC37A   | LRRC37A   | NA        |
| AUH       | 1.5088174  | 0.79367185 | 0.88419955 | NA        | AUH       | AUH       |
| CDH13     | 1.5766612  | 0.71012446 | 0.88419955 | NA        | CDH13     | CDH13     |
| CLCN4     | -1.6496394 | 1.35400775 | 0.88419955 | NA        | CLCN4     | CLCN4     |
| CPLX3     | 1.6128539  | 0.80616955 | 0.88419955 | NA        | CPLX3     | NA        |
| CRIPAK    | 1.5992703  | 0.7591401  | 0.88419955 | NA        | CRIPAK    | NA        |
| DCC       | -1.5468003 | 1.25641969 | 0.88419955 | NA        | DCC       | DCC       |
| DMXL1     | 1.5936059  | 0.79464748 | 0.88419955 | NA        | DMXL1     | DMXL1     |
| DNMT3A    | -1.6393412 | 1.26259462 | 0.88419955 | NA        | DNMT3A    | DNMT3A    |
| KBTBD8    | 1.5720203  | 0.79932808 | 0.88419955 | NA        | KBTBD8    | KBTBD8    |
| KIAA1958  | -1.5262747 | 1.26307324 | 0.88419955 | NA        | KIAA1958  | KIAA1958  |
| MARK1     | 1.5520661  | 0.80040881 | 0.88419955 | NA        | MARK1     | MARK1     |
| MDH1      | 1.6458122  | 0.7827652  | 0.88419955 | NA        | MDH1      | MDH1      |
| MITF      | 1.626352   | 0.7826945  | 0.88419955 | NA        | MITF      | MITF      |
| MYO1B     | -1.6535742 | 1.26905342 | 0.88419955 | NA        | MYO1B     | MYO1B     |
| PREB      | -1.5009519 | 1.19427223 | 0.88419955 | NA        | PREB      | NA        |
| PRKCB     | 1.623504   | 0.7653644  | 0.88419955 | NA        | PRKCB     | PRKCB     |
| PSRC1     | -1.6109387 | 1.34653818 | 0.88419955 | NA        | PSRC1     | NA        |
| SCO2      | -1.6514943 | 1.26470566 | 0.88419955 | NA        | SCO2      | NA        |
| SEPX1     | -1.5896316 | 1.26272394 | 0.88419955 | NA        | SEPX1     | NA        |
| SH3KBP1   | 1.6217678  | 0.81439028 | 0.88419955 | NA        | SH3KBP1   | SH3KBP1   |
| SMAD7     | 1.5822772  | 0.77254442 | 0.88419955 | NA        | SMAD7     | SMAD7     |
| SPRED2    | -1.5160014 | 1.21935135 | 0.88419955 | NA        | SPRED2    | SPRED2    |
| STAG2     | 1.5384991  | 0.80153576 | 0.88419955 | NA        | STAG2     | STAG2     |
| SYT13     | 1.5262234  | 0.77492133 | 0.88419955 | NA        | SYT13     | SYT13     |
| TDP1      | -1.6031528 | 1.24968789 | 0.88419955 | NA        | TDP1      | TDP1      |
| TMEM47    | -1.6560851 | 1.2938101  | 0.88419955 | NA        | TMEM47    | TMEM47    |
| TMEM5     | -1.5773597 | 1.27996903 | 0.88419955 | NA        | TMEM5     | TMEM5     |
| TP53BP2   | 1.5084482  | 0.80778045 | 0.88419955 | NA        | TP53BP2   | NA        |
| ZNF395    | -1.598808  | 1.21514445 | 0.88419955 | NA        | ZNF395    | ZNF395    |
| PTPRD     | 1.601349   | 0.82378207 | 0.88419955 | PTPRD     | PTPRD     | PTPRD     |
| UNC5C     | 1.5826048  | 0.82539105 | 0.88419955 | UNC5C     | UNC5C     | UNC5C     |

## **CAR-HAR PFOvsPT q<0.01**

| <b>SYMBOL</b> | <b>PFOvsPT.d</b> | <b>PFOvsPT.FC</b> | <b>PFOvsPT.q</b> | <b>HAR</b> | <b>CAR</b> | <b>MAR</b> |
|---------------|------------------|-------------------|------------------|------------|------------|------------|
| ACCN1         | -2.6307648       | 1.67979598        | 0                | NA         | ACCN1      | ACCN1      |
| ADAMTS16      | -2.3622011       | 1.76005451        | 0                | NA         | ADAMTS16   | ADAMTS16   |
| AK5           | 2.4672315        | 0.67898931        | 0                | NA         | AK5        | AK5        |
| ANKRD32       | -5.2441495       | 2.29550366        | 0                | NA         | ANKRD32    | ANKRD32    |
| APOO          | -2.2526913       | 1.32642345        | 0                | NA         | APOO       | APOO       |
| ARNTL         | 2.5357596        | 0.65285149        | 0                | NA         | ARNTL      | ARNTL      |
| CACNA2D3      | -5.0183639       | 2.37311616        | 0                | NA         | CACNA2D3   | CACNA2D3   |
| CBLN1         | -7.7041147       | 4.80719481        | 0                | NA         | CBLN1      | CBLN1      |
| CCDC109A      | -2.989666        | 1.63539425        | 0                | NA         | CCDC109A   | CCDC109A   |
| CDH12         | -3.0931634       | 1.70193601        | 0                | NA         | CDH12      | CDH12      |
| CDH9          | 3.3472538        | 0.50238639        | 0                | NA         | CDH9       | CDH9       |
| CEP120        | -2.8706623       | 1.55083986        | 0                | NA         | CEP120     | CEP120     |
| CGRRF1        | -4.1255188       | 2.23860247        | 0                | NA         | CGRRF1     | CGRRF1     |
| CNTN3         | -5.1226552       | 2.1416389         | 0                | NA         | CNTN3      | CNTN3      |
| COX7A1        | 3.6220653        | 0.49840726        | 0                | NA         | COX7A1     | COX7A1     |
| CPNE8         | -7.9019211       | 5.45090012        | 0                | NA         | CPNE8      | CPNE8      |
| CTNNBL1       | -5.1701204       | 2.60508807        | 0                | NA         | CTNNBL1    | CTNNBL1    |

|           |            |            |   |    |           |           |
|-----------|------------|------------|---|----|-----------|-----------|
| CTXN3     | -3.1547723 | 2.02249669 | 0 | NA | CTXN3     | CTXN3     |
| CXorf1    | 3.5295083  | 0.5214482  | 0 | NA | CXorf1    | CXorf1    |
| DACH2     | 5.3983733  | 0.39389626 | 0 | NA | DACH2     | DACH2     |
| DACT1     | 3.7612088  | 0.6514341  | 0 | NA | DACT1     | DACT1     |
| DGKI      | 2.8821568  | 0.44509385 | 0 | NA | DGKI      | DGKI      |
| DLG1      | 3.1684757  | 0.60089689 | 0 | NA | DLG1      | DLG1      |
| DOK5      | 3.4689382  | 0.68277451 | 0 | NA | DOK5      | DOK5      |
| DYRK2     | 2.3302515  | 0.68671835 | 0 | NA | DYRK2     | DYRK2     |
| EPHA4     | -2.3288721 | 1.52144273 | 0 | NA | EPHA4     | EPHA4     |
| FAM19A5   | -2.2537914 | 1.36434919 | 0 | NA | FAM19A5   | FAM19A5   |
| FAM5B     | -2.7524322 | 1.60087371 | 0 | NA | FAM5B     | FAM5B     |
| FGF12     | -3.1985688 | 1.60028385 | 0 | NA | FGF12     | FGF12     |
| FGF14     | -4.161336  | 1.89013512 | 0 | NA | FGF14     | FGF14     |
| FLJ43390  | -9.7499031 | 5.56194442 | 0 | NA | FLJ43390  | FLJ43390  |
| FLRT3     | -6.0329061 | 2.31581298 | 0 | NA | FLRT3     | FLRT3     |
| FRMPD4    | 2.6700364  | 0.72369361 | 0 | NA | FRMPD4    | FRMPD4    |
| GABRA1    | -2.4861275 | 1.5458172  | 0 | NA | GABRA1    | GABRA1    |
| GABRA5    | 4.1635031  | 0.57212962 | 0 | NA | GABRA5    | GABRA5    |
| GABRG2    | -2.500529  | 1.35616898 | 0 | NA | GABRG2    | GABRG2    |
| GAS1      | -2.8207017 | 1.43925682 | 0 | NA | GAS1      | GAS1      |
| GOLSYN    | 3.3184939  | 0.65282491 | 0 | NA | GOLSYN    | GOLSYN    |
| GRB14     | 2.5728727  | 0.49303609 | 0 | NA | GRB14     | GRB14     |
| H2AFY2    | -2.909317  | 1.40106706 | 0 | NA | H2AFY2    | H2AFY2    |
| HLF       | 4.0234794  | 0.4754812  | 0 | NA | HLF       | HLF       |
| ID2       | 3.8786506  | 0.44944894 | 0 | NA | ID2       | ID2       |
| IGFBP4    | 2.3828134  | 0.68418134 | 0 | NA | IGFBP4    | IGFBP4    |
| IGFBP5    | -2.834741  | 1.61843461 | 0 | NA | IGFBP5    | IGFBP5    |
| IGSF11    | -7.5561874 | 3.09731621 | 0 | NA | IGSF11    | IGSF11    |
| KIAA0182  | 2.8095351  | 0.6575132  | 0 | NA | KIAA0182  | KIAA0182  |
| KLF6      | -2.7404503 | 1.42932138 | 0 | NA | KLF6      | KLF6      |
| LGALS8    | 2.2259948  | 0.72480252 | 0 | NA | LGALS8    | LGALS8    |
| LHFP      | 3.3336246  | 0.60532507 | 0 | NA | LHFP      | LHFP      |
| LMO3      | -2.4423344 | 1.621965   | 0 | NA | LMO3      | LMO3      |
| LMO4      | -5.4333042 | 2.09762329 | 0 | NA | LMO4      | LMO4      |
| LOC150568 | -4.5808282 | 2.16132196 | 0 | NA | LOC150568 | LOC150568 |
| LOC283392 | 3.2109194  | 0.58737246 | 0 | NA | LOC283392 | LOC283392 |
| LOC645323 | 2.2641538  | 0.74917028 | 0 | NA | LOC645323 | LOC645323 |
| LOC653786 | 2.4826133  | 0.66960833 | 0 | NA | LOC653786 | LOC653786 |
| LRRTM4    | 5.9239675  | 0.23561301 | 0 | NA | LRRTM4    | LRRTM4    |
| MAMLD1    | -2.732106  | 1.53315954 | 0 | NA | MAMLD1    | MAMLD1    |
| MARCH3    | -5.561013  | 1.98423491 | 0 | NA | MARCH3    | MARCH3    |
| MAST4     | -4.5965819 | 1.89897414 | 0 | NA | MAST4     | MAST4     |
| MC4R      | -2.7448307 | 2.07739068 | 0 | NA | MC4R      | MC4R      |
| MDGA1     | -2.3368477 | 1.47049165 | 0 | NA | MDGA1     | MDGA1     |
| MID1      | 3.3365625  | 0.56004233 | 0 | NA | MID1      | MID1      |
| MOSC1     | -2.4501897 | 1.4052336  | 0 | NA | MOSC1     | MOSC1     |
| ARHGDIB   | -2.6187164 | 1.37947451 | 0 | NA | ARHGDIB   | NA        |
| CACNA1A   | -5.7244908 | 2.02037437 | 0 | NA | CACNA1A   | NA        |
| CNKSR3    | -5.9495054 | 2.9706848  | 0 | NA | CNKSR3    | NA        |
| CYP27C1   | -4.0171215 | 2.88173718 | 0 | NA | CYP27C1   | NA        |
| DCBLD1    | 2.2063284  | 0.71430327 | 0 | NA | DCBLD1    | NA        |
| DNAH10    | -2.8406866 | 1.5059201  | 0 | NA | DNAH10    | NA        |
| FSIP1     | 3.2066337  | 0.54366788 | 0 | NA | FSIP1     | NA        |
| MEIS3P1   | -4.0994783 | 3.16136077 | 0 | NA | MEIS3P1   | NA        |
| PKIG      | -2.4710853 | 1.51923202 | 0 | NA | PKIG      | NA        |
| PLAGL1    | 2.7294518  | 0.62240269 | 0 | NA | PLAGL1    | NA        |
| SLC16A1   | 3.2925757  | 0.59571496 | 0 | NA | SLC16A1   | NA        |
| TNFAIP8   | 2.5452211  | 0.57765687 | 0 | NA | TNFAIP8   | NA        |



|          |            |            |            |    |          |          |
|----------|------------|------------|------------|----|----------|----------|
| NDP      | -4.9907327 | 3.07052035 | 0          | NA | NDP      | NDP      |
| NOG      | -3.1842631 | 2.05302024 | 0          | NA | NOG      | NOG      |
| NR3C1    | 3.9886444  | 0.55590161 | 0          | NA | NR3C1    | NR3C1    |
| NR3C2    | 6.2948111  | 0.35436521 | 0          | NA | NR3C2    | NR3C2    |
| NR4A2    | 5.3728796  | 0.31034033 | 0          | NA | NR4A2    | NR4A2    |
| NTNG2    | 5.0387291  | 0.27228346 | 0          | NA | NTNG2    | NTNG2    |
| NXPH3    | 3.2378358  | 0.63766383 | 0          | NA | NXPH3    | NXPH3    |
| ODZ4     | 2.4831271  | 0.71491135 | 0          | NA | ODZ4     | ODZ4     |
| OLFM3    | -2.3427178 | 1.60992788 | 0          | NA | OLFM3    | OLFM3    |
| PBX3     | 2.6304097  | 0.71030199 | 0          | NA | PBX3     | PBX3     |
| PCDH17   | -5.0671224 | 2.34152922 | 0          | NA | PCDH17   | PCDH17   |
| PCDH18   | -2.4106968 | 1.50798322 | 0          | NA | PCDH18   | PCDH18   |
| PCSK9    | 2.8585448  | 0.66795293 | 0          | NA | PCSK9    | PCSK9    |
| PDE4DIP  | 2.650362   | 0.69291976 | 0          | NA | PDE4DIP  | PDE4DIP  |
| PDZRN4   | -5.4476486 | 2.63707924 | 0          | NA | PDZRN4   | PDZRN4   |
| PHLDA1   | -4.0501691 | 1.65922624 | 0          | NA | PHLDA1   | PHLDA1   |
| PIK3AP1  | 2.7624911  | 0.64434479 | 0          | NA | PIK3AP1  | PIK3AP1  |
| PPARGC1A | 2.5259817  | 0.69605157 | 0          | NA | PPARGC1A | PPARGC1A |
| PSD2     | -2.1802477 | 1.30380301 | 0          | NA | PSD2     | PSD2     |
| PTER     | -3.937988  | 2.21395294 | 0          | NA | PTER     | PTER     |
| PTPRK    | 4.7632103  | 0.3977537  | 0          | NA | PTPRK    | PTPRK    |
| QDPR     | -2.1979566 | 1.33072736 | 0          | NA | QDPR     | QDPR     |
| RAB7L1   | 3.8609759  | 0.56498331 | 0          | NA | RAB7L1   | RAB7L1   |
| RGS20    | 2.36348    | 0.71130303 | 0          | NA | RGS20    | RGS20    |
| RNF182   | 4.7106408  | 0.47962861 | 0          | NA | RNF182   | RNF182   |
| ROBO2    | 5.3895655  | 0.46474463 | 0          | NA | ROBO2    | ROBO2    |
| RPRM     | -3.0311581 | 2.03229418 | 0          | NA | RPRM     | RPRM     |
| SFRP1    | -3.1715505 | 1.60973547 | 0          | NA | SFRP1    | SFRP1    |
| SFRP2    | -2.9745118 | 1.69062342 | 0          | NA | SFRP2    | SFRP2    |
| SLC6A15  | 2.7910928  | 0.67529137 | 0          | NA | SLC6A15  | SLC6A15  |
| SLCO3A1  | -2.3528977 | 1.73020418 | 0          | NA | SLCO3A1  | SLCO3A1  |
| SLIT2    | -3.0879381 | 1.56586266 | 0          | NA | SLIT2    | SLIT2    |
| SORCS1   | 4.3988439  | 0.48451882 | 0          | NA | SORCS1   | SORCS1   |
| SPON1    | 5.0932677  | 0.30520412 | 0          | NA | SPON1    | SPON1    |
| ST8SIA3  | -2.4241874 | 1.47965344 | 0          | NA | ST8SIA3  | ST8SIA3  |
| STXBP6   | -7.5596973 | 3.29939452 | 0          | NA | STXBP6   | STXBP6   |
| SULF2    | -4.7353515 | 2.57250946 | 0          | NA | SULF2    | SULF2    |
| SYNE1    | 2.7432808  | 0.71460998 | 0          | NA | SYNE1    | SYNE1    |
| SYNM     | -3.2827036 | 1.63034073 | 0          | NA | SYNM     | SYNM     |
| TLE1     | 9.2333799  | 0.33331922 | 0          | NA | TLE1     | TLE1     |
| TMCC2    | 2.363984   | 0.72802771 | 0          | NA | TMCC2    | TMCC2    |
| TOX      | -6.2470255 | 3.16050207 | 0          | NA | TOX      | TOX      |
| TPBG     | -2.3870222 | 1.57377889 | 0          | NA | TPBG     | TPBG     |
| TRH      | -4.3485877 | 1.92544255 | 0          | NA | TRH      | TRH      |
| WBSCR17  | -3.4505242 | 1.54274478 | 0          | NA | WBSCR17  | WBSCR17  |
| WNT11    | -2.185204  | 1.57874503 | 0          | NA | WNT11    | WNT11    |
| ZNF238   | 2.8390867  | 0.596913   | 0          | NA | ZNF238   | ZNF238   |
| ZNF423   | -6.9022481 | 4.59746511 | 0          | NA | ZNF423   | ZNF423   |
| C5orf4   | 2.0449505  | 0.75038304 | 0.11329523 | NA | C5orf4   | C5orf4   |
| DPF3     | -1.9948572 | 1.32280327 | 0.11329523 | NA | DPF3     | DPF3     |
| EIF3E    | 2.1041583  | 0.79564492 | 0.11329523 | NA | EIF3E    | EIF3E    |
| GGTA1    | -2.1053034 | 1.54639322 | 0.11329523 | NA | GGTA1    | GGTA1    |
| GOLGA7B  | -2.1550231 | 1.44318056 | 0.11329523 | NA | GOLGA7B  | GOLGA7B  |
| GPAM     | 2.140471   | 0.68699697 | 0.11329523 | NA | GPAM     | GPAM     |
| GRIK2    | -2.1000341 | 1.32784063 | 0.11329523 | NA | GRIK2    | GRIK2    |
| GRM7     | -1.9945815 | 1.33335681 | 0.11329523 | NA | GRM7     | GRM7     |
| HSPB3    | -2.111997  | 1.51116191 | 0.11329523 | NA | HSPB3    | HSPB3    |
| HTR7     | 2.0742972  | 0.71424476 | 0.11329523 | NA | HTR7     | HTR7     |

|           |            |            |            |    |           |          |
|-----------|------------|------------|------------|----|-----------|----------|
| ASAM      | -2.1306034 | 1.62637404 | 0.11329523 | NA | ASAM      | NA       |
| C13orf18  | 2.0554786  | 0.66207045 | 0.11329523 | NA | C13orf18  | NA       |
| PLP2      | 2.1639678  | 0.71837011 | 0.11329523 | NA | PLP2      | NA       |
| SATB2     | 2.0138674  | 0.6652304  | 0.11329523 | NA | SATB2     | SATB2    |
| SH3BP4    | -2.1323932 | 1.35398485 | 0.11329523 | NA | SH3BP4    | SH3BP4   |
| TARBP1    | 2.0160223  | 0.77167533 | 0.11329523 | NA | TARBP1    | TARBP1   |
| TBX21     | -2.0951755 | 1.50634971 | 0.11329523 | NA | TBX21     | TBX21    |
| ACVR1     | 1.9016813  | 0.74909317 | 0.19206239 | NA | ACVR1     | ACVR1    |
| AKAP13    | 1.8672226  | 0.77684803 | 0.19206239 | NA | AKAP13    | AKAP13   |
| ASS1      | -1.8757098 | 1.36348358 | 0.19206239 | NA | ASS1      | ASS1     |
| C9orf45   | 1.9496523  | 0.75910403 | 0.19206239 | NA | C9orf45   | C9orf45  |
| CYYR1     | -1.8344824 | 1.39509513 | 0.19206239 | NA | CYYR1     | CYYR1    |
| DPP3      | -1.8794705 | 1.2852484  | 0.19206239 | NA | DPP3      | DPP3     |
| DPYD      | 1.91158    | 0.75716218 | 0.19206239 | NA | DPYD      | DPYD     |
| HS3ST2    | -1.9807592 | 1.51306092 | 0.19206239 | NA | HS3ST2    | HS3ST2   |
| KLHL14    | -1.8384008 | 1.35188201 | 0.19206239 | NA | KLHL14    | KLHL14   |
| CCDC110   | 1.8985224  | 0.67066792 | 0.19206239 | NA | CCDC110   | NA       |
| KLHL21    | 1.8221708  | 0.7030475  | 0.19206239 | NA | KLHL21    | NA       |
| LOC151009 | 1.9328236  | 0.70324145 | 0.19206239 | NA | LOC151009 | NA       |
| NGEF      | 1.9272593  | 0.79921309 | 0.19206239 | NA | NGEF      | NA       |
| RLIM      | 1.8984403  | 0.79797798 | 0.19206239 | NA | RLIM      | NA       |
| SLC22A15  | -1.8528495 | 1.3029058  | 0.19206239 | NA | SLC22A15  | NA       |
| TMEM111   | 1.8818937  | 0.74576381 | 0.19206239 | NA | TMEM111   | NA       |
| ZBTB44    | 1.92715    | 0.78897914 | 0.19206239 | NA | ZBTB44    | NA       |
| NOS1      | -1.9311619 | 1.2985339  | 0.19206239 | NA | NOS1      | NOS1     |
| PLOD2     | 1.8199163  | 0.63535707 | 0.19206239 | NA | PLOD2     | PLOD2    |
| RSL24D1   | 1.9607116  | 0.76287592 | 0.19206239 | NA | RSL24D1   | RSL24D1  |
| SNX9      | 1.8759538  | 0.72844561 | 0.19206239 | NA | SNX9      | SNX9     |
| ZADH2     | -1.9388644 | 1.33605933 | 0.19206239 | NA | ZADH2     | ZADH2    |
| ZNF706    | -1.8489992 | 1.22405684 | 0.19206239 | NA | ZNF706    | ZNF706   |
| AMOTL1    | -1.6708045 | 1.2233893  | 0.56921718 | NA | AMOTL1    | AMOTL1   |
| C1orf201  | 1.6867839  | 0.76162761 | 0.56921718 | NA | C1orf201  | C1orf201 |
| CHGB      | 1.6889775  | 0.80786526 | 0.56921718 | NA | CHGB      | CHGB     |
| DIAPH3    | -1.691133  | 1.316908   | 0.56921718 | NA | DIAPH3    | DIAPH3   |
| DUSP6     | -1.6648534 | 1.34244361 | 0.56921718 | NA | DUSP6     | DUSP6    |
| FBXL4     | 1.7030863  | 0.74322208 | 0.56921718 | NA | FBXL4     | FBXL4    |
| FOSL2     | -1.8048882 | 1.39235042 | 0.56921718 | NA | FOSL2     | FOSL2    |
| GRM3      | 1.7963915  | 0.79517321 | 0.56921718 | NA | GRM3      | GRM3     |
| ID4       | -1.714183  | 1.24941014 | 0.56921718 | NA | ID4       | ID4      |
| LRRC4C    | 1.7723172  | 0.78380855 | 0.56921718 | NA | LRRC4C    | LRRC4C   |
| MAOA      | -1.7230175 | 1.26439033 | 0.56921718 | NA | MAOA      | MAOA     |
| MIAT      | 1.6685052  | 0.7468721  | 0.56921718 | NA | MIAT      | MIAT     |
| CIDEA     | 1.6688155  | 0.73169435 | 0.56921718 | NA | CIDEA     | NA       |
| MXRA7     | -1.7854284 | 1.28071002 | 0.56921718 | NA | MXRA7     | NA       |
| NINJ1     | 1.6946936  | 0.79883026 | 0.56921718 | NA | NINJ1     | NA       |
| TMIGD2    | 1.7168483  | 0.7748928  | 0.56921718 | NA | TMIGD2    | NA       |
| NGB       | 1.6973064  | 0.81316304 | 0.56921718 | NA | NGB       | NGB      |
| NR2F2     | 1.6810585  | 0.78707751 | 0.56921718 | NA | NR2F2     | NR2F2    |
| NRXN3     | -1.6779785 | 1.23251032 | 0.56921718 | NA | NRXN3     | NRXN3    |
| PLXNC1    | -1.7689523 | 1.29644548 | 0.56921718 | NA | PLXNC1    | PLXNC1   |
| RAPGEFL1  | 1.7176713  | 0.71074745 | 0.56921718 | NA | RAPGEFL1  | RAPGEFL1 |
| RUNX2     | -1.6858028 | 1.28467826 | 0.56921718 | NA | RUNX2     | RUNX2    |
| SMAD3     | 1.7388772  | 0.78593321 | 0.56921718 | NA | SMAD3     | SMAD3    |
| ZAK       | 1.670217   | 0.71519869 | 0.56921718 | NA | ZAK       | ZAK      |
| ZHX2      | 1.7521996  | 0.76600304 | 0.56921718 | NA | ZHX2      | ZHX2     |
| AUH       | 1.5088174  | 0.79367185 | 0.88419955 | NA | AUH       | AUH      |
| CDH13     | 1.5766612  | 0.71012446 | 0.88419955 | NA | CDH13     | CDH13    |
| CLCN4     | -1.6496394 | 1.35400775 | 0.88419955 | NA | CLCN4     | CLCN4    |

|          |            |            |            |    |          |          |
|----------|------------|------------|------------|----|----------|----------|
| DCC      | -1.5468003 | 1.25641969 | 0.88419955 | NA | DCC      | DCC      |
| DMXL1    | 1.5936059  | 0.79464748 | 0.88419955 | NA | DMXL1    | DMXL1    |
| DNMT3A   | -1.6393412 | 1.26259462 | 0.88419955 | NA | DNMT3A   | DNMT3A   |
| KBTBD8   | 1.5720203  | 0.79932808 | 0.88419955 | NA | KBTBD8   | KBTBD8   |
| KIAA1958 | -1.5262747 | 1.26307324 | 0.88419955 | NA | KIAA1958 | KIAA1958 |
| MARK1    | 1.5520661  | 0.80040881 | 0.88419955 | NA | MARK1    | MARK1    |
| MDH1     | 1.6458122  | 0.7827652  | 0.88419955 | NA | MDH1     | MDH1     |
| MITF     | 1.626352   | 0.7826945  | 0.88419955 | NA | MITF     | MITF     |
| MYO1B    | -1.6535742 | 1.26905342 | 0.88419955 | NA | MYO1B    | MYO1B    |
| CPLX3    | 1.6128539  | 0.80616955 | 0.88419955 | NA | CPLX3    | NA       |
| CRIPAK   | 1.5992703  | 0.7591401  | 0.88419955 | NA | CRIPAK   | NA       |
| PREB     | -1.5009519 | 1.19427223 | 0.88419955 | NA | PREB     | NA       |
| PSRC1    | -1.6109387 | 1.34653818 | 0.88419955 | NA | PSRC1    | NA       |
| SCO2     | -1.6514943 | 1.26470566 | 0.88419955 | NA | SCO2     | NA       |
| SEPX1    | -1.5896316 | 1.26272394 | 0.88419955 | NA | SEPX1    | NA       |
| TP53BP2  | 1.5084482  | 0.80778045 | 0.88419955 | NA | TP53BP2  | NA       |
| PRKCB    | 1.623504   | 0.7653644  | 0.88419955 | NA | PRKCB    | PRKCB    |
| SH3KBP1  | 1.6217678  | 0.81439028 | 0.88419955 | NA | SH3KBP1  | SH3KBP1  |
| SMAD7    | 1.5822772  | 0.77254442 | 0.88419955 | NA | SMAD7    | SMAD7    |
| SPRED2   | -1.5160014 | 1.21935135 | 0.88419955 | NA | SPRED2   | SPRED2   |
| STAG2    | 1.5384991  | 0.80153576 | 0.88419955 | NA | STAG2    | STAG2    |
| SYT13    | 1.5262234  | 0.77492133 | 0.88419955 | NA | SYT13    | SYT13    |
| TDP1     | -1.6031528 | 1.24968789 | 0.88419955 | NA | TDP1     | TDP1     |
| TMEM47   | -1.6560851 | 1.2938101  | 0.88419955 | NA | TMEM47   | TMEM47   |
| TMEM5    | -1.5773597 | 1.27996903 | 0.88419955 | NA | TMEM5    | TMEM5    |
| ZNF395   | -1.598808  | 1.21514445 | 0.88419955 | NA | ZNF395   | ZNF395   |

### **CAR only PFOvsPT q<0.01**

| <b>SYMBOL</b> | <b>PFOvsPT.d</b> | <b>PFOvsPT.FC</b> | <b>PFOvsPT.q</b> | <b>HAR</b> | <b>CAR</b> | <b>MAR</b> |
|---------------|------------------|-------------------|------------------|------------|------------|------------|
| ARHGDIB       | -2.6187164       | 1.37947451        | 0                | NA         | ARHGDIB    | NA         |
| CACNA1A       | -5.7244908       | 2.02037437        | 0                | NA         | CACNA1A    | NA         |
| CNKSR3        | -5.9495054       | 2.9706848         | 0                | NA         | CNKSR3     | NA         |
| CYP27C1       | -4.0171215       | 2.88173718        | 0                | NA         | CYP27C1    | NA         |
| DCBLD1        | 2.2063284        | 0.71430327        | 0                | NA         | DCBLD1     | NA         |
| DNAH10        | -2.8406866       | 1.5059201         | 0                | NA         | DNAH10     | NA         |
| FSIP1         | 3.2066337        | 0.54366788        | 0                | NA         | FSIP1      | NA         |
| MEIS3P1       | -4.0994783       | 3.16136077        | 0                | NA         | MEIS3P1    | NA         |
| PKIG          | -2.4710853       | 1.51923202        | 0                | NA         | PKIG       | NA         |
| PLAGL1        | 2.7294518        | 0.62240269        | 0                | NA         | PLAGL1     | NA         |
| SLC16A1       | 3.2925757        | 0.59571496        | 0                | NA         | SLC16A1    | NA         |
| TNFAIP8       | 2.5452211        | 0.57765687        | 0                | NA         | TNFAIP8    | NA         |
| ASAM          | -2.1306034       | 1.62637404        | 0.11329523       | NA         | ASAM       | NA         |
| C13orf18      | 2.0554786        | 0.66207045        | 0.11329523       | NA         | C13orf18   | NA         |
| PLP2          | 2.1639678        | 0.71837011        | 0.11329523       | NA         | PLP2       | NA         |
| CCDC110       | 1.8985224        | 0.67066792        | 0.19206239       | NA         | CCDC110    | NA         |
| KLHL21        | 1.8221708        | 0.7030475         | 0.19206239       | NA         | KLHL21     | NA         |
| LOC151009     | 1.9328236        | 0.70324145        | 0.19206239       | NA         | LOC151009  | NA         |
| NGEF          | 1.9272593        | 0.79921309        | 0.19206239       | NA         | NGEF       | NA         |
| RLIM          | 1.8984403        | 0.79797798        | 0.19206239       | NA         | RLIM       | NA         |
| SLC22A15      | -1.8528495       | 1.3029058         | 0.19206239       | NA         | SLC22A15   | NA         |
| TMEM111       | 1.8818937        | 0.74576381        | 0.19206239       | NA         | TMEM111    | NA         |
| ZBTB44        | 1.92715          | 0.78897914        | 0.19206239       | NA         | ZBTB44     | NA         |
| CIDEA         | 1.6688155        | 0.73169435        | 0.56921718       | NA         | CIDEA      | NA         |

|         |            |            |            |    |         |    |
|---------|------------|------------|------------|----|---------|----|
| MXRA7   | -1.7854284 | 1.28071002 | 0.56921718 | NA | MXRA7   | NA |
| NINJ1   | 1.6946936  | 0.79883026 | 0.56921718 | NA | NINJ1   | NA |
| TMIGD2  | 1.7168483  | 0.7748928  | 0.56921718 | NA | TMIGD2  | NA |
| CPLX3   | 1.6128539  | 0.80616955 | 0.88419955 | NA | CPLX3   | NA |
| CRIPAK  | 1.5992703  | 0.7591401  | 0.88419955 | NA | CRIPAK  | NA |
| PREB    | -1.5009519 | 1.19427223 | 0.88419955 | NA | PREB    | NA |
| PSRC1   | -1.6109387 | 1.34653818 | 0.88419955 | NA | PSRC1   | NA |
| SCO2    | -1.6514943 | 1.26470566 | 0.88419955 | NA | SCO2    | NA |
| SEPX1   | -1.5896316 | 1.26272394 | 0.88419955 | NA | SEPX1   | NA |
| TP53BP2 | 1.5084482  | 0.80778045 | 0.88419955 | NA | TP53BP2 | NA |

## **MAR PFOvsPT q<0.01**

| <b>SYMBOL</b> | <b>PFOvsPT.d</b> | <b>PFOvsPT.FC</b> | <b>PFOvsPT.q</b> | <b>HAR</b> | <b>CAR</b> | <b>MAR</b> |
|---------------|------------------|-------------------|------------------|------------|------------|------------|
| ADCYAP1       | -3.0970772       | 1.61592882        | 0                | ADCYAP1    | NA         | ADCYAP1    |
| ADRA2A        | -2.2026569       | 1.32088762        | 0                | ADRA2A     | ADRA2A     | ADRA2A     |
| ADRB1         | 3.2483725        | 0.62843359        | 0                | ADRB1      | NA         | ADRB1      |
| AKT3          | 5.2245195        | 0.38230327        | 0                | AKT3       | AKT3       | AKT3       |
| ASTN2         | -3.537837        | 1.8451722         | 0                | ASTN2      | ASTN2      | ASTN2      |
| BCL11A        | 2.8875415        | 0.57742488        | 0                | BCL11A     | BCL11A     | BCL11A     |
| BMP2          | -4.2137159       | 2.61468581        | 0                | BMP2       | BMP2       | BMP2       |
| C4orf32       | 2.3831704        | 0.76084728        | 0                | C4orf32    | C4orf32    | C4orf32    |
| CA10          | -6.12            | 5.71221273        | 0                | CA10       | CA10       | CA10       |
| CBLN4         | -2.6478539       | 1.61876179        | 0                | CBLN4      | NA         | CBLN4      |
| CDH8          | -6.0646864       | 4.185182          | 0                | CDH8       | CDH8       | CDH8       |
| CNTN4         | -4.2956365       | 2.05345693        | 0                | CNTN4      | CNTN4      | CNTN4      |
| CNTN6         | -2.8124791       | 1.62508137        | 0                | CNTN6      | CNTN6      | CNTN6      |
| CTNNA2        | 2.3498011        | 0.72677424        | 0                | CTNNA2     | CTNNA2     | CTNNA2     |
| CYTIP         | 2.420378         | 0.61081395        | 0                | CYTIP      | NA         | CYTIP      |
| DPP10         | 2.3546219        | 0.6215833         | 0                | DPP10      | DPP10      | DPP10      |
| EGLN3         | -2.9967726       | 1.72101012        | 0                | EGLN3      | EGLN3      | EGLN3      |
| FAM181B       | -2.4483969       | 1.44723701        | 0                | FAM181B    | FAM181B    | FAM181B    |
| FAM19A1       | 4.3485528        | 0.48800542        | 0                | FAM19A1    | NA         | FAM19A1    |
| FAM5C         | -6.2733541       | 4.38293974        | 0                | FAM5C      | FAM5C      | FAM5C      |
| FLJ13197      | 3.651636         | 0.51804829        | 0                | FLJ13197   | NA         | FLJ13197   |
| FST           | 2.4569874        | 0.57303           | 0                | FST        | FST        | FST        |
| GBE1          | -3.791506        | 1.82357854        | 0                | GBE1       | GBE1       | GBE1       |
| GFRA2         | -3.4819788       | 2.03486324        | 0                | GFRA2      | GFRA2      | GFRA2      |
| GPR64         | 4.0661047        | 0.33444216        | 0                | GPR64      | NA         | GPR64      |
| GSTA4         | 3.1060179        | 0.61447252        | 0                | GSTA4      | NA         | GSTA4      |
| HS3ST5        | -2.6831055       | 1.77210432        | 0                | HS3ST5     | NA         | HS3ST5     |
| INHBA         | 3.8503447        | 0.53577238        | 0                | INHBA      | NA         | INHBA      |
| ITGBL1        | -2.8160076       | 1.50576473        | 0                | ITGBL1     | NA         | ITGBL1     |
| KCNQ5         | -3.4225801       | 1.81548163        | 0                | KCNQ5      | NA         | KCNQ5      |
| KCNV1         | -2.3638489       | 1.62181689        | 0                | KCNV1      | KCNV1      | KCNV1      |
| KIAA1797      | 2.2970172        | 0.70104402        | 0                | KIAA1797   | NA         | KIAA1797   |
| L3MBTL4       | -7.3135318       | 2.8540538         | 0                | L3MBTL4    | NA         | L3MBTL4    |
| LHX2          | 5.766844         | 0.4639514         | 0                | LHX2       | LHX2       | LHX2       |
| LPHN2         | 4.2270257        | 0.47033437        | 0                | LPHN2      | LPHN2      | LPHN2      |
| LRRC8B        | -2.8892578       | 1.4786014         | 0                | LRRC8B     | LRRC8B     | LRRC8B     |
| LRRN3         | 3.7923133        | 0.62994277        | 0                | LRRN3      | NA         | LRRN3      |
| LYPD1         | -2.40434         | 1.63547339        | 0                | LYPD1      | NA         | LYPD1      |
| MEIS2         | -8.0564215       | 3.20343535        | 0                | MEIS2      | MEIS2      | MEIS2      |
| MID1IP1       | -3.3184109       | 1.50260718        | 0                | MID1IP1    | MID1IP1    | MID1IP1    |
| MN1           | -2.3740917       | 1.37684425        | 0                | MN1        | NA         | MN1        |

|           |            |            |   |    |          |           |
|-----------|------------|------------|---|----|----------|-----------|
| AADAT     | -2.5028615 | 1.32458137 | 0 | NA | NA       | AADAT     |
| ABCA1     | -3.0361926 | 1.58268171 | 0 | NA | NA       | ABCA1     |
| ACCN1     | -2.6307648 | 1.67979598 | 0 | NA | ACCN1    | ACCN1     |
| ACTN2     | 5.7230026  | 0.4636697  | 0 | NA | NA       | ACTN2     |
| ACVR1C    | 4.1708629  | 0.43979572 | 0 | NA | NA       | ACVR1C    |
| ADAMTS16  | -2.3622011 | 1.76005451 | 0 | NA | ADAMTS16 | ADAMTS16  |
| ADAMTS3   | -2.4132743 | 1.48483016 | 0 | NA | NA       | ADAMTS3   |
| ADCY8     | -7.3811571 | 3.68678064 | 0 | NA | NA       | ADCY8     |
| ADI1      | 2.2650305  | 0.75310026 | 0 | NA | NA       | ADI1      |
| AK3L1     | -2.7061578 | 1.72460433 | 0 | NA | NA       | AK3L1     |
| AK5       | 2.4672315  | 0.67898931 | 0 | NA | AK5      | AK5       |
| ANKH      | 2.6719111  | 0.68214739 | 0 | NA | NA       | ANKH      |
| ANKRD32   | -5.2441495 | 2.29550366 | 0 | NA | ANKRD32  | ANKRD32   |
| ANKRD57   | 3.0675827  | 0.64815372 | 0 | NA | NA       | ANKRD57   |
| ANKS1B    | 5.4887345  | 0.46381882 | 0 | NA | NA       | ANKS1B    |
| ANO3      | 2.3646069  | 0.48056189 | 0 | NA | NA       | ANO3      |
| ANO4      | -3.3417516 | 1.52520784 | 0 | NA | NA       | ANO4      |
| ANTXR2    | 3.9176954  | 0.58369719 | 0 | NA | NA       | ANTXR2    |
| APOO      | -2.2526913 | 1.32642345 | 0 | NA | APOO     | APOO      |
| ARHGAP6   | -3.195736  | 1.87980994 | 0 | NA | NA       | ARHGAP6   |
| ARHGEF6   | 2.8277758  | 0.64287333 | 0 | NA | NA       | ARHGEF6   |
| ARL4A     | 2.511116   | 0.63345231 | 0 | NA | NA       | ARL4A     |
| ARNTL     | 2.5357596  | 0.65285149 | 0 | NA | ARNTL    | ARNTL     |
| ASAH1     | 2.5440324  | 0.73396012 | 0 | NA | NA       | ASAH1     |
| ASCL1     | 4.3720168  | 0.50310044 | 0 | NA | NA       | ASCL1     |
| ATP8A2    | -2.771165  | 1.51469201 | 0 | NA | NA       | ATP8A2    |
| B3GALT2   | 3.1860665  | 0.64355277 | 0 | NA | NA       | B3GALT2   |
| B3GAT2    | -2.2564059 | 1.50607282 | 0 | NA | NA       | B3GAT2    |
| B3GNT2    | -2.2363781 | 1.33150078 | 0 | NA | NA       | B3GNT2    |
| BAMBI     | -2.5486832 | 1.74619574 | 0 | NA | NA       | BAMBI     |
| BARD1     | 3.8839376  | 0.39442453 | 0 | NA | NA       | BARD1     |
| BATF3     | 2.2609024  | 0.66619292 | 0 | NA | NA       | BATF3     |
| BDNF      | -6.0284835 | 4.73059426 | 0 | NA | NA       | BDNF      |
| BEND6     | 2.719765   | 0.6260379  | 0 | NA | NA       | BEND6     |
| BHLHE40   | 2.4061711  | 0.67549028 | 0 | NA | NA       | BHLHE40   |
| C14orf132 | 4.9873905  | 0.49423025 | 0 | NA | NA       | C14orf132 |
| C16orf61  | -4.4408933 | 1.96458039 | 0 | NA | NA       | C16orf61  |
| C18orf1   | 2.6272125  | 0.72658286 | 0 | NA | NA       | C18orf1   |
| C1orf198  | -2.5560951 | 1.44208311 | 0 | NA | NA       | C1orf198  |
| C3orf59   | -3.6667364 | 1.71843955 | 0 | NA | NA       | C3orf59   |
| C6orf141  | -2.511954  | 1.54599037 | 0 | NA | NA       | C6orf141  |
| CACNA2D3  | -5.0183639 | 2.37311616 | 0 | NA | CACNA2D3 | CACNA2D3  |
| CALB1     | -10.470768 | 11.6676061 | 0 | NA | NA       | CALB1     |
| CAP2      | 2.3484789  | 0.74445997 | 0 | NA | NA       | CAP2      |
| CBLN1     | -7.7041147 | 4.80719481 | 0 | NA | CBLN1    | CBLN1     |
| CBLN2     | -14.554868 | 11.2565275 | 0 | NA | NA       | CBLN2     |
| CCDC109A  | -2.989666  | 1.63539425 | 0 | NA | CCDC109A | CCDC109A  |
| CCDC109B  | 3.0258479  | 0.54338818 | 0 | NA | NA       | CCDC109B  |
| CDCA7     | 2.3297026  | 0.73081932 | 0 | NA | NA       | CDCA7     |
| CDCA7L    | -3.204917  | 1.82154463 | 0 | NA | NA       | CDCA7L    |
| CDH12     | -3.0931634 | 1.70193601 | 0 | NA | CDH12    | CDH12     |
| CDH3      | 2.8363774  | 0.6615742  | 0 | NA | NA       | CDH3      |
| CDH9      | 3.3472538  | 0.50238639 | 0 | NA | CDH9     | CDH9      |
| CENPF     | -2.9824191 | 1.57276807 | 0 | NA | NA       | CENPF     |
| CEP120    | -2.8706623 | 1.55083986 | 0 | NA | CEP120   | CEP120    |
| CGRRF1    | -4.1255188 | 2.23860247 | 0 | NA | CGRRF1   | CGRRF1    |
| CHRD1     | -4.5280955 | 2.8838507  | 0 | NA | NA       | CHRD1     |
| CHST8     | 2.9652964  | 0.48824292 | 0 | NA | NA       | CHST8     |

|          |            |            |   |    |          |          |
|----------|------------|------------|---|----|----------|----------|
| CLDN1    | -6.6031156 | 2.44678317 | 0 | NA | NA       | CLDN1    |
| CNIH3    | -3.9901337 | 1.71872752 | 0 | NA | NA       | CNIH3    |
| CNTN3    | -5.1226552 | 2.1416389  | 0 | NA | CNTN3    | CNTN3    |
| CNTNAP2  | -5.1222137 | 3.34073761 | 0 | NA | NA       | CNTNAP2  |
| COL12A1  | -2.5600556 | 1.45817607 | 0 | NA | NA       | COL12A1  |
| COMMD2   | 2.6738365  | 0.72015488 | 0 | NA | NA       | COMMD2   |
| COX7A1   | 3.6220653  | 0.49840726 | 0 | NA | COX7A1   | COX7A1   |
| CPNE8    | -7.9019211 | 5.45090012 | 0 | NA | CPNE8    | CPNE8    |
| CRISPLD1 | -2.8583041 | 1.65098592 | 0 | NA | NA       | CRISPLD1 |
| CSRP2    | -5.7836768 | 2.30538505 | 0 | NA | NA       | CSRP2    |
| CTNNBL1  | -5.1701204 | 2.60508807 | 0 | NA | CTNNBL1  | CTNNBL1  |
| CTXN3    | -3.1547723 | 2.02249669 | 0 | NA | CTXN3    | CTXN3    |
| CUX1     | 8.0750155  | 0.33967862 | 0 | NA | NA       | CUX1     |
| CXCR4    | 2.4724394  | 0.73913062 | 0 | NA | NA       | CXCR4    |
| CXorf1   | 3.5295083  | 0.5214482  | 0 | NA | CXorf1   | CXorf1   |
| CXXC4    | -3.9002226 | 1.68344979 | 0 | NA | NA       | CXXC4    |
| CXXC5    | -5.7185821 | 2.53493779 | 0 | NA | NA       | CXXC5    |
| CYP26A1  | -2.9104637 | 2.07047558 | 0 | NA | NA       | CYP26A1  |
| DACH2    | 5.3983733  | 0.39389626 | 0 | NA | DACH2    | DACH2    |
| DACT1    | 3.7612088  | 0.6514341  | 0 | NA | DACT1    | DACT1    |
| DERA     | -3.2478245 | 1.90395366 | 0 | NA | NA       | DERA     |
| DGKI     | 2.8821568  | 0.44509385 | 0 | NA | DGKI     | DGKI     |
| DLG1     | 3.1684757  | 0.60089689 | 0 | NA | DLG1     | DLG1     |
| DNER     | 2.2646872  | 0.67573729 | 0 | NA | NA       | DNER     |
| DOK5     | 3.4689382  | 0.68277451 | 0 | NA | DOK5     | DOK5     |
| DUSP10   | -4.7462373 | 1.89223447 | 0 | NA | NA       | DUSP10   |
| DUSP4    | -4.5331275 | 2.38044825 | 0 | NA | NA       | DUSP4    |
| DYRK2    | 2.3302515  | 0.68671835 | 0 | NA | DYRK2    | DYRK2    |
| EDIL3    | 2.4718718  | 0.71487974 | 0 | NA | NA       | EDIL3    |
| EFR3A    | -2.5473489 | 1.48864717 | 0 | NA | NA       | EFR3A    |
| EMX2     | -3.67376   | 2.37966598 | 0 | NA | NA       | EMX2     |
| EPCAM    | 3.3607583  | 0.567492   | 0 | NA | NA       | EPCAM    |
| EPHA4    | -2.3288721 | 1.52144273 | 0 | NA | EPHA4    | EPHA4    |
| EPHA7    | 2.3254158  | 0.64339145 | 0 | NA | NA       | EPHA7    |
| EPS15    | -2.380353  | 1.48687855 | 0 | NA | NA       | EPS15    |
| F3       | -2.1747337 | 1.73215267 | 0 | NA | NA       | F3       |
| FAM19A5  | -2.2537914 | 1.36434919 | 0 | NA | FAM19A5  | FAM19A5  |
| FAM59A   | -2.4934649 | 1.78462466 | 0 | NA | NA       | FAM59A   |
| FAM5B    | -2.7524322 | 1.60087371 | 0 | NA | FAM5B    | FAM5B    |
| FERMT2   | 4.2632045  | 0.48073451 | 0 | NA | NA       | FERMT2   |
| FGF12    | -3.1985688 | 1.60028385 | 0 | NA | FGF12    | FGF12    |
| FGF14    | -4.161336  | 1.89013512 | 0 | NA | FGF14    | FGF14    |
| FGFBP3   | 5.9094274  | 0.39665838 | 0 | NA | NA       | FGFBP3   |
| FHDC1    | -6.7100988 | 2.52361319 | 0 | NA | NA       | FHDC1    |
| FJX1     | 5.5721969  | 0.39617966 | 0 | NA | NA       | FJX1     |
| FLJ11235 | 2.3242112  | 0.67035538 | 0 | NA | NA       | FLJ11235 |
| FLJ43390 | -9.7499031 | 5.56194442 | 0 | NA | FLJ43390 | FLJ43390 |
| FLRT3    | -6.0329061 | 2.31581298 | 0 | NA | FLRT3    | FLRT3    |
| FOXP1    | 2.5735375  | 0.71489822 | 0 | NA | NA       | FOXP1    |
| FRMPD4   | 2.6700364  | 0.72369361 | 0 | NA | FRMPD4   | FRMPD4   |
| FRZB     | 2.8764855  | 0.66639767 | 0 | NA | NA       | FRZB     |
| FSTL5    | -9.134059  | 5.14415268 | 0 | NA | NA       | FSTL5    |
| FZD4     | -2.5504763 | 1.47882771 | 0 | NA | NA       | FZD4     |
| GAB1     | 2.4348477  | 0.72772467 | 0 | NA | NA       | GAB1     |
| GABRA1   | -2.4861275 | 1.5458172  | 0 | NA | GABRA1   | GABRA1   |
| GABRA5   | 4.1635031  | 0.57212962 | 0 | NA | GABRA5   | GABRA5   |
| GABRG1   | 3.8878003  | 0.50753413 | 0 | NA | NA       | GABRG1   |
| GABRG2   | -2.500529  | 1.35616898 | 0 | NA | GABRG2   | GABRG2   |

|          |            |            |   |    |          |          |
|----------|------------|------------|---|----|----------|----------|
| GALNT2   | -4.2925877 | 1.95474348 | 0 | NA | NA       | GALNT2   |
| GAS1     | -2.8207017 | 1.43925682 | 0 | NA | GAS1     | GAS1     |
| GCG      | -4.5083529 | 2.3913353  | 0 | NA | NA       | GCG      |
| GHR      | 2.8771158  | 0.43728712 | 0 | NA | NA       | GHR      |
| GLT25D2  | -3.7023891 | 1.66361917 | 0 | NA | NA       | GLT25D2  |
| GOLSYN   | 3.3184939  | 0.65282491 | 0 | NA | GOLSYN   | GOLSYN   |
| GPHN     | 2.5740778  | 0.72677534 | 0 | NA | NA       | GPHN     |
| GPR22    | 3.3248308  | 0.47835698 | 0 | NA | NA       | GPR22    |
| GPR37    | -2.8484793 | 1.64943831 | 0 | NA | NA       | GPR37    |
| GPR88    | -3.4255545 | 2.18844425 | 0 | NA | NA       | GPR88    |
| GPSM2    | -3.4162766 | 2.69405811 | 0 | NA | NA       | GPSM2    |
| GRB14    | 2.5728727  | 0.49303609 | 0 | NA | GRB14    | GRB14    |
| GREM1    | -2.8864642 | 2.73409001 | 0 | NA | NA       | GREM1    |
| GREM2    | -4.9255321 | 4.01956006 | 0 | NA | NA       | GREM2    |
| H2AFY2   | -2.909317  | 1.40106706 | 0 | NA | H2AFY2   | H2AFY2   |
| HCRTR2   | -2.6419059 | 1.7646649  | 0 | NA | NA       | HCRTR2   |
| HEY1     | -3.7913367 | 1.48994671 | 0 | NA | NA       | HEY1     |
| HIP1R    | -2.1829824 | 1.28957466 | 0 | NA | NA       | HIP1R    |
| HLF      | 4.0234794  | 0.4754812  | 0 | NA | HLF      | HLF      |
| HS3ST1   | -2.2006599 | 1.42280822 | 0 | NA | NA       | HS3ST1   |
| HS6ST3   | -3.6617101 | 2.5215554  | 0 | NA | NA       | HS6ST3   |
| HSPA12A  | -4.2211371 | 2.06573928 | 0 | NA | NA       | HSPA12A  |
| HTR1A    | 3.8667755  | 0.55382899 | 0 | NA | NA       | HTR1A    |
| HUNK     | -3.5936681 | 1.62480292 | 0 | NA | NA       | HUNK     |
| ID2      | 3.8786506  | 0.44944894 | 0 | NA | ID2      | ID2      |
| IGFBP4   | 2.3828134  | 0.68418134 | 0 | NA | IGFBP4   | IGFBP4   |
| IGFBP5   | -2.834741  | 1.61843461 | 0 | NA | IGFBP5   | IGFBP5   |
| IGSF11   | -7.5561874 | 3.09731621 | 0 | NA | IGSF11   | IGSF11   |
| IL7      | -4.0113273 | 3.62954247 | 0 | NA | NA       | IL7      |
| INTS12   | -2.4877879 | 1.36118535 | 0 | NA | NA       | INTS12   |
| IRS2     | -3.4481015 | 1.49754195 | 0 | NA | NA       | IRS2     |
| ITGA2    | 2.7273643  | 0.64873872 | 0 | NA | NA       | ITGA2    |
| ITGA9    | -2.8155154 | 1.48817905 | 0 | NA | NA       | ITGA9    |
| ITGAV    | 2.574707   | 0.67811483 | 0 | NA | NA       | ITGAV    |
| ITPR1    | 3.6500924  | 0.6397888  | 0 | NA | NA       | ITPR1    |
| JMJD1C   | 2.5771635  | 0.67697228 | 0 | NA | NA       | JMJD1C   |
| JPH1     | -3.2960068 | 1.56100122 | 0 | NA | NA       | JPH1     |
| KCNA5    | -5.2899544 | 2.51664648 | 0 | NA | NA       | KCNA5    |
| KCNC2    | -2.9617191 | 1.43705499 | 0 | NA | NA       | KCNC2    |
| KCNJ6    | -5.6306064 | 2.58105401 | 0 | NA | NA       | KCNJ6    |
| KCNK9    | -3.5810556 | 1.81798244 | 0 | NA | NA       | KCNK9    |
| KCNT2    | 2.3088159  | 0.53576416 | 0 | NA | NA       | KCNT2    |
| KIAA0182 | 2.8095351  | 0.6575132  | 0 | NA | KIAA0182 | KIAA0182 |
| KIAA0319 | 3.0140926  | 0.65502347 | 0 | NA | NA       | KIAA0319 |
| KIAA0895 | 4.4775793  | 0.41370822 | 0 | NA | NA       | KIAA0895 |
| KIAA1239 | 3.8815334  | 0.58276574 | 0 | NA | NA       | KIAA1239 |
| KIAA1377 | -5.0111275 | 2.24041945 | 0 | NA | NA       | KIAA1377 |
| KIAA1804 | 3.1060298  | 0.62349667 | 0 | NA | NA       | KIAA1804 |
| KIT      | -3.1769796 | 1.63754001 | 0 | NA | NA       | KIT      |
| KITLG    | 2.7996099  | 0.49657375 | 0 | NA | NA       | KITLG    |
| KL       | 2.5219389  | 0.67779547 | 0 | NA | NA       | KL       |
| KLF6     | -2.7404503 | 1.42932138 | 0 | NA | KLF6     | KLF6     |
| KLHL32   | 5.6726516  | 0.24577443 | 0 | NA | NA       | KLHL32   |
| KLHL8    | 3.0656515  | 0.69557702 | 0 | NA | NA       | KLHL8    |
| KRT31    | -3.8344871 | 2.18590383 | 0 | NA | NA       | KRT31    |
| LDB2     | -2.8931194 | 1.4399603  | 0 | NA | NA       | LDB2     |
| LDLRAD3  | 4.0334391  | 0.51008571 | 0 | NA | NA       | LDLRAD3  |
| LGALS8   | 2.2259948  | 0.72480252 | 0 | NA | LGALS8   | LGALS8   |

|           |            |            |   |    |           |           |
|-----------|------------|------------|---|----|-----------|-----------|
| LHFP      | 3.3336246  | 0.60532507 | 0 | NA | LHFP      | LHFP      |
| LHFPL2    | -4.0089999 | 1.78865557 | 0 | NA | NA        | LHFPL2    |
| LMO3      | -2.4423344 | 1.621965   | 0 | NA | LMO3      | LMO3      |
| LMO4      | -5.4333042 | 2.09762329 | 0 | NA | LMO4      | LMO4      |
| LN2       | -2.7594468 | 1.56511014 | 0 | NA | NA        | LN2       |
| LOC150568 | -4.5808282 | 2.16132196 | 0 | NA | LOC150568 | LOC150568 |
| LOC283392 | 3.2109194  | 0.58737246 | 0 | NA | LOC283392 | LOC283392 |
| LOC286002 | 6.6399202  | 0.37730405 | 0 | NA | NA        | LOC286002 |
| LOC645323 | 2.2641538  | 0.74917028 | 0 | NA | LOC645323 | LOC645323 |
| LOC653786 | 2.4826133  | 0.66960833 | 0 | NA | LOC653786 | LOC653786 |
| LOX       | 4.6566289  | 0.52134261 | 0 | NA | NA        | LOX       |
| LPL       | 2.7815804  | 0.71377351 | 0 | NA | NA        | LPL       |
| LRRC3B    | -4.8019253 | 1.97409064 | 0 | NA | NA        | LRRC3B    |
| LRRTM2    | -2.4679681 | 1.4276446  | 0 | NA | NA        | LRRTM2    |
| LRRTM4    | 5.9239675  | 0.23561301 | 0 | NA | LRRTM4    | LRRTM4    |
| LUZP2     | 2.5089308  | 0.46101732 | 0 | NA | NA        | LUZP2     |
| MAL2      | -2.6502091 | 1.76772617 | 0 | NA | NA        | MAL2      |
| MAMLD1    | -2.732106  | 1.53315954 | 0 | NA | MAMLD1    | MAMLD1    |
| MAP3K5    | -6.2555867 | 3.27948624 | 0 | NA | NA        | MAP3K5    |
| MARCH3    | -5.561013  | 1.98423491 | 0 | NA | MARCH3    | MARCH3    |
| MAST4     | -4.5965819 | 1.89897414 | 0 | NA | MAST4     | MAST4     |
| MC4R      | -2.7448307 | 2.07739068 | 0 | NA | MC4R      | MC4R      |
| MCHR2     | -3.564827  | 1.90786707 | 0 | NA | NA        | MCHR2     |
| MCTP1     | 3.6104371  | 0.58045841 | 0 | NA | NA        | MCTP1     |
| MDGA1     | -2.3368477 | 1.47049165 | 0 | NA | MDGA1     | MDGA1     |
| ME3       | -2.3898726 | 1.31149488 | 0 | NA | NA        | ME3       |
| MEGF10    | -7.2306862 | 3.23291631 | 0 | NA | NA        | MEGF10    |
| MEGF11    | -2.9538663 | 1.677664   | 0 | NA | NA        | MEGF11    |
| MET       | 3.6942663  | 0.56200753 | 0 | NA | NA        | MET       |
| MID1      | 3.3365625  | 0.56004233 | 0 | NA | MID1      | MID1      |
| MIPEP     | -6.0186078 | 2.26883941 | 0 | NA | NA        | MIPEP     |
| MOCS2     | 2.6924114  | 0.68164569 | 0 | NA | NA        | MOCS2     |
| MOSC1     | -2.4501897 | 1.4052336  | 0 | NA | MOSC1     | MOSC1     |
| MPP6      | 2.8271169  | 0.45577482 | 0 | NA | NA        | MPP6      |
| MRAP2     | 2.3949268  | 0.51337438 | 0 | NA | NA        | MRAP2     |
| MTFR1     | 2.241794   | 0.74725754 | 0 | NA | NA        | MTFR1     |
| MYO16     | -3.0542861 | 1.60213646 | 0 | NA | NA        | MYO16     |
| MYO1E     | 2.4481187  | 0.67850105 | 0 | NA | NA        | MYO1E     |
| NCOA2     | 2.3244361  | 0.65543156 | 0 | NA | NA        | NCOA2     |
| NDP       | -4.9907327 | 3.07052035 | 0 | NA | NDP       | NDP       |
| NEBL      | -3.959623  | 1.81477552 | 0 | NA | NA        | NEBL      |
| NEDD9     | -2.4947402 | 1.5534365  | 0 | NA | NA        | NEDD9     |
| NEFL      | 6.1790036  | 0.31463525 | 0 | NA | NA        | NEFL      |
| NEUROD1   | -7.5610329 | 4.91363672 | 0 | NA | NA        | NEUROD1   |
| NFE2L3    | 3.2905816  | 0.45771202 | 0 | NA | NA        | NFE2L3    |
| NME5      | -2.2837135 | 1.57292326 | 0 | NA | NA        | NME5      |
| NOG       | -3.1842631 | 2.05302024 | 0 | NA | NOG       | NOG       |
| NPAS2     | 2.4130014  | 0.7114197  | 0 | NA | NA        | NPAS2     |
| NPY       | 10.487701  | 0.15260943 | 0 | NA | NA        | NPY       |
| NPY1R     | -2.8091789 | 1.55164331 | 0 | NA | NA        | NPY1R     |
| NR2F1     | 4.5333847  | 0.4904898  | 0 | NA | NA        | NR2F1     |
| NR3C1     | 3.9886444  | 0.55590161 | 0 | NA | NR3C1     | NR3C1     |
| NR3C2     | 6.2948111  | 0.35436521 | 0 | NA | NR3C2     | NR3C2     |
| NR4A2     | 5.3728796  | 0.31034033 | 0 | NA | NR4A2     | NR4A2     |
| NRIP1     | -3.2856362 | 1.71512376 | 0 | NA | NA        | NRIP1     |
| NRN1      | 2.645197   | 0.61308738 | 0 | NA | NA        | NRN1      |
| NTN4      | -4.3353016 | 2.12969222 | 0 | NA | NA        | NTN4      |
| NTNG1     | 2.5601591  | 0.6424647  | 0 | NA | NA        | NTNG1     |



|          |            |            |   |    |          |          |
|----------|------------|------------|---|----|----------|----------|
| NTNG2    | 5.0387291  | 0.27228346 | 0 | NA | NTNG2    | NTNG2    |
| NUP93    | -3.4552735 | 1.54554115 | 0 | NA | NA       | NUP93    |
| NXPH3    | 3.2378358  | 0.63766383 | 0 | NA | NXPH3    | NXPH3    |
| ODZ4     | 2.4831271  | 0.71491135 | 0 | NA | ODZ4     | ODZ4     |
| OLFM3    | -2.3427178 | 1.60992788 | 0 | NA | OLFM3    | OLFM3    |
| OSBPL6   | 2.5945569  | 0.64613791 | 0 | NA | NA       | OSBPL6   |
| OTOR     | 3.3941304  | 0.32209121 | 0 | NA | NA       | OTOR     |
| P2RY12   | 2.5446371  | 0.62162186 | 0 | NA | NA       | P2RY12   |
| PACSIN2  | -2.7839704 | 1.44877693 | 0 | NA | NA       | PACSIN2  |
| PAICS    | 3.8589303  | 0.6145106  | 0 | NA | NA       | PAICS    |
| PAK7     | 4.4807926  | 0.58162497 | 0 | NA | NA       | PAK7     |
| PALMD    | -3.1556924 | 1.82573813 | 0 | NA | NA       | PALMD    |
| PAPPA2   | 3.3547903  | 0.67821402 | 0 | NA | NA       | PAPPA2   |
| PBX3     | 2.6304097  | 0.71030199 | 0 | NA | PBX3     | PBX3     |
| PCBD1    | -2.4006729 | 1.43434157 | 0 | NA | NA       | PCBD1    |
| PCDH17   | -5.0671224 | 2.34152922 | 0 | NA | PCDH17   | PCDH17   |
| PCDH18   | -2.4106968 | 1.50798322 | 0 | NA | PCDH18   | PCDH18   |
| PCOLCE2  | 2.5204469  | 0.58040551 | 0 | NA | NA       | PCOLCE2  |
| PCSK2    | 11.205976  | 0.12589846 | 0 | NA | NA       | PCSK2    |
| PCSK9    | 2.8585448  | 0.66795293 | 0 | NA | PCSK9    | PCSK9    |
| PDE4DIP  | 2.650362   | 0.69291976 | 0 | NA | PDE4DIP  | PDE4DIP  |
| PDE8B    | -2.9336571 | 1.67372112 | 0 | NA | NA       | PDE8B    |
| PDZRN3   | 2.3995817  | 0.66270499 | 0 | NA | NA       | PDZRN3   |
| PDZRN4   | -5.4476486 | 2.63707924 | 0 | NA | PDZRN4   | PDZRN4   |
| PENK     | -6.7368517 | 6.43723769 | 0 | NA | NA       | PENK     |
| PGM1     | -2.8866915 | 1.47795452 | 0 | NA | NA       | PGM1     |
| PHLDA1   | -4.0501691 | 1.65922624 | 0 | NA | PHLDA1   | PHLDA1   |
| PIK3AP1  | 2.7624911  | 0.64434479 | 0 | NA | PIK3AP1  | PIK3AP1  |
| PKP4     | -2.4639251 | 1.3398196  | 0 | NA | NA       | PKP4     |
| PLCXD3   | 4.2669402  | 0.47628416 | 0 | NA | NA       | PLCXD3   |
| PLEKHG1  | -3.4388593 | 2.35048104 | 0 | NA | NA       | PLEKHG1  |
| POPDC3   | -4.034346  | 2.24011236 | 0 | NA | NA       | POPDC3   |
| POU6F2   | -2.6805439 | 1.63663371 | 0 | NA | NA       | POU6F2   |
| PPARGC1A | 2.5259817  | 0.69605157 | 0 | NA | PPARGC1A | PPARGC1A |
| PPEF1    | 8.0271043  | 0.3765052  | 0 | NA | NA       | PPEF1    |
| PROK2    | 3.9923299  | 0.40336252 | 0 | NA | NA       | PROK2    |
| PRSS23   | -8.5327816 | 3.48366176 | 0 | NA | NA       | PRSS23   |
| PRUNE2   | -2.1695295 | 1.38494176 | 0 | NA | NA       | PRUNE2   |
| PSD2     | -2.1802477 | 1.30380301 | 0 | NA | PSD2     | PSD2     |
| PTDSS1   | 3.5101653  | 0.65010501 | 0 | NA | NA       | PTDSS1   |
| PTER     | -3.937988  | 2.21395294 | 0 | NA | PTER     | PTER     |
| PTGFR    | -4.2996081 | 3.03066476 | 0 | NA | NA       | PTGFR    |
| PTPN13   | 3.4056784  | 0.52764387 | 0 | NA | NA       | PTPN13   |
| PTPN2    | 2.2949353  | 0.72235209 | 0 | NA | NA       | PTPN2    |
| PTPRK    | 4.7632103  | 0.3977537  | 0 | NA | PTPRK    | PTPRK    |
| PTPRT    | -2.748046  | 1.71787085 | 0 | NA | NA       | PTPRT    |
| PTX3     | -5.0063375 | 2.69234918 | 0 | NA | NA       | PTX3     |
| QDPR     | -2.1979566 | 1.33072736 | 0 | NA | QDPR     | QDPR     |
| RAB7L1   | 3.8609759  | 0.56498331 | 0 | NA | RAB7L1   | RAB7L1   |
| RASGRP1  | 8.1145198  | 0.18252844 | 0 | NA | NA       | RASGRP1  |
| RASL11B  | 4.6466211  | 0.54763951 | 0 | NA | NA       | RASL11B  |
| RBP1     | -2.2620478 | 1.66082427 | 0 | NA | NA       | RBP1     |
| RCAN1    | -3.188018  | 1.56161412 | 0 | NA | NA       | RCAN1    |
| RCAN2    | -6.3698221 | 4.29708113 | 0 | NA | NA       | RCAN2    |
| RFK      | -3.0766184 | 1.42806894 | 0 | NA | NA       | RFK      |
| RFTN1    | -2.4595346 | 1.37948102 | 0 | NA | NA       | RFTN1    |
| RGS20    | 2.36348    | 0.71130303 | 0 | NA | RGS20    | RGS20    |
| RGS8     | -2.4556735 | 1.75033938 | 0 | NA | NA       | RGS8     |

|           |            |            |   |    |         |           |
|-----------|------------|------------|---|----|---------|-----------|
| RGS9      | -2.3931161 | 1.54817406 | 0 | NA | NA      | RGS9      |
| RNF182    | 4.7106408  | 0.47962861 | 0 | NA | RNF182  | RNF182    |
| ROBO2     | 5.3895655  | 0.46474463 | 0 | NA | ROBO2   | ROBO2     |
| RPL23AP32 | 2.2281744  | 0.68807363 | 0 | NA | NA      | RPL23AP32 |
| RPRM      | -3.0311581 | 2.03229418 | 0 | NA | RPRM    | RPRM      |
| RPRML     | 3.4553787  | 0.39643637 | 0 | NA | NA      | RPRML     |
| RRAS2     | -2.2138059 | 1.43616073 | 0 | NA | NA      | RRAS2     |
| RXFP1     | -9.3099821 | 9.18590416 | 0 | NA | NA      | RXFP1     |
| RXRG      | -5.5586275 | 2.9990711  | 0 | NA | NA      | RXRG      |
| RYR3      | 5.4519481  | 0.38078123 | 0 | NA | NA      | RYR3      |
| SAMD13    | -3.0569876 | 1.73761783 | 0 | NA | NA      | SAMD13    |
| SAV1      | 4.2713176  | 0.49855907 | 0 | NA | NA      | SAV1      |
| SDC2      | 2.240968   | 0.57465879 | 0 | NA | NA      | SDC2      |
| SEMA3E    | -2.3056371 | 1.63520145 | 0 | NA | NA      | SEMA3E    |
| SERPINI1  | 3.7436343  | 0.60735495 | 0 | NA | NA      | SERPINI1  |
| SEZ6L     | 2.383783   | 0.70083586 | 0 | NA | NA      | SEZ6L     |
| SFRP1     | -3.1715505 | 1.60973547 | 0 | NA | SFRP1   | SFRP1     |
| SFRP2     | -2.9745118 | 1.69062342 | 0 | NA | SFRP2   | SFRP2     |
| SGCG      | -3.5579458 | 2.88288651 | 0 | NA | NA      | SGCG      |
| SGEF      | 3.0105396  | 0.51600388 | 0 | NA | NA      | SGEF      |
| SGK1      | 4.5344644  | 0.54497708 | 0 | NA | NA      | SGK1      |
| SH3D19    | -2.1801666 | 1.33741731 | 0 | NA | NA      | SH3D19    |
| SHISA2    | 5.6562868  | 0.33524399 | 0 | NA | NA      | SHISA2    |
| SLC12A2   | -2.2112538 | 1.5342079  | 0 | NA | NA      | SLC12A2   |
| SLC17A7   | 3.8280472  | 0.65556488 | 0 | NA | NA      | SLC17A7   |
| SLC35F2   | -2.9960979 | 1.96965228 | 0 | NA | NA      | SLC35F2   |
| SLC6A15   | 2.7910928  | 0.67529137 | 0 | NA | SLC6A15 | SLC6A15   |
| SLCO3A1   | -2.3528977 | 1.73020418 | 0 | NA | SLCO3A1 | SLCO3A1   |
| SLIT2     | -3.0879381 | 1.56586266 | 0 | NA | SLIT2   | SLIT2     |
| SLITRK3   | -4.2346195 | 2.044461   | 0 | NA | NA      | SLITRK3   |
| SLITRK4   | 2.2845762  | 0.74566532 | 0 | NA | NA      | SLITRK4   |
| SMC4      | 3.2304147  | 0.66233649 | 0 | NA | NA      | SMC4      |
| SNCAIP    | -2.3999304 | 1.44456808 | 0 | NA | NA      | SNCAIP    |
| SOCS2     | -2.3828863 | 1.62618978 | 0 | NA | NA      | SOCS2     |
| SORCS1    | 4.3988439  | 0.48451882 | 0 | NA | SORCS1  | SORCS1    |
| SOX9      | 12.91514   | 0.11641769 | 0 | NA | NA      | SOX9      |
| SPIRE1    | 3.7605242  | 0.60874536 | 0 | NA | NA      | SPIRE1    |
| SPON1     | 5.0932677  | 0.30520412 | 0 | NA | SPON1   | SPON1     |
| SRI       | -2.2418818 | 1.30176061 | 0 | NA | NA      | SRI       |
| SSTR1     | 2.2225815  | 0.45025199 | 0 | NA | NA      | SSTR1     |
| ST3GAL1   | 2.3076774  | 0.65009901 | 0 | NA | NA      | ST3GAL1   |
| ST6GAL2   | 4.5318538  | 0.44398221 | 0 | NA | NA      | ST6GAL2   |
| ST8SIA3   | -2.4241874 | 1.47965344 | 0 | NA | ST8SIA3 | ST8SIA3   |
| STARD4    | 3.0072284  | 0.63499894 | 0 | NA | NA      | STARD4    |
| STK31     | 3.157706   | 0.29964372 | 0 | NA | NA      | STK31     |
| STXBP6    | -7.5596973 | 3.29939452 | 0 | NA | STXBP6  | STXBP6    |
| SULF1     | -4.571398  | 2.76779119 | 0 | NA | NA      | SULF1     |
| SULF2     | -4.7353515 | 2.57250946 | 0 | NA | SULF2   | SULF2     |
| SVIP      | 3.1539867  | 0.63591265 | 0 | NA | NA      | SVIP      |
| SYNE1     | 2.7432808  | 0.71460998 | 0 | NA | SYNE1   | SYNE1     |
| SYNM      | -3.2827036 | 1.63034073 | 0 | NA | SYNM    | SYNM      |
| SYNPR     | 2.2112118  | 0.6402151  | 0 | NA | NA      | SYNPR     |
| TACR2     | 2.2351101  | 0.65506084 | 0 | NA | NA      | TACR2     |
| TAL2      | -2.8474592 | 1.98116717 | 0 | NA | NA      | TAL2      |
| TBC1D8    | 3.2520082  | 0.56460283 | 0 | NA | NA      | TBC1D8    |
| TCF7L2    | -2.7195924 | 1.46882282 | 0 | NA | NA      | TCF7L2    |
| TDRD7     | 2.4033651  | 0.71213719 | 0 | NA | NA      | TDRD7     |
| TGFA      | 3.641964   | 0.59550569 | 0 | NA | NA      | TGFA      |

|            |            |            |   |            |            |            |
|------------|------------|------------|---|------------|------------|------------|
| TGFB2      | 5.2878672  | 0.38054757 | 0 | NA         | NA         | TGFB2      |
| TGFBR1     | 2.4199176  | 0.6526334  | 0 | NA         | NA         | TGFBR1     |
| THSD7A     | 3.3056219  | 0.55085256 | 0 | NA         | NA         | THSD7A     |
| TLE1       | 9.2333799  | 0.33331922 | 0 | NA         | TLE1       | TLE1       |
| TLK1       | 3.19175    | 0.6193214  | 0 | NA         | NA         | TLK1       |
| TMCC2      | 2.363984   | 0.72802771 | 0 | NA         | TMCC2      | TMCC2      |
| TMEM200A   | 4.5987098  | 0.48562263 | 0 | NA         | NA         | TMEM200A   |
| TMEM35     | -2.2798528 | 1.40446853 | 0 | NA         | NA         | TMEM35     |
| TNFRSF21   | -2.2771288 | 1.33797149 | 0 | NA         | NA         | TNFRSF21   |
| TNKS2      | 2.4188874  | 0.6724906  | 0 | NA         | NA         | TNKS2      |
| TOX        | -6.2470255 | 3.16050207 | 0 | NA         | TOX        | TOX        |
| TP53I3     | -4.5234967 | 2.3275304  | 0 | NA         | NA         | TP53I3     |
| TPBG       | -2.3870222 | 1.57377889 | 0 | NA         | TPBG       | TPBG       |
| TRH        | -4.3485877 | 1.92544255 | 0 | NA         | TRH        | TRH        |
| TRPC4      | 5.6127943  | 0.39063655 | 0 | NA         | NA         | TRPC4      |
| TRPC7      | 3.4270364  | 0.44069231 | 0 | NA         | NA         | TRPC7      |
| TSHZ1      | -2.7662182 | 1.5240847  | 0 | NA         | NA         | TSHZ1      |
| TSHZ3      | -4.8185133 | 2.42675149 | 0 | NA         | NA         | TSHZ3      |
| UFM1       | 2.5808817  | 0.67122313 | 0 | NA         | NA         | UFM1       |
| UNC13C     | 5.2100561  | 0.37864663 | 0 | NA         | NA         | UNC13C     |
| USP46      | 2.7529312  | 0.69716762 | 0 | NA         | NA         | USP46      |
| UST        | -2.3511955 | 1.63237533 | 0 | NA         | NA         | UST        |
| WBSCR17    | -3.4505242 | 1.54274478 | 0 | NA         | WBSCR17    | WBSCR17    |
| WIF1       | 2.9832351  | 0.33811108 | 0 | NA         | NA         | WIF1       |
| WNT11      | -2.185204  | 1.57874503 | 0 | NA         | WNT11      | WNT11      |
| WNT7B      | 3.4683119  | 0.48789458 | 0 | NA         | NA         | WNT7B      |
| XK         | 2.2480153  | 0.63144829 | 0 | NA         | NA         | XK         |
| ZNF114     | -3.8851986 | 2.8202289  | 0 | NA         | NA         | ZNF114     |
| ZNF238     | 2.8390867  | 0.596913   | 0 | NA         | ZNF238     | ZNF238     |
| ZNF385B    | 3.1447634  | 0.46473021 | 0 | NA         | NA         | ZNF385B    |
| ZNF423     | -6.9022481 | 4.59746511 | 0 | NA         | ZNF423     | ZNF423     |
| ZNF503     | 2.7163132  | 0.66857216 | 0 | NA         | NA         | ZNF503     |
| ZNF618     | 2.4840875  | 0.73010905 | 0 | NA         | NA         | ZNF618     |
| NCAM2      | 3.8690279  | 0.48696699 | 0 | NCAM2      | NCAM2      | NCAM2      |
| NDST3      | -5.1022264 | 3.64574782 | 0 | NDST3      | NA         | NDST3      |
| OPCML      | 3.7307845  | 0.52898093 | 0 | OPCML      | OPCML      | OPCML      |
| PART1      | -4.6456628 | 2.46597251 | 0 | PART1      | PART1      | PART1      |
| PCDH10     | -5.8434513 | 2.90835591 | 0 | PCDH10     | NA         | PCDH10     |
| PCDH7      | 4.9943541  | 0.52826125 | 0 | PCDH7      | PCDH7      | PCDH7      |
| PCDH9      | 5.6119571  | 0.38338733 | 0 | PCDH9      | PCDH9      | PCDH9      |
| PLEKHH2    | 2.7074491  | 0.60084142 | 0 | PLEKHH2    | NA         | PLEKHH2    |
| PLK2       | -4.1808613 | 1.84061633 | 0 | PLK2       | NA         | PLK2       |
| POU3F2     | -2.9474857 | 1.60823013 | 0 | POU3F2     | NA         | POU3F2     |
| POU3F3     | -2.3728614 | 1.478081   | 0 | POU3F3     | POU3F3     | POU3F3     |
| PRAGMIN    | -5.4987885 | 2.1050636  | 0 | PRAGMIN    | PRAGMIN    | PRAGMIN    |
| PRR16      | 7.3717628  | 0.20836697 | 0 | PRR16      | PRR16      | PRR16      |
| RAB23      | 2.6716488  | 0.69797553 | 0 | RAB23      | NA         | RAB23      |
| ROBO1      | -2.1733223 | 1.36044369 | 0 | ROBO1      | ROBO1      | ROBO1      |
| RSPO2      | 4.4727342  | 0.45629497 | 0 | RSPO2      | NA         | RSPO2      |
| SDK1       | -8.517135  | 2.97888689 | 0 | SDK1       | NA         | SDK1       |
| SLITRK1    | -2.3569568 | 1.36395396 | 0 | SLITRK1    | NA         | SLITRK1    |
| SORCS3     | 3.7751832  | 0.46911502 | 0 | SORCS3     | SORCS3     | SORCS3     |
| SPATA18    | -2.9348408 | 1.57045958 | 0 | SPATA18    | NA         | SPATA18    |
| ST6GALNAC5 | -6.0992162 | 2.36657776 | 0 | ST6GALNAC5 | ST6GALNAC5 | ST6GALNAC5 |
| TCERG1L    | -4.262795  | 2.66773624 | 0 | TCERG1L    | NA         | TCERG1L    |
| TFAP2D     | -3.5078229 | 3.65801776 | 0 | TFAP2D     | TFAP2D     | TFAP2D     |
| THBS1      | 5.2207093  | 0.27836758 | 0 | THBS1      | NA         | THBS1      |
| TMCC3      | 2.9003394  | 0.62058748 | 0 | TMCC3      | NA         | TMCC3      |

|           |            |            |            |          |          |           |
|-----------|------------|------------|------------|----------|----------|-----------|
| TRHDE     | 7.4632306  | 0.22727706 | 0          | TRHDE    | TRHDE    | TRHDE     |
| VSTM2L    | -7.6922484 | 5.1814054  | 0          | VSTM2L   | NA       | VSTM2L    |
| YES1      | -3.7572556 | 1.84409437 | 0          | YES1     | YES1     | YES1      |
| ZBTB20    | -2.2143973 | 1.32042789 | 0          | ZBTB20   | ZBTB20   | ZBTB20    |
| ARAP2     | 2.1194073  | 0.7517203  | 0.11329523 | ARAP2    | ARAP2    | ARAP2     |
| ARHGAP15  | 2.0953211  | 0.73642574 | 0.11329523 | ARHGAP15 | ARHGAP15 | ARHGAP15  |
| EFNB2     | 2.0686762  | 0.67820706 | 0.11329523 | EFNB2    | EFNB2    | EFNB2     |
| ELAVL2    | -2.000231  | 1.49945115 | 0.11329523 | ELAVL2   | ELAVL2   | ELAVL2    |
| ETV5      | 2.0643668  | 0.73596483 | 0.11329523 | ETV5     | NA       | ETV5      |
| FLJ42709  | 2.0428552  | 0.71173922 | 0.11329523 | FLJ42709 | FLJ42709 | FLJ42709  |
| GLIS3     | -2.1030173 | 1.66495303 | 0.11329523 | GLIS3    | GLIS3    | GLIS3     |
| ABHD6     | 2.0503227  | 0.76084925 | 0.11329523 | NA       | NA       | ABHD6     |
| ADIPOR2   | 2.1669984  | 0.75632768 | 0.11329523 | NA       | NA       | ADIPOR2   |
| ADSSL1    | -2.024042  | 1.31061038 | 0.11329523 | NA       | NA       | ADSSL1    |
| AGFG1     | 2.1688378  | 0.76608477 | 0.11329523 | NA       | NA       | AGFG1     |
| AJAP1     | -2.0384512 | 1.31571584 | 0.11329523 | NA       | NA       | AJAP1     |
| AKR1C1    | -2.1625288 | 1.35573308 | 0.11329523 | NA       | NA       | AKR1C1    |
| ANKRD29   | -2.0779442 | 1.53237741 | 0.11329523 | NA       | NA       | ANKRD29   |
| AP1S2     | 2.1771745  | 0.7818732  | 0.11329523 | NA       | NA       | AP1S2     |
| BVES      | -2.0094566 | 1.44099132 | 0.11329523 | NA       | NA       | BVES      |
| C13orf36  | -2.0945015 | 2.13159181 | 0.11329523 | NA       | NA       | C13orf36  |
| C1orf173  | 2.1605387  | 0.65197987 | 0.11329523 | NA       | NA       | C1orf173  |
| C3orf50   | -2.036135  | 1.98550562 | 0.11329523 | NA       | NA       | C3orf50   |
| C5orf4    | 2.0449505  | 0.75038304 | 0.11329523 | NA       | C5orf4   | C5orf4    |
| C7orf36   | -2.157551  | 1.48566933 | 0.11329523 | NA       | NA       | C7orf36   |
| CBARA1    | -2.0722511 | 1.36405196 | 0.11329523 | NA       | NA       | CBARA1    |
| DPF3      | -1.9948572 | 1.32280327 | 0.11329523 | NA       | DPF3     | DPF3      |
| DRD1      | -2.1159006 | 1.84786237 | 0.11329523 | NA       | NA       | DRD1      |
| EBPL      | -2.0174033 | 1.31289045 | 0.11329523 | NA       | NA       | EBPL      |
| EIF3E     | 2.1041583  | 0.79564492 | 0.11329523 | NA       | EIF3E    | EIF3E     |
| EML6      | 2.0822228  | 0.71419206 | 0.11329523 | NA       | NA       | EML6      |
| EMX1      | 2.0036574  | 0.73095406 | 0.11329523 | NA       | NA       | EMX1      |
| FRY       | 2.1460488  | 0.74024331 | 0.11329523 | NA       | NA       | FRY       |
| GGCT      | -2.0093063 | 1.27766155 | 0.11329523 | NA       | NA       | GGCT      |
| GGTA1     | -2.1053034 | 1.54639322 | 0.11329523 | NA       | GGTA1    | GGTA1     |
| GOLGA7B   | -2.1550231 | 1.44318056 | 0.11329523 | NA       | GOLGA7B  | GOLGA7B   |
| GPAM      | 2.140471   | 0.68699697 | 0.11329523 | NA       | GPAM     | GPAM      |
| GRIK1     | 2.0950291  | 0.68395149 | 0.11329523 | NA       | NA       | GRIK1     |
| GRIK2     | -2.1000341 | 1.32784063 | 0.11329523 | NA       | GRIK2    | GRIK2     |
| GRM5      | -2.0873797 | 1.32209824 | 0.11329523 | NA       | NA       | GRM5      |
| GRM7      | -1.9945815 | 1.33335681 | 0.11329523 | NA       | GRM7     | GRM7      |
| HAS2      | 2.0574799  | 0.6831462  | 0.11329523 | NA       | NA       | HAS2      |
| HSPB3     | -2.111997  | 1.51116191 | 0.11329523 | NA       | HSPB3    | HSPB3     |
| HTR7      | 2.0742972  | 0.71424476 | 0.11329523 | NA       | HTR7     | HTR7      |
| LOC387763 | 2.0187893  | 0.76468361 | 0.11329523 | NA       | NA       | LOC387763 |
| LRRC7     | 2.1384318  | 0.73077893 | 0.11329523 | NA       | NA       | LRRC7     |
| MYF6      | -2.0699629 | 1.36606021 | 0.11329523 | NA       | NA       | MYF6      |
| NECAB1    | 2.0109467  | 0.68407983 | 0.11329523 | NA       | NA       | NECAB1    |
| NEDD4     | 2.1359013  | 0.73156625 | 0.11329523 | NA       | NA       | NEDD4     |
| NUAK2     | 2.0193351  | 0.72768633 | 0.11329523 | NA       | NA       | NUAK2     |
| OMG       | 2.0489617  | 0.72221266 | 0.11329523 | NA       | NA       | OMG       |
| PDGFD     | 2.180256   | 0.67258826 | 0.11329523 | NA       | NA       | PDGFD     |
| PDZD2     | 2.1692008  | 0.69590969 | 0.11329523 | NA       | NA       | PDZD2     |
| PGBD5     | -2.0289311 | 1.31080757 | 0.11329523 | NA       | NA       | PGBD5     |
| PTPRZ1    | 2.1107313  | 0.75631262 | 0.11329523 | NA       | NA       | PTPRZ1    |
| RAB11A    | -2.0923258 | 1.24803638 | 0.11329523 | NA       | NA       | RAB11A    |
| REM2      | -2.1261275 | 1.56858986 | 0.11329523 | NA       | NA       | REM2      |
| RFC3      | 2.091419   | 0.71567047 | 0.11329523 | NA       | NA       | RFC3      |

|          |            |            |            |          |         |          |
|----------|------------|------------|------------|----------|---------|----------|
| RSPH9    | 2.0134479  | 0.74456472 | 0.11329523 | NA       | NA      | RSPH9    |
| SATB2    | 2.0138674  | 0.6652304  | 0.11329523 | NA       | SATB2   | SATB2    |
| SERPINB6 | -2.0431848 | 1.28622809 | 0.11329523 | NA       | NA      | SERPINB6 |
| SERTAD2  | 2.1096883  | 0.74027596 | 0.11329523 | NA       | NA      | SERTAD2  |
| SFRS2B   | -2.1154615 | 1.27174603 | 0.11329523 | NA       | NA      | SFRS2B   |
| SH3BP4   | -2.1323932 | 1.35398485 | 0.11329523 | NA       | SH3BP4  | SH3BP4   |
| SLC17A5  | -2.1683251 | 1.35369328 | 0.11329523 | NA       | NA      | SLC17A5  |
| SLC26A8  | 2.0197541  | 0.66891371 | 0.11329523 | NA       | NA      | SLC26A8  |
| SLC27A2  | 2.1396481  | 0.7838011  | 0.11329523 | NA       | NA      | SLC27A2  |
| SMPDL3A  | 2.1051156  | 0.710081   | 0.11329523 | NA       | NA      | SMPDL3A  |
| SNHG8    | 2.029819   | 0.76749506 | 0.11329523 | NA       | NA      | SNHG8    |
| SV2B     | -2.1380977 | 1.40507555 | 0.11329523 | NA       | NA      | SV2B     |
| TAF4B    | 2.163867   | 0.73515042 | 0.11329523 | NA       | NA      | TAF4B    |
| TAPT1    | -2.0881596 | 1.24815485 | 0.11329523 | NA       | NA      | TAPT1    |
| TARBP1   | 2.0160223  | 0.77167533 | 0.11329523 | NA       | TARBP1  | TARBP1   |
| TBX21    | -2.0951755 | 1.50634971 | 0.11329523 | NA       | TBX21   | TBX21    |
| NFIA     | -2.0249092 | 1.54756066 | 0.11329523 | NFIA     | NA      | NFIA     |
| NR4A3    | 2.0575626  | 0.77554613 | 0.11329523 | NR4A3    | NA      | NR4A3    |
| PMP22    | -2.1046144 | 1.88169418 | 0.11329523 | PMP22    | NA      | PMP22    |
| RPS6KA3  | 2.0394529  | 0.74879937 | 0.11329523 | RPS6KA3  | RPS6KA3 | RPS6KA3  |
| SNX16    | 2.0222737  | 0.73542514 | 0.11329523 | SNX16    | NA      | SNX16    |
| THRB     | -2.1344228 | 1.6017252  | 0.11329523 | THRB     | NA      | THRB     |
| C3orf58  | 1.9392572  | 0.78454523 | 0.19206239 | C3orf58  | NA      | C3orf58  |
| C8orf83  | 1.9837388  | 0.75462987 | 0.19206239 | C8orf83  | C8orf83 | C8orf83  |
| CNTNAP5  | 1.8672665  | 0.7789539  | 0.19206239 | CNTNAP5  | CNTNAP5 | CNTNAP5  |
| DNAJC1   | 1.8836523  | 0.7871951  | 0.19206239 | DNAJC1   | NA      | DNAJC1   |
| DOK6     | 1.968978   | 0.74194772 | 0.19206239 | DOK6     | NA      | DOK6     |
| ETV1     | 1.8694001  | 0.72920593 | 0.19206239 | ETV1     | ETV1    | ETV1     |
| FAM84A   | 1.882711   | 0.74357273 | 0.19206239 | FAM84A   | FAM84A  | FAM84A   |
| FANCL    | 1.9582831  | 0.77641708 | 0.19206239 | FANCL    | FANCL   | FANCL    |
| FBXL17   | 1.8906911  | 0.71481587 | 0.19206239 | FBXL17   | FBXL17  | FBXL17   |
| GRIA3    | 1.848451   | 0.74980662 | 0.19206239 | GRIA3    | GRIA3   | GRIA3    |
| KCNJ2    | 1.8946814  | 0.65167684 | 0.19206239 | KCNJ2    | NA      | KCNJ2    |
| KIAA0114 | 1.8648166  | 0.75999109 | 0.19206239 | KIAA0114 | NA      | KIAA0114 |
| LPHN3    | -1.935682  | 1.28725915 | 0.19206239 | LPHN3    | NA      | LPHN3    |
| MGST1    | 1.8604752  | 0.70169159 | 0.19206239 | MGST1    | MGST1   | MGST1    |
| ACVR1    | 1.9016813  | 0.74909317 | 0.19206239 | NA       | ACVR1   | ACVR1    |
| ADC      | 1.882217   | 0.74554495 | 0.19206239 | NA       | NA      | ADC      |
| ADCY1    | 1.8937999  | 0.78767214 | 0.19206239 | NA       | NA      | ADCY1    |
| AKAP13   | 1.8672226  | 0.77684803 | 0.19206239 | NA       | AKAP13  | AKAP13   |
| AKAP7    | -1.9212017 | 1.33142677 | 0.19206239 | NA       | NA      | AKAP7    |
| AKR1B1   | -1.8873825 | 1.26669329 | 0.19206239 | NA       | NA      | AKR1B1   |
| ALDH7A1  | -1.9677894 | 1.56588168 | 0.19206239 | NA       | NA      | ALDH7A1  |
| ANK2     | 1.9805793  | 0.68917144 | 0.19206239 | NA       | NA      | ANK2     |
| ANKRD6   | -1.9501876 | 1.4522325  | 0.19206239 | NA       | NA      | ANKRD6   |
| APBB2    | -1.9369471 | 1.33781927 | 0.19206239 | NA       | NA      | APBB2    |
| ARHGAP12 | 1.9922063  | 0.64834482 | 0.19206239 | NA       | NA      | ARHGAP12 |
| ARHGAP18 | 1.968179   | 0.70485716 | 0.19206239 | NA       | NA      | ARHGAP18 |
| ASS1     | -1.8757098 | 1.36348358 | 0.19206239 | NA       | ASS1    | ASS1     |
| ATP2C1   | 1.8198191  | 0.76723843 | 0.19206239 | NA       | NA      | ATP2C1   |
| BAI2     | 1.9038778  | 0.68664261 | 0.19206239 | NA       | NA      | BAI2     |
| C10orf58 | -1.9142667 | 1.24940341 | 0.19206239 | NA       | NA      | C10orf58 |
| C11orf75 | -1.9505339 | 1.68916961 | 0.19206239 | NA       | NA      | C11orf75 |
| C14orf37 | 1.9223885  | 0.66899015 | 0.19206239 | NA       | NA      | C14orf37 |
| C2orf3   | 1.8417981  | 0.75585756 | 0.19206239 | NA       | NA      | C2orf3   |
| C2orf7   | -1.8899315 | 1.31692006 | 0.19206239 | NA       | NA      | C2orf7   |
| C9orf45  | 1.9496523  | 0.75910403 | 0.19206239 | NA       | C9orf45 | C9orf45  |
| CAMKV    | 1.8540275  | 0.77291741 | 0.19206239 | NA       | NA      | CAMKV    |

|              |            |            |            |    |         |              |
|--------------|------------|------------|------------|----|---------|--------------|
| CAV1         | -1.8666365 | 1.46701097 | 0.19206239 | NA | NA      | CAV1         |
| CEP135       | 1.8777125  | 0.76959028 | 0.19206239 | NA | NA      | CEP135       |
| CYYR1        | -1.8344824 | 1.39509513 | 0.19206239 | NA | CYYR1   | CYYR1        |
| DEK          | 1.8585399  | 0.81623636 | 0.19206239 | NA | NA      | DEK          |
| DENND4C      | 1.8540265  | 0.79761758 | 0.19206239 | NA | NA      | DENND4C      |
| DPP3         | -1.8794705 | 1.2852484  | 0.19206239 | NA | DPP3    | DPP3         |
| DPYD         | 1.91158    | 0.75716218 | 0.19206239 | NA | DPYD    | DPYD         |
| DYNC2H1      | 1.9865679  | 0.71849855 | 0.19206239 | NA | NA      | DYNC2H1      |
| EIF3D        | 1.8358103  | 0.81949329 | 0.19206239 | NA | NA      | EIF3D        |
| EPB41L3      | 1.819643   | 0.72224433 | 0.19206239 | NA | NA      | EPB41L3      |
| FABP7        | 1.9955677  | 0.69389679 | 0.19206239 | NA | NA      | FABP7        |
| FAM43A       | -1.8784603 | 1.28227334 | 0.19206239 | NA | NA      | FAM43A       |
| FRMD4B       | -1.9884055 | 1.29900971 | 0.19206239 | NA | NA      | FRMD4B       |
| GCA          | 1.9918127  | 0.6942364  | 0.19206239 | NA | NA      | GCA          |
| GHRH         | -1.8694463 | 1.32426279 | 0.19206239 | NA | NA      | GHRH         |
| HCN1         | 1.8768348  | 0.75954513 | 0.19206239 | NA | NA      | HCN1         |
| HS3ST2       | -1.9807592 | 1.51306092 | 0.19206239 | NA | HS3ST2  | HS3ST2       |
| IGSF21       | 1.8198256  | 0.7643972  | 0.19206239 | NA | NA      | IGSF21       |
| IMPDH2       | 1.8557926  | 0.80768111 | 0.19206239 | NA | NA      | IMPDH2       |
| KCNAB1       | -1.9093715 | 1.39623488 | 0.19206239 | NA | NA      | KCNAB1       |
| KCNE1        | -1.9868154 | 1.38190226 | 0.19206239 | NA | NA      | KCNE1        |
| KLHL14       | -1.8384008 | 1.35188201 | 0.19206239 | NA | KLHL14  | KLHL14       |
| LOC100129550 | 1.8909605  | 0.74844148 | 0.19206239 | NA | NA      | LOC100129550 |
| LOC100134229 | -1.9667124 | 1.43010266 | 0.19206239 | NA | NA      | LOC100134229 |
| LOC151162    | -1.8938993 | 1.26626375 | 0.19206239 | NA | NA      | LOC151162    |
| LRRC8C       | -1.9658767 | 1.28337061 | 0.19206239 | NA | NA      | LRRC8C       |
| MYB          | -1.9590426 | 1.33546126 | 0.19206239 | NA | NA      | MYB          |
| MYC          | -1.8492218 | 1.26090084 | 0.19206239 | NA | NA      | MYC          |
| N4BP2L2      | 1.8287236  | 0.76511986 | 0.19206239 | NA | NA      | N4BP2L2      |
| NAP1L5       | -1.8801924 | 1.29018764 | 0.19206239 | NA | NA      | NAP1L5       |
| NOS1         | -1.9311619 | 1.2985339  | 0.19206239 | NA | NOS1    | NOS1         |
| NPNT         | -1.8799266 | 1.43839345 | 0.19206239 | NA | NA      | NPNT         |
| PAG1         | 1.9923476  | 0.75355565 | 0.19206239 | NA | NA      | PAG1         |
| PHF17        | 1.9406617  | 0.73516516 | 0.19206239 | NA | NA      | PHF17        |
| PITPNC1      | -1.9241893 | 1.28031768 | 0.19206239 | NA | NA      | PITPNC1      |
| PLCXD2       | -1.8698634 | 1.26021415 | 0.19206239 | NA | NA      | PLCXD2       |
| PLOD2        | 1.8199163  | 0.63535707 | 0.19206239 | NA | PLOD2   | PLOD2        |
| RAB2B        | -1.8679581 | 1.22997804 | 0.19206239 | NA | NA      | RAB2B        |
| RHPN2        | 1.9213888  | 0.73483556 | 0.19206239 | NA | NA      | RHPN2        |
| RIN2         | 1.9573726  | 0.76035393 | 0.19206239 | NA | NA      | RIN2         |
| RP1-177G6.2  | 1.9769926  | 0.56392297 | 0.19206239 | NA | NA      | RP1-177G6.2  |
| RPH3A        | -1.8374374 | 1.75038429 | 0.19206239 | NA | NA      | RPH3A        |
| RPL37        | 1.8538167  | 0.80050686 | 0.19206239 | NA | NA      | RPL37        |
| RSL24D1      | 1.9607116  | 0.76287592 | 0.19206239 | NA | RSL24D1 | RSL24D1      |
| SCNN1G       | -1.9659273 | 1.41568303 | 0.19206239 | NA | NA      | SCNN1G       |
| SLC46A3      | -1.8978447 | 1.28379808 | 0.19206239 | NA | NA      | SLC46A3      |
| SNAI2        | -1.8931277 | 1.42988906 | 0.19206239 | NA | NA      | SNAI2        |
| SNX9         | 1.8759538  | 0.72844561 | 0.19206239 | NA | SNX9    | SNX9         |
| SUPT3H       | -1.8828569 | 1.41033346 | 0.19206239 | NA | NA      | SUPT3H       |
| SYDE2        | -1.9700165 | 1.40108213 | 0.19206239 | NA | NA      | SYDE2        |
| TIAM2        | 1.9183267  | 0.7270701  | 0.19206239 | NA | NA      | TIAM2        |
| TMEM74       | 1.9308704  | 0.72485958 | 0.19206239 | NA | NA      | TMEM74       |
| TMTC1        | 1.9325874  | 0.60091483 | 0.19206239 | NA | NA      | TMTC1        |
| TRIM44       | 1.9809887  | 0.76321079 | 0.19206239 | NA | NA      | TRIM44       |
| TSPAN18      | -1.941617  | 1.23064855 | 0.19206239 | NA | NA      | TSPAN18      |
| TSPAN6       | -1.9717261 | 1.54699507 | 0.19206239 | NA | NA      | TSPAN6       |

|          |            |            |            |        |          |          |
|----------|------------|------------|------------|--------|----------|----------|
| WNT3     | -1.8373978 | 1.28145237 | 0.19206239 | NA     | NA       | WNT3     |
| WNT5B    | 1.9573525  | 0.78654814 | 0.19206239 | NA     | NA       | WNT5B    |
| ZADH2    | -1.9388644 | 1.33605933 | 0.19206239 | NA     | ZADH2    | ZADH2    |
| ZNF438   | 1.9131199  | 0.79043807 | 0.19206239 | NA     | NA       | ZNF438   |
| ZNF706   | -1.8489992 | 1.22405684 | 0.19206239 | NA     | ZNF706   | ZNF706   |
| NLGN1    | 1.9729994  | 0.70393173 | 0.19206239 | NLGN1  | NLGN1    | NLGN1    |
| PARP8    | -1.8990028 | 1.45305744 | 0.19206239 | PARP8  | PARP8    | PARP8    |
| PLCB4    | -1.9883246 | 1.38632628 | 0.19206239 | PLCB4  | NA       | PLCB4    |
| POU3F1   | -1.895519  | 1.42385159 | 0.19206239 | POU3F1 | POU3F1   | POU3F1   |
| PRKD1    | -1.9272667 | 1.32258417 | 0.19206239 | PRKD1  | PRKD1    | PRKD1    |
| SATB1    | 1.8658506  | 0.79817306 | 0.19206239 | SATB1  | SATB1    | SATB1    |
| XYLT1    | 1.9222051  | 0.80021924 | 0.19206239 | XYLT1  | XYLT1    | XYLT1    |
| BIN1     | -1.7670401 | 1.42300715 | 0.56921718 | BIN1   | NA       | BIN1     |
| CA8      | -1.7263499 | 1.23979534 | 0.56921718 | CA8    | CA8      | CA8      |
| CDH11    | -1.6807595 | 1.26770628 | 0.56921718 | CDH11  | CDH11    | CDH11    |
| DCTD     | -1.7916642 | 1.25421313 | 0.56921718 | DCTD   | DCTD     | DCTD     |
| DIO2     | -1.6845813 | 1.34564495 | 0.56921718 | DIO2   | DIO2     | DIO2     |
| LRRTM1   | -1.7425734 | 1.47680773 | 0.56921718 | LRRTM1 | LRRTM1   | LRRTM1   |
| ABI2     | 1.8002732  | 0.78889966 | 0.56921718 | NA     | NA       | ABI2     |
| ADD2     | 1.7072329  | 0.79782557 | 0.56921718 | NA     | NA       | ADD2     |
| AHR      | 1.7311067  | 0.74526905 | 0.56921718 | NA     | NA       | AHR      |
| ALS2     | 1.730133   | 0.77799375 | 0.56921718 | NA     | NA       | ALS2     |
| AMMECR1  | 1.7897814  | 0.77927582 | 0.56921718 | NA     | NA       | AMMECR1  |
| AMOTL1   | -1.6708045 | 1.2233893  | 0.56921718 | NA     | AMOTL1   | AMOTL1   |
| ARHGEF3  | -1.6834136 | 1.22494225 | 0.56921718 | NA     | NA       | ARHGEF3  |
| ARL4C    | -1.7089553 | 1.21333535 | 0.56921718 | NA     | NA       | ARL4C    |
| ATP2B1   | 1.7101363  | 0.78636865 | 0.56921718 | NA     | NA       | ATP2B1   |
| B3GALTL  | -1.7134436 | 1.54733497 | 0.56921718 | NA     | NA       | B3GALTL  |
| BCAP29   | 1.77772    | 0.79518995 | 0.56921718 | NA     | NA       | BCAP29   |
| BCAR3    | 1.6554876  | 0.78105918 | 0.56921718 | NA     | NA       | BCAR3    |
| C17orf58 | -1.664373  | 1.25174985 | 0.56921718 | NA     | NA       | C17orf58 |
| C1orf201 | 1.6867839  | 0.76162761 | 0.56921718 | NA     | C1orf201 | C1orf201 |
| CABP1    | 1.7476754  | 0.72210881 | 0.56921718 | NA     | NA       | CABP1    |
| CHD3     | 1.7570376  | 0.74835474 | 0.56921718 | NA     | NA       | CHD3     |
| CHGB     | 1.6889775  | 0.80786526 | 0.56921718 | NA     | CHGB     | CHGB     |
| CHRNA1   | -1.6878377 | 1.30251577 | 0.56921718 | NA     | NA       | CHRNA1   |
| CSMD2    | 1.6504898  | 0.78251864 | 0.56921718 | NA     | NA       | CSMD2    |
| CTGF     | -1.7315289 | 1.50144371 | 0.56921718 | NA     | NA       | CTGF     |
| DGKH     | 1.6708511  | 0.81766292 | 0.56921718 | NA     | NA       | DGKH     |
| DIAPH3   | -1.691133  | 1.316908   | 0.56921718 | NA     | DIAPH3   | DIAPH3   |
| DNAJC12  | -1.779901  | 1.33330638 | 0.56921718 | NA     | NA       | DNAJC12  |
| DUSP6    | -1.6648534 | 1.34244361 | 0.56921718 | NA     | DUSP6    | DUSP6    |
| E2F3     | -1.7467634 | 1.27894087 | 0.56921718 | NA     | NA       | E2F3     |
| ECHDC3   | 1.7663812  | 0.70254225 | 0.56921718 | NA     | NA       | ECHDC3   |
| FBXL4    | 1.7030863  | 0.74322208 | 0.56921718 | NA     | FBXL4    | FBXL4    |
| FGFR1    | -1.7778665 | 1.21511311 | 0.56921718 | NA     | NA       | FGFR1    |
| FNDC3B   | 1.7206151  | 0.81477116 | 0.56921718 | NA     | NA       | FNDC3B   |
| FOSL2    | -1.8048882 | 1.39235042 | 0.56921718 | NA     | FOSL2    | FOSL2    |
| FTL      | -1.6927348 | 1.23643025 | 0.56921718 | NA     | NA       | FTL      |
| GNAL     | -1.6730574 | 1.82837731 | 0.56921718 | NA     | NA       | GNAL     |
| GPR137C  | -1.7683416 | 1.45479059 | 0.56921718 | NA     | NA       | GPR137C  |
| GPR63    | 1.7023713  | 0.67572853 | 0.56921718 | NA     | NA       | GPR63    |
| GRM3     | 1.7963915  | 0.79517321 | 0.56921718 | NA     | GRM3     | GRM3     |
| HEATR1   | 1.7673478  | 0.6703171  | 0.56921718 | NA     | NA       | HEATR1   |
| HSPA4L   | 1.7627049  | 0.69399936 | 0.56921718 | NA     | NA       | HSPA4L   |
| HYMAI    | 1.7725019  | 0.66603623 | 0.56921718 | NA     | NA       | HYMAI    |
| ID4      | -1.714183  | 1.24941014 | 0.56921718 | NA     | ID4      | ID4      |
| IPO8     | 1.7151015  | 0.7815551  | 0.56921718 | NA     | NA       | IPO8     |

|           |            |            |            |         |          |           |
|-----------|------------|------------|------------|---------|----------|-----------|
| JAK2      | 1.766462   | 0.78345728 | 0.56921718 | NA      | NA       | JAK2      |
| KCNK2     | -1.6590451 | 1.31587451 | 0.56921718 | NA      | NA       | KCNK2     |
| KLHL25    | 1.6601986  | 0.75803502 | 0.56921718 | NA      | NA       | KLHL25    |
| LOC401097 | 1.7677791  | 0.6990811  | 0.56921718 | NA      | NA       | LOC401097 |
| LRRC4C    | 1.7723172  | 0.78380855 | 0.56921718 | NA      | LRRC4C   | LRRC4C    |
| LYSMD3    | 1.6959089  | 0.74857584 | 0.56921718 | NA      | NA       | LYSMD3    |
| MAN2A1    | 1.7357733  | 0.68817559 | 0.56921718 | NA      | NA       | MAN2A1    |
| MAOA      | -1.7230175 | 1.26439033 | 0.56921718 | NA      | MAOA     | MAOA      |
| MIAT      | 1.6685052  | 0.7468721  | 0.56921718 | NA      | MIAT     | MIAT      |
| NALCN     | -1.7134353 | 1.33890556 | 0.56921718 | NA      | NA       | NALCN     |
| NEFM      | 1.8104381  | 0.76583052 | 0.56921718 | NA      | NA       | NEFM      |
| NGB       | 1.6973064  | 0.81316304 | 0.56921718 | NA      | NGB      | NGB       |
| NR2F2     | 1.6810585  | 0.78707751 | 0.56921718 | NA      | NR2F2    | NR2F2     |
| NRXN3     | -1.6779785 | 1.23251032 | 0.56921718 | NA      | NRXN3    | NRXN3     |
| OAT       | -1.665461  | 1.23767024 | 0.56921718 | NA      | NA       | OAT       |
| PAQR8     | -1.6793243 | 1.3547052  | 0.56921718 | NA      | NA       | PAQR8     |
| PCOTH     | -1.7710008 | 1.2697666  | 0.56921718 | NA      | NA       | PCOTH     |
| PLXNC1    | -1.7689523 | 1.29644548 | 0.56921718 | NA      | PLXNC1   | PLXNC1    |
| PPA2      | -1.716176  | 1.29695608 | 0.56921718 | NA      | NA       | PPA2      |
| PPP1R3C   | -1.7865883 | 1.27858437 | 0.56921718 | NA      | NA       | PPP1R3C   |
| PRDM10    | 1.7214244  | 0.80448983 | 0.56921718 | NA      | NA       | PRDM10    |
| QPCT      | -1.6989685 | 1.52267803 | 0.56921718 | NA      | NA       | QPCT      |
| RAPGEFL1  | 1.7176713  | 0.71074745 | 0.56921718 | NA      | RAPGEFL1 | RAPGEFL1  |
| RBM24     | 1.7236535  | 0.77326309 | 0.56921718 | NA      | NA       | RBM24     |
| RGS16     | -1.6671199 | 1.33345675 | 0.56921718 | NA      | NA       | RGS16     |
| RUNX2     | -1.6858028 | 1.28467826 | 0.56921718 | NA      | RUNX2    | RUNX2     |
| SAMD3     | 1.8075569  | 0.77995226 | 0.56921718 | NA      | NA       | SAMD3     |
| SCRN1     | 1.7554073  | 0.77450968 | 0.56921718 | NA      | NA       | SCRN1     |
| SEMA3C    | -1.6712737 | 1.36815885 | 0.56921718 | NA      | NA       | SEMA3C    |
| SHB       | 1.7365438  | 0.81139146 | 0.56921718 | NA      | NA       | SHB       |
| SIPA1L2   | 1.7967593  | 0.81728709 | 0.56921718 | NA      | NA       | SIPA1L2   |
| SLC17A8   | -1.6870861 | 1.51521774 | 0.56921718 | NA      | NA       | SLC17A8   |
| SMAD3     | 1.7388772  | 0.78593321 | 0.56921718 | NA      | SMAD3    | SMAD3     |
| SPATA13   | -1.6937885 | 1.32035141 | 0.56921718 | NA      | NA       | SPATA13   |
| SYT9      | -1.7174943 | 1.24831857 | 0.56921718 | NA      | NA       | SYT9      |
| TBC1D1    | -1.7283841 | 1.22658604 | 0.56921718 | NA      | NA       | TBC1D1    |
| TBR1      | -1.7852788 | 1.28154788 | 0.56921718 | NA      | NA       | TBR1      |
| TNFAIP3   | -1.7459981 | 1.72654034 | 0.56921718 | NA      | NA       | TNFAIP3   |
| UBP1      | 1.7354988  | 0.76318925 | 0.56921718 | NA      | NA       | UBP1      |
| VEPH1     | -1.6686711 | 1.21287794 | 0.56921718 | NA      | NA       | VEPH1     |
| WWP2      | -1.6644297 | 1.26294759 | 0.56921718 | NA      | NA       | WWP2      |
| ZAK       | 1.670217   | 0.71519869 | 0.56921718 | NA      | ZAK      | ZAK       |
| ZHX2      | 1.7521996  | 0.76600304 | 0.56921718 | NA      | ZHX2     | ZHX2      |
| NMNAT3    | -1.7568169 | 1.32096251 | 0.56921718 | NMNAT3  | NA       | NMNAT3    |
| NTN1      | -1.7302086 | 1.30085813 | 0.56921718 | NTN1    | NA       | NTN1      |
| PBX1      | -1.7364712 | 1.3212575  | 0.56921718 | PBX1    | NA       | PBX1      |
| PTPRG     | 1.7029704  | 0.73794978 | 0.56921718 | PTPRG   | PTPRG    | PTPRG     |
| RAP1GAP   | 1.7936958  | 0.72250668 | 0.56921718 | RAP1GAP | RAP1GAP  | RAP1GAP   |
| SLC35F4   | -1.7080815 | 1.50640057 | 0.56921718 | SLC35F4 | SLC35F4  | SLC35F4   |
| TCF4      | 1.7294234  | 0.77062722 | 0.56921718 | TCF4    | NA       | TCF4      |
| VRK2      | 1.6716374  | 0.6899739  | 0.56921718 | VRK2    | VRK2     | VRK2      |
| ZNF703    | -1.7219587 | 1.2649145  | 0.56921718 | ZNF703  | ZNF703   | ZNF703    |
| CADM1     | 1.5423172  | 0.78415892 | 0.88419955 | CADM1   | CADM1    | CADM1     |
| CADM2     | 1.6480507  | 0.78473465 | 0.88419955 | CADM2   | CADM2    | CADM2     |
| CDC73     | 1.5686281  | 0.79791535 | 0.88419955 | CDC73   | CDC73    | CDC73     |
| CSMD3     | -1.5303673 | 1.2347212  | 0.88419955 | CSMD3   | NA       | CSMD3     |
| EFNA5     | 1.6238383  | 0.80556294 | 0.88419955 | EFNA5   | EFNA5    | EFNA5     |
| ETV6      | -1.5174112 | 1.34083786 | 0.88419955 | ETV6    | NA       | ETV6      |



|           |            |            |            |           |           |           |
|-----------|------------|------------|------------|-----------|-----------|-----------|
| FTSJD1    | 1.615738   | 0.73069219 | 0.88419955 | FTSJD1    | NA        | FTSJD1    |
| HNMT      | 1.6412867  | 0.77996165 | 0.88419955 | HNMT      | HNMT      | HNMT      |
| ITGA4     | 1.5542557  | 0.80397129 | 0.88419955 | ITGA4     | NA        | ITGA4     |
| KIF16B    | 1.6187313  | 0.77976982 | 0.88419955 | KIF16B    | KIF16B    | KIF16B    |
| LMO1      | 1.5536779  | 0.74571502 | 0.88419955 | LMO1      | LMO1      | LMO1      |
| LOC220930 | 1.5258504  | 0.73363307 | 0.88419955 | LOC220930 | LOC220930 | LOC220930 |
| AMIGO2    | 1.5389169  | 0.79046747 | 0.88419955 | NA        | NA        | AMIGO2    |
| ASPH      | 1.6025921  | 0.81486279 | 0.88419955 | NA        | NA        | ASPH      |
| AUH       | 1.5088174  | 0.79367185 | 0.88419955 | NA        | AUH       | AUH       |
| BCL2      | 1.6262094  | 0.72497361 | 0.88419955 | NA        | NA        | BCL2      |
| BRAF      | 1.6067269  | 0.77384768 | 0.88419955 | NA        | NA        | BRAF      |
| C11orf87  | -1.5472354 | 1.41698678 | 0.88419955 | NA        | NA        | C11orf87  |
| C1GALT1   | -1.5028948 | 1.27063069 | 0.88419955 | NA        | NA        | C1GALT1   |
| C6orf138  | -1.6177315 | 1.37118745 | 0.88419955 | NA        | NA        | C6orf138  |
| CAPZA2    | 1.4915659  | 0.82907958 | 0.88419955 | NA        | NA        | CAPZA2    |
| CCDC152   | 1.5109192  | 0.81777537 | 0.88419955 | NA        | NA        | CCDC152   |
| CDH13     | 1.5766612  | 0.71012446 | 0.88419955 | NA        | CDH13     | CDH13     |
| CDK8      | 1.6055934  | 0.82417525 | 0.88419955 | NA        | NA        | CDK8      |
| CLCC1     | -1.5448079 | 1.28666703 | 0.88419955 | NA        | NA        | CLCC1     |
| CLCN4     | -1.6496394 | 1.35400775 | 0.88419955 | NA        | CLCN4     | CLCN4     |
| CLCN5     | -1.6268313 | 1.230451   | 0.88419955 | NA        | NA        | CLCN5     |
| CLGN      | -1.6539475 | 1.5093067  | 0.88419955 | NA        | NA        | CLGN      |
| CLYBL     | 1.5408082  | 0.78965522 | 0.88419955 | NA        | NA        | CLYBL     |
| CPNE6     | -1.6220942 | 1.36472646 | 0.88419955 | NA        | NA        | CPNE6     |
| DCC       | -1.5468003 | 1.25641969 | 0.88419955 | NA        | DCC       | DCC       |
| DDHD1     | 1.6422988  | 0.76981857 | 0.88419955 | NA        | NA        | DDHD1     |
| DLEU2L    | 1.4927985  | 0.65515587 | 0.88419955 | NA        | NA        | DLEU2L    |
| DMXL1     | 1.5936059  | 0.79464748 | 0.88419955 | NA        | DMXL1     | DMXL1     |
| DNMT3A    | -1.6393412 | 1.26259462 | 0.88419955 | NA        | DNMT3A    | DNMT3A    |
| ELAVL4    | -1.588411  | 1.23423612 | 0.88419955 | NA        | NA        | ELAVL4    |
| FABP6     | -1.6316726 | 1.23861445 | 0.88419955 | NA        | NA        | FABP6     |
| GAS2L1    | 1.5550568  | 0.79647135 | 0.88419955 | NA        | NA        | GAS2L1    |
| GAS2L3    | 1.5920415  | 0.75218211 | 0.88419955 | NA        | NA        | GAS2L3    |
| GPD2      | 1.5940441  | 0.78962328 | 0.88419955 | NA        | NA        | GPD2      |
| GPR177    | -1.5759886 | 1.44536871 | 0.88419955 | NA        | NA        | GPR177    |
| GUCY1A3   | -1.5753948 | 1.37360364 | 0.88419955 | NA        | NA        | GUCY1A3   |
| IRF2      | -1.5233308 | 1.44229607 | 0.88419955 | NA        | NA        | IRF2      |
| JUN       | -1.6519549 | 1.47071215 | 0.88419955 | NA        | NA        | JUN       |
| KBTBD8    | 1.5720203  | 0.79932808 | 0.88419955 | NA        | KBTBD8    | KBTBD8    |
| KEAP1     | -1.5697444 | 1.24489759 | 0.88419955 | NA        | NA        | KEAP1     |
| KIAA1958  | -1.5262747 | 1.26307324 | 0.88419955 | NA        | KIAA1958  | KIAA1958  |
| KPNA2     | -1.5666428 | 1.24652842 | 0.88419955 | NA        | NA        | KPNA2     |
| MAN1C1    | 1.5184786  | 0.83719153 | 0.88419955 | NA        | NA        | MAN1C1    |
| MARK1     | 1.5520661  | 0.80040881 | 0.88419955 | NA        | MARK1     | MARK1     |
| MDH1      | 1.6458122  | 0.7827652  | 0.88419955 | NA        | MDH1      | MDH1      |
| MITF      | 1.626352   | 0.7826945  | 0.88419955 | NA        | MITF      | MITF      |
| MSH2      | -1.5195244 | 1.23633967 | 0.88419955 | NA        | NA        | MSH2      |
| MYO1B     | -1.6535742 | 1.26905342 | 0.88419955 | NA        | MYO1B     | MYO1B     |
| NBL1      | -1.5567805 | 1.26174467 | 0.88419955 | NA        | NA        | NBL1      |
| NPHP3     | 1.6046245  | 0.80858105 | 0.88419955 | NA        | NA        | NPHP3     |
| NRD1      | 1.5794877  | 0.77648009 | 0.88419955 | NA        | NA        | NRD1      |
| NUDCD1    | 1.5156774  | 0.76342572 | 0.88419955 | NA        | NA        | NUDCD1    |
| PACSL1    | 1.5554403  | 0.8116957  | 0.88419955 | NA        | NA        | PACSL1    |
| PPAT      | 1.5750822  | 0.79892128 | 0.88419955 | NA        | NA        | PPAT      |
| PPFIA2    | 1.6049976  | 0.82402652 | 0.88419955 | NA        | NA        | PPFIA2    |
| PPP2R5A   | 1.5226625  | 0.79373633 | 0.88419955 | NA        | NA        | PPP2R5A   |
| PRKCB     | 1.623504   | 0.7653644  | 0.88419955 | NA        | PRKCB     | PRKCB     |
| PRSS12    | 1.5393879  | 0.7075545  | 0.88419955 | NA        | NA        | PRSS12    |

|         |            |            |            |         |         |         |
|---------|------------|------------|------------|---------|---------|---------|
| PTGDS   | -1.5720961 | 1.54986996 | 0.88419955 | NA      | NA      | PTGDS   |
| RCC2    | -1.6074405 | 1.25214465 | 0.88419955 | NA      | NA      | RCC2    |
| RGMB    | 1.5259339  | 0.82087114 | 0.88419955 | NA      | NA      | RGMB    |
| RHOBTB1 | 1.5203465  | 0.80651117 | 0.88419955 | NA      | NA      | RHOBTB1 |
| RNF169  | 1.5327919  | 0.80108988 | 0.88419955 | NA      | NA      | RNF169  |
| RPL37A  | 1.5098859  | 0.80697164 | 0.88419955 | NA      | NA      | RPL37A  |
| RSPO3   | -1.5307645 | 1.28286727 | 0.88419955 | NA      | NA      | RSPO3   |
| SCG2    | -1.5585077 | 1.37500787 | 0.88419955 | NA      | NA      | SCG2    |
| SH3KBP1 | 1.6217678  | 0.81439028 | 0.88419955 | NA      | SH3KBP1 | SH3KBP1 |
| SLC44A5 | 1.5080185  | 0.7401177  | 0.88419955 | NA      | NA      | SLC44A5 |
| SLC5A3  | 1.6113967  | 0.81212852 | 0.88419955 | NA      | NA      | SLC5A3  |
| SMAD7   | 1.5822772  | 0.77254442 | 0.88419955 | NA      | SMAD7   | SMAD7   |
| SNX22   | 1.6470677  | 0.7752698  | 0.88419955 | NA      | NA      | SNX22   |
| SPRED2  | -1.5160014 | 1.21935135 | 0.88419955 | NA      | SPRED2  | SPRED2  |
| SSBP2   | 1.4973895  | 0.83258835 | 0.88419955 | NA      | NA      | SSBP2   |
| STAG2   | 1.5384991  | 0.80153576 | 0.88419955 | NA      | STAG2   | STAG2   |
| STARD13 | 1.5338506  | 0.81861749 | 0.88419955 | NA      | NA      | STARD13 |
| STRBP   | 1.5625995  | 0.76323323 | 0.88419955 | NA      | NA      | STRBP   |
| SYT13   | 1.5262234  | 0.77492133 | 0.88419955 | NA      | SYT13   | SYT13   |
| TDP1    | -1.6031528 | 1.24968789 | 0.88419955 | NA      | TDP1    | TDP1    |
| TF      | -1.5563084 | 1.25399026 | 0.88419955 | NA      | NA      | TF      |
| TGFB3   | -1.628569  | 1.28476102 | 0.88419955 | NA      | NA      | TGFB3   |
| TLN2    | 1.6341747  | 0.79796596 | 0.88419955 | NA      | NA      | TLN2    |
| TMEM47  | -1.6560851 | 1.2938101  | 0.88419955 | NA      | TMEM47  | TMEM47  |
| TMEM5   | -1.5773597 | 1.27996903 | 0.88419955 | NA      | TMEM5   | TMEM5   |
| TNRC6B  | 1.5843737  | 0.78946261 | 0.88419955 | NA      | NA      | TNRC6B  |
| TSEN15  | -1.6274658 | 1.29362016 | 0.88419955 | NA      | NA      | TSEN15  |
| UBE2L6  | -1.6195086 | 1.21735044 | 0.88419955 | NA      | NA      | UBE2L6  |
| UVRAG   | 1.5689983  | 0.81164414 | 0.88419955 | NA      | NA      | UVRAG   |
| ZDHHC23 | 1.5498989  | 0.74854916 | 0.88419955 | NA      | NA      | ZDHHC23 |
| ZNF365  | 1.6080121  | 0.78220485 | 0.88419955 | NA      | NA      | ZNF365  |
| ZNF395  | -1.598808  | 1.21514445 | 0.88419955 | NA      | ZNF395  | ZNF395  |
| NRCAM   | -1.5882778 | 1.23232595 | 0.88419955 | NRCAM   | NA      | NRCAM   |
| PTPRD   | 1.601349   | 0.82378207 | 0.88419955 | PTPRD   | PTPRD   | PTPRD   |
| SLC7A11 | -1.5125867 | 1.3357056  | 0.88419955 | SLC7A11 | NA      | SLC7A11 |
| STIM2   | 1.6017321  | 0.73637926 | 0.88419955 | STIM2   | NA      | STIM2   |
| UNC5C   | 1.5826048  | 0.82539105 | 0.88419955 | UNC5C   | UNC5C   | UNC5C   |

## **MAR-HAR PFOvsPT q<0.01**

| <b>SYMBOL</b> | <b>PFOvsPT.d</b> | <b>PFOvsPT.FC</b> | <b>PFOvsPT.q</b> | <b>HAR</b> | <b>CAR</b> | <b>MAR</b> |
|---------------|------------------|-------------------|------------------|------------|------------|------------|
| ACCN1         | -2.6307648       | 1.67979598        | 0                | NA         | ACCN1      | ACCN1      |
| ADAMTS16      | -2.3622011       | 1.76005451        | 0                | NA         | ADAMTS16   | ADAMTS16   |
| AK5           | 2.4672315        | 0.67898931        | 0                | NA         | AK5        | AK5        |
| ANKRD32       | -5.2441495       | 2.29550366        | 0                | NA         | ANKRD32    | ANKRD32    |
| APOO          | -2.2526913       | 1.32642345        | 0                | NA         | APOO       | APOO       |
| ARNTL         | 2.5357596        | 0.65285149        | 0                | NA         | ARNTL      | ARNTL      |
| CACNA2D3      | -5.0183639       | 2.37311616        | 0                | NA         | CACNA2D3   | CACNA2D3   |
| CBLN1         | -7.7041147       | 4.80719481        | 0                | NA         | CBLN1      | CBLN1      |
| CCDC109A      | -2.989666        | 1.63539425        | 0                | NA         | CCDC109A   | CCDC109A   |
| CDH12         | -3.0931634       | 1.70193601        | 0                | NA         | CDH12      | CDH12      |
| CDH9          | 3.3472538        | 0.50238639        | 0                | NA         | CDH9       | CDH9       |
| CEP120        | -2.8706623       | 1.55083986        | 0                | NA         | CEP120     | CEP120     |
| CGRRF1        | -4.1255188       | 2.23860247        | 0                | NA         | CGRRF1     | CGRRF1     |

|           |            |            |   |    |           |           |
|-----------|------------|------------|---|----|-----------|-----------|
| CNTN3     | -5.1226552 | 2.1416389  | 0 | NA | CNTN3     | CNTN3     |
| COX7A1    | 3.6220653  | 0.49840726 | 0 | NA | COX7A1    | COX7A1    |
| CPNE8     | -7.9019211 | 5.45090012 | 0 | NA | CPNE8     | CPNE8     |
| CTNNBL1   | -5.1701204 | 2.60508807 | 0 | NA | CTNNBL1   | CTNNBL1   |
| CTXN3     | -3.1547723 | 2.02249669 | 0 | NA | CTXN3     | CTXN3     |
| CXorf1    | 3.5295083  | 0.5214482  | 0 | NA | CXorf1    | CXorf1    |
| DACH2     | 5.3983733  | 0.39389626 | 0 | NA | DACH2     | DACH2     |
| DACT1     | 3.7612088  | 0.6514341  | 0 | NA | DACT1     | DACT1     |
| DGKI      | 2.8821568  | 0.44509385 | 0 | NA | DGKI      | DGKI      |
| DLG1      | 3.1684757  | 0.60089689 | 0 | NA | DLG1      | DLG1      |
| DOK5      | 3.4689382  | 0.68277451 | 0 | NA | DOK5      | DOK5      |
| DYRK2     | 2.3302515  | 0.68671835 | 0 | NA | DYRK2     | DYRK2     |
| EPHA4     | -2.3288721 | 1.52144273 | 0 | NA | EPHA4     | EPHA4     |
| FAM19A5   | -2.2537914 | 1.36434919 | 0 | NA | FAM19A5   | FAM19A5   |
| FAM5B     | -2.7524322 | 1.60087371 | 0 | NA | FAM5B     | FAM5B     |
| FGF12     | -3.1985688 | 1.60028385 | 0 | NA | FGF12     | FGF12     |
| FGF14     | -4.161336  | 1.89013512 | 0 | NA | FGF14     | FGF14     |
| FLJ43390  | -9.7499031 | 5.56194442 | 0 | NA | FLJ43390  | FLJ43390  |
| FLRT3     | -6.0329061 | 2.31581298 | 0 | NA | FLRT3     | FLRT3     |
| FRMPD4    | 2.6700364  | 0.72369361 | 0 | NA | FRMPD4    | FRMPD4    |
| GABRA1    | -2.4861275 | 1.5458172  | 0 | NA | GABRA1    | GABRA1    |
| GABRA5    | 4.1635031  | 0.57212962 | 0 | NA | GABRA5    | GABRA5    |
| GABRG2    | -2.500529  | 1.35616898 | 0 | NA | GABRG2    | GABRG2    |
| GAS1      | -2.8207017 | 1.43925682 | 0 | NA | GAS1      | GAS1      |
| GOLSYN    | 3.3184939  | 0.65282491 | 0 | NA | GOLSYN    | GOLSYN    |
| GRB14     | 2.5728727  | 0.49303609 | 0 | NA | GRB14     | GRB14     |
| H2AFY2    | -2.909317  | 1.40106706 | 0 | NA | H2AFY2    | H2AFY2    |
| HLF       | 4.0234794  | 0.4754812  | 0 | NA | HLF       | HLF       |
| ID2       | 3.8786506  | 0.44944894 | 0 | NA | ID2       | ID2       |
| IGFBP4    | 2.3828134  | 0.68418134 | 0 | NA | IGFBP4    | IGFBP4    |
| IGFBP5    | -2.834741  | 1.61843461 | 0 | NA | IGFBP5    | IGFBP5    |
| IGSF11    | -7.5561874 | 3.09731621 | 0 | NA | IGSF11    | IGSF11    |
| KIAA0182  | 2.8095351  | 0.6575132  | 0 | NA | KIAA0182  | KIAA0182  |
| KLF6      | -2.7404503 | 1.42932138 | 0 | NA | KLF6      | KLF6      |
| LGALS8    | 2.2259948  | 0.72480252 | 0 | NA | LGALS8    | LGALS8    |
| LHFP      | 3.3336246  | 0.60532507 | 0 | NA | LHFP      | LHFP      |
| LMO3      | -2.4423344 | 1.621965   | 0 | NA | LMO3      | LMO3      |
| LMO4      | -5.4333042 | 2.09762329 | 0 | NA | LMO4      | LMO4      |
| LOC150568 | -4.5808282 | 2.16132196 | 0 | NA | LOC150568 | LOC150568 |
| LOC283392 | 3.2109194  | 0.58737246 | 0 | NA | LOC283392 | LOC283392 |
| LOC645323 | 2.2641538  | 0.74917028 | 0 | NA | LOC645323 | LOC645323 |
| LOC653786 | 2.4826133  | 0.66960833 | 0 | NA | LOC653786 | LOC653786 |
| LRRTM4    | 5.9239675  | 0.23561301 | 0 | NA | LRRTM4    | LRRTM4    |
| MAMLD1    | -2.732106  | 1.53315954 | 0 | NA | MAMLD1    | MAMLD1    |
| MARCH3    | -5.561013  | 1.98423491 | 0 | NA | MARCH3    | MARCH3    |
| MAST4     | -4.5965819 | 1.89897414 | 0 | NA | MAST4     | MAST4     |
| MC4R      | -2.7448307 | 2.07739068 | 0 | NA | MC4R      | MC4R      |
| MDGA1     | -2.3368477 | 1.47049165 | 0 | NA | MDGA1     | MDGA1     |
| MID1      | 3.3365625  | 0.56004233 | 0 | NA | MID1      | MID1      |
| MOSC1     | -2.4501897 | 1.4052336  | 0 | NA | MOSC1     | MOSC1     |
| AADAT     | -2.5028615 | 1.32458137 | 0 | NA | NA        | AADAT     |
| ABCA1     | -3.0361926 | 1.58268171 | 0 | NA | NA        | ABCA1     |
| ACTN2     | 5.7230026  | 0.4636697  | 0 | NA | NA        | ACTN2     |
| ACVR1C    | 4.1708629  | 0.43979572 | 0 | NA | NA        | ACVR1C    |
| ADAMTS3   | -2.4132743 | 1.48483016 | 0 | NA | NA        | ADAMTS3   |
| ADCY8     | -7.3811571 | 3.68678064 | 0 | NA | NA        | ADCY8     |
| ADI1      | 2.2650305  | 0.75310026 | 0 | NA | NA        | ADI1      |
| AK3L1     | -2.7061578 | 1.72460433 | 0 | NA | NA        | AK3L1     |

|           |            |            |   |    |    |           |
|-----------|------------|------------|---|----|----|-----------|
| ANKH      | 2.6719111  | 0.68214739 | 0 | NA | NA | ANKH      |
| ANKRD57   | 3.0675827  | 0.64815372 | 0 | NA | NA | ANKRD57   |
| ANKS1B    | 5.4887345  | 0.46381882 | 0 | NA | NA | ANKS1B    |
| ANO3      | 2.3646069  | 0.48056189 | 0 | NA | NA | ANO3      |
| ANO4      | -3.3417516 | 1.52520784 | 0 | NA | NA | ANO4      |
| ANTXR2    | 3.9176954  | 0.58369719 | 0 | NA | NA | ANTXR2    |
| ARHGAP6   | -3.195736  | 1.87980994 | 0 | NA | NA | ARHGAP6   |
| ARHGEF6   | 2.8277758  | 0.64287333 | 0 | NA | NA | ARHGEF6   |
| ARL4A     | 2.511116   | 0.63345231 | 0 | NA | NA | ARL4A     |
| ASAH1     | 2.5440324  | 0.73396012 | 0 | NA | NA | ASAH1     |
| ASCL1     | 4.3720168  | 0.50310044 | 0 | NA | NA | ASCL1     |
| ATP8A2    | -2.771165  | 1.51469201 | 0 | NA | NA | ATP8A2    |
| B3GALT2   | 3.1860665  | 0.64355277 | 0 | NA | NA | B3GALT2   |
| B3GAT2    | -2.2564059 | 1.50607282 | 0 | NA | NA | B3GAT2    |
| B3GNT2    | -2.2363781 | 1.33150078 | 0 | NA | NA | B3GNT2    |
| BAMBI     | -2.5486832 | 1.74619574 | 0 | NA | NA | BAMBI     |
| BARD1     | 3.8839376  | 0.39442453 | 0 | NA | NA | BARD1     |
| BATF3     | 2.2609024  | 0.66619292 | 0 | NA | NA | BATF3     |
| BDNF      | -6.0284835 | 4.73059426 | 0 | NA | NA | BDNF      |
| BEND6     | 2.719765   | 0.6260379  | 0 | NA | NA | BEND6     |
| BHLHE40   | 2.4061711  | 0.67549028 | 0 | NA | NA | BHLHE40   |
| C14orf132 | 4.9873905  | 0.49423025 | 0 | NA | NA | C14orf132 |
| C16orf61  | -4.4408933 | 1.96458039 | 0 | NA | NA | C16orf61  |
| C18orf1   | 2.6272125  | 0.72658286 | 0 | NA | NA | C18orf1   |
| C1orf198  | -2.5560951 | 1.44208311 | 0 | NA | NA | C1orf198  |
| C3orf59   | -3.6667364 | 1.71843955 | 0 | NA | NA | C3orf59   |
| C6orf141  | -2.511954  | 1.54599037 | 0 | NA | NA | C6orf141  |
| CALB1     | -10.470768 | 11.6676061 | 0 | NA | NA | CALB1     |
| CAP2      | 2.3484789  | 0.74445997 | 0 | NA | NA | CAP2      |
| CBLN2     | -14.554868 | 11.2565275 | 0 | NA | NA | CBLN2     |
| CCDC109B  | 3.0258479  | 0.54338818 | 0 | NA | NA | CCDC109B  |
| CDCA7     | 2.3297026  | 0.73081932 | 0 | NA | NA | CDCA7     |
| CDCA7L    | -3.204917  | 1.82154463 | 0 | NA | NA | CDCA7L    |
| CDH3      | 2.8363774  | 0.6615742  | 0 | NA | NA | CDH3      |
| CENPF     | -2.9824191 | 1.57276807 | 0 | NA | NA | CENPF     |
| CHRDL1    | -4.5280955 | 2.8838507  | 0 | NA | NA | CHRDL1    |
| CHST8     | 2.9652964  | 0.48824292 | 0 | NA | NA | CHST8     |
| CLDN1     | -6.6031156 | 2.44678317 | 0 | NA | NA | CLDN1     |
| CNIH3     | -3.9901337 | 1.71872752 | 0 | NA | NA | CNIH3     |
| CNTNAP2   | -5.1222137 | 3.34073761 | 0 | NA | NA | CNTNAP2   |
| COL12A1   | -2.5600556 | 1.45817607 | 0 | NA | NA | COL12A1   |
| COMMD2    | 2.6738365  | 0.72015488 | 0 | NA | NA | COMMD2    |
| CRISPLD1  | -2.8583041 | 1.65098592 | 0 | NA | NA | CRISPLD1  |
| CSRP2     | -5.7836768 | 2.30538505 | 0 | NA | NA | CSRP2     |
| CUX1      | 8.0750155  | 0.33967862 | 0 | NA | NA | CUX1      |
| CXCR4     | 2.4724394  | 0.73913062 | 0 | NA | NA | CXCR4     |
| CXXC4     | -3.9002226 | 1.68344979 | 0 | NA | NA | CXXC4     |
| CXXC5     | -5.7185821 | 2.53493779 | 0 | NA | NA | CXXC5     |
| CYP26A1   | -2.9104637 | 2.07047558 | 0 | NA | NA | CYP26A1   |
| DERA      | -3.2478245 | 1.90395366 | 0 | NA | NA | DERA      |
| DNER      | 2.2646872  | 0.67573729 | 0 | NA | NA | DNER      |
| DUSP10    | -4.7462373 | 1.89223447 | 0 | NA | NA | DUSP10    |
| DUSP4     | -4.5331275 | 2.38044825 | 0 | NA | NA | DUSP4     |
| EDIL3     | 2.4718718  | 0.71487974 | 0 | NA | NA | EDIL3     |
| EFR3A     | -2.5473489 | 1.48864717 | 0 | NA | NA | EFR3A     |
| EMX2      | -3.67376   | 2.37966598 | 0 | NA | NA | EMX2      |
| EPCAM     | 3.3607583  | 0.567492   | 0 | NA | NA | EPCAM     |
| EPHA7     | 2.3254158  | 0.64339145 | 0 | NA | NA | EPHA7     |

|          |            |            |   |    |    |          |
|----------|------------|------------|---|----|----|----------|
| EPS15    | -2.380353  | 1.48687855 | 0 | NA | NA | EPS15    |
| F3       | -2.1747337 | 1.73215267 | 0 | NA | NA | F3       |
| FAM59A   | -2.4934649 | 1.78462466 | 0 | NA | NA | FAM59A   |
| FERMT2   | 4.2632045  | 0.48073451 | 0 | NA | NA | FERMT2   |
| FGFBP3   | 5.9094274  | 0.39665838 | 0 | NA | NA | FGFBP3   |
| FHDC1    | -6.7100988 | 2.52361319 | 0 | NA | NA | FHDC1    |
| FJX1     | 5.5721969  | 0.39617966 | 0 | NA | NA | FJX1     |
| FLJ11235 | 2.3242112  | 0.67035538 | 0 | NA | NA | FLJ11235 |
| FOXP1    | 2.5735375  | 0.71489822 | 0 | NA | NA | FOXP1    |
| FRZB     | 2.8764855  | 0.66639767 | 0 | NA | NA | FRZB     |
| FSTL5    | -9.134059  | 5.14415268 | 0 | NA | NA | FSTL5    |
| FZD4     | -2.5504763 | 1.47882771 | 0 | NA | NA | FZD4     |
| GAB1     | 2.4348477  | 0.72772467 | 0 | NA | NA | GAB1     |
| GABRG1   | 3.8878003  | 0.50753413 | 0 | NA | NA | GABRG1   |
| GALNT2   | -4.2925877 | 1.95474348 | 0 | NA | NA | GALNT2   |
| GCG      | -4.5083529 | 2.3913353  | 0 | NA | NA | GCG      |
| GHR      | 2.8771158  | 0.43728712 | 0 | NA | NA | GHR      |
| GLT25D2  | -3.7023891 | 1.66361917 | 0 | NA | NA | GLT25D2  |
| GPHN     | 2.5740778  | 0.72677534 | 0 | NA | NA | GPHN     |
| GPR22    | 3.3248308  | 0.47835698 | 0 | NA | NA | GPR22    |
| GPR37    | -2.8484793 | 1.64943831 | 0 | NA | NA | GPR37    |
| GPR88    | -3.4255545 | 2.18844425 | 0 | NA | NA | GPR88    |
| GPSM2    | -3.4162766 | 2.69405811 | 0 | NA | NA | GPSM2    |
| GREM1    | -2.8864642 | 2.73409001 | 0 | NA | NA | GREM1    |
| GREM2    | -4.9255321 | 4.01956006 | 0 | NA | NA | GREM2    |
| HCRTR2   | -2.6419059 | 1.7646649  | 0 | NA | NA | HCRTR2   |
| HEY1     | -3.7913367 | 1.48994671 | 0 | NA | NA | HEY1     |
| HIP1R    | -2.1829824 | 1.28957466 | 0 | NA | NA | HIP1R    |
| HS3ST1   | -2.2006599 | 1.42280822 | 0 | NA | NA | HS3ST1   |
| HS6ST3   | -3.6617101 | 2.5215554  | 0 | NA | NA | HS6ST3   |
| HSPA12A  | -4.2211371 | 2.06573928 | 0 | NA | NA | HSPA12A  |
| HTR1A    | 3.8667755  | 0.55382899 | 0 | NA | NA | HTR1A    |
| HUNK     | -3.5936681 | 1.62480292 | 0 | NA | NA | HUNK     |
| IL7      | -4.0113273 | 3.62954247 | 0 | NA | NA | IL7      |
| INTS12   | -2.4877879 | 1.36118535 | 0 | NA | NA | INTS12   |
| IRS2     | -3.4481015 | 1.49754195 | 0 | NA | NA | IRS2     |
| ITGA2    | 2.7273643  | 0.64873872 | 0 | NA | NA | ITGA2    |
| ITGA9    | -2.8155154 | 1.48817905 | 0 | NA | NA | ITGA9    |
| ITGAV    | 2.574707   | 0.67811483 | 0 | NA | NA | ITGAV    |
| ITPR1    | 3.6500924  | 0.6397888  | 0 | NA | NA | ITPR1    |
| JMJD1C   | 2.5771635  | 0.67697228 | 0 | NA | NA | JMJD1C   |
| JPH1     | -3.2960068 | 1.56100122 | 0 | NA | NA | JPH1     |
| KCNA5    | -5.2899544 | 2.51664648 | 0 | NA | NA | KCNA5    |
| KCNC2    | -2.9617191 | 1.43705499 | 0 | NA | NA | KCNC2    |
| KCNJ6    | -5.6306064 | 2.58105401 | 0 | NA | NA | KCNJ6    |
| KCNK9    | -3.5810556 | 1.81798244 | 0 | NA | NA | KCNK9    |
| KCNT2    | 2.3088159  | 0.53576416 | 0 | NA | NA | KCNT2    |
| KIAA0319 | 3.0140926  | 0.65502347 | 0 | NA | NA | KIAA0319 |
| KIAA0895 | 4.4775793  | 0.41370822 | 0 | NA | NA | KIAA0895 |
| KIAA1239 | 3.8815334  | 0.58276574 | 0 | NA | NA | KIAA1239 |
| KIAA1377 | -5.0111275 | 2.24041945 | 0 | NA | NA | KIAA1377 |
| KIAA1804 | 3.1060298  | 0.62349667 | 0 | NA | NA | KIAA1804 |
| KIT      | -3.1769796 | 1.63754001 | 0 | NA | NA | KIT      |
| KITLG    | 2.7996099  | 0.49657375 | 0 | NA | NA | KITLG    |
| KL       | 2.5219389  | 0.67779547 | 0 | NA | NA | KL       |
| KLHL32   | 5.6726516  | 0.24577443 | 0 | NA | NA | KLHL32   |
| KLHL8    | 3.0656515  | 0.69557702 | 0 | NA | NA | KLHL8    |
| KRT31    | -3.8344871 | 2.18590383 | 0 | NA | NA | KRT31    |

|           |            |            |   |    |    |           |
|-----------|------------|------------|---|----|----|-----------|
| LDB2      | -2.8931194 | 1.4399603  | 0 | NA | NA | LDB2      |
| LDLRAD3   | 4.0334391  | 0.51008571 | 0 | NA | NA | LDLRAD3   |
| LHFPL2    | -4.0089999 | 1.78865557 | 0 | NA | NA | LHFPL2    |
| LN2       | -2.7594468 | 1.56511014 | 0 | NA | NA | LN2       |
| LOC286002 | 6.6399202  | 0.37730405 | 0 | NA | NA | LOC286002 |
| LOX       | 4.6566289  | 0.52134261 | 0 | NA | NA | LOX       |
| LPL       | 2.7815804  | 0.71377351 | 0 | NA | NA | LPL       |
| LRRC3B    | -4.8019253 | 1.97409064 | 0 | NA | NA | LRRC3B    |
| LRRTM2    | -2.4679681 | 1.4276446  | 0 | NA | NA | LRRTM2    |
| LUZP2     | 2.5089308  | 0.46101732 | 0 | NA | NA | LUZP2     |
| MAL2      | -2.6502091 | 1.76772617 | 0 | NA | NA | MAL2      |
| MAP3K5    | -6.2555867 | 3.27948624 | 0 | NA | NA | MAP3K5    |
| MCHR2     | -3.564827  | 1.90786707 | 0 | NA | NA | MCHR2     |
| MCTP1     | 3.6104371  | 0.58045841 | 0 | NA | NA | MCTP1     |
| ME3       | -2.3898726 | 1.31149488 | 0 | NA | NA | ME3       |
| MEGF10    | -7.2306862 | 3.23291631 | 0 | NA | NA | MEGF10    |
| MEGF11    | -2.9538663 | 1.677664   | 0 | NA | NA | MEGF11    |
| MET       | 3.6942663  | 0.56200753 | 0 | NA | NA | MET       |
| MIPEP     | -6.0186078 | 2.26883941 | 0 | NA | NA | MIPEP     |
| MOCS2     | 2.6924114  | 0.68164569 | 0 | NA | NA | MOCS2     |
| MPP6      | 2.8271169  | 0.45577482 | 0 | NA | NA | MPP6      |
| MRAP2     | 2.3949268  | 0.51337438 | 0 | NA | NA | MRAP2     |
| MTFR1     | 2.241794   | 0.74725754 | 0 | NA | NA | MTFR1     |
| MYO16     | -3.0542861 | 1.60213646 | 0 | NA | NA | MYO16     |
| MYO1E     | 2.4481187  | 0.67850105 | 0 | NA | NA | MYO1E     |
| NCOA2     | 2.3244361  | 0.65543156 | 0 | NA | NA | NCOA2     |
| NEBL      | -3.959623  | 1.81477552 | 0 | NA | NA | NEBL      |
| NEDD9     | -2.4947402 | 1.5534365  | 0 | NA | NA | NEDD9     |
| NEFL      | 6.1790036  | 0.31463525 | 0 | NA | NA | NEFL      |
| NEUROD1   | -7.5610329 | 4.91363672 | 0 | NA | NA | NEUROD1   |
| NFE2L3    | 3.2905816  | 0.45771202 | 0 | NA | NA | NFE2L3    |
| NME5      | -2.2837135 | 1.57292326 | 0 | NA | NA | NME5      |
| NPAS2     | 2.4130014  | 0.7114197  | 0 | NA | NA | NPAS2     |
| NPY       | 10.487701  | 0.15260943 | 0 | NA | NA | NPY       |
| NPY1R     | -2.8091789 | 1.55164331 | 0 | NA | NA | NPY1R     |
| NR2F1     | 4.5333847  | 0.4904898  | 0 | NA | NA | NR2F1     |
| NRIP1     | -3.2856362 | 1.71512376 | 0 | NA | NA | NRIP1     |
| NRN1      | 2.645197   | 0.61308738 | 0 | NA | NA | NRN1      |
| NTN4      | -4.3353016 | 2.12969222 | 0 | NA | NA | NTN4      |
| NTNG1     | 2.5601591  | 0.6424647  | 0 | NA | NA | NTNG1     |
| NUP93     | -3.4552735 | 1.54554115 | 0 | NA | NA | NUP93     |
| OSBPL6    | 2.5945569  | 0.64613791 | 0 | NA | NA | OSBPL6    |
| OTOR      | 3.3941304  | 0.32209121 | 0 | NA | NA | OTOR      |
| P2RY12    | 2.5446371  | 0.62162186 | 0 | NA | NA | P2RY12    |
| PACSIN2   | -2.7839704 | 1.44877693 | 0 | NA | NA | PACSIN2   |
| PAICS     | 3.8589303  | 0.6145106  | 0 | NA | NA | PAICS     |
| PAK7      | 4.4807926  | 0.58162497 | 0 | NA | NA | PAK7      |
| PALMD     | -3.1556924 | 1.82573813 | 0 | NA | NA | PALMD     |
| PAPPA2    | 3.3547903  | 0.67821402 | 0 | NA | NA | PAPPA2    |
| PCBD1     | -2.4006729 | 1.43434157 | 0 | NA | NA | PCBD1     |
| PCOLCE2   | 2.5204469  | 0.58040551 | 0 | NA | NA | PCOLCE2   |
| PCSK2     | 11.205976  | 0.12589846 | 0 | NA | NA | PCSK2     |
| PDE8B     | -2.9336571 | 1.67372112 | 0 | NA | NA | PDE8B     |
| PDZRN3    | 2.3995817  | 0.66270499 | 0 | NA | NA | PDZRN3    |
| PENK      | -6.7368517 | 6.43723769 | 0 | NA | NA | PENK      |
| PGM1      | -2.8866915 | 1.47795452 | 0 | NA | NA | PGM1      |
| PKP4      | -2.4639251 | 1.3398196  | 0 | NA | NA | PKP4      |
| PLCXD3    | 4.2669402  | 0.47628416 | 0 | NA | NA | PLCXD3    |

|           |            |            |   |    |    |           |
|-----------|------------|------------|---|----|----|-----------|
| PLEKHG1   | -3.4388593 | 2.35048104 | 0 | NA | NA | PLEKHG1   |
| POPDC3    | -4.034346  | 2.24011236 | 0 | NA | NA | POPDC3    |
| POU6F2    | -2.6805439 | 1.63663371 | 0 | NA | NA | POU6F2    |
| PPEF1     | 8.0271043  | 0.3765052  | 0 | NA | NA | PPEF1     |
| PROK2     | 3.9923299  | 0.40336252 | 0 | NA | NA | PROK2     |
| PRSS23    | -8.5327816 | 3.48366176 | 0 | NA | NA | PRSS23    |
| PRUNE2    | -2.1695295 | 1.38494176 | 0 | NA | NA | PRUNE2    |
| PTDSS1    | 3.5101653  | 0.65010501 | 0 | NA | NA | PTDSS1    |
| PTGFR     | -4.2996081 | 3.03066476 | 0 | NA | NA | PTGFR     |
| PTPN13    | 3.4056784  | 0.52764387 | 0 | NA | NA | PTPN13    |
| PTPN2     | 2.2949353  | 0.72235209 | 0 | NA | NA | PTPN2     |
| PTPRT     | -2.748046  | 1.71787085 | 0 | NA | NA | PTPRT     |
| PTX3      | -5.0063375 | 2.69234918 | 0 | NA | NA | PTX3      |
| RASGRP1   | 8.1145198  | 0.18252844 | 0 | NA | NA | RASGRP1   |
| RASL11B   | 4.6466211  | 0.54763951 | 0 | NA | NA | RASL11B   |
| RBP1      | -2.2620478 | 1.66082427 | 0 | NA | NA | RBP1      |
| RCAN1     | -3.188018  | 1.56161412 | 0 | NA | NA | RCAN1     |
| RCAN2     | -6.3698221 | 4.29708113 | 0 | NA | NA | RCAN2     |
| RFK       | -3.0766184 | 1.42806894 | 0 | NA | NA | RFK       |
| RFTN1     | -2.4595346 | 1.37948102 | 0 | NA | NA | RFTN1     |
| RGS8      | -2.4556735 | 1.75033938 | 0 | NA | NA | RGS8      |
| RGS9      | -2.3931161 | 1.54817406 | 0 | NA | NA | RGS9      |
| RPL23AP32 | 2.2281744  | 0.68807363 | 0 | NA | NA | RPL23AP32 |
| RPRML     | 3.4553787  | 0.39643637 | 0 | NA | NA | RPRML     |
| RRAS2     | -2.2138059 | 1.43616073 | 0 | NA | NA | RRAS2     |
| RXFP1     | -9.3099821 | 9.18590416 | 0 | NA | NA | RXFP1     |
| RXRG      | -5.5586275 | 2.9990711  | 0 | NA | NA | RXRG      |
| RYR3      | 5.4519481  | 0.38078123 | 0 | NA | NA | RYR3      |
| SAMD13    | -3.0569876 | 1.73761783 | 0 | NA | NA | SAMD13    |
| SAV1      | 4.2713176  | 0.49855907 | 0 | NA | NA | SAV1      |
| SDC2      | 2.240968   | 0.57465879 | 0 | NA | NA | SDC2      |
| SEMA3E    | -2.3056371 | 1.63520145 | 0 | NA | NA | SEMA3E    |
| SERPINI1  | 3.7436343  | 0.60735495 | 0 | NA | NA | SERPINI1  |
| SEZ6L     | 2.383783   | 0.70083586 | 0 | NA | NA | SEZ6L     |
| SGCG      | -3.5579458 | 2.88288651 | 0 | NA | NA | SGCG      |
| SGEF      | 3.0105396  | 0.51600388 | 0 | NA | NA | SGEF      |
| SGK1      | 4.5344644  | 0.54497708 | 0 | NA | NA | SGK1      |
| SH3D19    | -2.1801666 | 1.33741731 | 0 | NA | NA | SH3D19    |
| SHISA2    | 5.6562868  | 0.33524399 | 0 | NA | NA | SHISA2    |
| SLC12A2   | -2.2112538 | 1.5342079  | 0 | NA | NA | SLC12A2   |
| SLC17A7   | 3.8280472  | 0.65556488 | 0 | NA | NA | SLC17A7   |
| SLC35F2   | -2.9960979 | 1.96965228 | 0 | NA | NA | SLC35F2   |
| SLITRK3   | -4.2346195 | 2.044461   | 0 | NA | NA | SLITRK3   |
| SLITRK4   | 2.2845762  | 0.74566532 | 0 | NA | NA | SLITRK4   |
| SMC4      | 3.2304147  | 0.66233649 | 0 | NA | NA | SMC4      |
| SNCAIP    | -2.3999304 | 1.44456808 | 0 | NA | NA | SNCAIP    |
| SOCS2     | -2.3828863 | 1.62618978 | 0 | NA | NA | SOCS2     |
| SOX9      | 12.91514   | 0.11641769 | 0 | NA | NA | SOX9      |
| SPIRE1    | 3.7605242  | 0.60874536 | 0 | NA | NA | SPIRE1    |
| SRI       | -2.2418818 | 1.30176061 | 0 | NA | NA | SRI       |
| SSTR1     | 2.2225815  | 0.45025199 | 0 | NA | NA | SSTR1     |
| ST3GAL1   | 2.3076774  | 0.65009901 | 0 | NA | NA | ST3GAL1   |
| ST6GAL2   | 4.5318538  | 0.44398221 | 0 | NA | NA | ST6GAL2   |
| STARD4    | 3.0072284  | 0.63499894 | 0 | NA | NA | STARD4    |
| STK31     | 3.157706   | 0.29964372 | 0 | NA | NA | STK31     |
| SULF1     | -4.571398  | 2.76779119 | 0 | NA | NA | SULF1     |
| SVIP      | 3.1539867  | 0.63591265 | 0 | NA | NA | SVIP      |
| SYNPR     | 2.2112118  | 0.6402151  | 0 | NA | NA | SYNPR     |

|          |            |            |   |    |          |          |
|----------|------------|------------|---|----|----------|----------|
| TACR2    | 2.2351101  | 0.65506084 | 0 | NA | NA       | TACR2    |
| TAL2     | -2.8474592 | 1.98116717 | 0 | NA | NA       | TAL2     |
| TBC1D8   | 3.2520082  | 0.56460283 | 0 | NA | NA       | TBC1D8   |
| TCF7L2   | -2.7195924 | 1.46882282 | 0 | NA | NA       | TCF7L2   |
| TDRD7    | 2.4033651  | 0.71213719 | 0 | NA | NA       | TDRD7    |
| TGFA     | 3.641964   | 0.59550569 | 0 | NA | NA       | TGFA     |
| TGFB2    | 5.2878672  | 0.38054757 | 0 | NA | NA       | TGFB2    |
| TGFBR1   | 2.4199176  | 0.6526334  | 0 | NA | NA       | TGFBR1   |
| THSD7A   | 3.3056219  | 0.55085256 | 0 | NA | NA       | THSD7A   |
| TLK1     | 3.19175    | 0.6193214  | 0 | NA | NA       | TLK1     |
| TMEM200A | 4.5987098  | 0.48562263 | 0 | NA | NA       | TMEM200A |
| TMEM35   | -2.2798528 | 1.40446853 | 0 | NA | NA       | TMEM35   |
| TNFRSF21 | -2.2771288 | 1.33797149 | 0 | NA | NA       | TNFRSF21 |
| TNKS2    | 2.4188874  | 0.6724906  | 0 | NA | NA       | TNKS2    |
| TP53I3   | -4.5234967 | 2.3275304  | 0 | NA | NA       | TP53I3   |
| TRPC4    | 5.6127943  | 0.39063655 | 0 | NA | NA       | TRPC4    |
| TRPC7    | 3.4270364  | 0.44069231 | 0 | NA | NA       | TRPC7    |
| TSHZ1    | -2.7662182 | 1.5240847  | 0 | NA | NA       | TSHZ1    |
| TSHZ3    | -4.8185133 | 2.42675149 | 0 | NA | NA       | TSHZ3    |
| UFM1     | 2.5808817  | 0.67122313 | 0 | NA | NA       | UFM1     |
| UNC13C   | 5.2100561  | 0.37864663 | 0 | NA | NA       | UNC13C   |
| USP46    | 2.7529312  | 0.69716762 | 0 | NA | NA       | USP46    |
| UST      | -2.3511955 | 1.63237533 | 0 | NA | NA       | UST      |
| WIF1     | 2.9832351  | 0.33811108 | 0 | NA | NA       | WIF1     |
| WNT7B    | 3.4683119  | 0.48789458 | 0 | NA | NA       | WNT7B    |
| XK       | 2.2480153  | 0.63144829 | 0 | NA | NA       | XK       |
| ZNF114   | -3.8851986 | 2.8202289  | 0 | NA | NA       | ZNF114   |
| ZNF385B  | 3.1447634  | 0.46473021 | 0 | NA | NA       | ZNF385B  |
| ZNF503   | 2.7163132  | 0.66857216 | 0 | NA | NA       | ZNF503   |
| ZNF618   | 2.4840875  | 0.73010905 | 0 | NA | NA       | ZNF618   |
| NDP      | -4.9907327 | 3.07052035 | 0 | NA | NDP      | NDP      |
| NOG      | -3.1842631 | 2.05302024 | 0 | NA | NOG      | NOG      |
| NR3C1    | 3.9886444  | 0.55590161 | 0 | NA | NR3C1    | NR3C1    |
| NR3C2    | 6.2948111  | 0.35436521 | 0 | NA | NR3C2    | NR3C2    |
| NR4A2    | 5.3728796  | 0.31034033 | 0 | NA | NR4A2    | NR4A2    |
| NTNG2    | 5.0387291  | 0.27228346 | 0 | NA | NTNG2    | NTNG2    |
| NXPH3    | 3.2378358  | 0.63766383 | 0 | NA | NXPH3    | NXPH3    |
| ODZ4     | 2.4831271  | 0.71491135 | 0 | NA | ODZ4     | ODZ4     |
| OLFM3    | -2.3427178 | 1.60992788 | 0 | NA | OLFM3    | OLFM3    |
| PBX3     | 2.6304097  | 0.71030199 | 0 | NA | PBX3     | PBX3     |
| PCDH17   | -5.0671224 | 2.34152922 | 0 | NA | PCDH17   | PCDH17   |
| PCDH18   | -2.4106968 | 1.50798322 | 0 | NA | PCDH18   | PCDH18   |
| PCSK9    | 2.8585448  | 0.66795293 | 0 | NA | PCSK9    | PCSK9    |
| PDE4DIP  | 2.650362   | 0.69291976 | 0 | NA | PDE4DIP  | PDE4DIP  |
| PDZRN4   | -5.4476486 | 2.63707924 | 0 | NA | PDZRN4   | PDZRN4   |
| PHLDA1   | -4.0501691 | 1.65922624 | 0 | NA | PHLDA1   | PHLDA1   |
| PIK3AP1  | 2.7624911  | 0.64434479 | 0 | NA | PIK3AP1  | PIK3AP1  |
| PPARGC1A | 2.5259817  | 0.69605157 | 0 | NA | PPARGC1A | PPARGC1A |
| PSD2     | -2.1802477 | 1.30380301 | 0 | NA | PSD2     | PSD2     |
| PTER     | -3.937988  | 2.21395294 | 0 | NA | PTER     | PTER     |
| PTPRK    | 4.7632103  | 0.3977537  | 0 | NA | PTPRK    | PTPRK    |
| QDPR     | -2.1979566 | 1.33072736 | 0 | NA | QDPR     | QDPR     |
| RAB7L1   | 3.8609759  | 0.56498331 | 0 | NA | RAB7L1   | RAB7L1   |
| RGS20    | 2.36348    | 0.71130303 | 0 | NA | RGS20    | RGS20    |
| RNF182   | 4.7106408  | 0.47962861 | 0 | NA | RNF182   | RNF182   |
| ROBO2    | 5.3895655  | 0.46474463 | 0 | NA | ROBO2    | ROBO2    |
| RPRM     | -3.0311581 | 2.03229418 | 0 | NA | RPRM     | RPRM     |
| SFRP1    | -3.1715505 | 1.60973547 | 0 | NA | SFRP1    | SFRP1    |



|           |            |            |            |    |         |           |
|-----------|------------|------------|------------|----|---------|-----------|
| SFRP2     | -2.9745118 | 1.69062342 | 0          | NA | SFRP2   | SFRP2     |
| SLC6A15   | 2.7910928  | 0.67529137 | 0          | NA | SLC6A15 | SLC6A15   |
| SLCO3A1   | -2.3528977 | 1.73020418 | 0          | NA | SLCO3A1 | SLCO3A1   |
| SLIT2     | -3.0879381 | 1.56586266 | 0          | NA | SLIT2   | SLIT2     |
| SORCS1    | 4.3988439  | 0.48451882 | 0          | NA | SORCS1  | SORCS1    |
| SPON1     | 5.0932677  | 0.30520412 | 0          | NA | SPON1   | SPON1     |
| ST8SIA3   | -2.4241874 | 1.47965344 | 0          | NA | ST8SIA3 | ST8SIA3   |
| STXBP6    | -7.5596973 | 3.29939452 | 0          | NA | STXBP6  | STXBP6    |
| SULF2     | -4.7353515 | 2.57250946 | 0          | NA | SULF2   | SULF2     |
| SYNE1     | 2.7432808  | 0.71460998 | 0          | NA | SYNE1   | SYNE1     |
| SYNM      | -3.2827036 | 1.63034073 | 0          | NA | SYNM    | SYNM      |
| TLE1      | 9.2333799  | 0.33331922 | 0          | NA | TLE1    | TLE1      |
| TMCC2     | 2.363984   | 0.72802771 | 0          | NA | TMCC2   | TMCC2     |
| TOX       | -6.2470255 | 3.16050207 | 0          | NA | TOX     | TOX       |
| TPBG      | -2.3870222 | 1.57377889 | 0          | NA | TPBG    | TPBG      |
| TRH       | -4.3485877 | 1.92544255 | 0          | NA | TRH     | TRH       |
| WBSCR17   | -3.4505242 | 1.54274478 | 0          | NA | WBSCR17 | WBSCR17   |
| WNT11     | -2.185204  | 1.57874503 | 0          | NA | WNT11   | WNT11     |
| ZNF238    | 2.8390867  | 0.596913   | 0          | NA | ZNF238  | ZNF238    |
| ZNF423    | -6.9022481 | 4.59746511 | 0          | NA | ZNF423  | ZNF423    |
| C5orf4    | 2.0449505  | 0.75038304 | 0.11329523 | NA | C5orf4  | C5orf4    |
| DPF3      | -1.9948572 | 1.32280327 | 0.11329523 | NA | DPF3    | DPF3      |
| EIF3E     | 2.1041583  | 0.79564492 | 0.11329523 | NA | EIF3E   | EIF3E     |
| GGTA1     | -2.1053034 | 1.54639322 | 0.11329523 | NA | GGTA1   | GGTA1     |
| GOLGA7B   | -2.1550231 | 1.44318056 | 0.11329523 | NA | GOLGA7B | GOLGA7B   |
| GPAM      | 2.140471   | 0.68699697 | 0.11329523 | NA | GPAM    | GPAM      |
| GRIK2     | -2.1000341 | 1.32784063 | 0.11329523 | NA | GRIK2   | GRIK2     |
| GRM7      | -1.9945815 | 1.33335681 | 0.11329523 | NA | GRM7    | GRM7      |
| HSPB3     | -2.111997  | 1.51116191 | 0.11329523 | NA | HSPB3   | HSPB3     |
| HTR7      | 2.0742972  | 0.71424476 | 0.11329523 | NA | HTR7    | HTR7      |
| ABHD6     | 2.0503227  | 0.76084925 | 0.11329523 | NA | NA      | ABHD6     |
| ADIPOR2   | 2.1669984  | 0.75632768 | 0.11329523 | NA | NA      | ADIPOR2   |
| ADSSL1    | -2.024042  | 1.31061038 | 0.11329523 | NA | NA      | ADSSL1    |
| AGFG1     | 2.1688378  | 0.76608477 | 0.11329523 | NA | NA      | AGFG1     |
| AJAP1     | -2.0384512 | 1.31571584 | 0.11329523 | NA | NA      | AJAP1     |
| AKR1C1    | -2.1625288 | 1.35573308 | 0.11329523 | NA | NA      | AKR1C1    |
| ANKRD29   | -2.0779442 | 1.53237741 | 0.11329523 | NA | NA      | ANKRD29   |
| AP1S2     | 2.1771745  | 0.7818732  | 0.11329523 | NA | NA      | AP1S2     |
| BVES      | -2.0094566 | 1.44099132 | 0.11329523 | NA | NA      | BVES      |
| C13orf36  | -2.0945015 | 2.13159181 | 0.11329523 | NA | NA      | C13orf36  |
| C1orf173  | 2.1605387  | 0.65197987 | 0.11329523 | NA | NA      | C1orf173  |
| C3orf50   | -2.036135  | 1.98550562 | 0.11329523 | NA | NA      | C3orf50   |
| C7orf36   | -2.157551  | 1.48566933 | 0.11329523 | NA | NA      | C7orf36   |
| CBARA1    | -2.0722511 | 1.36405196 | 0.11329523 | NA | NA      | CBARA1    |
| DRD1      | -2.1159006 | 1.84786237 | 0.11329523 | NA | NA      | DRD1      |
| EBPL      | -2.0174033 | 1.31289045 | 0.11329523 | NA | NA      | EBPL      |
| EML6      | 2.0822228  | 0.71419206 | 0.11329523 | NA | NA      | EML6      |
| EMX1      | 2.0036574  | 0.73095406 | 0.11329523 | NA | NA      | EMX1      |
| FRY       | 2.1460488  | 0.74024331 | 0.11329523 | NA | NA      | FRY       |
| GGCT      | -2.0093063 | 1.27766155 | 0.11329523 | NA | NA      | GGCT      |
| GRIK1     | 2.0950291  | 0.68395149 | 0.11329523 | NA | NA      | GRIK1     |
| GRM5      | -2.0873797 | 1.32209824 | 0.11329523 | NA | NA      | GRM5      |
| HAS2      | 2.0574799  | 0.6831462  | 0.11329523 | NA | NA      | HAS2      |
| LOC387763 | 2.0187893  | 0.76468361 | 0.11329523 | NA | NA      | LOC387763 |
| LRRC7     | 2.1384318  | 0.73077893 | 0.11329523 | NA | NA      | LRRC7     |
| MYF6      | -2.0699629 | 1.36606021 | 0.11329523 | NA | NA      | MYF6      |
| NECAB1    | 2.0109467  | 0.68407983 | 0.11329523 | NA | NA      | NECAB1    |
| NEDD4     | 2.1359013  | 0.73156625 | 0.11329523 | NA | NA      | NEDD4     |

|          |            |            |            |    |         |          |
|----------|------------|------------|------------|----|---------|----------|
| NUAK2    | 2.0193351  | 0.72768633 | 0.11329523 | NA | NA      | NUAK2    |
| OMG      | 2.0489617  | 0.72221266 | 0.11329523 | NA | NA      | OMG      |
| PDGFD    | 2.180256   | 0.67258826 | 0.11329523 | NA | NA      | PDGFD    |
| PDZD2    | 2.1692008  | 0.69590969 | 0.11329523 | NA | NA      | PDZD2    |
| PGBD5    | -2.0289311 | 1.31080757 | 0.11329523 | NA | NA      | PGBD5    |
| PTPRZ1   | 2.1107313  | 0.75631262 | 0.11329523 | NA | NA      | PTPRZ1   |
| RAB11A   | -2.0923258 | 1.24803638 | 0.11329523 | NA | NA      | RAB11A   |
| REM2     | -2.1261275 | 1.56858986 | 0.11329523 | NA | NA      | REM2     |
| RFC3     | 2.091419   | 0.71567047 | 0.11329523 | NA | NA      | RFC3     |
| RSPH9    | 2.0134479  | 0.74456472 | 0.11329523 | NA | NA      | RSPH9    |
| SERPINB6 | -2.0431848 | 1.28622809 | 0.11329523 | NA | NA      | SERPINB6 |
| SERTAD2  | 2.1096883  | 0.74027596 | 0.11329523 | NA | NA      | SERTAD2  |
| SFRS2B   | -2.1154615 | 1.27174603 | 0.11329523 | NA | NA      | SFRS2B   |
| SLC17A5  | -2.1683251 | 1.35369328 | 0.11329523 | NA | NA      | SLC17A5  |
| SLC26A8  | 2.0197541  | 0.66891371 | 0.11329523 | NA | NA      | SLC26A8  |
| SLC27A2  | 2.1396481  | 0.7838011  | 0.11329523 | NA | NA      | SLC27A2  |
| SMPDL3A  | 2.1051156  | 0.710081   | 0.11329523 | NA | NA      | SMPDL3A  |
| SNHG8    | 2.029819   | 0.76749506 | 0.11329523 | NA | NA      | SNHG8    |
| SV2B     | -2.1380977 | 1.40507555 | 0.11329523 | NA | NA      | SV2B     |
| TAF4B    | 2.163867   | 0.73515042 | 0.11329523 | NA | NA      | TAF4B    |
| TAPT1    | -2.0881596 | 1.24815485 | 0.11329523 | NA | NA      | TAPT1    |
| SATB2    | 2.0138674  | 0.6652304  | 0.11329523 | NA | SATB2   | SATB2    |
| SH3BP4   | -2.1323932 | 1.35398485 | 0.11329523 | NA | SH3BP4  | SH3BP4   |
| TARBP1   | 2.0160223  | 0.77167533 | 0.11329523 | NA | TARBP1  | TARBP1   |
| TBX21    | -2.0951755 | 1.50634971 | 0.11329523 | NA | TBX21   | TBX21    |
| ACVR1    | 1.9016813  | 0.74909317 | 0.19206239 | NA | ACVR1   | ACVR1    |
| AKAP13   | 1.8672226  | 0.77684803 | 0.19206239 | NA | AKAP13  | AKAP13   |
| ASS1     | -1.8757098 | 1.36348358 | 0.19206239 | NA | ASS1    | ASS1     |
| C9orf45  | 1.9496523  | 0.75910403 | 0.19206239 | NA | C9orf45 | C9orf45  |
| CYYR1    | -1.8344824 | 1.39509513 | 0.19206239 | NA | CYYR1   | CYYR1    |
| DPP3     | -1.8794705 | 1.2852484  | 0.19206239 | NA | DPP3    | DPP3     |
| DPYD     | 1.91158    | 0.75716218 | 0.19206239 | NA | DPYD    | DPYD     |
| HS3ST2   | -1.9807592 | 1.51306092 | 0.19206239 | NA | HS3ST2  | HS3ST2   |
| KLHL14   | -1.8384008 | 1.35188201 | 0.19206239 | NA | KLHL14  | KLHL14   |
| ADC      | 1.882217   | 0.74554495 | 0.19206239 | NA | NA      | ADC      |
| ADCY1    | 1.8937999  | 0.78767214 | 0.19206239 | NA | NA      | ADCY1    |
| AKAP7    | -1.9212017 | 1.33142677 | 0.19206239 | NA | NA      | AKAP7    |
| AKR1B1   | -1.8873825 | 1.26669329 | 0.19206239 | NA | NA      | AKR1B1   |
| ALDH7A1  | -1.9677894 | 1.56588168 | 0.19206239 | NA | NA      | ALDH7A1  |
| ANK2     | 1.9805793  | 0.68917144 | 0.19206239 | NA | NA      | ANK2     |
| ANKRD6   | -1.9501876 | 1.4522325  | 0.19206239 | NA | NA      | ANKRD6   |
| APBB2    | -1.9369471 | 1.33781927 | 0.19206239 | NA | NA      | APBB2    |
| ARHGAP12 | 1.9922063  | 0.64834482 | 0.19206239 | NA | NA      | ARHGAP12 |
| ARHGAP18 | 1.968179   | 0.70485716 | 0.19206239 | NA | NA      | ARHGAP18 |
| ATP2C1   | 1.8198191  | 0.76723843 | 0.19206239 | NA | NA      | ATP2C1   |
| BAI2     | 1.9038778  | 0.68664261 | 0.19206239 | NA | NA      | BAI2     |
| C10orf58 | -1.9142667 | 1.24940341 | 0.19206239 | NA | NA      | C10orf58 |
| C11orf75 | -1.9505339 | 1.68916961 | 0.19206239 | NA | NA      | C11orf75 |
| C14orf37 | 1.9223885  | 0.66899015 | 0.19206239 | NA | NA      | C14orf37 |
| C2orf3   | 1.8417981  | 0.75585756 | 0.19206239 | NA | NA      | C2orf3   |
| C2orf7   | -1.8899315 | 1.31692006 | 0.19206239 | NA | NA      | C2orf7   |
| CAMKV    | 1.8540275  | 0.77291741 | 0.19206239 | NA | NA      | CAMKV    |
| CAV1     | -1.8666365 | 1.46701097 | 0.19206239 | NA | NA      | CAV1     |
| CEP135   | 1.8777125  | 0.76959028 | 0.19206239 | NA | NA      | CEP135   |
| DEK      | 1.8585399  | 0.81623636 | 0.19206239 | NA | NA      | DEK      |
| DENND4C  | 1.8540265  | 0.79761758 | 0.19206239 | NA | NA      | DENND4C  |
| DYNC2H1  | 1.9865679  | 0.71849855 | 0.19206239 | NA | NA      | DYNC2H1  |
| EIF3D    | 1.8358103  | 0.81949329 | 0.19206239 | NA | NA      | EIF3D    |

|              |            |            |            |    |          |              |
|--------------|------------|------------|------------|----|----------|--------------|
| EPB41L3      | 1.819643   | 0.72224433 | 0.19206239 | NA | NA       | EPB41L3      |
| FABP7        | 1.9955677  | 0.69389679 | 0.19206239 | NA | NA       | FABP7        |
| FAM43A       | -1.8784603 | 1.28227334 | 0.19206239 | NA | NA       | FAM43A       |
| FRMD4B       | -1.9884055 | 1.29900971 | 0.19206239 | NA | NA       | FRMD4B       |
| GCA          | 1.9918127  | 0.6942364  | 0.19206239 | NA | NA       | GCA          |
| GHRH         | -1.8694463 | 1.32426279 | 0.19206239 | NA | NA       | GHRH         |
| HCN1         | 1.8768348  | 0.75954513 | 0.19206239 | NA | NA       | HCN1         |
| IGSF21       | 1.8198256  | 0.7643972  | 0.19206239 | NA | NA       | IGSF21       |
| IMPDH2       | 1.8557926  | 0.80768111 | 0.19206239 | NA | NA       | IMPDH2       |
| KCNAB1       | -1.9093715 | 1.39623488 | 0.19206239 | NA | NA       | KCNAB1       |
| KCNE1        | -1.9868154 | 1.38190226 | 0.19206239 | NA | NA       | KCNE1        |
| LOC100129550 | 1.8909605  | 0.74844148 | 0.19206239 | NA | NA       | LOC100129550 |
| LOC100134229 | -1.9667124 | 1.43010266 | 0.19206239 | NA | NA       | LOC100134229 |
| LOC151162    | -1.8938993 | 1.26626375 | 0.19206239 | NA | NA       | LOC151162    |
| LRRC8C       | -1.9658767 | 1.28337061 | 0.19206239 | NA | NA       | LRRC8C       |
| MYB          | -1.9590426 | 1.33546126 | 0.19206239 | NA | NA       | MYB          |
| MYC          | -1.8492218 | 1.26090084 | 0.19206239 | NA | NA       | MYC          |
| N4BP2L2      | 1.8287236  | 0.76511986 | 0.19206239 | NA | NA       | N4BP2L2      |
| NAP1L5       | -1.8801924 | 1.29018764 | 0.19206239 | NA | NA       | NAP1L5       |
| NPNT         | -1.8799266 | 1.43839345 | 0.19206239 | NA | NA       | NPNT         |
| PAG1         | 1.9923476  | 0.75355565 | 0.19206239 | NA | NA       | PAG1         |
| PHF17        | 1.9406617  | 0.73516516 | 0.19206239 | NA | NA       | PHF17        |
| PITPNC1      | -1.9241893 | 1.28031768 | 0.19206239 | NA | NA       | PITPNC1      |
| PLCXD2       | -1.8698634 | 1.26021415 | 0.19206239 | NA | NA       | PLCXD2       |
| RAB2B        | -1.8679581 | 1.22997804 | 0.19206239 | NA | NA       | RAB2B        |
| RHPN2        | 1.9213888  | 0.73483556 | 0.19206239 | NA | NA       | RHPN2        |
| RIN2         | 1.9573726  | 0.76035393 | 0.19206239 | NA | NA       | RIN2         |
| RP1-177G6.2  | 1.9769926  | 0.56392297 | 0.19206239 | NA | NA       | RP1-177G6.2  |
| RPH3A        | -1.8374374 | 1.75038429 | 0.19206239 | NA | NA       | RPH3A        |
| RPL37        | 1.8538167  | 0.80050686 | 0.19206239 | NA | NA       | RPL37        |
| SCNN1G       | -1.9659273 | 1.41568303 | 0.19206239 | NA | NA       | SCNN1G       |
| SLC46A3      | -1.8978447 | 1.28379808 | 0.19206239 | NA | NA       | SLC46A3      |
| SNAI2        | -1.8931277 | 1.42988906 | 0.19206239 | NA | NA       | SNAI2        |
| SUPT3H       | -1.8828569 | 1.41033346 | 0.19206239 | NA | NA       | SUPT3H       |
| SYDE2        | -1.9700165 | 1.40108213 | 0.19206239 | NA | NA       | SYDE2        |
| TIAM2        | 1.9183267  | 0.7270701  | 0.19206239 | NA | NA       | TIAM2        |
| TMEM74       | 1.9308704  | 0.72485958 | 0.19206239 | NA | NA       | TMEM74       |
| TMTC1        | 1.9325874  | 0.60091483 | 0.19206239 | NA | NA       | TMTC1        |
| TRIM44       | 1.9809887  | 0.76321079 | 0.19206239 | NA | NA       | TRIM44       |
| TSPAN18      | -1.941617  | 1.23064855 | 0.19206239 | NA | NA       | TSPAN18      |
| TSPAN6       | -1.9717261 | 1.54699507 | 0.19206239 | NA | NA       | TSPAN6       |
| WNT3         | -1.8373978 | 1.28145237 | 0.19206239 | NA | NA       | WNT3         |
| WNT5B        | 1.9573525  | 0.78654814 | 0.19206239 | NA | NA       | WNT5B        |
| ZNF438       | 1.9131199  | 0.79043807 | 0.19206239 | NA | NA       | ZNF438       |
| NOS1         | -1.9311619 | 1.2985339  | 0.19206239 | NA | NOS1     | NOS1         |
| PLOD2        | 1.8199163  | 0.63535707 | 0.19206239 | NA | PLOD2    | PLOD2        |
| RSL24D1      | 1.9607116  | 0.76287592 | 0.19206239 | NA | RSL24D1  | RSL24D1      |
| SNX9         | 1.8759538  | 0.72844561 | 0.19206239 | NA | SNX9     | SNX9         |
| ZADH2        | -1.9388644 | 1.33605933 | 0.19206239 | NA | ZADH2    | ZADH2        |
| ZNF706       | -1.8489992 | 1.22405684 | 0.19206239 | NA | ZNF706   | ZNF706       |
| AMOTL1       | -1.6708045 | 1.2233893  | 0.56921718 | NA | AMOTL1   | AMOTL1       |
| C1orf201     | 1.6867839  | 0.76162761 | 0.56921718 | NA | C1orf201 | C1orf201     |
| CHGB         | 1.6889775  | 0.80786526 | 0.56921718 | NA | CHGB     | CHGB         |
| DIAPH3       | -1.691133  | 1.316908   | 0.56921718 | NA | DIAPH3   | DIAPH3       |
| DUSP6        | -1.6648534 | 1.34244361 | 0.56921718 | NA | DUSP6    | DUSP6        |
| FBXL4        | 1.7030863  | 0.74322208 | 0.56921718 | NA | FBXL4    | FBXL4        |

|           |            |            |            |    |        |           |
|-----------|------------|------------|------------|----|--------|-----------|
| FOSL2     | -1.8048882 | 1.39235042 | 0.56921718 | NA | FOSL2  | FOSL2     |
| GRM3      | 1.7963915  | 0.79517321 | 0.56921718 | NA | GRM3   | GRM3      |
| ID4       | -1.714183  | 1.24941014 | 0.56921718 | NA | ID4    | ID4       |
| LRRC4C    | 1.7723172  | 0.78380855 | 0.56921718 | NA | LRRC4C | LRRC4C    |
| MAOA      | -1.7230175 | 1.26439033 | 0.56921718 | NA | MAOA   | MAOA      |
| MIAT      | 1.6685052  | 0.7468721  | 0.56921718 | NA | MIAT   | MIAT      |
| ABI2      | 1.8002732  | 0.78889966 | 0.56921718 | NA | NA     | ABI2      |
| ADD2      | 1.7072329  | 0.79782557 | 0.56921718 | NA | NA     | ADD2      |
| AHR       | 1.7311067  | 0.74526905 | 0.56921718 | NA | NA     | AHR       |
| ALS2      | 1.730133   | 0.77799375 | 0.56921718 | NA | NA     | ALS2      |
| AMMECR1   | 1.7897814  | 0.77927582 | 0.56921718 | NA | NA     | AMMECR1   |
| ARHGEF3   | -1.6834136 | 1.22494225 | 0.56921718 | NA | NA     | ARHGEF3   |
| ARL4C     | -1.7089553 | 1.21333535 | 0.56921718 | NA | NA     | ARL4C     |
| ATP2B1    | 1.7101363  | 0.78636865 | 0.56921718 | NA | NA     | ATP2B1    |
| B3GALTL   | -1.7134436 | 1.54733497 | 0.56921718 | NA | NA     | B3GALTL   |
| BCAP29    | 1.77772    | 0.79518995 | 0.56921718 | NA | NA     | BCAP29    |
| BCAR3     | 1.6554876  | 0.78105918 | 0.56921718 | NA | NA     | BCAR3     |
| C17orf58  | -1.664373  | 1.25174985 | 0.56921718 | NA | NA     | C17orf58  |
| CABP1     | 1.7476754  | 0.72210881 | 0.56921718 | NA | NA     | CABP1     |
| CHD3      | 1.7570376  | 0.74835474 | 0.56921718 | NA | NA     | CHD3      |
| CHRNA1    | -1.6878377 | 1.30251577 | 0.56921718 | NA | NA     | CHRNA1    |
| CSMD2     | 1.6504898  | 0.78251864 | 0.56921718 | NA | NA     | CSMD2     |
| CTGF      | -1.7315289 | 1.50144371 | 0.56921718 | NA | NA     | CTGF      |
| DGKH      | 1.6708511  | 0.81766292 | 0.56921718 | NA | NA     | DGKH      |
| DNAJC12   | -1.779901  | 1.33330638 | 0.56921718 | NA | NA     | DNAJC12   |
| E2F3      | -1.7467634 | 1.27894087 | 0.56921718 | NA | NA     | E2F3      |
| ECHDC3    | 1.7663812  | 0.70254225 | 0.56921718 | NA | NA     | ECHDC3    |
| FGFR1     | -1.7778665 | 1.21511311 | 0.56921718 | NA | NA     | FGFR1     |
| FNDC3B    | 1.7206151  | 0.81477116 | 0.56921718 | NA | NA     | FNDC3B    |
| FTL       | -1.6927348 | 1.23643025 | 0.56921718 | NA | NA     | FTL       |
| GNAL      | -1.6730574 | 1.82837731 | 0.56921718 | NA | NA     | GNAL      |
| GPR137C   | -1.7683416 | 1.45479059 | 0.56921718 | NA | NA     | GPR137C   |
| GPR63     | 1.7023713  | 0.67572853 | 0.56921718 | NA | NA     | GPR63     |
| HEATR1    | 1.7673478  | 0.6703171  | 0.56921718 | NA | NA     | HEATR1    |
| HSPA4L    | 1.7627049  | 0.69399936 | 0.56921718 | NA | NA     | HSPA4L    |
| HYMAI     | 1.7725019  | 0.66603623 | 0.56921718 | NA | NA     | HYMAI     |
| IPO8      | 1.7151015  | 0.7815551  | 0.56921718 | NA | NA     | IPO8      |
| JAK2      | 1.766462   | 0.78345728 | 0.56921718 | NA | NA     | JAK2      |
| KCNK2     | -1.6590451 | 1.31587451 | 0.56921718 | NA | NA     | KCNK2     |
| KLHL25    | 1.6601986  | 0.75803502 | 0.56921718 | NA | NA     | KLHL25    |
| LOC401097 | 1.7677791  | 0.6990811  | 0.56921718 | NA | NA     | LOC401097 |
| LYSMD3    | 1.6959089  | 0.74857584 | 0.56921718 | NA | NA     | LYSMD3    |
| MAN2A1    | 1.7357733  | 0.68817559 | 0.56921718 | NA | NA     | MAN2A1    |
| NALCN     | -1.7134353 | 1.33890556 | 0.56921718 | NA | NA     | NALCN     |
| NEFM      | 1.8104381  | 0.76583052 | 0.56921718 | NA | NA     | NEFM      |
| OAT       | -1.665461  | 1.23767024 | 0.56921718 | NA | NA     | OAT       |
| PAQR8     | -1.6793243 | 1.3547052  | 0.56921718 | NA | NA     | PAQR8     |
| PCOTH     | -1.7710008 | 1.2697666  | 0.56921718 | NA | NA     | PCOTH     |
| PPA2      | -1.716176  | 1.29695608 | 0.56921718 | NA | NA     | PPA2      |
| PPP1R3C   | -1.7865883 | 1.27858437 | 0.56921718 | NA | NA     | PPP1R3C   |
| PRDM10    | 1.7214244  | 0.80448983 | 0.56921718 | NA | NA     | PRDM10    |
| QPCT      | -1.6989685 | 1.52267803 | 0.56921718 | NA | NA     | QPCT      |
| RBM24     | 1.7236535  | 0.77326309 | 0.56921718 | NA | NA     | RBM24     |
| RGS16     | -1.6671199 | 1.33345675 | 0.56921718 | NA | NA     | RGS16     |
| SAMD3     | 1.8075569  | 0.77995226 | 0.56921718 | NA | NA     | SAMD3     |
| SCRN1     | 1.7554073  | 0.77450968 | 0.56921718 | NA | NA     | SCRN1     |
| SEMA3C    | -1.6712737 | 1.36815885 | 0.56921718 | NA | NA     | SEMA3C    |
| SHB       | 1.7365438  | 0.81139146 | 0.56921718 | NA | NA     | SHB       |

|          |            |            |            |    |          |          |
|----------|------------|------------|------------|----|----------|----------|
| SIPA1L2  | 1.7967593  | 0.81728709 | 0.56921718 | NA | NA       | SIPA1L2  |
| SLC17A8  | -1.6870861 | 1.51521774 | 0.56921718 | NA | NA       | SLC17A8  |
| SPATA13  | -1.6937885 | 1.32035141 | 0.56921718 | NA | NA       | SPATA13  |
| SYT9     | -1.7174943 | 1.24831857 | 0.56921718 | NA | NA       | SYT9     |
| TBC1D1   | -1.7283841 | 1.22658604 | 0.56921718 | NA | NA       | TBC1D1   |
| TBR1     | -1.7852788 | 1.28154788 | 0.56921718 | NA | NA       | TBR1     |
| TNFAIP3  | -1.7459981 | 1.72654034 | 0.56921718 | NA | NA       | TNFAIP3  |
| UBP1     | 1.7354988  | 0.76318925 | 0.56921718 | NA | NA       | UBP1     |
| VEPH1    | -1.6686711 | 1.21287794 | 0.56921718 | NA | NA       | VEPH1    |
| WWP2     | -1.6644297 | 1.26294759 | 0.56921718 | NA | NA       | WWP2     |
| NGB      | 1.6973064  | 0.81316304 | 0.56921718 | NA | NGB      | NGB      |
| NR2F2    | 1.6810585  | 0.78707751 | 0.56921718 | NA | NR2F2    | NR2F2    |
| NRXN3    | -1.6779785 | 1.23251032 | 0.56921718 | NA | NRXN3    | NRXN3    |
| PLXNC1   | -1.7689523 | 1.29644548 | 0.56921718 | NA | PLXNC1   | PLXNC1   |
| RAPGEFL1 | 1.7176713  | 0.71074745 | 0.56921718 | NA | RAPGEFL1 | RAPGEFL1 |
| RUNX2    | -1.6858028 | 1.28467826 | 0.56921718 | NA | RUNX2    | RUNX2    |
| SMAD3    | 1.7388772  | 0.78593321 | 0.56921718 | NA | SMAD3    | SMAD3    |
| ZAK      | 1.670217   | 0.71519869 | 0.56921718 | NA | ZAK      | ZAK      |
| ZHX2     | 1.7521996  | 0.76600304 | 0.56921718 | NA | ZHX2     | ZHX2     |
| AUH      | 1.5088174  | 0.79367185 | 0.88419955 | NA | AUH      | AUH      |
| CDH13    | 1.5766612  | 0.71012446 | 0.88419955 | NA | CDH13    | CDH13    |
| CLCN4    | -1.6496394 | 1.35400775 | 0.88419955 | NA | CLCN4    | CLCN4    |
| DCC      | -1.5468003 | 1.25641969 | 0.88419955 | NA | DCC      | DCC      |
| DMXL1    | 1.5936059  | 0.79464748 | 0.88419955 | NA | DMXL1    | DMXL1    |
| DNMT3A   | -1.6393412 | 1.26259462 | 0.88419955 | NA | DNMT3A   | DNMT3A   |
| KBTBD8   | 1.5720203  | 0.79932808 | 0.88419955 | NA | KBTBD8   | KBTBD8   |
| KIAA1958 | -1.5262747 | 1.26307324 | 0.88419955 | NA | KIAA1958 | KIAA1958 |
| MARK1    | 1.5520661  | 0.80040881 | 0.88419955 | NA | MARK1    | MARK1    |
| MDH1     | 1.6458122  | 0.7827652  | 0.88419955 | NA | MDH1     | MDH1     |
| MITF     | 1.626352   | 0.7826945  | 0.88419955 | NA | MITF     | MITF     |
| MYO1B    | -1.6535742 | 1.26905342 | 0.88419955 | NA | MYO1B    | MYO1B    |
| AMIGO2   | 1.5389169  | 0.79046747 | 0.88419955 | NA | NA       | AMIGO2   |
| ASPH     | 1.6025921  | 0.81486279 | 0.88419955 | NA | NA       | ASPH     |
| BCL2     | 1.6262094  | 0.72497361 | 0.88419955 | NA | NA       | BCL2     |
| BRAF     | 1.6067269  | 0.77384768 | 0.88419955 | NA | NA       | BRAF     |
| C11orf87 | -1.5472354 | 1.41698678 | 0.88419955 | NA | NA       | C11orf87 |
| C1GALT1  | -1.5028948 | 1.27063069 | 0.88419955 | NA | NA       | C1GALT1  |
| C6orf138 | -1.6177315 | 1.37118745 | 0.88419955 | NA | NA       | C6orf138 |
| CAPZA2   | 1.4915659  | 0.82907958 | 0.88419955 | NA | NA       | CAPZA2   |
| CCDC152  | 1.5109192  | 0.81777537 | 0.88419955 | NA | NA       | CCDC152  |
| CDK8     | 1.6055934  | 0.82417525 | 0.88419955 | NA | NA       | CDK8     |
| CLCC1    | -1.5448079 | 1.28666703 | 0.88419955 | NA | NA       | CLCC1    |
| CLCN5    | -1.6268313 | 1.230451   | 0.88419955 | NA | NA       | CLCN5    |
| CLGN     | -1.6539475 | 1.5093067  | 0.88419955 | NA | NA       | CLGN     |
| CLYBL    | 1.5408082  | 0.78965522 | 0.88419955 | NA | NA       | CLYBL    |
| CPNE6    | -1.6220942 | 1.36472646 | 0.88419955 | NA | NA       | CPNE6    |
| DDHD1    | 1.6422988  | 0.76981857 | 0.88419955 | NA | NA       | DDHD1    |
| DLEU2L   | 1.4927985  | 0.65515587 | 0.88419955 | NA | NA       | DLEU2L   |
| ELAVL4   | -1.588411  | 1.23423612 | 0.88419955 | NA | NA       | ELAVL4   |
| FABP6    | -1.6316726 | 1.23861445 | 0.88419955 | NA | NA       | FABP6    |
| GAS2L1   | 1.5550568  | 0.79647135 | 0.88419955 | NA | NA       | GAS2L1   |
| GAS2L3   | 1.5920415  | 0.75218211 | 0.88419955 | NA | NA       | GAS2L3   |
| GPD2     | 1.5940441  | 0.78962328 | 0.88419955 | NA | NA       | GPD2     |
| GPR177   | -1.5759886 | 1.44536871 | 0.88419955 | NA | NA       | GPR177   |
| GUCY1A3  | -1.5753948 | 1.37360364 | 0.88419955 | NA | NA       | GUCY1A3  |
| IRF2     | -1.5233308 | 1.44229607 | 0.88419955 | NA | NA       | IRF2     |
| JUN      | -1.6519549 | 1.47071215 | 0.88419955 | NA | NA       | JUN      |
| KEAP1    | -1.5697444 | 1.24489759 | 0.88419955 | NA | NA       | KEAP1    |

|         |            |            |            |    |         |         |
|---------|------------|------------|------------|----|---------|---------|
| KPNA2   | -1.5666428 | 1.24652842 | 0.88419955 | NA | NA      | KPNA2   |
| MAN1C1  | 1.5184786  | 0.83719153 | 0.88419955 | NA | NA      | MAN1C1  |
| MSH2    | -1.5195244 | 1.23633967 | 0.88419955 | NA | NA      | MSH2    |
| NBL1    | -1.5567805 | 1.26174467 | 0.88419955 | NA | NA      | NBL1    |
| NPHP3   | 1.6046245  | 0.80858105 | 0.88419955 | NA | NA      | NPHP3   |
| NRD1    | 1.5794877  | 0.77648009 | 0.88419955 | NA | NA      | NRD1    |
| NUDCD1  | 1.5156774  | 0.76342572 | 0.88419955 | NA | NA      | NUDCD1  |
| PACSIN1 | 1.5554403  | 0.8116957  | 0.88419955 | NA | NA      | PACSIN1 |
| PPAT    | 1.5750822  | 0.79892128 | 0.88419955 | NA | NA      | PPAT    |
| PPFIA2  | 1.6049976  | 0.82402652 | 0.88419955 | NA | NA      | PPFIA2  |
| PPP2R5A | 1.5226625  | 0.79373633 | 0.88419955 | NA | NA      | PPP2R5A |
| PRSS12  | 1.5393879  | 0.7075545  | 0.88419955 | NA | NA      | PRSS12  |
| PTGDS   | -1.5720961 | 1.54986996 | 0.88419955 | NA | NA      | PTGDS   |
| RCC2    | -1.6074405 | 1.25214465 | 0.88419955 | NA | NA      | RCC2    |
| RGMB    | 1.5259339  | 0.82087114 | 0.88419955 | NA | NA      | RGMB    |
| RHOBTB1 | 1.5203465  | 0.80651117 | 0.88419955 | NA | NA      | RHOBTB1 |
| RNF169  | 1.5327919  | 0.80108988 | 0.88419955 | NA | NA      | RNF169  |
| RPL37A  | 1.5098859  | 0.80697164 | 0.88419955 | NA | NA      | RPL37A  |
| RSPO3   | -1.5307645 | 1.28286727 | 0.88419955 | NA | NA      | RSPO3   |
| SCG2    | -1.5585077 | 1.37500787 | 0.88419955 | NA | NA      | SCG2    |
| SLC44A5 | 1.5080185  | 0.7401177  | 0.88419955 | NA | NA      | SLC44A5 |
| SLC5A3  | 1.6113967  | 0.81212852 | 0.88419955 | NA | NA      | SLC5A3  |
| SNX22   | 1.6470677  | 0.7752698  | 0.88419955 | NA | NA      | SNX22   |
| SSBP2   | 1.4973895  | 0.83258835 | 0.88419955 | NA | NA      | SSBP2   |
| STARD13 | 1.5338506  | 0.81861749 | 0.88419955 | NA | NA      | STARD13 |
| STRBP   | 1.5625995  | 0.76323323 | 0.88419955 | NA | NA      | STRBP   |
| TF      | -1.5563084 | 1.25399026 | 0.88419955 | NA | NA      | TF      |
| TGFB3   | -1.628569  | 1.28476102 | 0.88419955 | NA | NA      | TGFB3   |
| TLN2    | 1.6341747  | 0.79796596 | 0.88419955 | NA | NA      | TLN2    |
| TNRC6B  | 1.5843737  | 0.78946261 | 0.88419955 | NA | NA      | TNRC6B  |
| TSEN15  | -1.6274658 | 1.29362016 | 0.88419955 | NA | NA      | TSEN15  |
| UBE2L6  | -1.6195086 | 1.21735044 | 0.88419955 | NA | NA      | UBE2L6  |
| UVRAG   | 1.5689983  | 0.81164414 | 0.88419955 | NA | NA      | UVRAG   |
| ZDHHC23 | 1.5498989  | 0.74854916 | 0.88419955 | NA | NA      | ZDHHC23 |
| ZNF365  | 1.6080121  | 0.78220485 | 0.88419955 | NA | NA      | ZNF365  |
| PRKCB   | 1.623504   | 0.7653644  | 0.88419955 | NA | PRKCB   | PRKCB   |
| SH3KBP1 | 1.6217678  | 0.81439028 | 0.88419955 | NA | SH3KBP1 | SH3KBP1 |
| SMAD7   | 1.5822772  | 0.77254442 | 0.88419955 | NA | SMAD7   | SMAD7   |
| SPRED2  | -1.5160014 | 1.21935135 | 0.88419955 | NA | SPRED2  | SPRED2  |
| STAG2   | 1.5384991  | 0.80153576 | 0.88419955 | NA | STAG2   | STAG2   |
| SYT13   | 1.5262234  | 0.77492133 | 0.88419955 | NA | SYT13   | SYT13   |
| TDP1    | -1.6031528 | 1.24968789 | 0.88419955 | NA | TDP1    | TDP1    |
| TMEM47  | -1.6560851 | 1.2938101  | 0.88419955 | NA | TMEM47  | TMEM47  |
| TMEM5   | -1.5773597 | 1.27996903 | 0.88419955 | NA | TMEM5   | TMEM5   |
| ZNF395  | -1.598808  | 1.21514445 | 0.88419955 | NA | ZNF395  | ZNF395  |

### **MAR only PFOvsPT q<0.01**

| <b>SYMBOL</b> | <b>PFOvsPT.d</b> | <b>PFOvsPT.FC</b> | <b>PFOvsPT.q</b> | <b>HAR</b> | <b>CAR</b> | <b>MAR</b> |
|---------------|------------------|-------------------|------------------|------------|------------|------------|
| AADAT         | -2.5028615       | 0.7549555         | 0                | NA         | NA         | AADAT      |
| ABCA1         | -3.0361926       | 0.63183898        | 0                | NA         | NA         | ABCA1      |
| ACTN2         | 5.7230026        | 2.15670768        | 0                | NA         | NA         | ACTN2      |
| ACVR1C        | 4.1708629        | 2.27378292        | 0                | NA         | NA         | ACVR1C     |
| ADAMTS3       | -2.4132743       | 0.6734777         | 0                | NA         | NA         | ADAMTS3    |

|           |            |            |   |    |    |           |
|-----------|------------|------------|---|----|----|-----------|
| ADCY8     | -7.3811571 | 0.27123935 | 0 | NA | NA | ADCY8     |
| ADI1      | 2.2650305  | 1.32784445 | 0 | NA | NA | ADI1      |
| AK3L1     | -2.7061578 | 0.57984315 | 0 | NA | NA | AK3L1     |
| ANKH      | 2.6719111  | 1.46595885 | 0 | NA | NA | ANKH      |
| ANKRD57   | 3.0675827  | 1.54284388 | 0 | NA | NA | ANKRD57   |
| ANKS1B    | 5.4887345  | 2.15601428 | 0 | NA | NA | ANKS1B    |
| ANO3      | 2.3646069  | 2.08089745 | 0 | NA | NA | ANO3      |
| ANO4      | -3.3417516 | 0.65564835 | 0 | NA | NA | ANO4      |
| ANTXR2    | 3.9176954  | 1.71321708 | 0 | NA | NA | ANTXR2    |
| ARHGAP6   | -3.195736  | 0.53196867 | 0 | NA | NA | ARHGAP6   |
| ARHGEF6   | 2.8277758  | 1.55551638 | 0 | NA | NA | ARHGEF6   |
| ARL4A     | 2.511116   | 1.57865082 | 0 | NA | NA | ARL4A     |
| ASAH1     | 2.5440324  | 1.36247185 | 0 | NA | NA | ASAH1     |
| ASCL1     | 4.3720168  | 1.98767465 | 0 | NA | NA | ASCL1     |
| ATP8A2    | -2.771165  | 0.66020022 | 0 | NA | NA | ATP8A2    |
| B3GALT2   | 3.1860665  | 1.55387412 | 0 | NA | NA | B3GALT2   |
| B3GAT2    | -2.2564059 | 0.66397852 | 0 | NA | NA | B3GAT2    |
| B3GNT2    | -2.2363781 | 0.75103223 | 0 | NA | NA | B3GNT2    |
| BAMBI     | -2.5486832 | 0.57267348 | 0 | NA | NA | BAMBI     |
| BARD1     | 3.8839376  | 2.53533929 | 0 | NA | NA | BARD1     |
| BATF3     | 2.2609024  | 1.50106669 | 0 | NA | NA | BATF3     |
| BDNF      | -6.0284835 | 0.21138993 | 0 | NA | NA | BDNF      |
| BEND6     | 2.719765   | 1.59734737 | 0 | NA | NA | BEND6     |
| BHLHE40   | 2.4061711  | 1.4804062  | 0 | NA | NA | BHLHE40   |
| C14orf132 | 4.9873905  | 2.02334844 | 0 | NA | NA | C14orf132 |
| C16orf61  | -4.4408933 | 0.50901455 | 0 | NA | NA | C16orf61  |
| C18orf1   | 2.6272125  | 1.37630553 | 0 | NA | NA | C18orf1   |
| C1orf198  | -2.5560951 | 0.69344131 | 0 | NA | NA | C1orf198  |
| C3orf59   | -3.6667364 | 0.58192329 | 0 | NA | NA | C3orf59   |
| C6orf141  | -2.511954  | 0.64683456 | 0 | NA | NA | C6orf141  |
| CALB1     | -10.470768 | 0.08570738 | 0 | NA | NA | CALB1     |
| CAP2      | 2.3484789  | 1.34325557 | 0 | NA | NA | CAP2      |
| CBLN2     | -14.554868 | 0.08883734 | 0 | NA | NA | CBLN2     |
| CCDC109B  | 3.0258479  | 1.84030504 | 0 | NA | NA | CCDC109B  |
| CDCA7     | 2.3297026  | 1.36832726 | 0 | NA | NA | CDCA7     |
| CDCA7L    | -3.204917  | 0.54898463 | 0 | NA | NA | CDCA7L    |
| CDH3      | 2.8363774  | 1.51154625 | 0 | NA | NA | CDH3      |
| CENPF     | -2.9824191 | 0.63582166 | 0 | NA | NA | CENPF     |
| CHRDL1    | -4.5280955 | 0.34675859 | 0 | NA | NA | CHRDL1    |
| CHST8     | 2.9652964  | 2.04816076 | 0 | NA | NA | CHST8     |
| CLDN1     | -6.6031156 | 0.40869989 | 0 | NA | NA | CLDN1     |
| CNIH3     | -3.9901337 | 0.58182579 | 0 | NA | NA | CNIH3     |
| CNTNAP2   | -5.1222137 | 0.29933509 | 0 | NA | NA | CNTNAP2   |
| COL12A1   | -2.5600556 | 0.68578824 | 0 | NA | NA | COL12A1   |
| COMMD2    | 2.6738365  | 1.38859018 | 0 | NA | NA | COMMD2    |
| CRISPLD1  | -2.8583041 | 0.60569868 | 0 | NA | NA | CRISPLD1  |
| CSRP2     | -5.7836768 | 0.43376702 | 0 | NA | NA | CSRP2     |
| CUX1      | 8.0750155  | 2.94395919 | 0 | NA | NA | CUX1      |
| CXCR4     | 2.4724394  | 1.35294084 | 0 | NA | NA | CXCR4     |
| CXXC4     | -3.9002226 | 0.59401831 | 0 | NA | NA | CXXC4     |
| CXXC5     | -5.7185821 | 0.394487   | 0 | NA | NA | CXXC5     |
| CYP26A1   | -2.9104637 | 0.48298082 | 0 | NA | NA | CYP26A1   |
| DERA      | -3.2478245 | 0.52522287 | 0 | NA | NA | DERA      |
| DNER      | 2.2646872  | 1.47986504 | 0 | NA | NA | DNER      |
| DUSP10    | -4.7462373 | 0.52847573 | 0 | NA | NA | DUSP10    |
| DUSP4     | -4.5331275 | 0.42008895 | 0 | NA | NA | DUSP4     |
| EDIL3     | 2.4718718  | 1.39883668 | 0 | NA | NA | EDIL3     |
| EFR3A     | -2.5473489 | 0.67175085 | 0 | NA | NA | EFR3A     |

|          |            |            |   |    |    |          |
|----------|------------|------------|---|----|----|----------|
| EMX2     | -3.67376   | 0.42022704 | 0 | NA | NA | EMX2     |
| EPCAM    | 3.3607583  | 1.76213938 | 0 | NA | NA | EPCAM    |
| EPHA7    | 2.3254158  | 1.55426373 | 0 | NA | NA | EPHA7    |
| EPS15    | -2.380353  | 0.67254989 | 0 | NA | NA | EPS15    |
| F3       | -2.1747337 | 0.57731632 | 0 | NA | NA | F3       |
| FAM59A   | -2.4934649 | 0.56034191 | 0 | NA | NA | FAM59A   |
| FERMT2   | 4.2632045  | 2.08015025 | 0 | NA | NA | FERMT2   |
| FGFBP3   | 5.9094274  | 2.52106105 | 0 | NA | NA | FGFBP3   |
| FHDC1    | -6.7100988 | 0.39625724 | 0 | NA | NA | FHDC1    |
| FJX1     | 5.5721969  | 2.52410736 | 0 | NA | NA | FJX1     |
| FLJ11235 | 2.3242112  | 1.49174606 | 0 | NA | NA | FLJ11235 |
| FOXP1    | 2.5735375  | 1.39880052 | 0 | NA | NA | FOXP1    |
| FRZB     | 2.8764855  | 1.5006055  | 0 | NA | NA | FRZB     |
| FSTL5    | -9.134059  | 0.19439547 | 0 | NA | NA | FSTL5    |
| FZD4     | -2.5504763 | 0.67621129 | 0 | NA | NA | FZD4     |
| GAB1     | 2.4348477  | 1.37414607 | 0 | NA | NA | GAB1     |
| GABRG1   | 3.8878003  | 1.97031083 | 0 | NA | NA | GABRG1   |
| GALNT2   | -4.2925877 | 0.51157608 | 0 | NA | NA | GALNT2   |
| GCG      | -4.5083529 | 0.41817641 | 0 | NA | NA | GCG      |
| GHR      | 2.8771158  | 2.28682704 | 0 | NA | NA | GHR      |
| GLT25D2  | -3.7023891 | 0.60109911 | 0 | NA | NA | GLT25D2  |
| GPHN     | 2.5740778  | 1.37594102 | 0 | NA | NA | GPHN     |
| GPR22    | 3.3248308  | 2.09048899 | 0 | NA | NA | GPR22    |
| GPR37    | -2.8484793 | 0.60626699 | 0 | NA | NA | GPR37    |
| GPR88    | -3.4255545 | 0.45694561 | 0 | NA | NA | GPR88    |
| GPSM2    | -3.4162766 | 0.37118724 | 0 | NA | NA | GPSM2    |
| GREM1    | -2.8864642 | 0.36575241 | 0 | NA | NA | GREM1    |
| GREM2    | -4.9255321 | 0.24878345 | 0 | NA | NA | GREM2    |
| HCRTR2   | -2.6419059 | 0.56667983 | 0 | NA | NA | HCRTR2   |
| HEY1     | -3.7913367 | 0.67116494 | 0 | NA | NA | HEY1     |
| HIP1R    | -2.1829824 | 0.77544948 | 0 | NA | NA | HIP1R    |
| HS3ST1   | -2.2006599 | 0.70283541 | 0 | NA | NA | HS3ST1   |
| HS6ST3   | -3.6617101 | 0.39658062 | 0 | NA | NA | HS6ST3   |
| HSPA12A  | -4.2211371 | 0.48408819 | 0 | NA | NA | HSPA12A  |
| HTR1A    | 3.8667755  | 1.80561151 | 0 | NA | NA | HTR1A    |
| HUNK     | -3.5936681 | 0.61545926 | 0 | NA | NA | HUNK     |
| IL7      | -4.0113273 | 0.27551682 | 0 | NA | NA | IL7      |
| INTS12   | -2.4877879 | 0.73465381 | 0 | NA | NA | INTS12   |
| IRS2     | -3.4481015 | 0.66776093 | 0 | NA | NA | IRS2     |
| ITGA2    | 2.7273643  | 1.54145263 | 0 | NA | NA | ITGA2    |
| ITGA9    | -2.8155154 | 0.67196215 | 0 | NA | NA | ITGA9    |
| ITGAV    | 2.574707   | 1.4746765  | 0 | NA | NA | ITGAV    |
| ITPR1    | 3.6500924  | 1.5630158  | 0 | NA | NA | ITPR1    |
| JMJD1C   | 2.5771635  | 1.47716536 | 0 | NA | NA | JMJD1C   |
| JPH1     | -3.2960068 | 0.64061449 | 0 | NA | NA | JPH1     |
| KCNA5    | -5.2899544 | 0.39735418 | 0 | NA | NA | KCNA5    |
| KCNC2    | -2.9617191 | 0.6958676  | 0 | NA | NA | KCNC2    |
| KCNJ6    | -5.6306064 | 0.38743862 | 0 | NA | NA | KCNJ6    |
| KCNK9    | -3.5810556 | 0.55006032 | 0 | NA | NA | KCNK9    |
| KCNT2    | 2.3088159  | 1.8664929  | 0 | NA | NA | KCNT2    |
| KIAA0319 | 3.0140926  | 1.52666284 | 0 | NA | NA | KIAA0319 |
| KIAA0895 | 4.4775793  | 2.41716249 | 0 | NA | NA | KIAA0895 |
| KIAA1239 | 3.8815334  | 1.71595536 | 0 | NA | NA | KIAA1239 |
| KIAA1377 | -5.0111275 | 0.44634499 | 0 | NA | NA | KIAA1377 |
| KIAA1804 | 3.1060298  | 1.6038578  | 0 | NA | NA | KIAA1804 |
| KIT      | -3.1769796 | 0.6106721  | 0 | NA | NA | KIT      |
| KITLG    | 2.7996099  | 2.01379956 | 0 | NA | NA | KITLG    |
| KL       | 2.5219389  | 1.47537132 | 0 | NA | NA | KL       |



|           |            |            |   |    |    |           |
|-----------|------------|------------|---|----|----|-----------|
| KLHL32    | 5.6726516  | 4.06877152 | 0 | NA | NA | KLHL32    |
| KLHL8     | 3.0656515  | 1.43765531 | 0 | NA | NA | KLHL8     |
| KRT31     | -3.8344871 | 0.45747667 | 0 | NA | NA | KRT31     |
| LDB2      | -2.8931194 | 0.69446359 | 0 | NA | NA | LDB2      |
| LDLRAD3   | 4.0334391  | 1.96045483 | 0 | NA | NA | LDLRAD3   |
| LHFPL2    | -4.0089999 | 0.55907913 | 0 | NA | NA | LHFPL2    |
| LN2       | -2.7594468 | 0.63893267 | 0 | NA | NA | LN2       |
| LOC286002 | 6.6399202  | 2.6503824  | 0 | NA | NA | LOC286002 |
| LOX       | 4.6566289  | 1.91812442 | 0 | NA | NA | LOX       |
| LPL       | 2.7815804  | 1.40100464 | 0 | NA | NA | LPL       |
| LRRC3B    | -4.8019253 | 0.50656235 | 0 | NA | NA | LRRC3B    |
| LRRTM2    | -2.4679681 | 0.70045444 | 0 | NA | NA | LRRTM2    |
| LUZP2     | 2.5089308  | 2.16911589 | 0 | NA | NA | LUZP2     |
| MAL2      | -2.6502091 | 0.56569847 | 0 | NA | NA | MAL2      |
| MAP3K5    | -6.2555867 | 0.30492581 | 0 | NA | NA | MAP3K5    |
| MCHR2     | -3.564827  | 0.52414553 | 0 | NA | NA | MCHR2     |
| MCTP1     | 3.6104371  | 1.7227763  | 0 | NA | NA | MCTP1     |
| ME3       | -2.3898726 | 0.76248868 | 0 | NA | NA | ME3       |
| MEGF10    | -7.2306862 | 0.30931825 | 0 | NA | NA | MEGF10    |
| MEGF11    | -2.9538663 | 0.59606691 | 0 | NA | NA | MEGF11    |
| MET       | 3.6942663  | 1.7793356  | 0 | NA | NA | MET       |
| MIPEP     | -6.0186078 | 0.44075398 | 0 | NA | NA | MIPEP     |
| MOCS2     | 2.6924114  | 1.4670378  | 0 | NA | NA | MOCS2     |
| MPP6      | 2.8271169  | 2.19406594 | 0 | NA | NA | MPP6      |
| MRAP2     | 2.3949268  | 1.94789621 | 0 | NA | NA | MRAP2     |
| MTFR1     | 2.241794   | 1.3382267  | 0 | NA | NA | MTFR1     |
| MYO16     | -3.0542861 | 0.62416656 | 0 | NA | NA | MYO16     |
| MYO1E     | 2.4481187  | 1.47383707 | 0 | NA | NA | MYO1E     |
| NCOA2     | 2.3244361  | 1.5257123  | 0 | NA | NA | NCOA2     |
| NEBL      | -3.959623  | 0.55103234 | 0 | NA | NA | NEBL      |
| NEDD9     | -2.4947402 | 0.64373407 | 0 | NA | NA | NEDD9     |
| NEFL      | 6.1790036  | 3.17828345 | 0 | NA | NA | NEFL      |
| NEUROD1   | -7.5610329 | 0.20351525 | 0 | NA | NA | NEUROD1   |
| NFE2L3    | 3.2905816  | 2.18477987 | 0 | NA | NA | NFE2L3    |
| NME5      | -2.2837135 | 0.63575892 | 0 | NA | NA | NME5      |
| NPAS2     | 2.4130014  | 1.40564001 | 0 | NA | NA | NPAS2     |
| NPY       | 10.487701  | 6.55267487 | 0 | NA | NA | NPY       |
| NPY1R     | -2.8091789 | 0.64447802 | 0 | NA | NA | NPY1R     |
| NR2F1     | 4.5333847  | 2.03877837 | 0 | NA | NA | NR2F1     |
| NRIP1     | -3.2856362 | 0.5830483  | 0 | NA | NA | NRIP1     |
| NRN1      | 2.645197   | 1.63108886 | 0 | NA | NA | NRN1      |
| NTN4      | -4.3353016 | 0.46955142 | 0 | NA | NA | NTN4      |
| NTNG1     | 2.5601591  | 1.55650575 | 0 | NA | NA | NTNG1     |
| NUP93     | -3.4552735 | 0.64702256 | 0 | NA | NA | NUP93     |
| OSBPL6    | 2.5945569  | 1.54765722 | 0 | NA | NA | OSBPL6    |
| OTOR      | 3.3941304  | 3.10471059 | 0 | NA | NA | OTOR      |
| P2RY12    | 2.5446371  | 1.60869503 | 0 | NA | NA | P2RY12    |
| PACSIN2   | -2.7839704 | 0.69023739 | 0 | NA | NA | PACSIN2   |
| PAICS     | 3.8589303  | 1.62731124 | 0 | NA | NA | PAICS     |
| PAK7      | 4.4807926  | 1.71932096 | 0 | NA | NA | PAK7      |
| PALMD     | -3.1556924 | 0.54772368 | 0 | NA | NA | PALMD     |
| PAPPA2    | 3.3547903  | 1.47446083 | 0 | NA | NA | PAPPA2    |
| PCBD1     | -2.4006729 | 0.69718401 | 0 | NA | NA | PCBD1     |
| PCOLCE2   | 2.5204469  | 1.72293333 | 0 | NA | NA | PCOLCE2   |
| PCSK2     | 11.205976  | 7.94290912 | 0 | NA | NA | PCSK2     |
| PDE8B     | -2.9336571 | 0.5974711  | 0 | NA | NA | PDE8B     |
| PDZRN3    | 2.3995817  | 1.50896706 | 0 | NA | NA | PDZRN3    |
| PENK      | -6.7368517 | 0.15534614 | 0 | NA | NA | PENK      |

|           |            |            |   |    |    |           |
|-----------|------------|------------|---|----|----|-----------|
| PGM1      | -2.8866915 | 0.67661081 | 0 | NA | NA | PGM1      |
| PKP4      | -2.4639251 | 0.74636914 | 0 | NA | NA | PKP4      |
| PLCXD3    | 4.2669402  | 2.09958696 | 0 | NA | NA | PLCXD3    |
| PLEKHG1   | -3.4388593 | 0.42544483 | 0 | NA | NA | PLEKHG1   |
| POPDC3    | -4.034346  | 0.44640618 | 0 | NA | NA | POPDC3    |
| POU6F2    | -2.6805439 | 0.61101027 | 0 | NA | NA | POU6F2    |
| PPEF1     | 8.0271043  | 2.65600578 | 0 | NA | NA | PPEF1     |
| PROK2     | 3.9923299  | 2.47915943 | 0 | NA | NA | PROK2     |
| PRSS23    | -8.5327816 | 0.28705427 | 0 | NA | NA | PRSS23    |
| PRUNE2    | -2.1695295 | 0.72205202 | 0 | NA | NA | PRUNE2    |
| PTDSS1    | 3.5101653  | 1.53821303 | 0 | NA | NA | PTDSS1    |
| PTGFR     | -4.2996081 | 0.32996061 | 0 | NA | NA | PTGFR     |
| PTPN13    | 3.4056784  | 1.89521768 | 0 | NA | NA | PTPN13    |
| PTPN2     | 2.2949353  | 1.38436645 | 0 | NA | NA | PTPN2     |
| PTPRT     | -2.748046  | 0.58211594 | 0 | NA | NA | PTPRT     |
| PTX3      | -5.0063375 | 0.37142285 | 0 | NA | NA | PTX3      |
| RASGRP1   | 8.1145198  | 5.47859839 | 0 | NA | NA | RASGRP1   |
| RASL11B   | 4.6466211  | 1.82601874 | 0 | NA | NA | RASL11B   |
| RBP1      | -2.2620478 | 0.60211066 | 0 | NA | NA | RBP1      |
| RCAN1     | -3.188018  | 0.64036306 | 0 | NA | NA | RCAN1     |
| RCAN2     | -6.3698221 | 0.23271611 | 0 | NA | NA | RCAN2     |
| RFK       | -3.0766184 | 0.70024631 | 0 | NA | NA | RFK       |
| RFTN1     | -2.4595346 | 0.7249103  | 0 | NA | NA | RFTN1     |
| RGS8      | -2.4556735 | 0.57131777 | 0 | NA | NA | RGS8      |
| RGS9      | -2.3931161 | 0.6459222  | 0 | NA | NA | RGS9      |
| RPL23AP32 | 2.2281744  | 1.45333283 | 0 | NA | NA | RPL23AP32 |
| RPRML     | 3.4553787  | 2.52247291 | 0 | NA | NA | RPRML     |
| RRAS2     | -2.2138059 | 0.69630089 | 0 | NA | NA | RRAS2     |
| RXFP1     | -9.3099821 | 0.10886245 | 0 | NA | NA | RXFP1     |
| RXRG      | -5.5586275 | 0.33343658 | 0 | NA | NA | RXRG      |
| RYR3      | 5.4519481  | 2.62617986 | 0 | NA | NA | RYR3      |
| SAMD13    | -3.0569876 | 0.57550054 | 0 | NA | NA | SAMD13    |
| SAV1      | 4.2713176  | 2.00578038 | 0 | NA | NA | SAV1      |
| SDC2      | 2.240968   | 1.74016307 | 0 | NA | NA | SDC2      |
| SEMA3E    | -2.3056371 | 0.61154545 | 0 | NA | NA | SEMA3E    |
| SERPINI1  | 3.7436343  | 1.64648367 | 0 | NA | NA | SERPINI1  |
| SEZ6L     | 2.383783   | 1.42686764 | 0 | NA | NA | SEZ6L     |
| SGCG      | -3.5579458 | 0.34687456 | 0 | NA | NA | SGCG      |
| SGEF      | 3.0105396  | 1.93796991 | 0 | NA | NA | SGEF      |
| SGK1      | 4.5344644  | 1.83493955 | 0 | NA | NA | SGK1      |
| SH3D19    | -2.1801666 | 0.74770978 | 0 | NA | NA | SH3D19    |
| SHISA2    | 5.6562868  | 2.9829021  | 0 | NA | NA | SHISA2    |
| SLC12A2   | -2.2112538 | 0.65180215 | 0 | NA | NA | SLC12A2   |
| SLC17A7   | 3.8280472  | 1.52540202 | 0 | NA | NA | SLC17A7   |
| SLC35F2   | -2.9960979 | 0.50770383 | 0 | NA | NA | SLC35F2   |
| SLITRK3   | -4.2346195 | 0.48912647 | 0 | NA | NA | SLITRK3   |
| SLITRK4   | 2.2845762  | 1.34108423 | 0 | NA | NA | SLITRK4   |
| SMC4      | 3.2304147  | 1.50980659 | 0 | NA | NA | SMC4      |
| SNCAIP    | -2.3999304 | 0.69224844 | 0 | NA | NA | SNCAIP    |
| SOCS2     | -2.3828863 | 0.61493438 | 0 | NA | NA | SOCS2     |
| SOX9      | 12.91514   | 8.5897599  | 0 | NA | NA | SOX9      |
| SPIRE1    | 3.7605242  | 1.64272299 | 0 | NA | NA | SPIRE1    |
| SRI       | -2.2418818 | 0.7681904  | 0 | NA | NA | SRI       |
| SSTR1     | 2.2225815  | 2.22097851 | 0 | NA | NA | SSTR1     |
| ST3GAL1   | 2.3076774  | 1.53822723 | 0 | NA | NA | ST3GAL1   |
| ST6GAL2   | 4.5318538  | 2.25234251 | 0 | NA | NA | ST6GAL2   |
| STARD4    | 3.0072284  | 1.57480578 | 0 | NA | NA | STARD4    |
| STK31     | 3.157706   | 3.3372967  | 0 | NA | NA | STK31     |

|           |            |            |            |    |    |           |
|-----------|------------|------------|------------|----|----|-----------|
| SULF1     | -4.571398  | 0.36129893 | 0          | NA | NA | SULF1     |
| SVIP      | 3.1539867  | 1.57254303 | 0          | NA | NA | SVIP      |
| SYNPR     | 2.2112118  | 1.56197503 | 0          | NA | NA | SYNPR     |
| TACR2     | 2.2351101  | 1.52657575 | 0          | NA | NA | TACR2     |
| TAL2      | -2.8474592 | 0.50475296 | 0          | NA | NA | TAL2      |
| TBC1D8    | 3.2520082  | 1.77115654 | 0          | NA | NA | TBC1D8    |
| TCF7L2    | -2.7195924 | 0.68081731 | 0          | NA | NA | TCF7L2    |
| TDRD7     | 2.4033651  | 1.40422382 | 0          | NA | NA | TDRD7     |
| TGFA      | 3.641964   | 1.67924509 | 0          | NA | NA | TGFA      |
| TGFB2     | 5.2878672  | 2.62779239 | 0          | NA | NA | TGFB2     |
| TGFBR1    | 2.4199176  | 1.53225379 | 0          | NA | NA | TGFBR1    |
| THSD7A    | 3.3056219  | 1.81536778 | 0          | NA | NA | THSD7A    |
| TLK1      | 3.19175    | 1.61467051 | 0          | NA | NA | TLK1      |
| TMEM200A  | 4.5987098  | 2.05921209 | 0          | NA | NA | TMEM200A  |
| TMEM35    | -2.2798528 | 0.7120131  | 0          | NA | NA | TMEM35    |
| TNFRSF21  | -2.2771288 | 0.74740008 | 0          | NA | NA | TNFRSF21  |
| TNKS2     | 2.4188874  | 1.48700963 | 0          | NA | NA | TNKS2     |
| TP53I3    | -4.5234967 | 0.42963993 | 0          | NA | NA | TP53I3    |
| TRPC4     | 5.6127943  | 2.55992429 | 0          | NA | NA | TRPC4     |
| TRPC7     | 3.4270364  | 2.26915688 | 0          | NA | NA | TRPC7     |
| TSHZ1     | -2.7662182 | 0.65613151 | 0          | NA | NA | TSHZ1     |
| TSHZ3     | -4.8185133 | 0.41207351 | 0          | NA | NA | TSHZ3     |
| UFM1      | 2.5808817  | 1.48981756 | 0          | NA | NA | UFM1      |
| UNC13C    | 5.2100561  | 2.64098482 | 0          | NA | NA | UNC13C    |
| USP46     | 2.7529312  | 1.43437528 | 0          | NA | NA | USP46     |
| UST       | -2.3511955 | 0.61260421 | 0          | NA | NA | UST       |
| WIF1      | 2.9832351  | 2.95760793 | 0          | NA | NA | WIF1      |
| WNT7B     | 3.4683119  | 2.04962309 | 0          | NA | NA | WNT7B     |
| XK        | 2.2480153  | 1.58366096 | 0          | NA | NA | XK        |
| ZNF114    | -3.8851986 | 0.35458115 | 0          | NA | NA | ZNF114    |
| ZNF385B   | 3.1447634  | 2.1517861  | 0          | NA | NA | ZNF385B   |
| ZNF503    | 2.7163132  | 1.49572486 | 0          | NA | NA | ZNF503    |
| ZNF618    | 2.4840875  | 1.36965841 | 0          | NA | NA | ZNF618    |
| ABHD6     | 2.0503227  | 1.3143208  | 0.11329523 | NA | NA | ABHD6     |
| ADIPOR2   | 2.1669984  | 1.32217825 | 0.11329523 | NA | NA | ADIPOR2   |
| ADSSL1    | -2.024042  | 0.76300326 | 0.11329523 | NA | NA | ADSSL1    |
| AGFG1     | 2.1688378  | 1.30533858 | 0.11329523 | NA | NA | AGFG1     |
| AJAP1     | -2.0384512 | 0.76004253 | 0.11329523 | NA | NA | AJAP1     |
| AKR1C1    | -2.1625288 | 0.73760832 | 0.11329523 | NA | NA | AKR1C1    |
| ANKRD29   | -2.0779442 | 0.65258075 | 0.11329523 | NA | NA | ANKRD29   |
| AP1S2     | 2.1771745  | 1.27897977 | 0.11329523 | NA | NA | AP1S2     |
| BVES      | -2.0094566 | 0.6939667  | 0.11329523 | NA | NA | BVES      |
| C13orf36  | -2.0945015 | 0.46913297 | 0.11329523 | NA | NA | C13orf36  |
| C1orf173  | 2.1605387  | 1.53378968 | 0.11329523 | NA | NA | C1orf173  |
| C3orf50   | -2.036135  | 0.50365005 | 0.11329523 | NA | NA | C3orf50   |
| C7orf36   | -2.157551  | 0.67309729 | 0.11329523 | NA | NA | C7orf36   |
| CBARA1    | -2.0722511 | 0.7331099  | 0.11329523 | NA | NA | CBARA1    |
| DRD1      | -2.1159006 | 0.54116584 | 0.11329523 | NA | NA | DRD1      |
| EBPL      | -2.0174033 | 0.76167817 | 0.11329523 | NA | NA | EBPL      |
| EML6      | 2.0822228  | 1.40018359 | 0.11329523 | NA | NA | EML6      |
| EMX1      | 2.0036574  | 1.36807504 | 0.11329523 | NA | NA | EMX1      |
| FRY       | 2.1460488  | 1.35090718 | 0.11329523 | NA | NA | FRY       |
| GGCT      | -2.0093063 | 0.78267989 | 0.11329523 | NA | NA | GGCT      |
| GRIK1     | 2.0950291  | 1.462092   | 0.11329523 | NA | NA | GRIK1     |
| GRM5      | -2.0873797 | 0.75637345 | 0.11329523 | NA | NA | GRM5      |
| HAS2      | 2.0574799  | 1.4638155  | 0.11329523 | NA | NA | HAS2      |
| LOC387763 | 2.0187893  | 1.30773039 | 0.11329523 | NA | NA | LOC387763 |
| LRRC7     | 2.1384318  | 1.36840288 | 0.11329523 | NA | NA | LRRC7     |

|          |            |            |            |    |    |          |
|----------|------------|------------|------------|----|----|----------|
| MYF6     | -2.0699629 | 0.73203216 | 0.11329523 | NA | NA | MYF6     |
| NECAB1   | 2.0109467  | 1.4618177  | 0.11329523 | NA | NA | NECAB1   |
| NEDD4    | 2.1359013  | 1.3669302  | 0.11329523 | NA | NA | NEDD4    |
| NUAK2    | 2.0193351  | 1.37421848 | 0.11329523 | NA | NA | NUAK2    |
| OMG      | 2.0489617  | 1.38463372 | 0.11329523 | NA | NA | OMG      |
| PDGFD    | 2.180256   | 1.48679372 | 0.11329523 | NA | NA | PDGFD    |
| PDZD2    | 2.1692008  | 1.43696806 | 0.11329523 | NA | NA | PDZD2    |
| PGBD5    | -2.0289311 | 0.76288849 | 0.11329523 | NA | NA | PGBD5    |
| PTPRZ1   | 2.1107313  | 1.32220457 | 0.11329523 | NA | NA | PTPRZ1   |
| RAB11A   | -2.0923258 | 0.80125869 | 0.11329523 | NA | NA | RAB11A   |
| REM2     | -2.1261275 | 0.63751528 | 0.11329523 | NA | NA | REM2     |
| RFC3     | 2.091419   | 1.39729113 | 0.11329523 | NA | NA | RFC3     |
| RSPH9    | 2.0134479  | 1.3430666  | 0.11329523 | NA | NA | RSPH9    |
| SERPINB6 | -2.0431848 | 0.77746708 | 0.11329523 | NA | NA | SERPINB6 |
| SERTAD2  | 2.1096883  | 1.35084759 | 0.11329523 | NA | NA | SERTAD2  |
| SFRS2B   | -2.1154615 | 0.78632052 | 0.11329523 | NA | NA | SFRS2B   |
| SLC17A5  | -2.1683251 | 0.73871978 | 0.11329523 | NA | NA | SLC17A5  |
| SLC26A8  | 2.0197541  | 1.49496114 | 0.11329523 | NA | NA | SLC26A8  |
| SLC27A2  | 2.1396481  | 1.27583389 | 0.11329523 | NA | NA | SLC27A2  |
| SMPDL3A  | 2.1051156  | 1.40829005 | 0.11329523 | NA | NA | SMPDL3A  |
| SNHG8    | 2.029819   | 1.30293998 | 0.11329523 | NA | NA | SNHG8    |
| SV2B     | -2.1380977 | 0.7117055  | 0.11329523 | NA | NA | SV2B     |
| TAF4B    | 2.163867   | 1.36026583 | 0.11329523 | NA | NA | TAF4B    |
| TAPT1    | -2.0881596 | 0.80118264 | 0.11329523 | NA | NA | TAPT1    |
| ADC      | 1.882217   | 1.34130076 | 0.19206239 | NA | NA | ADC      |
| ADCY1    | 1.8937999  | 1.26956376 | 0.19206239 | NA | NA | ADCY1    |
| AKAP7    | -1.9212017 | 0.75107398 | 0.19206239 | NA | NA | AKAP7    |
| AKR1B1   | -1.8873825 | 0.78945709 | 0.19206239 | NA | NA | AKR1B1   |
| ALDH7A1  | -1.9677894 | 0.63861785 | 0.19206239 | NA | NA | ALDH7A1  |
| ANK2     | 1.9805793  | 1.45101776 | 0.19206239 | NA | NA | ANK2     |
| ANKRD6   | -1.9501876 | 0.68859497 | 0.19206239 | NA | NA | ANKRD6   |
| APBB2    | -1.9369471 | 0.74748512 | 0.19206239 | NA | NA | APBB2    |
| ARHGAP12 | 1.9922063  | 1.54238912 | 0.19206239 | NA | NA | ARHGAP12 |
| ARHGAP18 | 1.968179   | 1.41872716 | 0.19206239 | NA | NA | ARHGAP18 |
| ATP2C1   | 1.8198191  | 1.30337579 | 0.19206239 | NA | NA | ATP2C1   |
| BAI2     | 1.9038778  | 1.45636169 | 0.19206239 | NA | NA | BAI2     |
| C10orf58 | -1.9142667 | 0.800382   | 0.19206239 | NA | NA | C10orf58 |
| C11orf75 | -1.9505339 | 0.59200686 | 0.19206239 | NA | NA | C11orf75 |
| C14orf37 | 1.9223885  | 1.49479032 | 0.19206239 | NA | NA | C14orf37 |
| C2orf3   | 1.8417981  | 1.32300059 | 0.19206239 | NA | NA | C2orf3   |
| C2orf7   | -1.8899315 | 0.75934753 | 0.19206239 | NA | NA | C2orf7   |
| CAMKV    | 1.8540275  | 1.2937993  | 0.19206239 | NA | NA | CAMKV    |
| CAV1     | -1.8666365 | 0.68165816 | 0.19206239 | NA | NA | CAV1     |
| CEP135   | 1.8777125  | 1.29939271 | 0.19206239 | NA | NA | CEP135   |
| DEK      | 1.8585399  | 1.22513532 | 0.19206239 | NA | NA | DEK      |
| DENND4C  | 1.8540265  | 1.25373365 | 0.19206239 | NA | NA | DENND4C  |
| DYNC2H1  | 1.9865679  | 1.39179126 | 0.19206239 | NA | NA | DYNC2H1  |
| EIF3D    | 1.8358103  | 1.22026625 | 0.19206239 | NA | NA | EIF3D    |
| EPB41L3  | 1.819643   | 1.38457301 | 0.19206239 | NA | NA | EPB41L3  |
| FABP7    | 1.9955677  | 1.44113651 | 0.19206239 | NA | NA | FABP7    |
| FAM43A   | -1.8784603 | 0.77986492 | 0.19206239 | NA | NA | FAM43A   |
| FRMD4B   | -1.9884055 | 0.76981719 | 0.19206239 | NA | NA | FRMD4B   |
| GCA      | 1.9918127  | 1.44043152 | 0.19206239 | NA | NA | GCA      |
| GHRH     | -1.8694463 | 0.75513713 | 0.19206239 | NA | NA | GHRH     |
| HCN1     | 1.8768348  | 1.31657746 | 0.19206239 | NA | NA | HCN1     |
| IGSF21   | 1.8198256  | 1.30822039 | 0.19206239 | NA | NA | IGSF21   |
| IMPDH2   | 1.8557926  | 1.23811241 | 0.19206239 | NA | NA | IMPDH2   |
| KCNAB1   | -1.9093715 | 0.71621188 | 0.19206239 | NA | NA | KCNAB1   |

|              |            |            |            |    |    |              |
|--------------|------------|------------|------------|----|----|--------------|
| KCNE1        | -1.9868154 | 0.72364018 | 0.19206239 | NA | NA | KCNE1        |
| LOC100129550 | 1.8909605  | 1.3361098  | 0.19206239 | NA | NA | LOC100129550 |
| LOC100134229 | -1.9667124 | 0.6992505  | 0.19206239 | NA | NA | LOC100134229 |
| LOC151162    | -1.8938993 | 0.78972489 | 0.19206239 | NA | NA | LOC151162    |
| LRRC8C       | -1.9658767 | 0.77919815 | 0.19206239 | NA | NA | LRRC8C       |
| MYB          | -1.9590426 | 0.74880495 | 0.19206239 | NA | NA | MYB          |
| MYC          | -1.8492218 | 0.79308378 | 0.19206239 | NA | NA | MYC          |
| N4BP2L2      | 1.8287236  | 1.30698477 | 0.19206239 | NA | NA | N4BP2L2      |
| NAP1L5       | -1.8801924 | 0.77508106 | 0.19206239 | NA | NA | NAP1L5       |
| NPNT         | -1.8799266 | 0.69522007 | 0.19206239 | NA | NA | NPNT         |
| PAG1         | 1.9923476  | 1.327042   | 0.19206239 | NA | NA | PAG1         |
| PHF17        | 1.9406617  | 1.36023855 | 0.19206239 | NA | NA | PHF17        |
| PITPNC1      | -1.9241893 | 0.78105615 | 0.19206239 | NA | NA | PITPNC1      |
| PLCXD2       | -1.8698634 | 0.79351593 | 0.19206239 | NA | NA | PLCXD2       |
| RAB2B        | -1.8679581 | 0.81302264 | 0.19206239 | NA | NA | RAB2B        |
| RHPN2        | 1.9213888  | 1.36084867 | 0.19206239 | NA | NA | RHPN2        |
| RIN2         | 1.9573726  | 1.31517701 | 0.19206239 | NA | NA | RIN2         |
| RP1-177G6.2  | 1.9769926  | 1.77329184 | 0.19206239 | NA | NA | RP1-177G6.2  |
| RPH3A        | -1.8374374 | 0.57130312 | 0.19206239 | NA | NA | RPH3A        |
| RPL37        | 1.8538167  | 1.24920853 | 0.19206239 | NA | NA | RPL37        |
| SCNN1G       | -1.9659273 | 0.70637281 | 0.19206239 | NA | NA | SCNN1G       |
| SLC46A3      | -1.8978447 | 0.77893869 | 0.19206239 | NA | NA | SLC46A3      |
| SNAI2        | -1.8931277 | 0.69935496 | 0.19206239 | NA | NA | SNAI2        |
| SUPT3H       | -1.8828569 | 0.70905217 | 0.19206239 | NA | NA | SUPT3H       |
| SYDE2        | -1.9700165 | 0.71373403 | 0.19206239 | NA | NA | SYDE2        |
| TIAM2        | 1.9183267  | 1.37538321 | 0.19206239 | NA | NA | TIAM2        |
| TMEM74       | 1.9308704  | 1.37957754 | 0.19206239 | NA | NA | TMEM74       |
| TMTC1        | 1.9325874  | 1.66412935 | 0.19206239 | NA | NA | TMTC1        |
| TRIM44       | 1.9809887  | 1.31025402 | 0.19206239 | NA | NA | TRIM44       |
| TSPAN18      | -1.941617  | 0.81257968 | 0.19206239 | NA | NA | TSPAN18      |
| TSPAN6       | -1.9717261 | 0.64641447 | 0.19206239 | NA | NA | TSPAN6       |
| WNT3         | -1.8373978 | 0.78036455 | 0.19206239 | NA | NA | WNT3         |
| WNT5B        | 1.9573525  | 1.271378   | 0.19206239 | NA | NA | WNT5B        |
| ZNF438       | 1.9131199  | 1.26512126 | 0.19206239 | NA | NA | ZNF438       |
| ABI2         | 1.8002732  | 1.26758833 | 0.56921718 | NA | NA | ABI2         |
| ADD2         | 1.7072329  | 1.25340681 | 0.56921718 | NA | NA | ADD2         |
| AHR          | 1.7311067  | 1.3417973  | 0.56921718 | NA | NA | AHR          |
| ALS2         | 1.730133   | 1.28535736 | 0.56921718 | NA | NA | ALS2         |
| AMMECR1      | 1.7897814  | 1.28324269 | 0.56921718 | NA | NA | AMMECR1      |
| ARHGEF3      | -1.6834136 | 0.81636501 | 0.56921718 | NA | NA | ARHGEF3      |
| ARL4C        | -1.7089553 | 0.82417446 | 0.56921718 | NA | NA | ARL4C        |
| ATP2B1       | 1.7101363  | 1.2716682  | 0.56921718 | NA | NA | ATP2B1       |
| B3GALTL      | -1.7134436 | 0.64627247 | 0.56921718 | NA | NA | B3GALTL      |
| BCAP29       | 1.77772    | 1.25756116 | 0.56921718 | NA | NA | BCAP29       |
| BCAR3        | 1.6554876  | 1.28031272 | 0.56921718 | NA | NA | BCAR3        |
| C17orf58     | -1.664373  | 0.79888166 | 0.56921718 | NA | NA | C17orf58     |
| CABP1        | 1.7476754  | 1.38483284 | 0.56921718 | NA | NA | CABP1        |
| CHD3         | 1.7570376  | 1.33626467 | 0.56921718 | NA | NA | CHD3         |
| CHRNA1       | -1.6878377 | 0.76774502 | 0.56921718 | NA | NA | CHRNA1       |
| CSMD2        | 1.6504898  | 1.27792483 | 0.56921718 | NA | NA | CSMD2        |
| CTGF         | -1.7315289 | 0.66602563 | 0.56921718 | NA | NA | CTGF         |
| DGKH         | 1.6708511  | 1.22299786 | 0.56921718 | NA | NA | DGKH         |
| DNAJC12      | -1.779901  | 0.75001516 | 0.56921718 | NA | NA | DNAJC12      |
| E2F3         | -1.7467634 | 0.78189698 | 0.56921718 | NA | NA | E2F3         |
| ECHDC3       | 1.7663812  | 1.42340193 | 0.56921718 | NA | NA | ECHDC3       |
| FGFR1        | -1.7778665 | 0.82296865 | 0.56921718 | NA | NA | FGFR1        |

|           |            |            |            |    |    |           |
|-----------|------------|------------|------------|----|----|-----------|
| FNDC3B    | 1.7206151  | 1.22733849 | 0.56921718 | NA | NA | FNDC3B    |
| FTL       | -1.6927348 | 0.80877996 | 0.56921718 | NA | NA | FTL       |
| GNAL      | -1.6730574 | 0.54693306 | 0.56921718 | NA | NA | GNAL      |
| GPR137C   | -1.7683416 | 0.68738416 | 0.56921718 | NA | NA | GPR137C   |
| GPR63     | 1.7023713  | 1.47988423 | 0.56921718 | NA | NA | GPR63     |
| HEATR1    | 1.7673478  | 1.49183125 | 0.56921718 | NA | NA | HEATR1    |
| HSPA4L    | 1.7627049  | 1.44092352 | 0.56921718 | NA | NA | HSPA4L    |
| HYMAI     | 1.7725019  | 1.50141984 | 0.56921718 | NA | NA | HYMAI     |
| IPO8      | 1.7151015  | 1.27950032 | 0.56921718 | NA | NA | IPO8      |
| JAK2      | 1.766462   | 1.27639377 | 0.56921718 | NA | NA | JAK2      |
| KCNK2     | -1.6590451 | 0.75995088 | 0.56921718 | NA | NA | KCNK2     |
| KLHL25    | 1.6601986  | 1.31920026 | 0.56921718 | NA | NA | KLHL25    |
| LOC401097 | 1.7677791  | 1.4304492  | 0.56921718 | NA | NA | LOC401097 |
| LYSMD3    | 1.6959089  | 1.33586999 | 0.56921718 | NA | NA | LYSMD3    |
| MAN2A1    | 1.7357733  | 1.45311751 | 0.56921718 | NA | NA | MAN2A1    |
| NALCN     | -1.7134353 | 0.74687867 | 0.56921718 | NA | NA | NALCN     |
| NEFM      | 1.8104381  | 1.30577194 | 0.56921718 | NA | NA | NEFM      |
| OAT       | -1.665461  | 0.80796965 | 0.56921718 | NA | NA | OAT       |
| PAQR8     | -1.6793243 | 0.73816798 | 0.56921718 | NA | NA | PAQR8     |
| PCOTH     | -1.7710008 | 0.78754631 | 0.56921718 | NA | NA | PCOTH     |
| PPA2      | -1.716176  | 0.77103613 | 0.56921718 | NA | NA | PPA2      |
| PPP1R3C   | -1.7865883 | 0.78211499 | 0.56921718 | NA | NA | PPP1R3C   |
| PRDM10    | 1.7214244  | 1.24302379 | 0.56921718 | NA | NA | PRDM10    |
| QPCT      | -1.6989685 | 0.65673766 | 0.56921718 | NA | NA | QPCT      |
| RBM24     | 1.7236535  | 1.29322092 | 0.56921718 | NA | NA | RBM24     |
| RGS16     | -1.6671199 | 0.74993059 | 0.56921718 | NA | NA | RGS16     |
| SAMD3     | 1.8075569  | 1.28212975 | 0.56921718 | NA | NA | SAMD3     |
| SCRN1     | 1.7554073  | 1.29113944 | 0.56921718 | NA | NA | SCRN1     |
| SEMA3C    | -1.6712737 | 0.73090928 | 0.56921718 | NA | NA | SEMA3C    |
| SHB       | 1.7365438  | 1.23245074 | 0.56921718 | NA | NA | SHB       |
| SIPA1L2   | 1.7967593  | 1.22356026 | 0.56921718 | NA | NA | SIPA1L2   |
| SLC17A8   | -1.6870861 | 0.65997115 | 0.56921718 | NA | NA | SLC17A8   |
| SPATA13   | -1.6937885 | 0.75737413 | 0.56921718 | NA | NA | SPATA13   |
| SYT9      | -1.7174943 | 0.80107756 | 0.56921718 | NA | NA | SYT9      |
| TBC1D1    | -1.7283841 | 0.81527098 | 0.56921718 | NA | NA | TBC1D1    |
| TBR1      | -1.7852788 | 0.78030639 | 0.56921718 | NA | NA | TBR1      |
| TNFAIP3   | -1.7459981 | 0.57919295 | 0.56921718 | NA | NA | TNFAIP3   |
| UBP1      | 1.7354988  | 1.310291   | 0.56921718 | NA | NA | UBP1      |
| VEPH1     | -1.6686711 | 0.82448527 | 0.56921718 | NA | NA | VEPH1     |
| WWP2      | -1.6644297 | 0.7917985  | 0.56921718 | NA | NA | WWP2      |
| AMIGO2    | 1.5389169  | 1.2650742  | 0.88419955 | NA | NA | AMIGO2    |
| ASPH      | 1.6025921  | 1.22720047 | 0.88419955 | NA | NA | ASPH      |
| BCL2      | 1.6262094  | 1.37936056 | 0.88419955 | NA | NA | BCL2      |
| BRAF      | 1.6067269  | 1.29224398 | 0.88419955 | NA | NA | BRAF      |
| C11orf87  | -1.5472354 | 0.70572288 | 0.88419955 | NA | NA | C11orf87  |
| C1GALT1   | -1.5028948 | 0.78701074 | 0.88419955 | NA | NA | C1GALT1   |
| C6orf138  | -1.6177315 | 0.72929489 | 0.88419955 | NA | NA | C6orf138  |
| CAPZA2    | 1.4915659  | 1.20615683 | 0.88419955 | NA | NA | CAPZA2    |
| CCDC152   | 1.5109192  | 1.22282968 | 0.88419955 | NA | NA | CCDC152   |
| CDK8      | 1.6055934  | 1.21333418 | 0.88419955 | NA | NA | CDK8      |
| CLCC1     | -1.5448079 | 0.77720185 | 0.88419955 | NA | NA | CLCC1     |
| CLCN5     | -1.6268313 | 0.81271014 | 0.88419955 | NA | NA | CLCN5     |
| CLGN      | -1.6539475 | 0.66255586 | 0.88419955 | NA | NA | CLGN      |
| CLYBL     | 1.5408082  | 1.26637546 | 0.88419955 | NA | NA | CLYBL     |
| CPNE6     | -1.6220942 | 0.73274757 | 0.88419955 | NA | NA | CPNE6     |
| DDHD1     | 1.6422988  | 1.29900738 | 0.88419955 | NA | NA | DDHD1     |
| DLEU2L    | 1.4927985  | 1.52635434 | 0.88419955 | NA | NA | DLEU2L    |
| ELAVL4    | -1.588411  | 0.81021774 | 0.88419955 | NA | NA | ELAVL4    |

|         |            |            |            |    |    |         |
|---------|------------|------------|------------|----|----|---------|
| FABP6   | -1.6316726 | 0.80735373 | 0.88419955 | NA | NA | FABP6   |
| GAS2L1  | 1.5550568  | 1.25553795 | 0.88419955 | NA | NA | GAS2L1  |
| GAS2L3  | 1.5920415  | 1.32946527 | 0.88419955 | NA | NA | GAS2L3  |
| GPD2    | 1.5940441  | 1.26642669 | 0.88419955 | NA | NA | GPD2    |
| GPR177  | -1.5759886 | 0.69186499 | 0.88419955 | NA | NA | GPR177  |
| GUCY1A3 | -1.5753948 | 0.72801205 | 0.88419955 | NA | NA | GUCY1A3 |
| IRF2    | -1.5233308 | 0.69333892 | 0.88419955 | NA | NA | IRF2    |
| JUN     | -1.6519549 | 0.67994271 | 0.88419955 | NA | NA | JUN     |
| KEAP1   | -1.5697444 | 0.80327893 | 0.88419955 | NA | NA | KEAP1   |
| KPNA2   | -1.5666428 | 0.802228   | 0.88419955 | NA | NA | KPNA2   |
| MAN1C1  | 1.5184786  | 1.1944698  | 0.88419955 | NA | NA | MAN1C1  |
| MSH2    | -1.5195244 | 0.80883921 | 0.88419955 | NA | NA | MSH2    |
| NBL1    | -1.5567805 | 0.79255338 | 0.88419955 | NA | NA | NBL1    |
| NPHP3   | 1.6046245  | 1.2367344  | 0.88419955 | NA | NA | NPHP3   |
| NRD1    | 1.5794877  | 1.28786303 | 0.88419955 | NA | NA | NRD1    |
| NUDCD1  | 1.5156774  | 1.30988513 | 0.88419955 | NA | NA | NUDCD1  |
| PACSIN1 | 1.5554403  | 1.23198878 | 0.88419955 | NA | NA | PACSIN1 |
| PPAT    | 1.5750822  | 1.25168778 | 0.88419955 | NA | NA | PPAT    |
| PPFIA2  | 1.6049976  | 1.21355317 | 0.88419955 | NA | NA | PPFIA2  |
| PPP2R5A | 1.5226625  | 1.25986421 | 0.88419955 | NA | NA | PPP2R5A |
| PRSS12  | 1.5393879  | 1.41331869 | 0.88419955 | NA | NA | PRSS12  |
| PTGDS   | -1.5720961 | 0.64521542 | 0.88419955 | NA | NA | PTGDS   |
| RCC2    | -1.6074405 | 0.79862977 | 0.88419955 | NA | NA | RCC2    |
| RGMB    | 1.5259339  | 1.218218   | 0.88419955 | NA | NA | RGMB    |
| RHOBTB1 | 1.5203465  | 1.23990843 | 0.88419955 | NA | NA | RHOBTB1 |
| RNF169  | 1.5327919  | 1.24829937 | 0.88419955 | NA | NA | RNF169  |
| RPL37A  | 1.5098859  | 1.23920092 | 0.88419955 | NA | NA | RPL37A  |
| RSPO3   | -1.5307645 | 0.77950387 | 0.88419955 | NA | NA | RSPO3   |
| SCG2    | -1.5585077 | 0.72726856 | 0.88419955 | NA | NA | SCG2    |
| SLC44A5 | 1.5080185  | 1.35113644 | 0.88419955 | NA | NA | SLC44A5 |
| SLC5A3  | 1.6113967  | 1.23133221 | 0.88419955 | NA | NA | SLC5A3  |
| SNX22   | 1.6470677  | 1.28987355 | 0.88419955 | NA | NA | SNX22   |
| SSBP2   | 1.4973895  | 1.20107373 | 0.88419955 | NA | NA | SSBP2   |
| STARD13 | 1.5338506  | 1.22157176 | 0.88419955 | NA | NA | STARD13 |
| STRBP   | 1.5625995  | 1.31021548 | 0.88419955 | NA | NA | STRBP   |
| TF      | -1.5563084 | 0.79745436 | 0.88419955 | NA | NA | TF      |
| TGFB3   | -1.628569  | 0.77835487 | 0.88419955 | NA | NA | TGFB3   |
| TLN2    | 1.6341747  | 1.25318628 | 0.88419955 | NA | NA | TLN2    |
| TNRC6B  | 1.5843737  | 1.26668444 | 0.88419955 | NA | NA | TNRC6B  |
| TSEN15  | -1.6274658 | 0.77302444 | 0.88419955 | NA | NA | TSEN15  |
| UBE2L6  | -1.6195086 | 0.82145615 | 0.88419955 | NA | NA | UBE2L6  |
| UVRAG   | 1.5689983  | 1.23206705 | 0.88419955 | NA | NA | UVRAG   |
| ZDHHC23 | 1.5498989  | 1.3359176  | 0.88419955 | NA | NA | ZDHHC23 |
| ZNF365  | 1.6080121  | 1.27843748 | 0.88419955 | NA | NA | ZNF365  |

## HAR 17vs19 q<0.01

| SYMBOL   | 17vs19.d   | 17vs19.FC  | 17vs19.q | HAR      | CAR      | MAR    |
|----------|------------|------------|----------|----------|----------|--------|
| ALG10    | -4.3960045 | 1.61044113 | 0        | ALG10    | ALG10    | ALG10  |
| CYorf15A | 4.8826982  | 0.33984058 | 0        | CYorf15A | CYorf15A | NA     |
| DAZ3     | 3.1560883  | 0.66021176 | 0        | DAZ3     | DAZ3     | NA     |
| FAM27A   | 3.7260472  | 0.66240645 | 0        | FAM27A   | FAM27A   | FAM27A |
| FRG1B    | 4.9790263  | 0.53342964 | 0        | FRG1B    | FRG1B    | NA     |
| GPC6     | -2.9574624 | 1.70632811 | 0        | GPC6     | GPC6     | GPC6   |
| KGFLP1   | -6.0498232 | 1.92952432 | 0        | KGFLP1   | KGFLP1   | KGFLP1 |

|              |            |            |            |              |              |           |
|--------------|------------|------------|------------|--------------|--------------|-----------|
| LOC645166    | 2.9873503  | 0.70416815 | 0          | LOC645166    | LOC645166    | NA        |
| LOC654342    | 4.2238118  | 0.61249671 | 0          | LOC654342    | LOC654342    | NA        |
| MPDZ         | -3.8035766 | 1.38811298 | 0          | MPDZ         | MPDZ         | MPDZ      |
| MYOM2        | 3.9185099  | 0.60750334 | 0          | MYOM2        | MYOM2        | MYOM2     |
| AFAP1L2      | -3.1976804 | 1.61900834 | 0          | AFAP1L2      | NA           | AFAP1L2   |
| CDR2         | -4.3926751 | 1.59802619 | 0          | CDR2         | NA           | CDR2      |
| DAD1         | -3.4090834 | 1.42475318 | 0          | DAD1         | NA           | DAD1      |
| DKK2         | -2.7972101 | 1.54347974 | 0          | DKK2         | NA           | DKK2      |
| FAM19A2      | 3.0791036  | 0.75560504 | 0          | FAM19A2      | NA           | FAM19A2   |
| FOXC1        | -3.4526707 | 1.89779589 | 0          | FOXC1        | NA           | FOXC1     |
| GSTT2        | 4.7937351  | 0.46999547 | 0          | GSTT2        | NA           | NA        |
| KLF5         | -3.3245929 | 1.31204257 | 0          | KLF5         | NA           | KLF5      |
| LOC654433    | 6.1800862  | 0.38815097 | 0          | LOC654433    | NA           | LOC654433 |
| LOC80154     | 4.1659068  | 0.69723599 | 0          | LOC80154     | NA           | NA        |
| NANOS1       | 3.0195092  | 0.76802038 | 0          | NANOS1       | NA           | NANOS1    |
| NIPSNAP3A    | 6.4560253  | 0.48119602 | 0          | NIPSNAP3A    | NA           | NA        |
| NLGN4Y       | 11.059543  | 0.23828453 | 0          | NLGN4Y       | NA           | NA        |
| PITPNM3      | 3.1659088  | 0.71006956 | 0          | PITPNM3      | NA           | PITPNM3   |
| SRR          | -4.3326417 | 1.52243837 | 0          | SRR          | NA           | SRR       |
| SSR1         | -3.1579583 | 1.33434048 | 0          | SSR1         | NA           | SSR1      |
| STAG3L4      | -5.9270751 | 1.80174807 | 0          | STAG3L4      | NA           | STAG3L4   |
| TBC1D15      | -2.7400071 | 1.3902345  | 0          | TBC1D15      | NA           | TBC1D15   |
| VIP          | 3.1452416  | 0.72815259 | 0          | VIP          | NA           | VIP       |
| ZFR          | -2.6851191 | 1.38190809 | 0          | ZFR          | NA           | NA        |
| ZNF385D      | -2.6964259 | 1.68972635 | 0          | ZNF385D      | NA           | NA        |
| SDPR         | -3.040839  | 1.4477601  | 0          | SDPR         | SDPR         | SDPR      |
| TTY15        | 16.499994  | 0.04287293 | 0          | TTY15        | TTY15        | TTY15     |
| C7orf28B     | -2.5054821 | 1.33288865 | 0.15408684 | C7orf28B     | C7orf28B     | NA        |
| DAZ1         | 2.8255536  | 0.75360375 | 0.15408684 | DAZ1         | DAZ1         | NA        |
| EDNRA        | -2.5143927 | 1.50640502 | 0.15408684 | EDNRA        | EDNRA        | EDNRA     |
| ITIH5        | -2.3664665 | 1.25547418 | 0.15408684 | ITIH5        | ITIH5        | ITIH5     |
| MAP3K7       | -2.3125599 | 1.23669912 | 0.15408684 | MAP3K7       | MAP3K7       | MAP3K7    |
| APCDD1       | -2.375738  | 1.25099685 | 0.15408684 | APCDD1       | NA           | APCDD1    |
| BPGM         | -2.4073412 | 1.32814895 | 0.15408684 | BPGM         | NA           | BPGM      |
| C9orf72      | -2.3188655 | 1.25802647 | 0.15408684 | C9orf72      | NA           | C9orf72   |
| DAZ4         | 2.859064   | 0.57365678 | 0.15408684 | DAZ4         | NA           | DAZ4      |
| LOC400657    | -2.6144841 | 1.26930781 | 0.15408684 | LOC400657    | NA           | LOC400657 |
| PRKAB2       | -2.4229614 | 1.32794586 | 0.15408684 | PRKAB2       | NA           | PRKAB2    |
| PZP          | 2.7303672  | 0.75805215 | 0.15408684 | PZP          | NA           | NA        |
| TMSB4Y       | 2.7244112  | 0.74036259 | 0.15408684 | TMSB4Y       | NA           | NA        |
| TOP1         | -2.5863571 | 1.42133876 | 0.15408684 | TOP1         | NA           | TOP1      |
| NFU1         | 2.5576059  | 0.78910103 | 0.15408684 | NFU1         | NFU1         | NFU1      |
| NKAIN3       | 2.9072777  | 0.80136794 | 0.15408684 | NKAIN3       | NKAIN3       | NKAIN3    |
| PKN2         | -2.5086486 | 1.30100005 | 0.15408684 | PKN2         | PKN2         | PKN2      |
| PSAT1        | -2.3191814 | 1.22755029 | 0.15408684 | PSAT1        | PSAT1        | PSAT1     |
| TARSL2       | 2.4999564  | 0.80142314 | 0.15408684 | TARSL2       | TARSL2       | NA        |
| WSB1         | -2.3133712 | 1.38965777 | 0.15408684 | WSB1         | WSB1         | WSB1      |
| ATOH1        | 2.1058924  | 0.72609592 | 0.52040198 | ATOH1        | ATOH1        | ATOH1     |
| EFCAB4B      | 2.4987579  | 0.8501656  | 0.52040198 | EFCAB4B      | EFCAB4B      | EFCAB4B   |
| FAM96A       | -1.9027157 | 1.18994558 | 0.52040198 | FAM96A       | FAM96A       | FAM96A    |
| FAT1         | -2.1651627 | 1.28255083 | 0.52040198 | FAT1         | FAT1         | FAT1      |
| FRMD6        | -2.2175814 | 1.30253868 | 0.52040198 | FRMD6        | FRMD6        | FRMD6     |
| KCTD12       | -1.9045931 | 1.28329693 | 0.52040198 | KCTD12       | KCTD12       | KCTD12    |
| KDR          | -2.1881049 | 1.32116515 | 0.52040198 | KDR          | KDR          | KDR       |
| LOC100132832 | 2.3888489  | 0.7146981  | 0.52040198 | LOC100132832 | LOC100132832 | NA        |
| LOC400891    | -1.9715033 | 1.18672323 | 0.52040198 | LOC400891    | LOC400891    | NA        |
| ADPGK        | -2.0753836 | 1.21126407 | 0.52040198 | ADPGK        | NA           | ADPGK     |
| ALDH6A1      | -1.9990247 | 1.22934956 | 0.52040198 | ALDH6A1      | NA           | ALDH6A1   |



|           |            |            |            |           |        |           |
|-----------|------------|------------|------------|-----------|--------|-----------|
| CA9       | 2.0772529  | 0.71449784 | 0.52040198 | CA9       | NA     | CA9       |
| DULLARD   | 2.3121778  | 0.81341173 | 0.52040198 | DULLARD   | NA     | NA        |
| FCGR3B    | -2.1865778 | 1.17965061 | 0.52040198 | FCGR3B    | NA     | NA        |
| FLJ46321  | 2.44914    | 0.76711204 | 0.52040198 | FLJ46321  | NA     | FLJ46321  |
| GH1       | 2.1085009  | 0.82681608 | 0.52040198 | GH1       | NA     | NA        |
| HLA-DRB1  | 2.1210444  | 0.68540221 | 0.52040198 | HLA-DRB1  | NA     | NA        |
| IFLTD1    | 2.4490002  | 0.75215324 | 0.52040198 | IFLTD1    | NA     | IFLTD1    |
| LOC541471 | -2.1699253 | 1.20290734 | 0.52040198 | LOC541471 | NA     | LOC541471 |
| MGST2     | -2.1789181 | 1.41626241 | 0.52040198 | MGST2     | NA     | MGST2     |
| NEK8      | 2.0962729  | 0.78434452 | 0.52040198 | NEK8      | NA     | NA        |
| ORC2L     | -1.9637817 | 1.46302166 | 0.52040198 | ORC2L     | NA     | ORC2L     |
| PARP4     | -2.0216843 | 1.56362627 | 0.52040198 | PARP4     | NA     | NA        |
| PAX8      | 2.1322173  | 0.81230924 | 0.52040198 | PAX8      | NA     | PAX8      |
| PCDHA3    | 2.3164964  | 0.74777155 | 0.52040198 | PCDHA3    | NA     | NA        |
| SPA17     | 2.2711195  | 0.77403425 | 0.52040198 | SPA17     | NA     | NA        |
| TCEA3     | 2.0861038  | 0.79924679 | 0.52040198 | TCEA3     | NA     | TCEA3     |
| TMTC2     | -2.1768285 | 1.45902545 | 0.52040198 | TMTC2     | NA     | TMTC2     |
| TUBG2     | 2.2009254  | 0.7412214  | 0.52040198 | TUBG2     | NA     | NA        |
| TXNL1     | -1.9519404 | 1.29571028 | 0.52040198 | TXNL1     | NA     | TXNL1     |
| ZBBX      | 2.4536853  | 0.74870382 | 0.52040198 | ZBBX      | NA     | ZBBX      |
| NHLH2     | -1.9479143 | 1.31275162 | 0.52040198 | NHLH2     | NHLH2  | NA        |
| PLXNA2    | -1.9743795 | 1.4904532  | 0.52040198 | PLXNA2    | PLXNA2 | PLXNA2    |
| TLE4      | -2.2209082 | 1.42075177 | 0.52040198 | TLE4      | TLE4   | TLE4      |
| ZNF200    | -2.1070827 | 1.20967709 | 0.52040198 | ZNF200    | ZNF200 | NA        |

## **HAR-CAR 17vs19 q<0.01**

| <b>SYMBOL</b> | <b>17vs19.d</b> | <b>17vs19.FC</b> | <b>17vs19.q</b> | <b>HAR</b> | <b>CAR</b> | <b>MAR</b> |
|---------------|-----------------|------------------|-----------------|------------|------------|------------|
| AFAP1L2       | -3.1976804      | 1.61900834       | 0               | AFAP1L2    | NA         | AFAP1L2    |
| CDR2          | -4.3926751      | 1.59802619       | 0               | CDR2       | NA         | CDR2       |
| DAD1          | -3.4090834      | 1.42475318       | 0               | DAD1       | NA         | DAD1       |
| DKK2          | -2.7972101      | 1.54347974       | 0               | DKK2       | NA         | DKK2       |
| FAM19A2       | 3.0791036       | 0.75560504       | 0               | FAM19A2    | NA         | FAM19A2    |
| FOXC1         | -3.4526707      | 1.89779589       | 0               | FOXC1      | NA         | FOXC1      |
| KLF5          | -3.3245929      | 1.31204257       | 0               | KLF5       | NA         | KLF5       |
| LOC654433     | 6.1800862       | 0.38815097       | 0               | LOC654433  | NA         | LOC654433  |
| GSTT2         | 4.7937351       | 0.46999547       | 0               | GSTT2      | NA         | NA         |
| LOC80154      | 4.1659068       | 0.69723599       | 0               | LOC80154   | NA         | NA         |
| NIPSNAP3A     | 6.4560253       | 0.48119602       | 0               | NIPSNAP3A  | NA         | NA         |
| NLGN4Y        | 11.059543       | 0.23828453       | 0               | NLGN4Y     | NA         | NA         |
| ZFR           | -2.6851191      | 1.38190809       | 0               | ZFR        | NA         | NA         |
| ZNF385D       | -2.6964259      | 1.68972635       | 0               | ZNF385D    | NA         | NA         |
| NANOS1        | 3.0195092       | 0.76802038       | 0               | NANOS1     | NA         | NANOS1     |
| PITPNM3       | 3.1659088       | 0.71006956       | 0               | PITPNM3    | NA         | PITPNM3    |
| SRR           | -4.3326417      | 1.52243837       | 0               | SRR        | NA         | SRR        |
| SSR1          | -3.1579583      | 1.33434048       | 0               | SSR1       | NA         | SSR1       |
| STAG3L4       | -5.9270751      | 1.80174807       | 0               | STAG3L4    | NA         | STAG3L4    |
| TBC1D15       | -2.7400071      | 1.3902345        | 0               | TBC1D15    | NA         | TBC1D15    |
| VIP           | 3.1452416       | 0.72815259       | 0               | VIP        | NA         | VIP        |
| APCDD1        | -2.375738       | 1.25099685       | 0.15408684      | APCDD1     | NA         | APCDD1     |
| BPGM          | -2.4073412      | 1.32814895       | 0.15408684      | BPGM       | NA         | BPGM       |
| C9orf72       | -2.3188655      | 1.25802647       | 0.15408684      | C9orf72    | NA         | C9orf72    |
| DAZ4          | 2.859064        | 0.57365678       | 0.15408684      | DAZ4       | NA         | DAZ4       |
| LOC400657     | -2.6144841      | 1.26930781       | 0.15408684      | LOC400657  | NA         | LOC400657  |
| PZP           | 2.7303672       | 0.75805215       | 0.15408684      | PZP        | NA         | NA         |

|           |            |            |            |           |    |           |
|-----------|------------|------------|------------|-----------|----|-----------|
| TMSB4Y    | 2.7244112  | 0.74036259 | 0.15408684 | TMSB4Y    | NA | NA        |
| PRKAB2    | -2.4229614 | 1.32794586 | 0.15408684 | PRKAB2    | NA | PRKAB2    |
| TOP1      | -2.5863571 | 1.42133876 | 0.15408684 | TOP1      | NA | TOP1      |
| ADPGK     | -2.0753836 | 1.21126407 | 0.52040198 | ADPGK     | NA | ADPGK     |
| ALDH6A1   | -1.9990247 | 1.22934956 | 0.52040198 | ALDH6A1   | NA | ALDH6A1   |
| CA9       | 2.0772529  | 0.71449784 | 0.52040198 | CA9       | NA | CA9       |
| FLJ46321  | 2.44914    | 0.76711204 | 0.52040198 | FLJ46321  | NA | FLJ46321  |
| IFLTD1    | 2.4490002  | 0.75215324 | 0.52040198 | IFLTD1    | NA | IFLTD1    |
| LOC541471 | -2.1699253 | 1.20290734 | 0.52040198 | LOC541471 | NA | LOC541471 |
| MGST2     | -2.1789181 | 1.41626241 | 0.52040198 | MGST2     | NA | MGST2     |
| DULLARD   | 2.3121778  | 0.81341173 | 0.52040198 | DULLARD   | NA | NA        |
| FCGR3B    | -2.1865778 | 1.17965061 | 0.52040198 | FCGR3B    | NA | NA        |
| GH1       | 2.1085009  | 0.82681608 | 0.52040198 | GH1       | NA | NA        |
| HLA-DRB1  | 2.1210444  | 0.68540221 | 0.52040198 | HLA-DRB1  | NA | NA        |
| NEK8      | 2.0962729  | 0.78434452 | 0.52040198 | NEK8      | NA | NA        |
| PARP4     | -2.0216843 | 1.56362627 | 0.52040198 | PARP4     | NA | NA        |
| PCDHA3    | 2.3164964  | 0.74777155 | 0.52040198 | PCDHA3    | NA | NA        |
| SPA17     | 2.2711195  | 0.77403425 | 0.52040198 | SPA17     | NA | NA        |
| TUBG2     | 2.2009254  | 0.7412214  | 0.52040198 | TUBG2     | NA | NA        |
| ORC2L     | -1.9637817 | 1.46302166 | 0.52040198 | ORC2L     | NA | ORC2L     |
| PAX8      | 2.1322173  | 0.81230924 | 0.52040198 | PAX8      | NA | PAX8      |
| TCEA3     | 2.0861038  | 0.79924679 | 0.52040198 | TCEA3     | NA | TCEA3     |
| TMTC2     | -2.1768285 | 1.45902545 | 0.52040198 | TMTC2     | NA | TMTC2     |
| TXNL1     | -1.9519404 | 1.29571028 | 0.52040198 | TXNL1     | NA | TXNL1     |
| ZBBX      | 2.4536853  | 0.74870382 | 0.52040198 | ZBBX      | NA | ZBBX      |

## **HAR only 17vs19 q<0.01**

| <b>SYMBOL</b> | <b>17vs19.d</b> | <b>17vs19.FC</b> | <b>17vs19.q</b> | <b>HAR</b> | <b>CAR</b> | <b>MAR</b> |
|---------------|-----------------|------------------|-----------------|------------|------------|------------|
| GSTT2         | 4.7937351       | 0.46999547       | 0               | GSTT2      | NA         | NA         |
| LOC80154      | 4.1659068       | 0.69723599       | 0               | LOC80154   | NA         | NA         |
| NIPSNAP3A     | 6.4560253       | 0.48119602       | 0               | NIPSNAP3A  | NA         | NA         |
| NLGN4Y        | 11.059543       | 0.23828453       | 0               | NLGN4Y     | NA         | NA         |
| ZFR           | -2.6851191      | 1.38190809       | 0               | ZFR        | NA         | NA         |
| ZNF385D       | -2.6964259      | 1.68972635       | 0               | ZNF385D    | NA         | NA         |
| PZP           | 2.7303672       | 0.75805215       | 0.15408684      | PZP        | NA         | NA         |
| TMSB4Y        | 2.7244112       | 0.74036259       | 0.15408684      | TMSB4Y     | NA         | NA         |
| DULLARD       | 2.3121778       | 0.81341173       | 0.52040198      | DULLARD    | NA         | NA         |
| FCGR3B        | -2.1865778      | 1.17965061       | 0.52040198      | FCGR3B     | NA         | NA         |
| GH1           | 2.1085009       | 0.82681608       | 0.52040198      | GH1        | NA         | NA         |
| HLA-DRB1      | 2.1210444       | 0.68540221       | 0.52040198      | HLA-DRB1   | NA         | NA         |
| NEK8          | 2.0962729       | 0.78434452       | 0.52040198      | NEK8       | NA         | NA         |
| PARP4         | -2.0216843      | 1.56362627       | 0.52040198      | PARP4      | NA         | NA         |
| PCDHA3        | 2.3164964       | 0.74777155       | 0.52040198      | PCDHA3     | NA         | NA         |
| SPA17         | 2.2711195       | 0.77403425       | 0.52040198      | SPA17      | NA         | NA         |
| TUBG2         | 2.2009254       | 0.7412214        | 0.52040198      | TUBG2      | NA         | NA         |

## **CAR 17vs19 q<0.01**

| <b>SYMBOL</b> | <b>17vs19.d</b> | <b>17vs19.FC</b> | <b>17vs19.q</b> | <b>HAR</b> | <b>CAR</b> | <b>MAR</b> |
|---------------|-----------------|------------------|-----------------|------------|------------|------------|
| ALG10         | -4.3960045      | 1.61044113       | 0               | ALG10      | ALG10      | ALG10      |
| CYorf15A      | 4.8826982       | 0.33984058       | 0               | CYorf15A   | CYorf15A   | NA         |
| DAZ3          | 3.1560883       | 0.66021176       | 0               | DAZ3       | DAZ3       | NA         |
| FAM27A        | 3.7260472       | 0.66240645       | 0               | FAM27A     | FAM27A     | FAM27A     |
| FRG1B         | 4.9790263       | 0.53342964       | 0               | FRG1B      | FRG1B      | NA         |
| GPC6          | -2.9574624      | 1.70632811       | 0               | GPC6       | GPC6       | GPC6       |
| KGFLP1        | -6.0498232      | 1.92952432       | 0               | KGFLP1     | KGFLP1     | KGFLP1     |
| LOC645166     | 2.9873503       | 0.70416815       | 0               | LOC645166  | LOC645166  | NA         |
| LOC654342     | 4.2238118       | 0.61249671       | 0               | LOC654342  | LOC654342  | NA         |
| MPDZ          | -3.8035766      | 1.38811298       | 0               | MPDZ       | MPDZ       | MPDZ       |
| MYOM2         | 3.9185099       | 0.60750334       | 0               | MYOM2      | MYOM2      | MYOM2      |
| AHCY          | 3.8216127       | 0.6616698        | 0               | NA         | AHCY       | AHCY       |
| AK3           | -3.9337709      | 1.62834195       | 0               | NA         | AK3        | NA         |
| ALDH1A2       | -2.9144595      | 1.37007936       | 0               | NA         | ALDH1A2    | ALDH1A2    |
| ANXA3         | -3.0609158      | 1.75438391       | 0               | NA         | ANXA3      | ANXA3      |
| ATM           | -2.7124409      | 1.28498678       | 0               | NA         | ATM        | NA         |
| BAG5          | -3.0836664      | 1.41818198       | 0               | NA         | BAG5       | NA         |
| BAT2          | 3.885736        | 0.67498407       | 0               | NA         | BAT2       | NA         |
| C17orf97      | -3.4256608      | 1.89055616       | 0               | NA         | C17orf97   | C17orf97   |
| C20orf111     | -3.2423874      | 1.39343486       | 0               | NA         | C20orf111  | NA         |
| CCL25         | 3.0998658       | 0.73888725       | 0               | NA         | CCL25      | NA         |
| CDH5          | -2.9995755      | 1.29949249       | 0               | NA         | CDH5       | CDH5       |
| CLPTM1        | 3.4364856       | 0.68939056       | 0               | NA         | CLPTM1     | NA         |
| CTXN1         | 3.0496447       | 0.7261724        | 0               | NA         | CTXN1      | NA         |
| DDX12         | 3.2465719       | 0.69927974       | 0               | NA         | DDX12      | NA         |
| DDX3X         | -2.9328472      | 1.28671605       | 0               | NA         | DDX3X      | NA         |
| DDX3Y         | 16.876416       | 0.17718856       | 0               | NA         | DDX3Y      | DDX3Y      |
| DNAJC14       | -2.9630926      | 1.36956381       | 0               | NA         | DNAJC14    | NA         |
| FABP2         | -3.1328576      | 1.50995037       | 0               | NA         | FABP2      | FABP2      |
| FMNL2         | -2.7567558      | 1.43286398       | 0               | NA         | FMNL2      | FMNL2      |
| GJA1          | -3.1733784      | 2.19155709       | 0               | NA         | GJA1       | GJA1       |
| GPR137B       | -2.6931058      | 1.61477917       | 0               | NA         | GPR137B    | NA         |
| HBA1          | -4.1478687      | 2.17084113       | 0               | NA         | HBA1       | HBA1       |
| HBM           | -3.4403808      | 2.1078457        | 0               | NA         | HBM        | HBM        |
| HEATR3        | -3.6981394      | 1.7535573        | 0               | NA         | HEATR3     | HEATR3     |
| LBH           | -3.1891558      | 1.3292535        | 0               | NA         | LBH        | LBH        |
| LMNB1         | -3.4886148      | 1.61615901       | 0               | NA         | LMNB1      | LMNB1      |
| LOC728411     | 3.7763355       | 0.60805245       | 0               | NA         | LOC728411  | LOC728411  |
| LRP1          | 3.4631467       | 0.73756441       | 0               | NA         | LRP1       | LRP1       |
| MAP9          | -5.3005398      | 1.91553803       | 0               | NA         | MAP9       | MAP9       |
| MCM4          | -2.715579       | 1.29650881       | 0               | NA         | MCM4       | MCM4       |
| NPEPPS        | -2.8764258      | 1.23059526       | 0               | NA         | NPEPPS     | NA         |
| OLFML2B       | -2.7124295      | 1.40929775       | 0               | NA         | OLFML2B    | OLFML2B    |
| ORMDL1        | -5.0598578      | 1.60157912       | 0               | NA         | ORMDL1     | NA         |
| PCDH11Y       | 3.3331052       | 0.66928933       | 0               | NA         | PCDH11Y    | PCDH11Y    |
| PCDHA9        | -9.0447639      | 4.22978343       | 0               | NA         | PCDHA9     | NA         |
| PCDHB2        | -3.4170174      | 1.79354433       | 0               | NA         | PCDHB2     | PCDHB2     |
| PEX13         | -4.0700533      | 1.51194967       | 0               | NA         | PEX13      | PEX13      |
| PKD1          | 2.9515426       | 0.77083577       | 0               | NA         | PKD1       | NA         |
| RASGEF1C      | 4.6942403       | 0.6096328        | 0               | NA         | RASGEF1C   | NA         |
| RPN2          | -2.6682219      | 1.21872076       | 0               | NA         | RPN2       | NA         |
| RPS15         | -4.1443443      | 1.46645326       | 0               | NA         | RPS15      | NA         |
| SBDSP         | -2.6680322      | 1.32347965       | 0               | NA         | SBDSP      | NA         |

|              |            |            |            |          |              |           |
|--------------|------------|------------|------------|----------|--------------|-----------|
| SIGIRR       | 5.8151826  | 0.32670657 | 0          | NA       | SIGIRR       | NA        |
| SLC44A1      | -3.7981917 | 1.47477665 | 0          | NA       | SLC44A1      | SLC44A1   |
| SNRNP40      | -3.2647062 | 1.38873481 | 0          | NA       | SNRNP40      | NA        |
| SOX21        | 3.5374339  | 0.65163046 | 0          | NA       | SOX21        | SOX21     |
| SVIL         | -2.9796019 | 1.44575569 | 0          | NA       | SVIL         | SVIL      |
| SYN1         | 3.6477506  | 0.66202785 | 0          | NA       | SYN1         | NA        |
| UTY          | 4.7598996  | 0.58514359 | 0          | NA       | UTY          | NA        |
| VAMP3        | -3.8246818 | 1.30583534 | 0          | NA       | VAMP3        | VAMP3     |
| WDR86        | 3.2488551  | 0.69935269 | 0          | NA       | WDR86        | WDR86     |
| WNK3         | -3.2041129 | 1.50150119 | 0          | NA       | WNK3         | WNK3      |
| ZBTB43       | -2.9867948 | 1.28892076 | 0          | NA       | ZBTB43       | NA        |
| ZC3H4        | -2.9450088 | 1.30078298 | 0          | NA       | ZC3H4        | NA        |
| ZFX          | -2.982037  | 1.46067025 | 0          | NA       | ZFX          | ZFX       |
| ZNF217       | -3.8102481 | 1.65942746 | 0          | NA       | ZNF217       | ZNF217    |
| ZNF580       | 3.355492   | 0.70024099 | 0          | NA       | ZNF580       | NA        |
| ZNF600       | -2.9584113 | 1.45679969 | 0          | NA       | ZNF600       | NA        |
| SDPR         | -3.040839  | 1.4477601  | 0          | SDPR     | SDPR         | SDPR      |
| TTY15        | 16.499994  | 0.04287293 | 0          | TTY15    | TTY15        | TTY15     |
| C7orf28B     | -2.5054821 | 1.33288865 | 0.15408684 | C7orf28B | C7orf28B     | NA        |
| DAZ1         | 2.8255536  | 0.75360375 | 0.15408684 | DAZ1     | DAZ1         | NA        |
| EDNRA        | -2.5143927 | 1.50640502 | 0.15408684 | EDNRA    | EDNRA        | EDNRA     |
| ITIH5        | -2.3664665 | 1.25547418 | 0.15408684 | ITIH5    | ITIH5        | ITIH5     |
| MAP3K7       | -2.3125599 | 1.23669912 | 0.15408684 | MAP3K7   | MAP3K7       | MAP3K7    |
| AKAP12       | -2.2786081 | 1.22442061 | 0.15408684 | NA       | AKAP12       | AKAP12    |
| BGN          | -2.5541739 | 1.24956941 | 0.15408684 | NA       | BGN          | NA        |
| BMPR1B       | 2.6068905  | 0.57627958 | 0.15408684 | NA       | BMPR1B       | BMPR1B    |
| C6orf225     | -2.4203083 | 1.2979177  | 0.15408684 | NA       | C6orf225     | C6orf225  |
| C7orf27      | 2.6845877  | 0.79922567 | 0.15408684 | NA       | C7orf27      | NA        |
| CCL2         | -2.4253942 | 1.60984817 | 0.15408684 | NA       | CCL2         | CCL2      |
| CTNNB1       | -2.3310371 | 1.55618518 | 0.15408684 | NA       | CTNNB1       | CTNNB1    |
| CUL2         | 2.8363592  | 0.7865667  | 0.15408684 | NA       | CUL2         | CUL2      |
| DGKZ         | 2.6512931  | 0.72415923 | 0.15408684 | NA       | DGKZ         | NA        |
| DPY19L2      | -2.3058242 | 1.26838212 | 0.15408684 | NA       | DPY19L2      | DPY19L2   |
| EIF1AX       | -2.2607281 | 1.24915554 | 0.15408684 | NA       | EIF1AX       | EIF1AX    |
| EMCN         | -2.4724299 | 1.31793197 | 0.15408684 | NA       | EMCN         | EMCN      |
| EPB41L1      | -2.5552412 | 1.24069766 | 0.15408684 | NA       | EPB41L1      | EPB41L1   |
| ESCO1        | -2.5615491 | 1.28333929 | 0.15408684 | NA       | ESCO1        | ESCO1     |
| FASTKD2      | -2.439101  | 1.25346273 | 0.15408684 | NA       | FASTKD2      | FASTKD2   |
| GLG1         | -2.5581961 | 1.37991218 | 0.15408684 | NA       | GLG1         | NA        |
| GLRB         | -2.5792542 | 1.28960532 | 0.15408684 | NA       | GLRB         | GLRB      |
| HCCS         | -2.2828589 | 1.20536856 | 0.15408684 | NA       | HCCS         | HCCS      |
| HDDC2        | 2.513864   | 0.71840442 | 0.15408684 | NA       | HDDC2        | HDDC2     |
| HNRNPH1      | -2.281457  | 1.32281047 | 0.15408684 | NA       | HNRNPH1      | NA        |
| HYI          | -2.5821409 | 1.26010427 | 0.15408684 | NA       | HYI          | HYI       |
| KHDRBS2      | -2.310516  | 1.28131427 | 0.15408684 | NA       | KHDRBS2      | KHDRBS2   |
| LHX3         | 2.5309149  | 0.71468102 | 0.15408684 | NA       | LHX3         | NA        |
| LOC100170939 | -2.5776111 | 1.46453322 | 0.15408684 | NA       | LOC100170939 | NA        |
| LOC338758    | -2.632777  | 1.41919053 | 0.15408684 | NA       | LOC338758    | LOC338758 |
| LOC723809    | 2.8695723  | 0.71704125 | 0.15408684 | NA       | LOC723809    | LOC723809 |
| MAPK8IP2     | 2.5229928  | 0.8036034  | 0.15408684 | NA       | MAPK8IP2     | NA        |
| NKAIN2       | -2.4988171 | 1.40672174 | 0.15408684 | NA       | NKAIN2       | NKAIN2    |
| NOVA2        | 2.6609281  | 0.74595138 | 0.15408684 | NA       | NOVA2        | NA        |
| OTUB2        | 2.5639288  | 0.82291476 | 0.15408684 | NA       | OTUB2        | NA        |
| PDSS1        | -2.5214532 | 1.28278209 | 0.15408684 | NA       | PDSS1        | NA        |
| PHB          | -2.3630554 | 1.18715953 | 0.15408684 | NA       | PHB          | PHB       |
| PHF2         | 2.7253249  | 0.72802401 | 0.15408684 | NA       | PHF2         | PHF2      |
| PRPH2        | 2.8264552  | 0.70562354 | 0.15408684 | NA       | PRPH2        | PRPH2     |
| PTCHD2       | 2.5046776  | 0.7152472  | 0.15408684 | NA       | PTCHD2       | NA        |

|              |            |            |            |              |              |           |
|--------------|------------|------------|------------|--------------|--------------|-----------|
| RP9          | -2.5188738 | 1.24645567 | 0.15408684 | NA           | RP9          | RP9       |
| SSR3         | -2.5990322 | 1.35165952 | 0.15408684 | NA           | SSR3         | SSR3      |
| SYPL2        | 2.7515259  | 0.65328867 | 0.15408684 | NA           | SYPL2        | SYPL2     |
| TM7SF4       | 2.6204674  | 0.77172555 | 0.15408684 | NA           | TM7SF4       | TM7SF4    |
| ZNF326       | -2.3209629 | 1.23916508 | 0.15408684 | NA           | ZNF326       | ZNF326    |
| ZNF644       | -2.5407901 | 1.55442586 | 0.15408684 | NA           | ZNF644       | ZNF644    |
| NFU1         | 2.5576059  | 0.78910103 | 0.15408684 | NFU1         | NFU1         | NFU1      |
| NKAIN3       | 2.9072777  | 0.80136794 | 0.15408684 | NKAIN3       | NKAIN3       | NKAIN3    |
| PKN2         | -2.5086486 | 1.30100005 | 0.15408684 | PKN2         | PKN2         | PKN2      |
| PSAT1        | -2.3191814 | 1.22755029 | 0.15408684 | PSAT1        | PSAT1        | PSAT1     |
| TARSL2       | 2.4999564  | 0.80142314 | 0.15408684 | TARSL2       | TARSL2       | NA        |
| WSB1         | -2.3133712 | 1.38965777 | 0.15408684 | WSB1         | WSB1         | WSB1      |
| ATOH1        | 2.1058924  | 0.72609592 | 0.52040198 | ATOH1        | ATOH1        | ATOH1     |
| EFCAB4B      | 2.4987579  | 0.8501656  | 0.52040198 | EFCAB4B      | EFCAB4B      | EFCAB4B   |
| FAM96A       | -1.9027157 | 1.18994558 | 0.52040198 | FAM96A       | FAM96A       | FAM96A    |
| FAT1         | -2.1651627 | 1.28255083 | 0.52040198 | FAT1         | FAT1         | FAT1      |
| FRMD6        | -2.2175814 | 1.30253868 | 0.52040198 | FRMD6        | FRMD6        | FRMD6     |
| KCTD12       | -1.9045931 | 1.28329693 | 0.52040198 | KCTD12       | KCTD12       | KCTD12    |
| KDR          | -2.1881049 | 1.32116515 | 0.52040198 | KDR          | KDR          | KDR       |
| LOC100132832 | 2.3888489  | 0.7146981  | 0.52040198 | LOC100132832 | LOC100132832 | NA        |
| LOC400891    | -1.9715033 | 1.18672323 | 0.52040198 | LOC400891    | LOC400891    | NA        |
| ABCA17P      | 2.3343513  | 0.73624021 | 0.52040198 | NA           | ABCA17P      | ABCA17P   |
| ACTRT2       | 2.4225188  | 0.66197595 | 0.52040198 | NA           | ACTRT2       | NA        |
| APOL1        | -1.9121602 | 1.38224102 | 0.52040198 | NA           | APOL1        | APOL1     |
| ARC          | 2.4962207  | 0.71036984 | 0.52040198 | NA           | ARC          | NA        |
| BMP10        | 2.4111758  | 0.67500925 | 0.52040198 | NA           | BMP10        | NA        |
| C11orf71     | -2.0942639 | 1.19735443 | 0.52040198 | NA           | C11orf71     | NA        |
| C14orf178    | 2.1092287  | 0.78711472 | 0.52040198 | NA           | C14orf178    | C14orf178 |
| C14orf28     | -1.9367375 | 1.22619677 | 0.52040198 | NA           | C14orf28     | NA        |
| C17orf44     | 2.3507042  | 0.66310725 | 0.52040198 | NA           | C17orf44     | NA        |
| C20orf152    | 2.0690105  | 0.81899879 | 0.52040198 | NA           | C20orf152    | NA        |
| C3orf17      | -1.9128026 | 1.21356318 | 0.52040198 | NA           | C3orf17      | C3orf17   |
| C9orf69      | 2.3143464  | 0.81078734 | 0.52040198 | NA           | C9orf69      | NA        |
| CBLN3        | 2.0833671  | 0.78763001 | 0.52040198 | NA           | CBLN3        | NA        |
| CD47         | -1.9775249 | 1.21294482 | 0.52040198 | NA           | CD47         | CD47      |
| CDC42        | 2.1906733  | 0.81494459 | 0.52040198 | NA           | CDC42        | CDC42     |
| CLDN15       | 2.1697741  | 0.83185557 | 0.52040198 | NA           | CLDN15       | NA        |
| CLN5         | -1.9063071 | 1.27256393 | 0.52040198 | NA           | CLN5         | CLN5      |
| COL4A1       | -2.0671428 | 1.22169476 | 0.52040198 | NA           | COL4A1       | COL4A1    |
| COL4A2       | -2.2049807 | 1.18443796 | 0.52040198 | NA           | COL4A2       | NA        |
| COX7B        | -2.1427705 | 1.31349944 | 0.52040198 | NA           | COX7B        | NA        |
| DEXI         | 2.1112593  | 0.83873045 | 0.52040198 | NA           | DEXI         | DEXI      |
| EIF2S3       | -1.9601947 | 1.16509672 | 0.52040198 | NA           | EIF2S3       | EIF2S3    |
| FAM154B      | -2.1218522 | 1.31465336 | 0.52040198 | NA           | FAM154B      | NA        |
| FAM184B      | -2.240609  | 1.19153921 | 0.52040198 | NA           | FAM184B      | NA        |
| FLJ39653     | -2.0964844 | 1.20766404 | 0.52040198 | NA           | FLJ39653     | FLJ39653  |
| GDE1         | -2.1606586 | 1.20437995 | 0.52040198 | NA           | GDE1         | NA        |
| GJA4         | -2.0965789 | 1.16984231 | 0.52040198 | NA           | GJA4         | NA        |
| GNL3L        | -2.0766874 | 1.24010248 | 0.52040198 | NA           | GNL3L        | NA        |
| GPR144       | -2.1131044 | 1.34267311 | 0.52040198 | NA           | GPR144       | NA        |
| HMG20A       | -2.1217093 | 1.21264922 | 0.52040198 | NA           | HMG20A       | NA        |
| HRC          | 2.4465437  | 0.81970352 | 0.52040198 | NA           | HRC          | NA        |
| HS3ST4       | -1.889094  | 1.23721883 | 0.52040198 | NA           | HS3ST4       | HS3ST4    |
| HSDL2        | -1.8965978 | 1.29385895 | 0.52040198 | NA           | HSDL2        | HSDL2     |
| ICOS         | 2.4927746  | 0.75229582 | 0.52040198 | NA           | ICOS         | ICOS      |
| IDH2         | -2.0983052 | 1.21860617 | 0.52040198 | NA           | IDH2         | IDH2      |
| IL13RA2      | 2.4185608  | 0.56894165 | 0.52040198 | NA           | IL13RA2      | NA        |
| KCNA2        | 2.1389919  | 0.81668435 | 0.52040198 | NA           | KCNA2        | NA        |

|              |            |            |            |        |              |              |
|--------------|------------|------------|------------|--------|--------------|--------------|
| KIAA0831     | -2.1327187 | 1.19270868 | 0.52040198 | NA     | KIAA0831     | KIAA0831     |
| KRAS         | -2.1983385 | 1.18710244 | 0.52040198 | NA     | KRAS         | NA           |
| LOC100192378 | 2.4134955  | 0.79027925 | 0.52040198 | NA     | LOC100192378 | LOC100192378 |
| LOC284805    | 2.363168   | 0.70057426 | 0.52040198 | NA     | LOC284805    | NA           |
| MCPH1        | -2.1621202 | 1.1819172  | 0.52040198 | NA     | MCPH1        | MCPH1        |
| MDK          | -1.9152052 | 1.32885191 | 0.52040198 | NA     | MDK          | NA           |
| MKKS         | 2.3111227  | 0.77454001 | 0.52040198 | NA     | MKKS         | MKKS         |
| MPPED1       | -2.0119839 | 1.21751657 | 0.52040198 | NA     | MPPED1       | MPPED1       |
| MTHFS        | -1.9253965 | 1.30214111 | 0.52040198 | NA     | MTHFS        | NA           |
| MXRA5        | -1.9816178 | 1.41499961 | 0.52040198 | NA     | MXRA5        | NA           |
| NPBWR2       | 2.2708493  | 0.75492006 | 0.52040198 | NA     | NPBWR2       | NA           |
| NPDC1        | 2.3806903  | 0.76341094 | 0.52040198 | NA     | NPDC1        | NA           |
| NPIP         | 2.1970509  | 0.81624528 | 0.52040198 | NA     | NPIP         | NA           |
| PAFAH1B2     | -1.8806275 | 1.17625486 | 0.52040198 | NA     | PAFAH1B2     | PAFAH1B2     |
| PCDH11X      | 2.1516949  | 0.84514434 | 0.52040198 | NA     | PCDH11X      | PCDH11X      |
| PCNXL2       | 2.0737151  | 0.79867141 | 0.52040198 | NA     | PCNXL2       | PCNXL2       |
| PDPK1        | -1.8887228 | 1.13758817 | 0.52040198 | NA     | PDPK1        | NA           |
| PEX5L        | -2.1640812 | 1.24539707 | 0.52040198 | NA     | PEX5L        | PEX5L        |
| PREP         | -1.984032  | 1.275789   | 0.52040198 | NA     | PREP         | PREP         |
| PSMC3        | -2.0114918 | 1.21585774 | 0.52040198 | NA     | PSMC3        | NA           |
| PTPN23       | 2.3028472  | 0.82481612 | 0.52040198 | NA     | PTPN23       | NA           |
| RAD1         | -2.1804543 | 1.21625387 | 0.52040198 | NA     | RAD1         | NA           |
| RALGDS       | 2.1173299  | 0.82805109 | 0.52040198 | NA     | RALGDS       | NA           |
| RARA         | 2.487077   | 0.76487883 | 0.52040198 | NA     | RARA         | RARA         |
| RBM42        | 2.2347514  | 0.77108967 | 0.52040198 | NA     | RBM42        | NA           |
| RLTPR        | 2.3650698  | 0.79681502 | 0.52040198 | NA     | RLTPR        | RLTPR        |
| ROBO3        | 2.3069616  | 0.74089878 | 0.52040198 | NA     | ROBO3        | ROBO3        |
| RTN3         | -1.953676  | 1.15159896 | 0.52040198 | NA     | RTN3         | NA           |
| RUFY3        | -1.9157856 | 1.19877545 | 0.52040198 | NA     | RUFY3        | RUFY3        |
| SCNN1D       | 2.2105416  | 0.78447523 | 0.52040198 | NA     | SCNN1D       | NA           |
| SCRN3        | -2.102817  | 1.23760316 | 0.52040198 | NA     | SCRN3        | SCRN3        |
| SFTPD        | 2.3522799  | 0.8057268  | 0.52040198 | NA     | SFTPD        | NA           |
| SIPA1L1      | -2.0250012 | 1.19199125 | 0.52040198 | NA     | SIPA1L1      | SIPA1L1      |
| SLC16A7      | -2.1144529 | 1.4193732  | 0.52040198 | NA     | SLC16A7      | SLC16A7      |
| SLC29A3      | 2.3957502  | 0.77489056 | 0.52040198 | NA     | SLC29A3      | SLC29A3      |
| SS18         | -1.9681358 | 1.22695495 | 0.52040198 | NA     | SS18         | SS18         |
| SSR4         | -1.9712245 | 1.19889846 | 0.52040198 | NA     | SSR4         | NA           |
| SUMF1        | -2.1038277 | 1.21929102 | 0.52040198 | NA     | SUMF1        | SUMF1        |
| SYCE2        | 2.2061146  | 0.75924301 | 0.52040198 | NA     | SYCE2        | NA           |
| TCAP         | -1.9631978 | 1.25541931 | 0.52040198 | NA     | TCAP         | NA           |
| TEX28        | 2.2745937  | 0.75567848 | 0.52040198 | NA     | TEX28        | NA           |
| TFDP3        | 2.2307515  | 0.76327553 | 0.52040198 | NA     | TFDP3        | TFDP3        |
| TIAF1        | 2.059115   | 0.83706419 | 0.52040198 | NA     | TIAF1        | NA           |
| TM4SF18      | -1.8990657 | 1.3332277  | 0.52040198 | NA     | TM4SF18      | NA           |
| TMCC1        | -1.975072  | 1.16245899 | 0.52040198 | NA     | TMCC1        | TMCC1        |
| TMEM106B     | -2.0505189 | 1.30611139 | 0.52040198 | NA     | TMEM106B     | TMEM106B     |
| TMEM187      | -1.9812326 | 1.30434616 | 0.52040198 | NA     | TMEM187      | NA           |
| TTC39B       | -2.1480051 | 1.21699674 | 0.52040198 | NA     | TTC39B       | TTC39B       |
| USP39        | -2.1130153 | 1.22255532 | 0.52040198 | NA     | USP39        | NA           |
| VGLL3        | -1.8927667 | 1.23418995 | 0.52040198 | NA     | VGLL3        | VGLL3        |
| VRK1         | -2.0220907 | 1.19558435 | 0.52040198 | NA     | VRK1         | VRK1         |
| WDR6         | 2.2784428  | 0.79289306 | 0.52040198 | NA     | WDR6         | NA           |
| XIAP         | -1.9443922 | 1.16880732 | 0.52040198 | NA     | XIAP         | XIAP         |
| ZNF155       | -2.0373414 | 1.22108449 | 0.52040198 | NA     | ZNF155       | NA           |
| NHLH2        | -1.9479143 | 1.31275162 | 0.52040198 | NHLH2  | NHLH2        | NA           |
| PLXNA2       | -1.9743795 | 1.4904532  | 0.52040198 | PLXNA2 | PLXNA2       | PLXNA2       |
| TLE4         | -2.2209082 | 1.42075177 | 0.52040198 | TLE4   | TLE4         | TLE4         |

|        |            |            |            |        |        |    |
|--------|------------|------------|------------|--------|--------|----|
| ZNF200 | -2.1070827 | 1.20967709 | 0.52040198 | ZNF200 | ZNF200 | NA |
|--------|------------|------------|------------|--------|--------|----|

## **CAR-HAR 17vs19 q<0.01**

| <b>SYMBOL</b> | <b>17vs19.d</b> | <b>17vs19.FC</b> | <b>17vs19.q</b> | <b>HAR</b> | <b>CAR</b> | <b>MAR</b> |
|---------------|-----------------|------------------|-----------------|------------|------------|------------|
| AHCY          | 3.8216127       | 0.6616698        | 0               | NA         | AHCY       | AHCY       |
| ALDH1A2       | -2.9144595      | 1.37007936       | 0               | NA         | ALDH1A2    | ALDH1A2    |
| ANXA3         | -3.0609158      | 1.75438391       | 0               | NA         | ANXA3      | ANXA3      |
| C17orf97      | -3.4256608      | 1.89055616       | 0               | NA         | C17orf97   | C17orf97   |
| CDH5          | -2.9995755      | 1.29949249       | 0               | NA         | CDH5       | CDH5       |
| DDX3Y         | 16.876416       | 0.17718856       | 0               | NA         | DDX3Y      | DDX3Y      |
| FABP2         | -3.1328576      | 1.50995037       | 0               | NA         | FABP2      | FABP2      |
| FMNL2         | -2.7567558      | 1.43286398       | 0               | NA         | FMNL2      | FMNL2      |
| GJA1          | -3.1733784      | 2.19155709       | 0               | NA         | GJA1       | GJA1       |
| HBA1          | -4.1478687      | 2.17084113       | 0               | NA         | HBA1       | HBA1       |
| HBM           | -3.4403808      | 2.1078457        | 0               | NA         | HBM        | HBM        |
| HEATR3        | -3.6981394      | 1.7535573        | 0               | NA         | HEATR3     | HEATR3     |
| LBH           | -3.1891558      | 1.3292535        | 0               | NA         | LBH        | LBH        |
| LMNB1         | -3.4886148      | 1.61615901       | 0               | NA         | LMNB1      | LMNB1      |
| LOC728411     | 3.7763355       | 0.60805245       | 0               | NA         | LOC728411  | LOC728411  |
| LRP1          | 3.4631467       | 0.73756441       | 0               | NA         | LRP1       | LRP1       |
| MAP9          | -5.3005398      | 1.91553803       | 0               | NA         | MAP9       | MAP9       |
| MCM4          | -2.715579       | 1.29650881       | 0               | NA         | MCM4       | MCM4       |
| AK3           | -3.9337709      | 1.62834195       | 0               | NA         | AK3        | NA         |
| ATM           | -2.7124409      | 1.28498678       | 0               | NA         | ATM        | NA         |
| BAG5          | -3.0836664      | 1.41818198       | 0               | NA         | BAG5       | NA         |
| BAT2          | 3.885736        | 0.67498407       | 0               | NA         | BAT2       | NA         |
| C20orf111     | -3.2423874      | 1.39343486       | 0               | NA         | C20orf111  | NA         |
| CCL25         | 3.0998658       | 0.73888725       | 0               | NA         | CCL25      | NA         |
| CLPTM1        | 3.4364856       | 0.68939056       | 0               | NA         | CLPTM1     | NA         |
| CTXN1         | 3.0496447       | 0.7261724        | 0               | NA         | CTXN1      | NA         |
| DDX12         | 3.2465719       | 0.69927974       | 0               | NA         | DDX12      | NA         |
| DDX3X         | -2.9328472      | 1.28671605       | 0               | NA         | DDX3X      | NA         |
| DNAJC14       | -2.9630926      | 1.36956381       | 0               | NA         | DNAJC14    | NA         |
| GPR137B       | -2.6931058      | 1.61477917       | 0               | NA         | GPR137B    | NA         |
| NPEPPS        | -2.8764258      | 1.23059526       | 0               | NA         | NPEPPS     | NA         |
| ORMDL1        | -5.0598578      | 1.60157912       | 0               | NA         | ORMDL1     | NA         |
| PCDHA9        | -9.0447639      | 4.22978343       | 0               | NA         | PCDHA9     | NA         |
| PKD1          | 2.9515426       | 0.77083577       | 0               | NA         | PKD1       | NA         |
| RASGEF1C      | 4.6942403       | 0.6096328        | 0               | NA         | RASGEF1C   | NA         |
| RPN2          | -2.6682219      | 1.21872076       | 0               | NA         | RPN2       | NA         |
| RPS15         | -4.1443443      | 1.46645326       | 0               | NA         | RPS15      | NA         |
| SBDSP         | -2.6680322      | 1.32347965       | 0               | NA         | SBDSP      | NA         |
| SIGIRR        | 5.8151826       | 0.32670657       | 0               | NA         | SIGIRR     | NA         |
| SNRNP40       | -3.2647062      | 1.38873481       | 0               | NA         | SNRNP40    | NA         |
| SYN1          | 3.6477506       | 0.66202785       | 0               | NA         | SYN1       | NA         |
| UTY           | 4.7598996       | 0.58514359       | 0               | NA         | UTY        | NA         |
| ZBTB43        | -2.9867948      | 1.28892076       | 0               | NA         | ZBTB43     | NA         |
| ZC3H4         | -2.9450088      | 1.30078298       | 0               | NA         | ZC3H4      | NA         |
| ZNF580        | 3.355492        | 0.70024099       | 0               | NA         | ZNF580     | NA         |
| ZNF600        | -2.9584113      | 1.45679969       | 0               | NA         | ZNF600     | NA         |
| OLFML2B       | -2.7124295      | 1.40929775       | 0               | NA         | OLFML2B    | OLFML2B    |
| PCDH11Y       | 3.3331052       | 0.66928933       | 0               | NA         | PCDH11Y    | PCDH11Y    |
| PCDHB2        | -3.4170174      | 1.79354433       | 0               | NA         | PCDHB2     | PCDHB2     |

|              |            |            |            |    |              |           |
|--------------|------------|------------|------------|----|--------------|-----------|
| PEX13        | -4.0700533 | 1.51194967 | 0          | NA | PEX13        | PEX13     |
| SLC44A1      | -3.7981917 | 1.47477665 | 0          | NA | SLC44A1      | SLC44A1   |
| SOX21        | 3.5374339  | 0.65163046 | 0          | NA | SOX21        | SOX21     |
| SVIL         | -2.9796019 | 1.44575569 | 0          | NA | SVIL         | SVIL      |
| VAMP3        | -3.8246818 | 1.30583534 | 0          | NA | VAMP3        | VAMP3     |
| WDR86        | 3.2488551  | 0.69935269 | 0          | NA | WDR86        | WDR86     |
| WNK3         | -3.2041129 | 1.50150119 | 0          | NA | WNK3         | WNK3      |
| ZFX          | -2.982037  | 1.46067025 | 0          | NA | ZFX          | ZFX       |
| ZNF217       | -3.8102481 | 1.65942746 | 0          | NA | ZNF217       | ZNF217    |
| AKAP12       | -2.2786081 | 1.22442061 | 0.15408684 | NA | AKAP12       | AKAP12    |
| BMPR1B       | 2.6068905  | 0.57627958 | 0.15408684 | NA | BMPR1B       | BMPR1B    |
| C6orf225     | -2.4203083 | 1.2979177  | 0.15408684 | NA | C6orf225     | C6orf225  |
| CCL2         | -2.4253942 | 1.60984817 | 0.15408684 | NA | CCL2         | CCL2      |
| CTNNB1       | -2.3310371 | 1.55618518 | 0.15408684 | NA | CTNNB1       | CTNNB1    |
| CUL2         | 2.8363592  | 0.7865667  | 0.15408684 | NA | CUL2         | CUL2      |
| DPY19L2      | -2.3058242 | 1.26838212 | 0.15408684 | NA | DPY19L2      | DPY19L2   |
| EIF1AX       | -2.2607281 | 1.24915554 | 0.15408684 | NA | EIF1AX       | EIF1AX    |
| EMCN         | -2.4724299 | 1.31793197 | 0.15408684 | NA | EMCN         | EMCN      |
| EPB41L1      | -2.5552412 | 1.24069766 | 0.15408684 | NA | EPB41L1      | EPB41L1   |
| ESCO1        | -2.5615491 | 1.28333929 | 0.15408684 | NA | ESCO1        | ESCO1     |
| FASTKD2      | -2.439101  | 1.25346273 | 0.15408684 | NA | FASTKD2      | FASTKD2   |
| GLRB         | -2.5792542 | 1.28960532 | 0.15408684 | NA | GLRB         | GLRB      |
| HCCS         | -2.2828589 | 1.20536856 | 0.15408684 | NA | HCCS         | HCCS      |
| HDDC2        | 2.513864   | 0.71840442 | 0.15408684 | NA | HDDC2        | HDDC2     |
| HYI          | -2.5821409 | 1.26010427 | 0.15408684 | NA | HYI          | HYI       |
| KHDRBS2      | -2.310516  | 1.28131427 | 0.15408684 | NA | KHDRBS2      | KHDRBS2   |
| LOC338758    | -2.632777  | 1.41919053 | 0.15408684 | NA | LOC338758    | LOC338758 |
| LOC723809    | 2.8695723  | 0.71704125 | 0.15408684 | NA | LOC723809    | LOC723809 |
| BGN          | -2.5541739 | 1.24956941 | 0.15408684 | NA | BGN          | NA        |
| C7orf27      | 2.6845877  | 0.79922567 | 0.15408684 | NA | C7orf27      | NA        |
| DGKZ         | 2.6512931  | 0.72415923 | 0.15408684 | NA | DGKZ         | NA        |
| GLG1         | -2.5581961 | 1.37991218 | 0.15408684 | NA | GLG1         | NA        |
| HNRNPH1      | -2.281457  | 1.32281047 | 0.15408684 | NA | HNRNPH1      | NA        |
| LHX3         | 2.5309149  | 0.71468102 | 0.15408684 | NA | LHX3         | NA        |
| LOC100170939 | -2.5776111 | 1.46453322 | 0.15408684 | NA | LOC100170939 | NA        |
| MAPK8IP2     | 2.5229928  | 0.8036034  | 0.15408684 | NA | MAPK8IP2     | NA        |
| NOVA2        | 2.6609281  | 0.74595138 | 0.15408684 | NA | NOVA2        | NA        |
| OTUB2        | 2.5639288  | 0.82291476 | 0.15408684 | NA | OTUB2        | NA        |
| PDSS1        | -2.5214532 | 1.28278209 | 0.15408684 | NA | PDSS1        | NA        |
| PTCHD2       | 2.5046776  | 0.7152472  | 0.15408684 | NA | PTCHD2       | NA        |
| NKAIN2       | -2.4988171 | 1.40672174 | 0.15408684 | NA | NKAIN2       | NKAIN2    |
| PHB          | -2.3630554 | 1.18715953 | 0.15408684 | NA | PHB          | PHB       |
| PHF2         | 2.7253249  | 0.72802401 | 0.15408684 | NA | PHF2         | PHF2      |
| PRPH2        | 2.8264552  | 0.70562354 | 0.15408684 | NA | PRPH2        | PRPH2     |
| RP9          | -2.5188738 | 1.24645567 | 0.15408684 | NA | RP9          | RP9       |
| SSR3         | -2.5990322 | 1.35165952 | 0.15408684 | NA | SSR3         | SSR3      |
| SYPL2        | 2.7515259  | 0.65328867 | 0.15408684 | NA | SYPL2        | SYPL2     |
| TM7SF4       | 2.6204674  | 0.77172555 | 0.15408684 | NA | TM7SF4       | TM7SF4    |
| ZNF326       | -2.3209629 | 1.23916508 | 0.15408684 | NA | ZNF326       | ZNF326    |
| ZNF644       | -2.5407901 | 1.55442586 | 0.15408684 | NA | ZNF644       | ZNF644    |
| ABCA17P      | 2.3343513  | 0.73624021 | 0.52040198 | NA | ABCA17P      | ABCA17P   |
| APOL1        | -1.9121602 | 1.38224102 | 0.52040198 | NA | APOL1        | APOL1     |
| C14orf178    | 2.1092287  | 0.78711472 | 0.52040198 | NA | C14orf178    | C14orf178 |
| C3orf17      | -1.9128026 | 1.21356318 | 0.52040198 | NA | C3orf17      | C3orf17   |
| CD47         | -1.9775249 | 1.21294482 | 0.52040198 | NA | CD47         | CD47      |
| CDC42        | 2.1906733  | 0.81494459 | 0.52040198 | NA | CDC42        | CDC42     |
| CLN5         | -1.9063071 | 1.27256393 | 0.52040198 | NA | CLN5         | CLN5      |
| COL4A1       | -2.0671428 | 1.22169476 | 0.52040198 | NA | COL4A1       | COL4A1    |



|              |            |            |            |    |              |              |
|--------------|------------|------------|------------|----|--------------|--------------|
| DEXI         | 2.1112593  | 0.83873045 | 0.52040198 | NA | DEXI         | DEXI         |
| EIF2S3       | -1.9601947 | 1.16509672 | 0.52040198 | NA | EIF2S3       | EIF2S3       |
| FLJ39653     | -2.0964844 | 1.20766404 | 0.52040198 | NA | FLJ39653     | FLJ39653     |
| HS3ST4       | -1.889094  | 1.23721883 | 0.52040198 | NA | HS3ST4       | HS3ST4       |
| HSDL2        | -1.8965978 | 1.29385895 | 0.52040198 | NA | HSDL2        | HSDL2        |
| ICOS         | 2.4927746  | 0.75229582 | 0.52040198 | NA | ICOS         | ICOS         |
| IDH2         | -2.0983052 | 1.21860617 | 0.52040198 | NA | IDH2         | IDH2         |
| KIAA0831     | -2.1327187 | 1.19270868 | 0.52040198 | NA | KIAA0831     | KIAA0831     |
| LOC100192378 | 2.4134955  | 0.79027925 | 0.52040198 | NA | LOC100192378 | LOC100192378 |
| MCPH1        | -2.1621202 | 1.1819172  | 0.52040198 | NA | MCPH1        | MCPH1        |
| MKKS         | 2.3111227  | 0.77454001 | 0.52040198 | NA | MKKS         | MKKS         |
| MPPED1       | -2.0119839 | 1.21751657 | 0.52040198 | NA | MPPED1       | MPPED1       |
| ACTRT2       | 2.4225188  | 0.66197595 | 0.52040198 | NA | ACTRT2       | NA           |
| ARC          | 2.4962207  | 0.71036984 | 0.52040198 | NA | ARC          | NA           |
| BMP10        | 2.4111758  | 0.67500925 | 0.52040198 | NA | BMP10        | NA           |
| C11orf71     | -2.0942639 | 1.19735443 | 0.52040198 | NA | C11orf71     | NA           |
| C14orf28     | -1.9367375 | 1.22619677 | 0.52040198 | NA | C14orf28     | NA           |
| C17orf44     | 2.3507042  | 0.66310725 | 0.52040198 | NA | C17orf44     | NA           |
| C20orf152    | 2.0690105  | 0.81899879 | 0.52040198 | NA | C20orf152    | NA           |
| C9orf69      | 2.3143464  | 0.81078734 | 0.52040198 | NA | C9orf69      | NA           |
| CBLN3        | 2.0833671  | 0.78763001 | 0.52040198 | NA | CBLN3        | NA           |
| CLDN15       | 2.1697741  | 0.83185557 | 0.52040198 | NA | CLDN15       | NA           |
| COL4A2       | -2.2049807 | 1.18443796 | 0.52040198 | NA | COL4A2       | NA           |
| COX7B        | -2.1427705 | 1.31349944 | 0.52040198 | NA | COX7B        | NA           |
| FAM154B      | -2.1218522 | 1.31465336 | 0.52040198 | NA | FAM154B      | NA           |
| FAM184B      | -2.240609  | 1.19153921 | 0.52040198 | NA | FAM184B      | NA           |
| GDE1         | -2.1606586 | 1.20437995 | 0.52040198 | NA | GDE1         | NA           |
| GJA4         | -2.0965789 | 1.16984231 | 0.52040198 | NA | GJA4         | NA           |
| GNL3L        | -2.0766874 | 1.24010248 | 0.52040198 | NA | GNL3L        | NA           |
| GPR144       | -2.1131044 | 1.34267311 | 0.52040198 | NA | GPR144       | NA           |
| HMG20A       | -2.1217093 | 1.21264922 | 0.52040198 | NA | HMG20A       | NA           |
| HRC          | 2.4465437  | 0.81970352 | 0.52040198 | NA | HRC          | NA           |
| IL13RA2      | 2.4185608  | 0.56894165 | 0.52040198 | NA | IL13RA2      | NA           |
| KCNA2        | 2.1389919  | 0.81668435 | 0.52040198 | NA | KCNA2        | NA           |
| KRAS         | -2.1983385 | 1.18710244 | 0.52040198 | NA | KRAS         | NA           |
| LOC284805    | 2.363168   | 0.70057426 | 0.52040198 | NA | LOC284805    | NA           |
| MDK          | -1.9152052 | 1.32885191 | 0.52040198 | NA | MDK          | NA           |
| MTHFS        | -1.9253965 | 1.30214111 | 0.52040198 | NA | MTHFS        | NA           |
| MXRA5        | -1.9816178 | 1.41499961 | 0.52040198 | NA | MXRA5        | NA           |
| NPBWR2       | 2.2708493  | 0.75492006 | 0.52040198 | NA | NPBWR2       | NA           |
| NPDC1        | 2.3806903  | 0.76341094 | 0.52040198 | NA | NPDC1        | NA           |
| NPIP         | 2.1970509  | 0.81624528 | 0.52040198 | NA | NPIP         | NA           |
| PDPK1        | -1.8887228 | 1.13758817 | 0.52040198 | NA | PDPK1        | NA           |
| PSMC3        | -2.0114918 | 1.21585774 | 0.52040198 | NA | PSMC3        | NA           |
| PTPN23       | 2.3028472  | 0.82481612 | 0.52040198 | NA | PTPN23       | NA           |
| RAD1         | -2.1804543 | 1.21625387 | 0.52040198 | NA | RAD1         | NA           |
| RALGDS       | 2.1173299  | 0.82805109 | 0.52040198 | NA | RALGDS       | NA           |
| RBM42        | 2.2347514  | 0.77108967 | 0.52040198 | NA | RBM42        | NA           |
| RTN3         | -1.953676  | 1.15159896 | 0.52040198 | NA | RTN3         | NA           |
| SCNN1D       | 2.2105416  | 0.78447523 | 0.52040198 | NA | SCNN1D       | NA           |
| SFTPD        | 2.3522799  | 0.8057268  | 0.52040198 | NA | SFTPD        | NA           |
| SSR4         | -1.9712245 | 1.19889846 | 0.52040198 | NA | SSR4         | NA           |
| SYCE2        | 2.2061146  | 0.75924301 | 0.52040198 | NA | SYCE2        | NA           |
| TCAP         | -1.9631978 | 1.25541931 | 0.52040198 | NA | TCAP         | NA           |
| TEX28        | 2.2745937  | 0.75567848 | 0.52040198 | NA | TEX28        | NA           |
| TIAF1        | 2.059115   | 0.83706419 | 0.52040198 | NA | TIAF1        | NA           |
| TM4SF18      | -1.8990657 | 1.3332277  | 0.52040198 | NA | TM4SF18      | NA           |

|          |            |            |            |    |          |          |
|----------|------------|------------|------------|----|----------|----------|
| TMEM187  | -1.9812326 | 1.30434616 | 0.52040198 | NA | TMEM187  | NA       |
| USP39    | -2.1130153 | 1.22255532 | 0.52040198 | NA | USP39    | NA       |
| WDR6     | 2.2784428  | 0.79289306 | 0.52040198 | NA | WDR6     | NA       |
| ZNF155   | -2.0373414 | 1.22108449 | 0.52040198 | NA | ZNF155   | NA       |
| PAFAH1B2 | -1.8806275 | 1.17625486 | 0.52040198 | NA | PAFAH1B2 | PAFAH1B2 |
| PCDH11X  | 2.1516949  | 0.84514434 | 0.52040198 | NA | PCDH11X  | PCDH11X  |
| PCNXL2   | 2.0737151  | 0.79867141 | 0.52040198 | NA | PCNXL2   | PCNXL2   |
| PEX5L    | -2.1640812 | 1.24539707 | 0.52040198 | NA | PEX5L    | PEX5L    |
| PREP     | -1.984032  | 1.275789   | 0.52040198 | NA | PREP     | PREP     |
| RARA     | 2.487077   | 0.76487883 | 0.52040198 | NA | RARA     | RARA     |
| RLTPR    | 2.3650698  | 0.79681502 | 0.52040198 | NA | RLTPR    | RLTPR    |
| ROBO3    | 2.3069616  | 0.74089878 | 0.52040198 | NA | ROBO3    | ROBO3    |
| RUFY3    | -1.9157856 | 1.19877545 | 0.52040198 | NA | RUFY3    | RUFY3    |
| SCRN3    | -2.102817  | 1.23760316 | 0.52040198 | NA | SCRN3    | SCRN3    |
| SIPA1L1  | -2.0250012 | 1.19199125 | 0.52040198 | NA | SIPA1L1  | SIPA1L1  |
| SLC16A7  | -2.1144529 | 1.4193732  | 0.52040198 | NA | SLC16A7  | SLC16A7  |
| SLC29A3  | 2.3957502  | 0.77489056 | 0.52040198 | NA | SLC29A3  | SLC29A3  |
| SS18     | -1.9681358 | 1.22695495 | 0.52040198 | NA | SS18     | SS18     |
| SUMF1    | -2.1038277 | 1.21929102 | 0.52040198 | NA | SUMF1    | SUMF1    |
| TFDP3    | 2.2307515  | 0.76327553 | 0.52040198 | NA | TFDP3    | TFDP3    |
| TMCC1    | -1.975072  | 1.16245899 | 0.52040198 | NA | TMCC1    | TMCC1    |
| TMEM106B | -2.0505189 | 1.30611139 | 0.52040198 | NA | TMEM106B | TMEM106B |
| TTC39B   | -2.1480051 | 1.21699674 | 0.52040198 | NA | TTC39B   | TTC39B   |
| VGLL3    | -1.8927667 | 1.23418995 | 0.52040198 | NA | VGLL3    | VGLL3    |
| VRK1     | -2.0220907 | 1.19558435 | 0.52040198 | NA | VRK1     | VRK1     |
| XIAP     | -1.9443922 | 1.16880732 | 0.52040198 | NA | XIAP     | XIAP     |

### **CAR only 17vs19 q<0.01**

| <b>SYMBOL</b> | <b>17vs19.d</b> | <b>17vs19.FC</b> | <b>17vs19.q</b> | <b>HAR</b> | <b>CAR</b> | <b>MAR</b> |
|---------------|-----------------|------------------|-----------------|------------|------------|------------|
| AK3           | -3.9337709      | 1.62834195       | 0               | NA         | AK3        | NA         |
| ATM           | -2.7124409      | 1.28498678       | 0               | NA         | ATM        | NA         |
| BAG5          | -3.0836664      | 1.41818198       | 0               | NA         | BAG5       | NA         |
| BAT2          | 3.885736        | 0.67498407       | 0               | NA         | BAT2       | NA         |
| C20orf111     | -3.2423874      | 1.39343486       | 0               | NA         | C20orf111  | NA         |
| CCL25         | 3.0998658       | 0.73888725       | 0               | NA         | CCL25      | NA         |
| CLPTM1        | 3.4364856       | 0.68939056       | 0               | NA         | CLPTM1     | NA         |
| CTXN1         | 3.0496447       | 0.7261724        | 0               | NA         | CTXN1      | NA         |
| DDX12         | 3.2465719       | 0.69927974       | 0               | NA         | DDX12      | NA         |
| DDX3X         | -2.9328472      | 1.28671605       | 0               | NA         | DDX3X      | NA         |
| DNAJC14       | -2.9630926      | 1.36956381       | 0               | NA         | DNAJC14    | NA         |
| GPR137B       | -2.6931058      | 1.61477917       | 0               | NA         | GPR137B    | NA         |
| NPEPPS        | -2.8764258      | 1.23059526       | 0               | NA         | NPEPPS     | NA         |
| ORMDL1        | -5.0598578      | 1.60157912       | 0               | NA         | ORMDL1     | NA         |
| PCDHA9        | -9.0447639      | 4.22978343       | 0               | NA         | PCDHA9     | NA         |
| PKD1          | 2.9515426       | 0.77083577       | 0               | NA         | PKD1       | NA         |
| RASGEF1C      | 4.6942403       | 0.6096328        | 0               | NA         | RASGEF1C   | NA         |
| RPN2          | -2.6682219      | 1.21872076       | 0               | NA         | RPN2       | NA         |
| RPS15         | -4.1443443      | 1.46645326       | 0               | NA         | RPS15      | NA         |
| SBDSP         | -2.6680322      | 1.32347965       | 0               | NA         | SBDSP      | NA         |
| SIGIRR        | 5.8151826       | 0.32670657       | 0               | NA         | SIGIRR     | NA         |
| SNRNP40       | -3.2647062      | 1.38873481       | 0               | NA         | SNRNP40    | NA         |
| SYN1          | 3.6477506       | 0.66202785       | 0               | NA         | SYN1       | NA         |
| UTY           | 4.7598996       | 0.58514359       | 0               | NA         | UTY        | NA         |

|              |            |            |            |    |              |    |
|--------------|------------|------------|------------|----|--------------|----|
| ZBTB43       | -2.9867948 | 1.28892076 | 0          | NA | ZBTB43       | NA |
| ZC3H4        | -2.9450088 | 1.30078298 | 0          | NA | ZC3H4        | NA |
| ZNF580       | 3.355492   | 0.70024099 | 0          | NA | ZNF580       | NA |
| ZNF600       | -2.9584113 | 1.45679969 | 0          | NA | ZNF600       | NA |
| BGN          | -2.5541739 | 1.24956941 | 0.15408684 | NA | BGN          | NA |
| C7orf27      | 2.6845877  | 0.79922567 | 0.15408684 | NA | C7orf27      | NA |
| DGKZ         | 2.6512931  | 0.72415923 | 0.15408684 | NA | DGKZ         | NA |
| GLG1         | -2.5581961 | 1.37991218 | 0.15408684 | NA | GLG1         | NA |
| HNRNPH1      | -2.281457  | 1.32281047 | 0.15408684 | NA | HNRNPH1      | NA |
| LHX3         | 2.5309149  | 0.71468102 | 0.15408684 | NA | LHX3         | NA |
| LOC100170939 | -2.5776111 | 1.46453322 | 0.15408684 | NA | LOC100170939 | NA |
| MAPK8IP2     | 2.5229928  | 0.8036034  | 0.15408684 | NA | MAPK8IP2     | NA |
| NOVA2        | 2.6609281  | 0.74595138 | 0.15408684 | NA | NOVA2        | NA |
| OTUB2        | 2.5639288  | 0.82291476 | 0.15408684 | NA | OTUB2        | NA |
| PDSS1        | -2.5214532 | 1.28278209 | 0.15408684 | NA | PDSS1        | NA |
| PTCHD2       | 2.5046776  | 0.7152472  | 0.15408684 | NA | PTCHD2       | NA |
| ACTRT2       | 2.4225188  | 0.66197595 | 0.52040198 | NA | ACTRT2       | NA |
| ARC          | 2.4962207  | 0.71036984 | 0.52040198 | NA | ARC          | NA |
| BMP10        | 2.4111758  | 0.67500925 | 0.52040198 | NA | BMP10        | NA |
| C11orf71     | -2.0942639 | 1.19735443 | 0.52040198 | NA | C11orf71     | NA |
| C14orf28     | -1.9367375 | 1.22619677 | 0.52040198 | NA | C14orf28     | NA |
| C17orf44     | 2.3507042  | 0.66310725 | 0.52040198 | NA | C17orf44     | NA |
| C20orf152    | 2.0690105  | 0.81899879 | 0.52040198 | NA | C20orf152    | NA |
| C9orf69      | 2.3143464  | 0.81078734 | 0.52040198 | NA | C9orf69      | NA |
| CBLN3        | 2.0833671  | 0.78763001 | 0.52040198 | NA | CBLN3        | NA |
| CLDN15       | 2.1697741  | 0.83185557 | 0.52040198 | NA | CLDN15       | NA |
| COL4A2       | -2.2049807 | 1.18443796 | 0.52040198 | NA | COL4A2       | NA |
| COX7B        | -2.1427705 | 1.31349944 | 0.52040198 | NA | COX7B        | NA |
| FAM154B      | -2.1218522 | 1.31465336 | 0.52040198 | NA | FAM154B      | NA |
| FAM184B      | -2.240609  | 1.19153921 | 0.52040198 | NA | FAM184B      | NA |
| GDE1         | -2.1606586 | 1.20437995 | 0.52040198 | NA | GDE1         | NA |
| GJA4         | -2.0965789 | 1.16984231 | 0.52040198 | NA | GJA4         | NA |
| GNL3L        | -2.0766874 | 1.24010248 | 0.52040198 | NA | GNL3L        | NA |
| GPR144       | -2.1131044 | 1.34267311 | 0.52040198 | NA | GPR144       | NA |
| HMG20A       | -2.1217093 | 1.21264922 | 0.52040198 | NA | HMG20A       | NA |
| HRC          | 2.4465437  | 0.81970352 | 0.52040198 | NA | HRC          | NA |
| IL13RA2      | 2.4185608  | 0.56894165 | 0.52040198 | NA | IL13RA2      | NA |
| KCNA2        | 2.1389919  | 0.81668435 | 0.52040198 | NA | KCNA2        | NA |
| KRAS         | -2.1983385 | 1.18710244 | 0.52040198 | NA | KRAS         | NA |
| LOC284805    | 2.363168   | 0.70057426 | 0.52040198 | NA | LOC284805    | NA |
| MDK          | -1.9152052 | 1.32885191 | 0.52040198 | NA | MDK          | NA |
| MTHFS        | -1.9253965 | 1.30214111 | 0.52040198 | NA | MTHFS        | NA |
| MXRA5        | -1.9816178 | 1.41499961 | 0.52040198 | NA | MXRA5        | NA |
| NPBWR2       | 2.2708493  | 0.75492006 | 0.52040198 | NA | NPBWR2       | NA |
| NPDC1        | 2.3806903  | 0.76341094 | 0.52040198 | NA | NPDC1        | NA |
| NPIP         | 2.1970509  | 0.81624528 | 0.52040198 | NA | NPIP         | NA |
| PDPK1        | -1.8887228 | 1.13758817 | 0.52040198 | NA | PDPK1        | NA |
| PSMC3        | -2.0114918 | 1.21585774 | 0.52040198 | NA | PSMC3        | NA |
| PTPN23       | 2.3028472  | 0.82481612 | 0.52040198 | NA | PTPN23       | NA |
| RAD1         | -2.1804543 | 1.21625387 | 0.52040198 | NA | RAD1         | NA |
| RALGDS       | 2.1173299  | 0.82805109 | 0.52040198 | NA | RALGDS       | NA |
| RBM42        | 2.2347514  | 0.77108967 | 0.52040198 | NA | RBM42        | NA |
| RTN3         | -1.953676  | 1.15159896 | 0.52040198 | NA | RTN3         | NA |
| SCNN1D       | 2.2105416  | 0.78447523 | 0.52040198 | NA | SCNN1D       | NA |
| SFTPD        | 2.3522799  | 0.8057268  | 0.52040198 | NA | SFTPD        | NA |
| SSR4         | -1.9712245 | 1.19889846 | 0.52040198 | NA | SSR4         | NA |
| SYCE2        | 2.2061146  | 0.75924301 | 0.52040198 | NA | SYCE2        | NA |
| TCAP         | -1.9631978 | 1.25541931 | 0.52040198 | NA | TCAP         | NA |

|         |            |            |            |    |         |    |
|---------|------------|------------|------------|----|---------|----|
| TEX28   | 2.2745937  | 0.75567848 | 0.52040198 | NA | TEX28   | NA |
| TIAF1   | 2.059115   | 0.83706419 | 0.52040198 | NA | TIAF1   | NA |
| TM4SF18 | -1.8990657 | 1.3332277  | 0.52040198 | NA | TM4SF18 | NA |
| TMEM187 | -1.9812326 | 1.30434616 | 0.52040198 | NA | TMEM187 | NA |
| USP39   | -2.1130153 | 1.22255532 | 0.52040198 | NA | USP39   | NA |
| WDR6    | 2.2784428  | 0.79289306 | 0.52040198 | NA | WDR6    | NA |
| ZNF155  | -2.0373414 | 1.22108449 | 0.52040198 | NA | ZNF155  | NA |

## **MAR 17vs19 q<0.01**

| <b>SYMBOL</b> | <b>17vs19.d</b> | <b>17vs19.FC</b> | <b>17vs19.q</b> | <b>HAR</b> | <b>CAR</b> | <b>MAR</b> |
|---------------|-----------------|------------------|-----------------|------------|------------|------------|
| AFAP1L2       | -3.1976804      | 1.61900834       | 0               | AFAP1L2    | NA         | AFAP1L2    |
| ALG10         | -4.3960045      | 1.61044113       | 0               | ALG10      | ALG10      | ALG10      |
| CDR2          | -4.3926751      | 1.59802619       | 0               | CDR2       | NA         | CDR2       |
| DAD1          | -3.4090834      | 1.42475318       | 0               | DAD1       | NA         | DAD1       |
| DKK2          | -2.7972101      | 1.54347974       | 0               | DKK2       | NA         | DKK2       |
| FAM19A2       | 3.0791036       | 0.75560504       | 0               | FAM19A2    | NA         | FAM19A2    |
| FAM27A        | 3.7260472       | 0.66240645       | 0               | FAM27A     | FAM27A     | FAM27A     |
| FOXC1         | -3.4526707      | 1.89779589       | 0               | FOXC1      | NA         | FOXC1      |
| GPC6          | -2.9574624      | 1.70632811       | 0               | GPC6       | GPC6       | GPC6       |
| KGFLP1        | -6.0498232      | 1.92952432       | 0               | KGFLP1     | KGFLP1     | KGFLP1     |
| KLF5          | -3.3245929      | 1.31204257       | 0               | KLF5       | NA         | KLF5       |
| LOC654433     | 6.1800862       | 0.38815097       | 0               | LOC654433  | NA         | LOC654433  |
| MPDZ          | -3.8035766      | 1.38811298       | 0               | MPDZ       | MPDZ       | MPDZ       |
| MYOM2         | 3.9185099       | 0.60750334       | 0               | MYOM2      | MYOM2      | MYOM2      |
| ACP6          | 4.0312994       | 0.65072026       | 0               | NA         | NA         | ACP6       |
| AHCY          | 3.8216127       | 0.6616698        | 0               | NA         | AHCY       | AHCY       |
| ALDH1A2       | -2.9144595      | 1.37007936       | 0               | NA         | ALDH1A2    | ALDH1A2    |
| AMFR          | -8.7147112      | 2.11275886       | 0               | NA         | NA         | AMFR       |
| ANXA3         | -3.0609158      | 1.75438391       | 0               | NA         | ANXA3      | ANXA3      |
| ASAH2B        | 3.1456685       | 0.69224484       | 0               | NA         | NA         | ASAH2B     |
| ATG12         | -2.7573778      | 1.34585972       | 0               | NA         | NA         | ATG12      |
| B4GALT5       | -4.2003741      | 1.4674269        | 0               | NA         | NA         | B4GALT5    |
| BBX           | -2.725413       | 1.50335278       | 0               | NA         | NA         | BBX        |
| BCL11B        | -3.0643644      | 1.39138997       | 0               | NA         | NA         | BCL11B     |
| BEND3         | -2.9661982      | 1.24150406       | 0               | NA         | NA         | BEND3      |
| BOC           | -2.8068475      | 1.27656318       | 0               | NA         | NA         | BOC        |
| C12orf75      | 3.5206713       | 0.67780015       | 0               | NA         | NA         | C12orf75   |
| C14orf101     | -3.3229101      | 1.38652116       | 0               | NA         | NA         | C14orf101  |
| C17orf75      | -2.9644849      | 1.77741209       | 0               | NA         | NA         | C17orf75   |
| C17orf82      | 3.0510839       | 0.71348687       | 0               | NA         | NA         | C17orf82   |
| C17orf97      | -3.4256608      | 1.89055616       | 0               | NA         | C17orf97   | C17orf97   |
| C18orf19      | -3.0628472      | 1.35442251       | 0               | NA         | NA         | C18orf19   |
| C1orf156      | -4.0044376      | 1.62573154       | 0               | NA         | NA         | C1orf156   |
| C20orf94      | -2.8759556      | 1.3876158        | 0               | NA         | NA         | C20orf94   |
| C21orf57      | 7.4867579       | 0.47059106       | 0               | NA         | NA         | C21orf57   |
| C2orf74       | -6.9874199      | 1.97745048       | 0               | NA         | NA         | C2orf74    |
| C3orf70       | -3.7496884      | 1.67548683       | 0               | NA         | NA         | C3orf70    |
| C8orf44       | -2.7352321      | 1.43097518       | 0               | NA         | NA         | C8orf44    |
| C8orf59       | -2.7116814      | 1.29717691       | 0               | NA         | NA         | C8orf59    |
| CACNB4        | -8.4974559      | 2.93779503       | 0               | NA         | NA         | CACNB4     |
| CCDC59        | -3.0452841      | 1.3867423        | 0               | NA         | NA         | CCDC59     |
| CCND1         | -4.7674023      | 1.57837942       | 0               | NA         | NA         | CCND1      |
| CCNJ          | -3.0257177      | 1.38453169       | 0               | NA         | NA         | CCNJ       |
| CDH1          | -3.9085644      | 1.52767902       | 0               | NA         | NA         | CDH1       |

|          |            |            |   |    |        |          |
|----------|------------|------------|---|----|--------|----------|
| CDH5     | -2.9995755 | 1.29949249 | 0 | NA | CDH5   | CDH5     |
| CDKAL1   | -6.8380691 | 1.93235063 | 0 | NA | NA     | CDKAL1   |
| CLDN11   | -2.8676812 | 1.53788098 | 0 | NA | NA     | CLDN11   |
| COL3A1   | -3.5343766 | 1.53911674 | 0 | NA | NA     | COL3A1   |
| CRBN     | -4.4936872 | 1.31982838 | 0 | NA | NA     | CRBN     |
| CRH      | 3.942527   | 0.52240886 | 0 | NA | NA     | CRH      |
| DARC     | 4.2546692  | 0.60437945 | 0 | NA | NA     | DARC     |
| DCN      | -2.7933295 | 1.41786959 | 0 | NA | NA     | DCN      |
| DDX17    | -15.817588 | 9.77010381 | 0 | NA | NA     | DDX17    |
| DDX3Y    | 16.876416  | 0.17718856 | 0 | NA | DDX3Y  | DDX3Y    |
| DEM1     | -4.1108629 | 1.39193028 | 0 | NA | NA     | DEM1     |
| DKK1     | -3.6500275 | 1.68388797 | 0 | NA | NA     | DKK1     |
| DOCK7    | -5.7660623 | 1.62898159 | 0 | NA | NA     | DOCK7    |
| DSP      | -2.7089628 | 1.75689966 | 0 | NA | NA     | DSP      |
| EGR1     | -3.2586722 | 1.70147338 | 0 | NA | NA     | EGR1     |
| EXT1     | -2.7939417 | 1.33590226 | 0 | NA | NA     | EXT1     |
| EYA1     | -3.2278247 | 1.50514894 | 0 | NA | NA     | EYA1     |
| FABP2    | -3.1328576 | 1.50995037 | 0 | NA | FABP2  | FABP2    |
| FAM110B  | -2.71985   | 1.25767091 | 0 | NA | NA     | FAM110B  |
| FAM129A  | -3.7403437 | 1.4648489  | 0 | NA | NA     | FAM129A  |
| FAM178B  | 3.3666818  | 0.67561962 | 0 | NA | NA     | FAM178B  |
| FAM46C   | -6.0599677 | 2.33991468 | 0 | NA | NA     | FAM46C   |
| FAM60A   | -2.842808  | 1.5858925  | 0 | NA | NA     | FAM60A   |
| FBLN5    | -2.8513505 | 1.67224398 | 0 | NA | NA     | FBLN5    |
| FLJ32063 | 3.4212591  | 0.74778534 | 0 | NA | NA     | FLJ32063 |
| FMNL2    | -2.7567558 | 1.43286398 | 0 | NA | FMNL2  | FMNL2    |
| FOS      | -3.3201611 | 2.17313695 | 0 | NA | NA     | FOS      |
| FUT11    | -3.36033   | 1.34288763 | 0 | NA | NA     | FUT11    |
| FZD3     | -4.9729828 | 2.70223052 | 0 | NA | NA     | FZD3     |
| GAS2     | -3.0464526 | 1.65391062 | 0 | NA | NA     | GAS2     |
| GATC     | -4.9569503 | 1.5386214  | 0 | NA | NA     | GATC     |
| GJA1     | -3.1733784 | 2.19155709 | 0 | NA | GJA1   | GJA1     |
| GJC1     | -2.8228101 | 1.41752178 | 0 | NA | NA     | GJC1     |
| GK3P     | -3.041541  | 1.40839884 | 0 | NA | NA     | GK3P     |
| GLCE     | -3.297914  | 1.36107722 | 0 | NA | NA     | GLCE     |
| GNG11    | -4.6550523 | 1.60596159 | 0 | NA | NA     | GNG11    |
| GNG2     | 3.3049392  | 0.67064371 | 0 | NA | NA     | GNG2     |
| GOLGA1   | -2.8694446 | 1.38471146 | 0 | NA | NA     | GOLGA1   |
| GPR155   | -2.9358654 | 1.32266431 | 0 | NA | NA     | GPR155   |
| GRIN2B   | -2.7893494 | 1.86405719 | 0 | NA | NA     | GRIN2B   |
| GSTT1    | 14.567224  | 0.29536778 | 0 | NA | NA     | GSTT1    |
| GYPA     | -3.3398883 | 1.50730896 | 0 | NA | NA     | GYPA     |
| HADHB    | -3.5500149 | 1.30255086 | 0 | NA | NA     | HADHB    |
| HAS3     | -2.7170941 | 1.34573993 | 0 | NA | NA     | HAS3     |
| HBA1     | -4.1478687 | 2.17084113 | 0 | NA | HBA1   | HBA1     |
| HBB      | -6.0753265 | 3.07303904 | 0 | NA | NA     | HBB      |
| HBG1     | -5.0919514 | 2.4485439  | 0 | NA | NA     | HBG1     |
| HBM      | -3.4403808 | 2.1078457  | 0 | NA | HBM    | HBM      |
| HCG11    | -2.6850125 | 1.46858808 | 0 | NA | NA     | HCG11    |
| HEATR3   | -3.6981394 | 1.7535573  | 0 | NA | HEATR3 | HEATR3   |
| HEMGN    | -3.7746287 | 2.04436448 | 0 | NA | NA     | HEMGN    |
| HLA-DMA  | 4.852325   | 0.47355534 | 0 | NA | NA     | HLA-DMA  |
| HMBOX1   | 9.4320641  | 0.24538978 | 0 | NA | NA     | HMBOX1   |
| HNRNPA0  | -2.8345414 | 1.2364776  | 0 | NA | NA     | HNRNPA0  |
| HSPA2    | -3.2032388 | 1.45747749 | 0 | NA | NA     | HSPA2    |
| HTR2A    | -8.5978236 | 3.18105929 | 0 | NA | NA     | HTR2A    |
| IMMP1L   | -3.1167623 | 1.36790945 | 0 | NA | NA     | IMMP1L   |
| ITGB3BP  | 3.7077098  | 0.66980147 | 0 | NA | NA     | ITGB3BP  |

|              |            |            |   |    |           |              |
|--------------|------------|------------|---|----|-----------|--------------|
| ITPRIP       | -4.8085233 | 1.38297881 | 0 | NA | NA        | ITPRIP       |
| KGFLP2       | -10.258703 | 2.72238842 | 0 | NA | NA        | KGFLP2       |
| KIF3A        | -3.0737407 | 1.52727468 | 0 | NA | NA        | KIF3A        |
| KLHDC8A      | 4.5112655  | 0.68928407 | 0 | NA | NA        | KLHDC8A      |
| KPNB1        | -2.7311651 | 1.28255063 | 0 | NA | NA        | KPNB1        |
| LBH          | -3.1891558 | 1.3292535  | 0 | NA | LBH       | LBH          |
| LCLAT1       | -4.0539244 | 1.40814788 | 0 | NA | NA        | LCLAT1       |
| LMNB1        | -3.4886148 | 1.61615901 | 0 | NA | LMNB1     | LMNB1        |
| LMO7         | -2.8636254 | 1.393642   | 0 | NA | NA        | LMO7         |
| LOC100129387 | -3.3914122 | 1.61354421 | 0 | NA | NA        | LOC100129387 |
| LOC144486    | -2.7714156 | 1.27120705 | 0 | NA | NA        | LOC144486    |
| LOC221710    | -2.9769436 | 1.70109375 | 0 | NA | NA        | LOC221710    |
| LOC728411    | 3.7763355  | 0.60805245 | 0 | NA | LOC728411 | LOC728411    |
| LOC728554    | 3.1656053  | 0.78126995 | 0 | NA | NA        | LOC728554    |
| LRCH1        | -2.9817491 | 1.48754686 | 0 | NA | NA        | LRCH1        |
| LRP1         | 3.4631467  | 0.73756441 | 0 | NA | LRP1      | LRP1         |
| LRRC37A4     | -3.3698976 | 1.68280214 | 0 | NA | NA        | LRRC37A4     |
| LSM11        | -3.2322088 | 1.71262628 | 0 | NA | NA        | LSM11        |
| LSM2         | -3.2913556 | 1.47098338 | 0 | NA | NA        | LSM2         |
| LTF          | 2.9664019  | 0.72724447 | 0 | NA | NA        | LTF          |
| LUM          | -3.2260897 | 1.95091755 | 0 | NA | NA        | LUM          |
| MAMDC2       | -3.215659  | 1.43587342 | 0 | NA | NA        | MAMDC2       |
| MAP9         | -5.3005398 | 1.91553803 | 0 | NA | MAP9      | MAP9         |
| MCM4         | -2.715579  | 1.29650881 | 0 | NA | MCM4      | MCM4         |
| MDM4         | 3.0196712  | 0.78043155 | 0 | NA | NA        | MDM4         |
| MED6         | -3.3017157 | 1.47041287 | 0 | NA | NA        | MED6         |
| METT10D      | -2.7754442 | 1.3206454  | 0 | NA | NA        | METT10D      |
| METTL10      | 3.7397373  | 0.69287372 | 0 | NA | NA        | METTL10      |
| MFN1         | -4.2921499 | 1.39514778 | 0 | NA | NA        | MFN1         |
| MLH3         | -3.3077975 | 1.27531588 | 0 | NA | NA        | MLH3         |
| MRPS10       | -2.8214155 | 1.36885454 | 0 | NA | NA        | MRPS10       |
| MRPS16       | -3.3590271 | 1.35298982 | 0 | NA | NA        | MRPS16       |
| MYOCD        | -3.082473  | 1.36241313 | 0 | NA | NA        | MYOCD        |
| NAV2         | -4.3314651 | 1.32226567 | 0 | NA | NA        | NAV2         |
| NHSL1        | -3.5147792 | 1.30160174 | 0 | NA | NA        | NHSL1        |
| NID2         | -3.5619483 | 1.75737721 | 0 | NA | NA        | NID2         |
| NOV          | -2.847625  | 1.70505348 | 0 | NA | NA        | NOV          |
| OCLN         | -3.4971851 | 1.51101582 | 0 | NA | NA        | OCLN         |
| ODF1         | 4.6347296  | 0.55370102 | 0 | NA | NA        | ODF1         |
| OLFML2B      | -2.7124295 | 1.40929775 | 0 | NA | OLFML2B   | OLFML2B      |
| PCDH11Y      | 3.3331052  | 0.66928933 | 0 | NA | PCDH11Y   | PCDH11Y      |
| PCDHA10      | -2.865924  | 1.36392247 | 0 | NA | NA        | PCDHA10      |
| PCDHB2       | -3.4170174 | 1.79354433 | 0 | NA | PCDHB2    | PCDHB2       |
| PCSK5        | -3.0316199 | 1.39730482 | 0 | NA | NA        | PCSK5        |
| PDGFC        | -4.4359191 | 1.58063729 | 0 | NA | NA        | PDGFC        |
| PDGFRL       | -3.5086878 | 2.13452466 | 0 | NA | NA        | PDGFRL       |
| PEX13        | -4.0700533 | 1.51194967 | 0 | NA | PEX13     | PEX13        |
| PEX7         | -2.8320448 | 1.4155305  | 0 | NA | NA        | PEX7         |
| PFDN5        | -4.0513292 | 1.36869283 | 0 | NA | NA        | PFDN5        |
| PGCP         | -2.6868551 | 1.3440617  | 0 | NA | NA        | PGCP         |
| POLR1A       | -3.0997891 | 1.34305056 | 0 | NA | NA        | POLR1A       |
| POLR3E       | -3.0437648 | 1.34474236 | 0 | NA | NA        | POLR3E       |
| POMZP3       | 10.36362   | 0.3317839  | 0 | NA | NA        | POMZP3       |
| PPIG         | -3.1038205 | 1.48329993 | 0 | NA | NA        | PPIG         |
| PROCR        | -3.6552633 | 1.42352553 | 0 | NA | NA        | PROCR        |
| PRSS35       | -2.7653919 | 1.76424926 | 0 | NA | NA        | PRSS35       |
| PSMB5        | -3.5088104 | 1.32463521 | 0 | NA | NA        | PSMB5        |

|          |            |            |   |         |         |          |
|----------|------------|------------|---|---------|---------|----------|
| PTN      | -3.5390284 | 1.42543178 | 0 | NA      | NA      | PTN      |
| PTPRS    | -3.3876319 | 1.37662535 | 0 | NA      | NA      | PTPRS    |
| RCL1     | -3.8249932 | 1.39883248 | 0 | NA      | NA      | RCL1     |
| RCSD1    | -2.889604  | 1.52154846 | 0 | NA      | NA      | RCSD1    |
| RHOBTB2  | 3.0460716  | 0.75270106 | 0 | NA      | NA      | RHOBTB2  |
| RPL14    | -3.225496  | 1.3377925  | 0 | NA      | NA      | RPL14    |
| RPL27A   | -4.8315189 | 1.57672313 | 0 | NA      | NA      | RPL27A   |
| RPL38    | -3.7755266 | 1.3614783  | 0 | NA      | NA      | RPL38    |
| RPS23    | 5.6691597  | 0.65934831 | 0 | NA      | NA      | RPS23    |
| RPS4Y1   | 34.031146  | 0.01044102 | 0 | NA      | NA      | RPS4Y1   |
| RWDD2A   | -2.843736  | 1.3185053  | 0 | NA      | NA      | RWDD2A   |
| SAR1A    | -11.355276 | 3.05639008 | 0 | NA      | NA      | SAR1A    |
| SDC3     | 3.9075778  | 0.68806994 | 0 | NA      | NA      | SDC3     |
| SERINC3  | -3.5661646 | 1.45310724 | 0 | NA      | NA      | SERINC3  |
| SERPINH1 | -3.5150056 | 1.42815054 | 0 | NA      | NA      | SERPINH1 |
| SETD6    | -3.1832995 | 1.57052209 | 0 | NA      | NA      | SETD6    |
| SLC20A2  | -2.8595998 | 1.4429525  | 0 | NA      | NA      | SLC20A2  |
| SLC41A2  | -3.4222912 | 1.39333258 | 0 | NA      | NA      | SLC41A2  |
| SLC44A1  | -3.7981917 | 1.47477665 | 0 | NA      | SLC44A1 | SLC44A1  |
| SNAP29   | -6.3300364 | 1.64923889 | 0 | NA      | NA      | SNAP29   |
| SOX21    | 3.5374339  | 0.65163046 | 0 | NA      | SOX21   | SOX21    |
| SPARC    | -3.0910308 | 1.34124545 | 0 | NA      | NA      | SPARC    |
| SPATA5   | -3.2914178 | 1.4958473  | 0 | NA      | NA      | SPATA5   |
| SVIL     | -2.9796019 | 1.44575569 | 0 | NA      | SVIL    | SVIL     |
| TBX15    | -3.2246332 | 1.53301564 | 0 | NA      | NA      | TBX15    |
| TERF1    | -3.228146  | 1.340048   | 0 | NA      | NA      | TERF1    |
| TMEM100  | -3.0007249 | 1.60591256 | 0 | NA      | NA      | TMEM100  |
| TMEM106C | -2.9400017 | 1.50954861 | 0 | NA      | NA      | TMEM106C |
| TMEM159  | -5.3443917 | 2.63754195 | 0 | NA      | NA      | TMEM159  |
| TMEM169  | -2.7655447 | 1.25706554 | 0 | NA      | NA      | TMEM169  |
| TMEM178  | -2.6904621 | 1.39217609 | 0 | NA      | NA      | TMEM178  |
| TMEM33   | -2.6658069 | 1.35762943 | 0 | NA      | NA      | TMEM33   |
| TNNI3K   | 4.7634285  | 0.57583172 | 0 | NA      | NA      | TNNI3K   |
| TTC32    | -6.837454  | 1.87150878 | 0 | NA      | NA      | TTC32    |
| TWSG1    | -2.8596631 | 1.33741803 | 0 | NA      | NA      | TWSG1    |
| TXN2     | -3.1741458 | 1.30516754 | 0 | NA      | NA      | TXN2     |
| UBE2H    | -2.9120245 | 1.29370931 | 0 | NA      | NA      | UBE2H    |
| ULBP2    | 3.235594   | 0.65035909 | 0 | NA      | NA      | ULBP2    |
| UPF3A    | -2.8879641 | 1.4299963  | 0 | NA      | NA      | UPF3A    |
| USP7     | -3.4224056 | 1.48698682 | 0 | NA      | NA      | USP7     |
| USP9Y    | 24.930165  | 0.03392756 | 0 | NA      | NA      | USP9Y    |
| VAMP3    | -3.8246818 | 1.30583534 | 0 | NA      | VAMP3   | VAMP3    |
| VGLL4    | 3.9162699  | 0.49989022 | 0 | NA      | NA      | VGLL4    |
| WDR86    | 3.2488551  | 0.69935269 | 0 | NA      | WDR86   | WDR86    |
| WNK3     | -3.2041129 | 1.50150119 | 0 | NA      | WNK3    | WNK3     |
| ZFPM2    | -4.5503508 | 1.52778901 | 0 | NA      | NA      | ZFPM2    |
| ZFX      | -2.982037  | 1.46067025 | 0 | NA      | ZFX     | ZFX      |
| ZNF217   | -3.8102481 | 1.65942746 | 0 | NA      | ZNF217  | ZNF217   |
| ZNF281   | -3.4402922 | 1.32854507 | 0 | NA      | NA      | ZNF281   |
| ZNF33B   | 3.2726387  | 0.53745074 | 0 | NA      | NA      | ZNF33B   |
| ZNF410   | -2.9582169 | 1.30315211 | 0 | NA      | NA      | ZNF410   |
| ZNF673   | -2.8295142 | 1.35068033 | 0 | NA      | NA      | ZNF673   |
| ZNF678   | -7.0487526 | 3.15095782 | 0 | NA      | NA      | ZNF678   |
| ZNHIT6   | -2.8517864 | 1.32338501 | 0 | NA      | NA      | ZNHIT6   |
| NANOS1   | 3.0195092  | 0.76802038 | 0 | NANOS1  | NA      | NANOS1   |
| PITPNM3  | 3.1659088  | 0.71006956 | 0 | PITPNM3 | NA      | PITPNM3  |
| SDPR     | -3.040839  | 1.4477601  | 0 | SDPR    | SDPR    | SDPR     |
| SRR      | -4.3326417 | 1.52243837 | 0 | SRR     | NA      | SRR      |

|           |            |            |            |           |          |           |
|-----------|------------|------------|------------|-----------|----------|-----------|
| SSR1      | -3.1579583 | 1.33434048 | 0          | SSR1      | NA       | SSR1      |
| STAG3L4   | -5.9270751 | 1.80174807 | 0          | STAG3L4   | NA       | STAG3L4   |
| TBC1D15   | -2.7400071 | 1.3902345  | 0          | TBC1D15   | NA       | TBC1D15   |
| TTY15     | 16.499994  | 0.04287293 | 0          | TTY15     | TTY15    | TTY15     |
| VIP       | 3.1452416  | 0.72815259 | 0          | VIP       | NA       | VIP       |
| APCDD1    | -2.375738  | 1.25099685 | 0.15408684 | APCDD1    | NA       | APCDD1    |
| BPGM      | -2.4073412 | 1.32814895 | 0.15408684 | BPGM      | NA       | BPGM      |
| C9orf72   | -2.3188655 | 1.25802647 | 0.15408684 | C9orf72   | NA       | C9orf72   |
| DAZ4      | 2.859064   | 0.57365678 | 0.15408684 | DAZ4      | NA       | DAZ4      |
| EDNRA     | -2.5143927 | 1.50640502 | 0.15408684 | EDNRA     | EDNRA    | EDNRA     |
| ITIH5     | -2.3664665 | 1.25547418 | 0.15408684 | ITIH5     | ITIH5    | ITIH5     |
| LOC400657 | -2.6144841 | 1.26930781 | 0.15408684 | LOC400657 | NA       | LOC400657 |
| MAP3K7    | -2.3125599 | 1.23669912 | 0.15408684 | MAP3K7    | MAP3K7   | MAP3K7    |
| AACS      | 2.7772252  | 0.81928872 | 0.15408684 | NA        | NA       | AACS      |
| AASDH     | -2.2837131 | 1.33839499 | 0.15408684 | NA        | NA       | AASDH     |
| AASS      | -2.3766554 | 1.24422141 | 0.15408684 | NA        | NA       | AASS      |
| ADAMTS5   | -2.5578755 | 1.32124927 | 0.15408684 | NA        | NA       | ADAMTS5   |
| ADORA2B   | -2.6464446 | 1.52409042 | 0.15408684 | NA        | NA       | ADORA2B   |
| AKAP12    | -2.2786081 | 1.22442061 | 0.15408684 | NA        | AKAP12   | AKAP12    |
| AKAP5     | -2.4516203 | 1.43557392 | 0.15408684 | NA        | NA       | AKAP5     |
| ALKBH3    | -2.4735768 | 1.26430568 | 0.15408684 | NA        | NA       | ALKBH3    |
| ANGPT2    | -2.3641777 | 1.44208847 | 0.15408684 | NA        | NA       | ANGPT2    |
| ANKRD13A  | -2.609523  | 1.27601125 | 0.15408684 | NA        | NA       | ANKRD13A  |
| ARFGEF2   | -2.3904299 | 1.20561488 | 0.15408684 | NA        | NA       | ARFGEF2   |
| BMPR1B    | 2.6068905  | 0.57627958 | 0.15408684 | NA        | BMPR1B   | BMPR1B    |
| BPNT1     | -2.6408925 | 1.2100756  | 0.15408684 | NA        | NA       | BPNT1     |
| BUB3      | -2.4370156 | 1.20337506 | 0.15408684 | NA        | NA       | BUB3      |
| C10orf78  | -2.3176742 | 1.3305325  | 0.15408684 | NA        | NA       | C10orf78  |
| C14orf118 | -2.3531121 | 1.33016407 | 0.15408684 | NA        | NA       | C14orf118 |
| C21orf119 | 2.844505   | 0.67810524 | 0.15408684 | NA        | NA       | C21orf119 |
| C6orf225  | -2.4203083 | 1.2979177  | 0.15408684 | NA        | C6orf225 | C6orf225  |
| C6orf52   | 2.7647041  | 0.73088546 | 0.15408684 | NA        | NA       | C6orf52   |
| CASC3     | -2.6647051 | 1.30076511 | 0.15408684 | NA        | NA       | CASC3     |
| CAST      | -2.4073902 | 1.23782379 | 0.15408684 | NA        | NA       | CAST      |
| CBX5      | -2.3490675 | 1.38954567 | 0.15408684 | NA        | NA       | CBX5      |
| CCL2      | -2.4253942 | 1.60984817 | 0.15408684 | NA        | CCL2     | CCL2      |
| CCNT1     | -2.4365363 | 1.58989758 | 0.15408684 | NA        | NA       | CCNT1     |
| CD302     | -2.5345817 | 1.43298482 | 0.15408684 | NA        | NA       | CD302     |
| CLSTN2    | -2.4636842 | 1.6788568  | 0.15408684 | NA        | NA       | CLSTN2    |
| CNIH4     | -2.4647397 | 1.24346588 | 0.15408684 | NA        | NA       | CNIH4     |
| COL11A1   | -2.4263028 | 1.58502373 | 0.15408684 | NA        | NA       | COL11A1   |
| COL1A2    | -2.5247003 | 1.53757227 | 0.15408684 | NA        | NA       | COL1A2    |
| COL21A1   | -2.2715263 | 1.39844564 | 0.15408684 | NA        | NA       | COL21A1   |
| CPEB3     | -2.3418384 | 1.29947995 | 0.15408684 | NA        | NA       | CPEB3     |
| CRB1      | 2.7218365  | 0.77834041 | 0.15408684 | NA        | NA       | CRB1      |
| CSRNP3    | -2.6324874 | 1.77680543 | 0.15408684 | NA        | NA       | CSRNP3    |
| CTNNB1    | -2.3310371 | 1.55618518 | 0.15408684 | NA        | CTNNB1   | CTNNB1    |
| CTSL1     | -2.5466408 | 1.46599936 | 0.15408684 | NA        | NA       | CTSL1     |
| CUL2      | 2.8363592  | 0.7865667  | 0.15408684 | NA        | CUL2     | CUL2      |
| CYP1B1    | -2.5728104 | 1.59423958 | 0.15408684 | NA        | NA       | CYP1B1    |
| DAPK1     | 2.8189297  | 0.76157288 | 0.15408684 | NA        | NA       | DAPK1     |
| DGAT2     | 2.9155871  | 0.76247906 | 0.15408684 | NA        | NA       | DGAT2     |
| DGKA      | 2.6749752  | 0.76261627 | 0.15408684 | NA        | NA       | DGKA      |
| DHRS11    | -2.3061322 | 1.45353867 | 0.15408684 | NA        | NA       | DHRS11    |
| DPY19L2   | -2.3058242 | 1.26838212 | 0.15408684 | NA        | DPY19L2  | DPY19L2   |
| EFEMP1    | -2.2601246 | 1.512079   | 0.15408684 | NA        | NA       | EFEMP1    |
| EIF1AX    | -2.2607281 | 1.24915554 | 0.15408684 | NA        | EIF1AX   | EIF1AX    |
| EMCN      | -2.4724299 | 1.31793197 | 0.15408684 | NA        | EMCN     | EMCN      |



|           |            |            |            |    |           |           |
|-----------|------------|------------|------------|----|-----------|-----------|
| ENDOD1    | -2.6652223 | 1.23841843 | 0.15408684 | NA | NA        | ENDOD1    |
| ENTPD4    | -2.2639859 | 1.26243617 | 0.15408684 | NA | NA        | ENTPD4    |
| EPB41L1   | -2.5552412 | 1.24069766 | 0.15408684 | NA | EPB41L1   | EPB41L1   |
| EPC1      | -2.5084281 | 1.27380607 | 0.15408684 | NA | NA        | EPC1      |
| ERCC8     | -2.3758432 | 1.20989691 | 0.15408684 | NA | NA        | ERCC8     |
| ESCO1     | -2.5615491 | 1.28333929 | 0.15408684 | NA | ESCO1     | ESCO1     |
| EXOSC2    | -2.507613  | 1.19153459 | 0.15408684 | NA | NA        | EXOSC2    |
| FASTKD2   | -2.439101  | 1.25346273 | 0.15408684 | NA | FASTKD2   | FASTKD2   |
| FBXW10    | 2.5525607  | 0.7559772  | 0.15408684 | NA | NA        | FBXW10    |
| GABRB1    | 2.6685844  | 0.59317539 | 0.15408684 | NA | NA        | GABRB1    |
| GALNT1    | -2.5505422 | 1.2497617  | 0.15408684 | NA | NA        | GALNT1    |
| GLRB      | -2.5792542 | 1.28960532 | 0.15408684 | NA | GLRB      | GLRB      |
| GSK3B     | -2.3125855 | 1.8209692  | 0.15408684 | NA | NA        | GSK3B     |
| HCCS      | -2.2828589 | 1.20536856 | 0.15408684 | NA | HCCS      | HCCS      |
| HDDC2     | 2.513864   | 0.71840442 | 0.15408684 | NA | HDDC2     | HDDC2     |
| HHAT      | -2.6642639 | 1.37203725 | 0.15408684 | NA | NA        | HHAT      |
| HHLA3     | 2.5531852  | 0.84325886 | 0.15408684 | NA | NA        | HHLA3     |
| HYI       | -2.5821409 | 1.26010427 | 0.15408684 | NA | HYI       | HYI       |
| ITIH2     | -2.5172604 | 1.57287272 | 0.15408684 | NA | NA        | ITIH2     |
| ITPRIPL2  | -2.2714985 | 1.18882915 | 0.15408684 | NA | NA        | ITPRIPL2  |
| KATNA1    | -2.4099145 | 1.20178113 | 0.15408684 | NA | NA        | KATNA1    |
| KCNG2     | -2.3943031 | 1.31400163 | 0.15408684 | NA | NA        | KCNG2     |
| KHDRBS2   | -2.310516  | 1.28131427 | 0.15408684 | NA | KHDRBS2   | KHDRBS2   |
| KIAA1033  | -2.5258399 | 1.4238757  | 0.15408684 | NA | NA        | KIAA1033  |
| KIF21A    | -2.5343021 | 1.31543011 | 0.15408684 | NA | NA        | KIF21A    |
| KLHL5     | -2.5304512 | 1.28779043 | 0.15408684 | NA | NA        | KLHL5     |
| KRT75     | 2.5310171  | 0.83537088 | 0.15408684 | NA | NA        | KRT75     |
| LDHAL6A   | 2.7683764  | 0.7212885  | 0.15408684 | NA | NA        | LDHAL6A   |
| LOC253039 | -2.2687965 | 1.31648364 | 0.15408684 | NA | NA        | LOC253039 |
| LOC338758 | -2.632777  | 1.41919053 | 0.15408684 | NA | LOC338758 | LOC338758 |
| LOC344595 | -2.3850471 | 1.28620698 | 0.15408684 | NA | NA        | LOC344595 |
| LOC723809 | 2.8695723  | 0.71704125 | 0.15408684 | NA | LOC723809 | LOC723809 |
| LYVE1     | -2.2907557 | 1.9875599  | 0.15408684 | NA | NA        | LYVE1     |
| MALAT1    | -2.6059227 | 1.84262573 | 0.15408684 | NA | NA        | MALAT1    |
| MAML3     | -2.2695581 | 1.18278914 | 0.15408684 | NA | NA        | MAML3     |
| MAN1A1    | -2.3485979 | 1.47403349 | 0.15408684 | NA | NA        | MAN1A1    |
| MARS2     | -2.5238092 | 1.38801805 | 0.15408684 | NA | NA        | MARS2     |
| MED1      | -2.6381891 | 1.36884522 | 0.15408684 | NA | NA        | MED1      |
| MMGT1     | -2.3779571 | 1.23820151 | 0.15408684 | NA | NA        | MMGT1     |
| MRC2      | -2.6443084 | 1.27734229 | 0.15408684 | NA | NA        | MRC2      |
| NCAPG     | -2.3366229 | 1.38654065 | 0.15408684 | NA | NA        | NCAPG     |
| NEK10     | -2.2733071 | 1.3437932  | 0.15408684 | NA | NA        | NEK10     |
| NEK11     | 2.6425471  | 0.83268837 | 0.15408684 | NA | NA        | NEK11     |
| NKAIN2    | -2.4988171 | 1.40672174 | 0.15408684 | NA | NKAIN2    | NKAIN2    |
| OLFML3    | -2.5775999 | 1.68013647 | 0.15408684 | NA | NA        | OLFML3    |
| PBLD      | -2.3296979 | 1.38976503 | 0.15408684 | NA | NA        | PBLD      |
| PEX3      | -2.3367843 | 1.24747703 | 0.15408684 | NA | NA        | PEX3      |
| PHAX      | -2.6002356 | 1.26474595 | 0.15408684 | NA | NA        | PHAX      |
| PHB       | -2.3630554 | 1.18715953 | 0.15408684 | NA | PHB       | PHB       |
| PHF2      | 2.7253249  | 0.72802401 | 0.15408684 | NA | PHF2      | PHF2      |
| PIGF      | -2.5599996 | 1.22772039 | 0.15408684 | NA | NA        | PIGF      |
| PITRM1    | 2.7774431  | 0.78930237 | 0.15408684 | NA | NA        | PITRM1    |
| PNOC      | 2.5737188  | 0.75599796 | 0.15408684 | NA | NA        | PNOC      |
| PNPLA8    | -2.3946008 | 1.24409588 | 0.15408684 | NA | NA        | PNPLA8    |
| PPIB      | -2.3549659 | 1.28657741 | 0.15408684 | NA | NA        | PPIB      |
| PRMT8     | -2.3041096 | 1.2286679  | 0.15408684 | NA | NA        | PRMT8     |
| PRPF39    | -2.3193488 | 1.47045554 | 0.15408684 | NA | NA        | PRPF39    |
| PRPH2     | 2.8264552  | 0.70562354 | 0.15408684 | NA | PRPH2     | PRPH2     |

|           |            |            |            |           |         |           |
|-----------|------------|------------|------------|-----------|---------|-----------|
| PTCD3     | -2.3290937 | 1.20928246 | 0.15408684 | NA        | NA      | PTCD3     |
| RASA2     | -2.3064891 | 1.37965524 | 0.15408684 | NA        | NA      | RASA2     |
| RBMS3     | -2.5382434 | 1.17434759 | 0.15408684 | NA        | NA      | RBMS3     |
| RP9       | -2.5188738 | 1.24645567 | 0.15408684 | NA        | RP9     | RP9       |
| RPGRIP1L  | -2.2612711 | 1.2759607  | 0.15408684 | NA        | NA      | RPGRIP1L  |
| RPP25     | 2.9209582  | 0.75889774 | 0.15408684 | NA        | NA      | RPP25     |
| SCARNA2   | 2.7205174  | 0.69920881 | 0.15408684 | NA        | NA      | SCARNA2   |
| SEC31A    | -2.4401949 | 1.27613832 | 0.15408684 | NA        | NA      | SEC31A    |
| SENP8     | -2.3818281 | 1.17602863 | 0.15408684 | NA        | NA      | SENP8     |
| SFRS12IP1 | -2.3118187 | 1.28184605 | 0.15408684 | NA        | NA      | SFRS12IP1 |
| SIAH3     | -2.5901526 | 1.8345651  | 0.15408684 | NA        | NA      | SIAH3     |
| SLC35B3   | -2.2959573 | 1.31271787 | 0.15408684 | NA        | NA      | SLC35B3   |
| SMURF2    | -2.263931  | 1.37802813 | 0.15408684 | NA        | NA      | SMURF2    |
| SOAT2     | 2.5770608  | 0.73759794 | 0.15408684 | NA        | NA      | SOAT2     |
| SRL       | -2.5935564 | 1.28325817 | 0.15408684 | NA        | NA      | SRL       |
| SSR3      | -2.5990322 | 1.35165952 | 0.15408684 | NA        | SSR3    | SSR3      |
| SYPL2     | 2.7515259  | 0.65328867 | 0.15408684 | NA        | SYPL2   | SYPL2     |
| TAOK1     | -2.4294969 | 1.56100579 | 0.15408684 | NA        | NA      | TAOK1     |
| TCL1A     | 2.7836999  | 0.79808427 | 0.15408684 | NA        | NA      | TCL1A     |
| TM7SF4    | 2.6204674  | 0.77172555 | 0.15408684 | NA        | TM7SF4  | TM7SF4    |
| TRAPPC5   | -2.4614767 | 1.30937375 | 0.15408684 | NA        | NA      | TRAPPC5   |
| TRIM69    | -2.3625574 | 1.46343493 | 0.15408684 | NA        | NA      | TRIM69    |
| TUBB6     | -2.3299468 | 1.45598407 | 0.15408684 | NA        | NA      | TUBB6     |
| UHRF1     | -2.5674501 | 1.3798915  | 0.15408684 | NA        | NA      | UHRF1     |
| VDAC3     | -2.4883873 | 1.21200174 | 0.15408684 | NA        | NA      | VDAC3     |
| VPS29     | -2.4892411 | 1.22026069 | 0.15408684 | NA        | NA      | VPS29     |
| WDFY1     | -2.3148448 | 1.31487986 | 0.15408684 | NA        | NA      | WDFY1     |
| ZCCHC6    | -2.4770813 | 1.23305412 | 0.15408684 | NA        | NA      | ZCCHC6    |
| ZEB1      | -2.4675301 | 1.41869147 | 0.15408684 | NA        | NA      | ZEB1      |
| ZIC2      | -2.5628214 | 1.55072803 | 0.15408684 | NA        | NA      | ZIC2      |
| ZNF2      | -2.3970363 | 1.41933831 | 0.15408684 | NA        | NA      | ZNF2      |
| ZNF326    | -2.3209629 | 1.23916508 | 0.15408684 | NA        | ZNF326  | ZNF326    |
| ZNF568    | -2.5273151 | 1.28010059 | 0.15408684 | NA        | NA      | ZNF568    |
| ZNF644    | -2.5407901 | 1.55442586 | 0.15408684 | NA        | ZNF644  | ZNF644    |
| ZNF646    | -2.3111948 | 1.33040038 | 0.15408684 | NA        | NA      | ZNF646    |
| ZNF827    | -2.4277283 | 1.4249109  | 0.15408684 | NA        | NA      | ZNF827    |
| NFU1      | 2.5576059  | 0.78910103 | 0.15408684 | NFU1      | NFU1    | NFU1      |
| NKAIN3    | 2.9072777  | 0.80136794 | 0.15408684 | NKAIN3    | NKAIN3  | NKAIN3    |
| PKN2      | -2.5086486 | 1.30100005 | 0.15408684 | PKN2      | PKN2    | PKN2      |
| PRKAB2    | -2.4229614 | 1.32794586 | 0.15408684 | PRKAB2    | NA      | PRKAB2    |
| PSAT1     | -2.3191814 | 1.22755029 | 0.15408684 | PSAT1     | PSAT1   | PSAT1     |
| TOP1      | -2.5863571 | 1.42133876 | 0.15408684 | TOP1      | NA      | TOP1      |
| WSB1      | -2.3133712 | 1.38965777 | 0.15408684 | WSB1      | WSB1    | WSB1      |
| ADPGK     | -2.0753836 | 1.21126407 | 0.52040198 | ADPGK     | NA      | ADPGK     |
| ALDH6A1   | -1.9990247 | 1.22934956 | 0.52040198 | ALDH6A1   | NA      | ALDH6A1   |
| ATOH1     | 2.1058924  | 0.72609592 | 0.52040198 | ATOH1     | ATOH1   | ATOH1     |
| CA9       | 2.0772529  | 0.71449784 | 0.52040198 | CA9       | NA      | CA9       |
| EFCAB4B   | 2.4987579  | 0.8501656  | 0.52040198 | EFCAB4B   | EFCAB4B | EFCAB4B   |
| FAM96A    | -1.9027157 | 1.18994558 | 0.52040198 | FAM96A    | FAM96A  | FAM96A    |
| FAT1      | -2.1651627 | 1.28255083 | 0.52040198 | FAT1      | FAT1    | FAT1      |
| FLJ46321  | 2.44914    | 0.76711204 | 0.52040198 | FLJ46321  | NA      | FLJ46321  |
| FRMD6     | -2.2175814 | 1.30253868 | 0.52040198 | FRMD6     | FRMD6   | FRMD6     |
| IFLTD1    | 2.4490002  | 0.75215324 | 0.52040198 | IFLTD1    | NA      | IFLTD1    |
| KCTD12    | -1.9045931 | 1.28329693 | 0.52040198 | KCTD12    | KCTD12  | KCTD12    |
| KDR       | -2.1881049 | 1.32116515 | 0.52040198 | KDR       | KDR     | KDR       |
| LOC541471 | -2.1699253 | 1.20290734 | 0.52040198 | LOC541471 | NA      | LOC541471 |
| MGST2     | -2.1789181 | 1.41626241 | 0.52040198 | MGST2     | NA      | MGST2     |
| ABCA17P   | 2.3343513  | 0.73624021 | 0.52040198 | NA        | ABCA17P | ABCA17P   |

|           |            |            |            |    |           |           |
|-----------|------------|------------|------------|----|-----------|-----------|
| ABCC8     | 2.4328791  | 0.76046742 | 0.52040198 | NA | NA        | ABCC8     |
| ADK       | -2.1302733 | 1.31924955 | 0.52040198 | NA | NA        | ADK       |
| AHI1      | -1.9220662 | 1.18209537 | 0.52040198 | NA | NA        | AHI1      |
| ANKRD42   | 2.2749257  | 0.82264758 | 0.52040198 | NA | NA        | ANKRD42   |
| ANP32A    | -2.0033225 | 1.22966807 | 0.52040198 | NA | NA        | ANP32A    |
| ANXA2     | -1.9997924 | 1.45329543 | 0.52040198 | NA | NA        | ANXA2     |
| APOD      | 2.2826264  | 0.73716617 | 0.52040198 | NA | NA        | APOD      |
| APOL1     | -1.9121602 | 1.38224102 | 0.52040198 | NA | APOL1     | APOL1     |
| ARFIP1    | -2.1744556 | 1.30306661 | 0.52040198 | NA | NA        | ARFIP1    |
| ARID2     | -2.1601992 | 1.33696186 | 0.52040198 | NA | NA        | ARID2     |
| ATPAF2    | -2.0593733 | 1.23084647 | 0.52040198 | NA | NA        | ATPAF2    |
| BAG3      | -1.9384694 | 1.31468397 | 0.52040198 | NA | NA        | BAG3      |
| BCAS1     | -2.084448  | 1.20803661 | 0.52040198 | NA | NA        | BCAS1     |
| BFSP2     | 2.1901177  | 0.82295316 | 0.52040198 | NA | NA        | BFSP2     |
| BMP2K     | -1.9532441 | 1.16821622 | 0.52040198 | NA | NA        | BMP2K     |
| BMP8A     | 2.1058632  | 0.73990316 | 0.52040198 | NA | NA        | BMP8A     |
| BOK       | 2.3721644  | 0.76793487 | 0.52040198 | NA | NA        | BOK       |
| BRAP      | -2.1352878 | 1.2534199  | 0.52040198 | NA | NA        | BRAP      |
| C11orf57  | -2.0509347 | 1.18894566 | 0.52040198 | NA | NA        | C11orf57  |
| C14orf178 | 2.1092287  | 0.78711472 | 0.52040198 | NA | C14orf178 | C14orf178 |
| C15orf61  | -1.9751662 | 1.23347746 | 0.52040198 | NA | NA        | C15orf61  |
| C17orf86  | -2.0339511 | 1.26658073 | 0.52040198 | NA | NA        | C17orf86  |
| C1orf27   | -1.974642  | 1.30984575 | 0.52040198 | NA | NA        | C1orf27   |
| C21orf49  | 2.4976927  | 0.79183242 | 0.52040198 | NA | NA        | C21orf49  |
| C2orf42   | -1.8927023 | 1.20108286 | 0.52040198 | NA | NA        | C2orf42   |
| C3orf17   | -1.9128026 | 1.21356318 | 0.52040198 | NA | C3orf17   | C3orf17   |
| C3orf57   | -1.8893237 | 1.19816256 | 0.52040198 | NA | NA        | C3orf57   |
| C7orf51   | -2.1071945 | 1.33640561 | 0.52040198 | NA | NA        | C7orf51   |
| CACNG2    | 2.4539067  | 0.79018397 | 0.52040198 | NA | NA        | CACNG2    |
| CAMK2N1   | -2.068048  | 1.26749433 | 0.52040198 | NA | NA        | CAMK2N1   |
| CAPN8     | 2.062243   | 0.73588244 | 0.52040198 | NA | NA        | CAPN8     |
| CC2D2B    | 2.3528731  | 0.65284613 | 0.52040198 | NA | NA        | CC2D2B    |
| CCDC125   | -2.1515828 | 1.23519787 | 0.52040198 | NA | NA        | CCDC125   |
| CCDC140   | 2.1053809  | 0.80331706 | 0.52040198 | NA | NA        | CCDC140   |
| CCDC28A   | -2.1309696 | 1.26417516 | 0.52040198 | NA | NA        | CCDC28A   |
| CD47      | -1.9775249 | 1.21294482 | 0.52040198 | NA | CD47      | CD47      |
| CDC42     | 2.1906733  | 0.81494459 | 0.52040198 | NA | CDC42     | CDC42     |
| CECR1     | 2.2627415  | 0.76025114 | 0.52040198 | NA | NA        | CECR1     |
| CEP110    | -2.1125622 | 1.19484619 | 0.52040198 | NA | NA        | CEP110    |
| CHEK2     | 2.114179   | 0.78587628 | 0.52040198 | NA | NA        | CHEK2     |
| CLDN16    | 2.3310751  | 0.79347685 | 0.52040198 | NA | NA        | CLDN16    |
| CLN5      | -1.9063071 | 1.27256393 | 0.52040198 | NA | CLN5      | CLN5      |
| COL4A1    | -2.0671428 | 1.22169476 | 0.52040198 | NA | COL4A1    | COL4A1    |
| COL9A2    | 2.1659016  | 0.70015242 | 0.52040198 | NA | NA        | COL9A2    |
| COX15     | -1.9051802 | 1.2085638  | 0.52040198 | NA | NA        | COX15     |
| CPXM2     | 2.1325825  | 0.86026774 | 0.52040198 | NA | NA        | CPXM2     |
| CST7      | 2.3033608  | 0.78005281 | 0.52040198 | NA | NA        | CST7      |
| CTSC      | -2.1849962 | 1.37608816 | 0.52040198 | NA | NA        | CTSC      |
| CTTNBP2   | -2.1819356 | 1.25458024 | 0.52040198 | NA | NA        | CTTNBP2   |
| CXorf38   | -2.0975988 | 1.39567315 | 0.52040198 | NA | NA        | CXorf38   |
| CXorf59   | 2.0504571  | 0.78277683 | 0.52040198 | NA | NA        | CXorf59   |
| DCST1     | 2.1424342  | 0.71034187 | 0.52040198 | NA | NA        | DCST1     |
| DEGS1     | -2.072779  | 1.1858773  | 0.52040198 | NA | NA        | DEGS1     |
| DEXI      | 2.1112593  | 0.83873045 | 0.52040198 | NA | DEXI      | DEXI      |
| DHTKD1    | -2.0802506 | 1.22301036 | 0.52040198 | NA | NA        | DHTKD1    |
| DNAH7     | 2.41911    | 0.70773173 | 0.52040198 | NA | NA        | DNAH7     |
| DNAJC5G   | 2.0911647  | 0.71262761 | 0.52040198 | NA | NA        | DNAJC5G   |
| EFHB      | -1.9809965 | 1.37724656 | 0.52040198 | NA | NA        | EFHB      |

|          |            |            |            |    |          |          |
|----------|------------|------------|------------|----|----------|----------|
| EIF2C3   | -2.0435392 | 1.34298354 | 0.52040198 | NA | NA       | EIF2C3   |
| EIF2S3   | -1.9601947 | 1.16509672 | 0.52040198 | NA | EIF2S3   | EIF2S3   |
| EIF3G    | -2.2129915 | 1.18242727 | 0.52040198 | NA | NA       | EIF3G    |
| EIF5B    | -2.0811152 | 1.23309634 | 0.52040198 | NA | NA       | EIF5B    |
| EMILIN3  | 2.2222533  | 0.73846615 | 0.52040198 | NA | NA       | EMILIN3  |
| ERAP2    | -2.1155597 | 1.16759146 | 0.52040198 | NA | NA       | ERAP2    |
| ERP44    | -2.024124  | 1.18241014 | 0.52040198 | NA | NA       | ERP44    |
| FAM122A  | -1.9726457 | 1.17223446 | 0.52040198 | NA | NA       | FAM122A  |
| FAM131C  | 2.1503249  | 0.82193538 | 0.52040198 | NA | NA       | FAM131C  |
| FAM150B  | 2.0544744  | 0.70944555 | 0.52040198 | NA | NA       | FAM150B  |
| FAM186B  | 2.1947687  | 0.78534665 | 0.52040198 | NA | NA       | FAM186B  |
| FAM35A   | -2.1911292 | 1.24569496 | 0.52040198 | NA | NA       | FAM35A   |
| FARSB    | -2.0363338 | 1.38382939 | 0.52040198 | NA | NA       | FARSB    |
| FBN1     | -2.2223297 | 1.35000795 | 0.52040198 | NA | NA       | FBN1     |
| FER      | -2.0464847 | 1.36356216 | 0.52040198 | NA | NA       | FER      |
| FGL2     | -2.0653139 | 1.59204968 | 0.52040198 | NA | NA       | FGL2     |
| FLJ39653 | -2.0964844 | 1.20766404 | 0.52040198 | NA | FLJ39653 | FLJ39653 |
| GABRB2   | 2.371876   | 0.68809537 | 0.52040198 | NA | NA       | GABRB2   |
| GAR1     | -2.1861567 | 1.23255098 | 0.52040198 | NA | NA       | GAR1     |
| GATAD1   | -2.0920612 | 1.22377274 | 0.52040198 | NA | NA       | GATAD1   |
| GEMIN8   | -2.1429039 | 1.22834499 | 0.52040198 | NA | NA       | GEMIN8   |
| GHRHR    | 2.0826463  | 0.74904975 | 0.52040198 | NA | NA       | GHRHR    |
| GIMAP2   | -2.0266119 | 1.33596833 | 0.52040198 | NA | NA       | GIMAP2   |
| GLT8D2   | -1.8940871 | 1.25220948 | 0.52040198 | NA | NA       | GLT8D2   |
| GLTP     | -1.9432979 | 1.25181329 | 0.52040198 | NA | NA       | GLTP     |
| GNAL     | -2.0080944 | 1.86789974 | 0.52040198 | NA | NA       | GNAL     |
| GNG10    | -2.0686584 | 1.27356848 | 0.52040198 | NA | NA       | GNG10    |
| GNPDA1   | -2.0278047 | 1.20704513 | 0.52040198 | NA | NA       | GNPDA1   |
| GNPNAT1  | -2.125466  | 1.17206348 | 0.52040198 | NA | NA       | GNPNAT1  |
| GPC1     | 2.1876605  | 0.78278178 | 0.52040198 | NA | NA       | GPC1     |
| GPR83    | -1.9193755 | 1.41579111 | 0.52040198 | NA | NA       | GPR83    |
| GPR89B   | -2.0351575 | 1.17692447 | 0.52040198 | NA | NA       | GPR89B   |
| GRB7     | 2.1377094  | 0.7432128  | 0.52040198 | NA | NA       | GRB7     |
| GSTO2    | 2.2568222  | 0.69059817 | 0.52040198 | NA | NA       | GSTO2    |
| GTF2H1   | -1.8994516 | 1.16105061 | 0.52040198 | NA | NA       | GTF2H1   |
| HBP1     | -1.9735302 | 1.26538923 | 0.52040198 | NA | NA       | HBP1     |
| HEATR5A  | -1.902767  | 1.34983554 | 0.52040198 | NA | NA       | HEATR5A  |
| HIBADH   | -1.9814384 | 1.21161046 | 0.52040198 | NA | NA       | HIBADH   |
| HINT3    | -1.9441384 | 1.60393052 | 0.52040198 | NA | NA       | HINT3    |
| HMGCR    | 2.0532203  | 0.86415929 | 0.52040198 | NA | NA       | HMGCR    |
| HS3ST4   | -1.889094  | 1.23721883 | 0.52040198 | NA | HS3ST4   | HS3ST4   |
| HSD11B2  | 2.2925167  | 0.72482175 | 0.52040198 | NA | NA       | HSD11B2  |
| HSDL2    | -1.8965978 | 1.29385895 | 0.52040198 | NA | HSDL2    | HSDL2    |
| HTATIP2  | 2.0700273  | 0.79864545 | 0.52040198 | NA | NA       | HTATIP2  |
| ICOS     | 2.4927746  | 0.75229582 | 0.52040198 | NA | ICOS     | ICOS     |
| IDH2     | -2.0983052 | 1.21860617 | 0.52040198 | NA | IDH2     | IDH2     |
| INTS9    | -2.0402097 | 1.16961044 | 0.52040198 | NA | NA       | INTS9    |
| ISLR2    | -1.9758955 | 1.33074964 | 0.52040198 | NA | NA       | ISLR2    |
| ISOC1    | 2.4713551  | 0.77933133 | 0.52040198 | NA | NA       | ISOC1    |
| KCTD16   | 2.354395   | 0.60252427 | 0.52040198 | NA | NA       | KCTD16   |
| KIAA0090 | -2.1808647 | 1.23180295 | 0.52040198 | NA | NA       | KIAA0090 |
| KIAA0831 | -2.1327187 | 1.19270868 | 0.52040198 | NA | KIAA0831 | KIAA0831 |
| KIAA1586 | -2.1571613 | 1.28117498 | 0.52040198 | NA | NA       | KIAA1586 |
| KIF5A    | -2.0342757 | 1.35590469 | 0.52040198 | NA | NA       | KIF5A    |
| KRT74    | 2.1239248  | 0.77422916 | 0.52040198 | NA | NA       | KRT74    |
| KRT82    | 2.4586007  | 0.73755047 | 0.52040198 | NA | NA       | KRT82    |
| KTELC1   | -2.1984993 | 1.29330049 | 0.52040198 | NA | NA       | KTELC1   |
| LAPTM4B  | -1.9216933 | 1.34113928 | 0.52040198 | NA | NA       | LAPTM4B  |

|              |            |            |            |    |              |              |
|--------------|------------|------------|------------|----|--------------|--------------|
| LHB          | -2.0833171 | 1.28891523 | 0.52040198 | NA | NA           | LHB          |
| LLPH         | -1.999817  | 1.1937156  | 0.52040198 | NA | NA           | LLPH         |
| LMX1A        | 2.4550773  | 0.77172307 | 0.52040198 | NA | NA           | LMX1A        |
| LOC100192378 | 2.4134955  | 0.79027925 | 0.52040198 | NA | LOC100192378 | LOC100192378 |
| LOC144438    | -2.0132641 | 1.26333967 | 0.52040198 | NA | NA           | LOC144438    |
| LOC153328    | 2.4023878  | 0.77768044 | 0.52040198 | NA | NA           | LOC153328    |
| LOC283174    | -2.1237479 | 1.27073276 | 0.52040198 | NA | NA           | LOC283174    |
| LOC340357    | 2.3057571  | 0.73874396 | 0.52040198 | NA | NA           | LOC340357    |
| LOC374491    | -1.9806138 | 1.2798857  | 0.52040198 | NA | NA           | LOC374491    |
| LRRC17       | -1.9927652 | 1.27770681 | 0.52040198 | NA | NA           | LRRC17       |
| LRRC37A2     | 2.1760499  | 0.82621777 | 0.52040198 | NA | NA           | LRRC37A2     |
| LRRC57       | -2.0589527 | 1.30361128 | 0.52040198 | NA | NA           | LRRC57       |
| LSG1         | -1.8904563 | 1.20921704 | 0.52040198 | NA | NA           | LSG1         |
| MAP3K12      | 2.1973903  | 0.81938356 | 0.52040198 | NA | NA           | MAP3K12      |
| MAPK3        | 2.0914245  | 0.85292565 | 0.52040198 | NA | NA           | MAPK3        |
| MAS1         | 2.0962005  | 0.72382428 | 0.52040198 | NA | NA           | MAS1         |
| MB           | 2.27274    | 0.71881396 | 0.52040198 | NA | NA           | MB           |
| MCC          | -2.1187613 | 1.29070636 | 0.52040198 | NA | NA           | MCC          |
| MCPH1        | -2.1621202 | 1.1819172  | 0.52040198 | NA | MCPH1        | MCPH1        |
| MFSD6L       | 2.2174655  | 0.7702194  | 0.52040198 | NA | NA           | MFSD6L       |
| MKKS         | 2.3111227  | 0.77454001 | 0.52040198 | NA | MKKS         | MKKS         |
| MMP16        | -1.9949701 | 1.25948912 | 0.52040198 | NA | NA           | MMP16        |
| MPPED1       | -2.0119839 | 1.21751657 | 0.52040198 | NA | MPPED1       | MPPED1       |
| MRC1         | -2.0059435 | 2.02300477 | 0.52040198 | NA | NA           | MRC1         |
| MRPL2        | -1.902676  | 1.21328046 | 0.52040198 | NA | NA           | MRPL2        |
| MSL2         | -1.9960172 | 1.29359364 | 0.52040198 | NA | NA           | MSL2         |
| MTERF        | -2.1988882 | 1.20543362 | 0.52040198 | NA | NA           | MTERF        |
| MYH10        | -1.9686168 | 1.30885144 | 0.52040198 | NA | NA           | MYH10        |
| NCDN         | 2.4662698  | 0.81990466 | 0.52040198 | NA | NA           | NCDN         |
| NDC80        | -2.0028732 | 1.29395268 | 0.52040198 | NA | NA           | NDC80        |
| NDUFS5       | 2.2017389  | 0.83524493 | 0.52040198 | NA | NA           | NDUFS5       |
| NLN          | -2.1851909 | 1.1969421  | 0.52040198 | NA | NA           | NLN          |
| NOSTRIN      | -2.1178711 | 1.29669248 | 0.52040198 | NA | NA           | NOSTRIN      |
| NSL1         | -2.0645267 | 1.2104069  | 0.52040198 | NA | NA           | NSL1         |
| OMD          | -2.2479875 | 1.87282089 | 0.52040198 | NA | NA           | OMD          |
| ORMDL2       | -1.9860724 | 1.19784337 | 0.52040198 | NA | NA           | ORMDL2       |
| PAFAH1B2     | -1.8806275 | 1.17625486 | 0.52040198 | NA | PAFAH1B2     | PAFAH1B2     |
| PAIP2B       | 2.1305932  | 0.79107342 | 0.52040198 | NA | NA           | PAIP2B       |
| PAPSS2       | -2.2111151 | 1.2575037  | 0.52040198 | NA | NA           | PAPSS2       |
| PCDH11X      | 2.1516949  | 0.84514434 | 0.52040198 | NA | PCDH11X      | PCDH11X      |
| PCDH8        | 2.4071771  | 0.71515048 | 0.52040198 | NA | NA           | PCDH8        |
| PCDHGA1      | 2.307887   | 0.79195605 | 0.52040198 | NA | NA           | PCDHGA1      |
| PCGF6        | -1.885943  | 1.27052744 | 0.52040198 | NA | NA           | PCGF6        |
| PCLO         | 2.1715754  | 0.80619704 | 0.52040198 | NA | NA           | PCLO         |
| PCNXL2       | 2.0737151  | 0.79867141 | 0.52040198 | NA | PCNXL2       | PCNXL2       |
| PCSK6        | 2.4986726  | 0.84049685 | 0.52040198 | NA | NA           | PCSK6        |
| PDE1A        | -2.2262416 | 1.28671827 | 0.52040198 | NA | NA           | PDE1A        |
| PEX26        | -2.1140121 | 1.21066874 | 0.52040198 | NA | NA           | PEX26        |
| PEX5L        | -2.1640812 | 1.24539707 | 0.52040198 | NA | PEX5L        | PEX5L        |
| PGM3         | -2.0435103 | 1.26859256 | 0.52040198 | NA | NA           | PGM3         |
| PLAG1        | -1.9965254 | 1.30066752 | 0.52040198 | NA | NA           | PLAG1        |
| PON1         | 2.0833775  | 0.77710618 | 0.52040198 | NA | NA           | PON1         |
| POP5         | -2.0889906 | 1.233827   | 0.52040198 | NA | NA           | POP5         |
| POU2F2       | -1.9716952 | 1.24277587 | 0.52040198 | NA | NA           | POU2F2       |
| PPM1D        | -2.141691  | 1.23000435 | 0.52040198 | NA | NA           | PPM1D        |
| PPPDE1       | -2.2219879 | 1.26451279 | 0.52040198 | NA | NA           | PPPDE1       |
| PREP         | -1.984032  | 1.275789   | 0.52040198 | NA | PREP         | PREP         |

|          |            |            |            |    |         |          |
|----------|------------|------------|------------|----|---------|----------|
| PRIMA1   | 2.2221399  | 0.74154802 | 0.52040198 | NA | NA      | PRIMA1   |
| PRRX1    | -2.2172145 | 1.3321327  | 0.52040198 | NA | NA      | PRRX1    |
| PSAPL1   | 2.1745227  | 0.79341248 | 0.52040198 | NA | NA      | PSAPL1   |
| PSD3     | 2.261628   | 0.7178862  | 0.52040198 | NA | NA      | PSD3     |
| PSIP1    | -1.991087  | 1.24723292 | 0.52040198 | NA | NA      | PSIP1    |
| QTRTD1   | -1.9218234 | 1.17645254 | 0.52040198 | NA | NA      | QTRTD1   |
| R3HDM2   | -1.8986794 | 1.27911761 | 0.52040198 | NA | NA      | R3HDM2   |
| RAI14    | -1.9661168 | 1.3050944  | 0.52040198 | NA | NA      | RAI14    |
| RANBP3L  | -1.8840796 | 1.21065335 | 0.52040198 | NA | NA      | RANBP3L  |
| RARA     | 2.487077   | 0.76487883 | 0.52040198 | NA | RARA    | RARA     |
| RBKS     | -1.9427115 | 1.24363587 | 0.52040198 | NA | NA      | RBKS     |
| RBM27    | -1.8993699 | 1.21577946 | 0.52040198 | NA | NA      | RBM27    |
| RBMS1    | -2.1281534 | 1.34581448 | 0.52040198 | NA | NA      | RBMS1    |
| RDX      | -2.0118485 | 1.22780659 | 0.52040198 | NA | NA      | RDX      |
| REG3A    | 2.1035545  | 0.83289156 | 0.52040198 | NA | NA      | REG3A    |
| RGS22    | 2.1723     | 0.76006672 | 0.52040198 | NA | NA      | RGS22    |
| RLTPR    | 2.3650698  | 0.79681502 | 0.52040198 | NA | RLTPR   | RLTPR    |
| RNF115   | -2.2382884 | 1.31117258 | 0.52040198 | NA | NA      | RNF115   |
| ROBO3    | 2.3069616  | 0.74089878 | 0.52040198 | NA | ROBO3   | ROBO3    |
| ROD1     | -2.0930953 | 1.32272881 | 0.52040198 | NA | NA      | ROD1     |
| RPP14    | -2.1327202 | 1.32992645 | 0.52040198 | NA | NA      | RPP14    |
| RPS4X    | -2.1992759 | 1.1435872  | 0.52040198 | NA | NA      | RPS4X    |
| RSBN1    | -2.1458921 | 1.19759535 | 0.52040198 | NA | NA      | RSBN1    |
| RSF1     | -2.0162309 | 1.31937541 | 0.52040198 | NA | NA      | RSF1     |
| RUFY3    | -1.9157856 | 1.19877545 | 0.52040198 | NA | RUFY3   | RUFY3    |
| RYK      | -2.1729138 | 1.28586957 | 0.52040198 | NA | NA      | RYK      |
| S100A11  | -2.1809246 | 1.37936479 | 0.52040198 | NA | NA      | S100A11  |
| SAG      | 2.3658024  | 0.75387657 | 0.52040198 | NA | NA      | SAG      |
| SAMD9    | -1.962769  | 1.22384576 | 0.52040198 | NA | NA      | SAMD9    |
| SCRN3    | -2.102817  | 1.23760316 | 0.52040198 | NA | SCRN3   | SCRN3    |
| SDCCAG1  | -2.0260314 | 1.17062402 | 0.52040198 | NA | NA      | SDCCAG1  |
| SERPINB8 | 2.1704807  | 0.7920756  | 0.52040198 | NA | NA      | SERPINB8 |
| SETD1A   | -2.0067014 | 1.23141286 | 0.52040198 | NA | NA      | SETD1A   |
| SHFM1    | -2.0231735 | 1.21727741 | 0.52040198 | NA | NA      | SHFM1    |
| SHROOM4  | -2.1155196 | 1.19954957 | 0.52040198 | NA | NA      | SHROOM4  |
| SIPA1L1  | -2.0250012 | 1.19199125 | 0.52040198 | NA | SIPA1L1 | SIPA1L1  |
| SLA      | -2.0851739 | 1.25234599 | 0.52040198 | NA | NA      | SLA      |
| SLC12A5  | 2.2462063  | 0.81191818 | 0.52040198 | NA | NA      | SLC12A5  |
| SLC16A7  | -2.1144529 | 1.4193732  | 0.52040198 | NA | SLC16A7 | SLC16A7  |
| SLC25A14 | -2.1189443 | 1.20191495 | 0.52040198 | NA | NA      | SLC25A14 |
| SLC29A3  | 2.3957502  | 0.77489056 | 0.52040198 | NA | SLC29A3 | SLC29A3  |
| SLC31A2  | -1.974387  | 1.32182763 | 0.52040198 | NA | NA      | SLC31A2  |
| SLC39A10 | 2.2087944  | 0.83672299 | 0.52040198 | NA | NA      | SLC39A10 |
| SLC4A7   | -2.1984199 | 1.31180157 | 0.52040198 | NA | NA      | SLC4A7   |
| SNORA57  | 2.2363773  | 0.75239695 | 0.52040198 | NA | NA      | SNORA57  |
| SNRNP27  | -2.0354463 | 1.18932417 | 0.52040198 | NA | NA      | SNRNP27  |
| SOSTDC1  | 2.3612779  | 0.72786663 | 0.52040198 | NA | NA      | SOSTDC1  |
| SPNS3    | 2.1222548  | 0.70307546 | 0.52040198 | NA | NA      | SPNS3    |
| SS18     | -1.9681358 | 1.22695495 | 0.52040198 | NA | SS18    | SS18     |
| STAM     | 2.279432   | 0.84229943 | 0.52040198 | NA | NA      | STAM     |
| STRN3    | -2.1987479 | 1.27517342 | 0.52040198 | NA | NA      | STRN3    |
| SUMF1    | -2.1038277 | 1.21929102 | 0.52040198 | NA | SUMF1   | SUMF1    |
| TAF13    | -2.0862826 | 1.39718788 | 0.52040198 | NA | NA      | TAF13    |
| TFAM     | -2.2124488 | 1.29583364 | 0.52040198 | NA | NA      | TFAM     |
| TFDP3    | 2.2307515  | 0.76327553 | 0.52040198 | NA | TFDP3   | TFDP3    |
| TFPI2    | -1.9400506 | 1.14045646 | 0.52040198 | NA | NA      | TFPI2    |
| TIMP3    | -2.0849439 | 1.2966405  | 0.52040198 | NA | NA      | TIMP3    |
| TJP1     | -1.9522857 | 1.19967294 | 0.52040198 | NA | NA      | TJP1     |

|          |            |            |            |        |          |          |
|----------|------------|------------|------------|--------|----------|----------|
| TLR2     | 2.109616   | 0.7260496  | 0.52040198 | NA     | NA       | TLR2     |
| TLX3     | 2.0933695  | 0.74356216 | 0.52040198 | NA     | NA       | TLX3     |
| TMCC1    | -1.975072  | 1.16245899 | 0.52040198 | NA     | TMCC1    | TMCC1    |
| TMEM106B | -2.0505189 | 1.30611139 | 0.52040198 | NA     | TMEM106B | TMEM106B |
| TMEM184C | -1.9276261 | 1.22844115 | 0.52040198 | NA     | NA       | TMEM184C |
| TMEM220  | -1.9798549 | 1.27831435 | 0.52040198 | NA     | NA       | TMEM220  |
| TMEM39A  | -2.0776092 | 1.22157921 | 0.52040198 | NA     | NA       | TMEM39A  |
| TNIK     | -1.9259299 | 1.24052773 | 0.52040198 | NA     | NA       | TNIK     |
| TOE1     | -2.007117  | 1.23124864 | 0.52040198 | NA     | NA       | TOE1     |
| TOR1AIP1 | -1.9418099 | 1.27535724 | 0.52040198 | NA     | NA       | TOR1AIP1 |
| TRPM7    | -2.1178918 | 1.19694633 | 0.52040198 | NA     | NA       | TRPM7    |
| TSPAN3   | -1.9084854 | 1.12209829 | 0.52040198 | NA     | NA       | TSPAN3   |
| TTC21A   | 2.1685433  | 0.81430899 | 0.52040198 | NA     | NA       | TTC21A   |
| TTC39B   | -2.1480051 | 1.21699674 | 0.52040198 | NA     | TTC39B   | TTC39B   |
| TWIST1   | -2.1784754 | 1.38715615 | 0.52040198 | NA     | NA       | TWIST1   |
| TWISTNB  | -1.9593813 | 1.23898705 | 0.52040198 | NA     | NA       | TWISTNB  |
| UBE2N    | -1.971055  | 1.15218407 | 0.52040198 | NA     | NA       | UBE2N    |
| UBQLN2   | 2.0551659  | 0.83870165 | 0.52040198 | NA     | NA       | UBQLN2   |
| UBXN7    | -2.1792546 | 1.33298596 | 0.52040198 | NA     | NA       | UBXN7    |
| UTP23    | -2.0043301 | 1.44435443 | 0.52040198 | NA     | NA       | UTP23    |
| VGLL3    | -1.8927667 | 1.23418995 | 0.52040198 | NA     | VGLL3    | VGLL3    |
| VRK1     | -2.0220907 | 1.19558435 | 0.52040198 | NA     | VRK1     | VRK1     |
| WARS2    | -1.9882524 | 1.16512945 | 0.52040198 | NA     | NA       | WARS2    |
| WDR12    | -2.0742806 | 1.17417307 | 0.52040198 | NA     | NA       | WDR12    |
| WIT1     | 2.0830366  | 0.7403525  | 0.52040198 | NA     | NA       | WIT1     |
| XIAP     | -1.9443922 | 1.16880732 | 0.52040198 | NA     | XIAP     | XIAP     |
| YTHDF2   | -2.1610003 | 1.14729333 | 0.52040198 | NA     | NA       | YTHDF2   |
| ZBTB25   | 2.4548182  | 0.67193386 | 0.52040198 | NA     | NA       | ZBTB25   |
| ZBTB80S  | -1.889675  | 1.37315545 | 0.52040198 | NA     | NA       | ZBTB80S  |
| ZC3HAV1  | -2.1859277 | 1.27529601 | 0.52040198 | NA     | NA       | ZC3HAV1  |
| ZCCHC2   | -1.8957973 | 1.26380685 | 0.52040198 | NA     | NA       | ZCCHC2   |
| ZCCHC24  | -2.0265927 | 1.24020817 | 0.52040198 | NA     | NA       | ZCCHC24  |
| ZFP106   | -1.9961314 | 1.17420263 | 0.52040198 | NA     | NA       | ZFP106   |
| ZFP90    | -1.9415611 | 1.17520105 | 0.52040198 | NA     | NA       | ZFP90    |
| ZIC1     | -2.0479031 | 1.37387861 | 0.52040198 | NA     | NA       | ZIC1     |
| ZKSCAN1  | -1.9608204 | 1.19686149 | 0.52040198 | NA     | NA       | ZKSCAN1  |
| ZMYM5    | -1.9307096 | 1.27978372 | 0.52040198 | NA     | NA       | ZMYM5    |
| ZNF226   | -1.9817975 | 1.24942263 | 0.52040198 | NA     | NA       | ZNF226   |
| ZNF461   | -2.0113456 | 1.32811005 | 0.52040198 | NA     | NA       | ZNF461   |
| ZNF485   | -1.8866719 | 1.31103526 | 0.52040198 | NA     | NA       | ZNF485   |
| ZNF567   | -2.1117909 | 1.29733533 | 0.52040198 | NA     | NA       | ZNF567   |
| ZNF8     | -1.9349992 | 1.18664382 | 0.52040198 | NA     | NA       | ZNF8     |
| ORC2L    | -1.9637817 | 1.46302166 | 0.52040198 | ORC2L  | NA       | ORC2L    |
| PAX8     | 2.1322173  | 0.81230924 | 0.52040198 | PAX8   | NA       | PAX8     |
| PLXNA2   | -1.9743795 | 1.4904532  | 0.52040198 | PLXNA2 | PLXNA2   | PLXNA2   |
| TCEA3    | 2.0861038  | 0.79924679 | 0.52040198 | TCEA3  | NA       | TCEA3    |
| TLE4     | -2.2209082 | 1.42075177 | 0.52040198 | TLE4   | TLE4     | TLE4     |
| TMTC2    | -2.1768285 | 1.45902545 | 0.52040198 | TMTC2  | NA       | TMTC2    |
| TXNL1    | -1.9519404 | 1.29571028 | 0.52040198 | TXNL1  | NA       | TXNL1    |
| ZBBX     | 2.4536853  | 0.74870382 | 0.52040198 | ZBBX   | NA       | ZBBX     |

## MAR-HAR 17vs19 q<0.01

| SYMBOL | 17vs19.d  | 17vs19.FC | 17vs19.q | HAR | CAR  | MAR  |
|--------|-----------|-----------|----------|-----|------|------|
| AHCY   | 3.8216127 | 0.6616698 | 0        | NA  | AHCY | AHCY |

|           |            |            |   |    |           |           |
|-----------|------------|------------|---|----|-----------|-----------|
| ALDH1A2   | -2.9144595 | 1.37007936 | 0 | NA | ALDH1A2   | ALDH1A2   |
| ANXA3     | -3.0609158 | 1.75438391 | 0 | NA | ANXA3     | ANXA3     |
| C17orf97  | -3.4256608 | 1.89055616 | 0 | NA | C17orf97  | C17orf97  |
| CDH5      | -2.9995755 | 1.29949249 | 0 | NA | CDH5      | CDH5      |
| DDX3Y     | 16.876416  | 0.17718856 | 0 | NA | DDX3Y     | DDX3Y     |
| FABP2     | -3.1328576 | 1.50995037 | 0 | NA | FABP2     | FABP2     |
| FMNL2     | -2.7567558 | 1.43286398 | 0 | NA | FMNL2     | FMNL2     |
| GJA1      | -3.1733784 | 2.19155709 | 0 | NA | GJA1      | GJA1      |
| HBA1      | -4.1478687 | 2.17084113 | 0 | NA | HBA1      | HBA1      |
| HBM       | -3.4403808 | 2.1078457  | 0 | NA | HBM       | HBM       |
| HEATR3    | -3.6981394 | 1.7535573  | 0 | NA | HEATR3    | HEATR3    |
| LBH       | -3.1891558 | 1.3292535  | 0 | NA | LBH       | LBH       |
| LMNB1     | -3.4886148 | 1.61615901 | 0 | NA | LMNB1     | LMNB1     |
| LOC728411 | 3.7763355  | 0.60805245 | 0 | NA | LOC728411 | LOC728411 |
| LRP1      | 3.4631467  | 0.73756441 | 0 | NA | LRP1      | LRP1      |
| MAP9      | -5.3005398 | 1.91553803 | 0 | NA | MAP9      | MAP9      |
| MCM4      | -2.715579  | 1.29650881 | 0 | NA | MCM4      | MCM4      |
| ACP6      | 4.0312994  | 0.65072026 | 0 | NA | NA        | ACP6      |
| AMFR      | -8.7147112 | 2.11275886 | 0 | NA | NA        | AMFR      |
| ASAH2B    | 3.1456685  | 0.69224484 | 0 | NA | NA        | ASAH2B    |
| ATG12     | -2.7573778 | 1.34585972 | 0 | NA | NA        | ATG12     |
| B4GALT5   | -4.2003741 | 1.4674269  | 0 | NA | NA        | B4GALT5   |
| BBX       | -2.725413  | 1.50335278 | 0 | NA | NA        | BBX       |
| BCL11B    | -3.0643644 | 1.39138997 | 0 | NA | NA        | BCL11B    |
| BEND3     | -2.9661982 | 1.24150406 | 0 | NA | NA        | BEND3     |
| BOC       | -2.8068475 | 1.27656318 | 0 | NA | NA        | BOC       |
| C12orf75  | 3.5206713  | 0.67780015 | 0 | NA | NA        | C12orf75  |
| C14orf101 | -3.3229101 | 1.38652116 | 0 | NA | NA        | C14orf101 |
| C17orf75  | -2.9644849 | 1.77741209 | 0 | NA | NA        | C17orf75  |
| C17orf82  | 3.0510839  | 0.71348687 | 0 | NA | NA        | C17orf82  |
| C18orf19  | -3.0628472 | 1.35442251 | 0 | NA | NA        | C18orf19  |
| C1orf156  | -4.0044376 | 1.62573154 | 0 | NA | NA        | C1orf156  |
| C20orf94  | -2.8759556 | 1.3876158  | 0 | NA | NA        | C20orf94  |
| C21orf57  | 7.4867579  | 0.47059106 | 0 | NA | NA        | C21orf57  |
| C2orf74   | -6.9874199 | 1.97745048 | 0 | NA | NA        | C2orf74   |
| C3orf70   | -3.7496884 | 1.67548683 | 0 | NA | NA        | C3orf70   |
| C8orf44   | -2.7352321 | 1.43097518 | 0 | NA | NA        | C8orf44   |
| C8orf59   | -2.7116814 | 1.29717691 | 0 | NA | NA        | C8orf59   |
| CACNB4    | -8.4974559 | 2.93779503 | 0 | NA | NA        | CACNB4    |
| CCDC59    | -3.0452841 | 1.3867423  | 0 | NA | NA        | CCDC59    |
| CCND1     | -4.7674023 | 1.57837942 | 0 | NA | NA        | CCND1     |
| CCNJ      | -3.0257177 | 1.38453169 | 0 | NA | NA        | CCNJ      |
| CDH1      | -3.9085644 | 1.52767902 | 0 | NA | NA        | CDH1      |
| CDKAL1    | -6.8380691 | 1.93235063 | 0 | NA | NA        | CDKAL1    |
| CLDN11    | -2.8676812 | 1.53788098 | 0 | NA | NA        | CLDN11    |
| COL3A1    | -3.5343766 | 1.53911674 | 0 | NA | NA        | COL3A1    |
| CRBN      | -4.4936872 | 1.31982838 | 0 | NA | NA        | CRBN      |
| CRH       | 3.942527   | 0.52240886 | 0 | NA | NA        | CRH       |
| DARC      | 4.2546692  | 0.60437945 | 0 | NA | NA        | DARC      |
| DCN       | -2.7933295 | 1.41786959 | 0 | NA | NA        | DCN       |
| DDX17     | -15.817588 | 9.77010381 | 0 | NA | NA        | DDX17     |
| DEM1      | -4.1108629 | 1.39193028 | 0 | NA | NA        | DEM1      |
| DKK1      | -3.6500275 | 1.68388797 | 0 | NA | NA        | DKK1      |
| DOCK7     | -5.7660623 | 1.62898159 | 0 | NA | NA        | DOCK7     |
| DSP       | -2.7089628 | 1.75689966 | 0 | NA | NA        | DSP       |
| EGR1      | -3.2586722 | 1.70147338 | 0 | NA | NA        | EGR1      |
| EXT1      | -2.7939417 | 1.33590226 | 0 | NA | NA        | EXT1      |
| EYA1      | -3.2278247 | 1.50514894 | 0 | NA | NA        | EYA1      |



|              |            |            |   |    |    |              |
|--------------|------------|------------|---|----|----|--------------|
| FAM110B      | -2.71985   | 1.25767091 | 0 | NA | NA | FAM110B      |
| FAM129A      | -3.7403437 | 1.4648489  | 0 | NA | NA | FAM129A      |
| FAM178B      | 3.3666818  | 0.67561962 | 0 | NA | NA | FAM178B      |
| FAM46C       | -6.0599677 | 2.33991468 | 0 | NA | NA | FAM46C       |
| FAM60A       | -2.842808  | 1.5858925  | 0 | NA | NA | FAM60A       |
| FBLN5        | -2.8513505 | 1.67224398 | 0 | NA | NA | FBLN5        |
| FLJ32063     | 3.4212591  | 0.74778534 | 0 | NA | NA | FLJ32063     |
| FOS          | -3.3201611 | 2.17313695 | 0 | NA | NA | FOS          |
| FUT11        | -3.36033   | 1.34288763 | 0 | NA | NA | FUT11        |
| FZD3         | -4.9729828 | 2.70223052 | 0 | NA | NA | FZD3         |
| GAS2         | -3.0464526 | 1.65391062 | 0 | NA | NA | GAS2         |
| GATC         | -4.9569503 | 1.5386214  | 0 | NA | NA | GATC         |
| GJC1         | -2.8228101 | 1.41752178 | 0 | NA | NA | GJC1         |
| GK3P         | -3.041541  | 1.40839884 | 0 | NA | NA | GK3P         |
| GLCE         | -3.297914  | 1.36107722 | 0 | NA | NA | GLCE         |
| GNG11        | -4.6550523 | 1.60596159 | 0 | NA | NA | GNG11        |
| GNG2         | 3.3049392  | 0.67064371 | 0 | NA | NA | GNG2         |
| GOLGA1       | -2.8694446 | 1.38471146 | 0 | NA | NA | GOLGA1       |
| GPR155       | -2.9358654 | 1.32266431 | 0 | NA | NA | GPR155       |
| GRIN2B       | -2.7893494 | 1.86405719 | 0 | NA | NA | GRIN2B       |
| GSTT1        | 14.567224  | 0.29536778 | 0 | NA | NA | GSTT1        |
| GYPA         | -3.3398883 | 1.50730896 | 0 | NA | NA | GYPA         |
| HADHB        | -3.5500149 | 1.30255086 | 0 | NA | NA | HADHB        |
| HAS3         | -2.7170941 | 1.34573993 | 0 | NA | NA | HAS3         |
| HBB          | -6.0753265 | 3.07303904 | 0 | NA | NA | HBB          |
| HBG1         | -5.0919514 | 2.4485439  | 0 | NA | NA | HBG1         |
| HCG11        | -2.6850125 | 1.46858808 | 0 | NA | NA | HCG11        |
| HEMGN        | -3.7746287 | 2.04436448 | 0 | NA | NA | HEMGN        |
| HLA-DMA      | 4.852325   | 0.47355534 | 0 | NA | NA | HLA-DMA      |
| HMBOX1       | 9.4320641  | 0.24538978 | 0 | NA | NA | HMBOX1       |
| HNRNPA0      | -2.8345414 | 1.2364776  | 0 | NA | NA | HNRNPA0      |
| HSPA2        | -3.2032388 | 1.45747749 | 0 | NA | NA | HSPA2        |
| HTR2A        | -8.5978236 | 3.18105929 | 0 | NA | NA | HTR2A        |
| IMMP1L       | -3.1167623 | 1.36790945 | 0 | NA | NA | IMMP1L       |
| ITGB3BP      | 3.7077098  | 0.66980147 | 0 | NA | NA | ITGB3BP      |
| ITPRIP       | -4.8085233 | 1.38297881 | 0 | NA | NA | ITPRIP       |
| KGFLP2       | -10.258703 | 2.72238842 | 0 | NA | NA | KGFLP2       |
| KIF3A        | -3.0737407 | 1.52727468 | 0 | NA | NA | KIF3A        |
| KLHDC8A      | 4.5112655  | 0.68928407 | 0 | NA | NA | KLHDC8A      |
| KPNB1        | -2.7311651 | 1.28255063 | 0 | NA | NA | KPNB1        |
| LCLAT1       | -4.0539244 | 1.40814788 | 0 | NA | NA | LCLAT1       |
| LMO7         | -2.8636254 | 1.393642   | 0 | NA | NA | LMO7         |
| LOC100129387 | -3.3914122 | 1.61354421 | 0 | NA | NA | LOC100129387 |
| LOC144486    | -2.7714156 | 1.27120705 | 0 | NA | NA | LOC144486    |
| LOC221710    | -2.9769436 | 1.70109375 | 0 | NA | NA | LOC221710    |
| LOC728554    | 3.1656053  | 0.78126995 | 0 | NA | NA | LOC728554    |
| LRCH1        | -2.9817491 | 1.48754686 | 0 | NA | NA | LRCH1        |
| LRRC37A4     | -3.3698976 | 1.68280214 | 0 | NA | NA | LRRC37A4     |
| LSM11        | -3.2322088 | 1.71262628 | 0 | NA | NA | LSM11        |
| LSM2         | -3.2913556 | 1.47098338 | 0 | NA | NA | LSM2         |
| LTF          | 2.9664019  | 0.72724447 | 0 | NA | NA | LTF          |
| LUM          | -3.2260897 | 1.95091755 | 0 | NA | NA | LUM          |
| MAMDC2       | -3.215659  | 1.43587342 | 0 | NA | NA | MAMDC2       |
| MDM4         | 3.0196712  | 0.78043155 | 0 | NA | NA | MDM4         |
| MED6         | -3.3017157 | 1.47041287 | 0 | NA | NA | MED6         |
| METT10D      | -2.7754442 | 1.3206454  | 0 | NA | NA | METT10D      |
| METTL10      | 3.7397373  | 0.69287372 | 0 | NA | NA | METTL10      |

|          |            |            |   |    |    |          |
|----------|------------|------------|---|----|----|----------|
| MFN1     | -4.2921499 | 1.39514778 | 0 | NA | NA | MFN1     |
| MLH3     | -3.3077975 | 1.27531588 | 0 | NA | NA | MLH3     |
| MRPS10   | -2.8214155 | 1.36885454 | 0 | NA | NA | MRPS10   |
| MRPS16   | -3.3590271 | 1.35298982 | 0 | NA | NA | MRPS16   |
| MYOCD    | -3.082473  | 1.36241313 | 0 | NA | NA | MYOCD    |
| NAV2     | -4.3314651 | 1.32226567 | 0 | NA | NA | NAV2     |
| NHSL1    | -3.5147792 | 1.30160174 | 0 | NA | NA | NHSL1    |
| NID2     | -3.5619483 | 1.75737721 | 0 | NA | NA | NID2     |
| NOV      | -2.847625  | 1.70505348 | 0 | NA | NA | NOV      |
| OCLN     | -3.4971851 | 1.51101582 | 0 | NA | NA | OCLN     |
| ODF1     | 4.6347296  | 0.55370102 | 0 | NA | NA | ODF1     |
| PCDHA10  | -2.865924  | 1.36392247 | 0 | NA | NA | PCDHA10  |
| PCSK5    | -3.0316199 | 1.39730482 | 0 | NA | NA | PCSK5    |
| PDGFC    | -4.4359191 | 1.58063729 | 0 | NA | NA | PDGFC    |
| PDGFRL   | -3.5086878 | 2.13452466 | 0 | NA | NA | PDGFRL   |
| PEX7     | -2.8320448 | 1.4155305  | 0 | NA | NA | PEX7     |
| PFDN5    | -4.0513292 | 1.36869283 | 0 | NA | NA | PFDN5    |
| PGCP     | -2.6868551 | 1.3440617  | 0 | NA | NA | PGCP     |
| POLR1A   | -3.0997891 | 1.34305056 | 0 | NA | NA | POLR1A   |
| POLR3E   | -3.0437648 | 1.34474236 | 0 | NA | NA | POLR3E   |
| POMZP3   | 10.36362   | 0.3317839  | 0 | NA | NA | POMZP3   |
| PPIG     | -3.1038205 | 1.48329993 | 0 | NA | NA | PPIG     |
| PROCR    | -3.6552633 | 1.42352553 | 0 | NA | NA | PROCR    |
| PRSS35   | -2.7653919 | 1.76424926 | 0 | NA | NA | PRSS35   |
| PSMB5    | -3.5088104 | 1.32463521 | 0 | NA | NA | PSMB5    |
| PTN      | -3.5390284 | 1.42543178 | 0 | NA | NA | PTN      |
| PTPRS    | -3.3876319 | 1.37662535 | 0 | NA | NA | PTPRS    |
| RCL1     | -3.8249932 | 1.39883248 | 0 | NA | NA | RCL1     |
| RCSD1    | -2.889604  | 1.52154846 | 0 | NA | NA | RCSD1    |
| RHOBTB2  | 3.0460716  | 0.75270106 | 0 | NA | NA | RHOBTB2  |
| RPL14    | -3.225496  | 1.3377925  | 0 | NA | NA | RPL14    |
| RPL27A   | -4.8315189 | 1.57672313 | 0 | NA | NA | RPL27A   |
| RPL38    | -3.7755266 | 1.3614783  | 0 | NA | NA | RPL38    |
| RPS23    | 5.6691597  | 0.65934831 | 0 | NA | NA | RPS23    |
| RPS4Y1   | 34.031146  | 0.01044102 | 0 | NA | NA | RPS4Y1   |
| RWDD2A   | -2.843736  | 1.3185053  | 0 | NA | NA | RWDD2A   |
| SAR1A    | -11.355276 | 3.05639008 | 0 | NA | NA | SAR1A    |
| SDC3     | 3.9075778  | 0.68806994 | 0 | NA | NA | SDC3     |
| SERINC3  | -3.5661646 | 1.45310724 | 0 | NA | NA | SERINC3  |
| SERPINH1 | -3.5150056 | 1.42815054 | 0 | NA | NA | SERPINH1 |
| SETD6    | -3.1832995 | 1.57052209 | 0 | NA | NA | SETD6    |
| SLC20A2  | -2.8595998 | 1.4429525  | 0 | NA | NA | SLC20A2  |
| SLC41A2  | -3.4222912 | 1.39333258 | 0 | NA | NA | SLC41A2  |
| SNAP29   | -6.3300364 | 1.64923889 | 0 | NA | NA | SNAP29   |
| SPARC    | -3.0910308 | 1.34124545 | 0 | NA | NA | SPARC    |
| SPATA5   | -3.2914178 | 1.4958473  | 0 | NA | NA | SPATA5   |
| TBX15    | -3.2246332 | 1.53301564 | 0 | NA | NA | TBX15    |
| TERF1    | -3.228146  | 1.340048   | 0 | NA | NA | TERF1    |
| TMEM100  | -3.0007249 | 1.60591256 | 0 | NA | NA | TMEM100  |
| TMEM106C | -2.9400017 | 1.50954861 | 0 | NA | NA | TMEM106C |
| TMEM159  | -5.3443917 | 2.63754195 | 0 | NA | NA | TMEM159  |
| TMEM169  | -2.7655447 | 1.25706554 | 0 | NA | NA | TMEM169  |
| TMEM178  | -2.6904621 | 1.39217609 | 0 | NA | NA | TMEM178  |
| TMEM33   | -2.6658069 | 1.35762943 | 0 | NA | NA | TMEM33   |
| TNNI3K   | 4.7634285  | 0.57583172 | 0 | NA | NA | TNNI3K   |
| TTC32    | -6.837454  | 1.87150878 | 0 | NA | NA | TTC32    |
| TWSG1    | -2.8596631 | 1.33741803 | 0 | NA | NA | TWSG1    |
| TXN2     | -3.1741458 | 1.30516754 | 0 | NA | NA | TXN2     |

|           |            |            |            |    |           |           |
|-----------|------------|------------|------------|----|-----------|-----------|
| UBE2H     | -2.9120245 | 1.29370931 | 0          | NA | NA        | UBE2H     |
| ULBP2     | 3.235594   | 0.65035909 | 0          | NA | NA        | ULBP2     |
| UPF3A     | -2.8879641 | 1.4299963  | 0          | NA | NA        | UPF3A     |
| USP7      | -3.4224056 | 1.48698682 | 0          | NA | NA        | USP7      |
| USP9Y     | 24.930165  | 0.03392756 | 0          | NA | NA        | USP9Y     |
| VGLL4     | 3.9162699  | 0.49989022 | 0          | NA | NA        | VGLL4     |
| ZFPM2     | -4.5503508 | 1.52778901 | 0          | NA | NA        | ZFPM2     |
| ZNF281    | -3.4402922 | 1.32854507 | 0          | NA | NA        | ZNF281    |
| ZNF33B    | 3.2726387  | 0.53745074 | 0          | NA | NA        | ZNF33B    |
| ZNF410    | -2.9582169 | 1.30315211 | 0          | NA | NA        | ZNF410    |
| ZNF673    | -2.8295142 | 1.35068033 | 0          | NA | NA        | ZNF673    |
| ZNF678    | -7.0487526 | 3.15095782 | 0          | NA | NA        | ZNF678    |
| ZNHIT6    | -2.8517864 | 1.32338501 | 0          | NA | NA        | ZNHIT6    |
| OLFML2B   | -2.7124295 | 1.40929775 | 0          | NA | OLFML2B   | OLFML2B   |
| PCDH11Y   | 3.3331052  | 0.66928933 | 0          | NA | PCDH11Y   | PCDH11Y   |
| PCDHB2    | -3.4170174 | 1.79354433 | 0          | NA | PCDHB2    | PCDHB2    |
| PEX13     | -4.0700533 | 1.51194967 | 0          | NA | PEX13     | PEX13     |
| SLC44A1   | -3.7981917 | 1.47477665 | 0          | NA | SLC44A1   | SLC44A1   |
| SOX21     | 3.5374339  | 0.65163046 | 0          | NA | SOX21     | SOX21     |
| SVIL      | -2.9796019 | 1.44575569 | 0          | NA | SVIL      | SVIL      |
| VAMP3     | -3.8246818 | 1.30583534 | 0          | NA | VAMP3     | VAMP3     |
| WDR86     | 3.2488551  | 0.69935269 | 0          | NA | WDR86     | WDR86     |
| WNK3      | -3.2041129 | 1.50150119 | 0          | NA | WNK3      | WNK3      |
| ZFX       | -2.982037  | 1.46067025 | 0          | NA | ZFX       | ZFX       |
| ZNF217    | -3.8102481 | 1.65942746 | 0          | NA | ZNF217    | ZNF217    |
| AKAP12    | -2.2786081 | 1.22442061 | 0.15408684 | NA | AKAP12    | AKAP12    |
| BMPR1B    | 2.6068905  | 0.57627958 | 0.15408684 | NA | BMPR1B    | BMPR1B    |
| C6orf225  | -2.4203083 | 1.2979177  | 0.15408684 | NA | C6orf225  | C6orf225  |
| CCL2      | -2.4253942 | 1.60984817 | 0.15408684 | NA | CCL2      | CCL2      |
| CTNNB1    | -2.3310371 | 1.55618518 | 0.15408684 | NA | CTNNB1    | CTNNB1    |
| CUL2      | 2.8363592  | 0.7865667  | 0.15408684 | NA | CUL2      | CUL2      |
| DPY19L2   | -2.3058242 | 1.26838212 | 0.15408684 | NA | DPY19L2   | DPY19L2   |
| EIF1AX    | -2.2607281 | 1.24915554 | 0.15408684 | NA | EIF1AX    | EIF1AX    |
| EMCN      | -2.4724299 | 1.31793197 | 0.15408684 | NA | EMCN      | EMCN      |
| EPB41L1   | -2.5552412 | 1.24069766 | 0.15408684 | NA | EPB41L1   | EPB41L1   |
| ESCO1     | -2.5615491 | 1.28333929 | 0.15408684 | NA | ESCO1     | ESCO1     |
| FASTKD2   | -2.439101  | 1.25346273 | 0.15408684 | NA | FASTKD2   | FASTKD2   |
| GLRB      | -2.5792542 | 1.28960532 | 0.15408684 | NA | GLRB      | GLRB      |
| HCCS      | -2.2828589 | 1.20536856 | 0.15408684 | NA | HCCS      | HCCS      |
| HDDC2     | 2.513864   | 0.71840442 | 0.15408684 | NA | HDDC2     | HDDC2     |
| HYI       | -2.5821409 | 1.26010427 | 0.15408684 | NA | HYI       | HYI       |
| KHDRBS2   | -2.310516  | 1.28131427 | 0.15408684 | NA | KHDRBS2   | KHDRBS2   |
| LOC338758 | -2.632777  | 1.41919053 | 0.15408684 | NA | LOC338758 | LOC338758 |
| LOC723809 | 2.8695723  | 0.71704125 | 0.15408684 | NA | LOC723809 | LOC723809 |
| AACS      | 2.7772252  | 0.81928872 | 0.15408684 | NA | NA        | AACS      |
| AASDH     | -2.2837131 | 1.33839499 | 0.15408684 | NA | NA        | AASDH     |
| AASS      | -2.3766554 | 1.24422141 | 0.15408684 | NA | NA        | AASS      |
| ADAMTS5   | -2.5578755 | 1.32124927 | 0.15408684 | NA | NA        | ADAMTS5   |
| ADORA2B   | -2.6464446 | 1.52409042 | 0.15408684 | NA | NA        | ADORA2B   |
| AKAP5     | -2.4516203 | 1.43557392 | 0.15408684 | NA | NA        | AKAP5     |
| ALKBH3    | -2.4735768 | 1.26430568 | 0.15408684 | NA | NA        | ALKBH3    |
| ANGPT2    | -2.3641777 | 1.44208847 | 0.15408684 | NA | NA        | ANGPT2    |
| ANKRD13A  | -2.609523  | 1.27601125 | 0.15408684 | NA | NA        | ANKRD13A  |
| ARFGEF2   | -2.3904299 | 1.20561488 | 0.15408684 | NA | NA        | ARFGEF2   |
| BPNT1     | -2.6408925 | 1.2100756  | 0.15408684 | NA | NA        | BPNT1     |
| BUB3      | -2.4370156 | 1.20337506 | 0.15408684 | NA | NA        | BUB3      |
| C10orf78  | -2.3176742 | 1.3305325  | 0.15408684 | NA | NA        | C10orf78  |
| C14orf118 | -2.3531121 | 1.33016407 | 0.15408684 | NA | NA        | C14orf118 |

|           |            |            |            |    |    |           |
|-----------|------------|------------|------------|----|----|-----------|
| C21orf119 | 2.844505   | 0.67810524 | 0.15408684 | NA | NA | C21orf119 |
| C6orf52   | 2.7647041  | 0.73088546 | 0.15408684 | NA | NA | C6orf52   |
| CASC3     | -2.6647051 | 1.30076511 | 0.15408684 | NA | NA | CASC3     |
| CAST      | -2.4073902 | 1.23782379 | 0.15408684 | NA | NA | CAST      |
| CBX5      | -2.3490675 | 1.38954567 | 0.15408684 | NA | NA | CBX5      |
| CCNT1     | -2.4365363 | 1.58989758 | 0.15408684 | NA | NA | CCNT1     |
| CD302     | -2.5345817 | 1.43298482 | 0.15408684 | NA | NA | CD302     |
| CLSTN2    | -2.4636842 | 1.6788568  | 0.15408684 | NA | NA | CLSTN2    |
| CNIH4     | -2.4647397 | 1.24346588 | 0.15408684 | NA | NA | CNIH4     |
| COL11A1   | -2.4263028 | 1.58502373 | 0.15408684 | NA | NA | COL11A1   |
| COL1A2    | -2.5247003 | 1.53757227 | 0.15408684 | NA | NA | COL1A2    |
| COL21A1   | -2.2715263 | 1.39844564 | 0.15408684 | NA | NA | COL21A1   |
| CPEB3     | -2.3418384 | 1.29947995 | 0.15408684 | NA | NA | CPEB3     |
| CRB1      | 2.7218365  | 0.77834041 | 0.15408684 | NA | NA | CRB1      |
| CSRNP3    | -2.6324874 | 1.77680543 | 0.15408684 | NA | NA | CSRNP3    |
| CTSL1     | -2.5466408 | 1.46599936 | 0.15408684 | NA | NA | CTSL1     |
| CYP1B1    | -2.5728104 | 1.59423958 | 0.15408684 | NA | NA | CYP1B1    |
| DAPK1     | 2.8189297  | 0.76157288 | 0.15408684 | NA | NA | DAPK1     |
| DGAT2     | 2.9155871  | 0.76247906 | 0.15408684 | NA | NA | DGAT2     |
| DGKA      | 2.6749752  | 0.76261627 | 0.15408684 | NA | NA | DGKA      |
| DHRS11    | -2.3061322 | 1.45353867 | 0.15408684 | NA | NA | DHRS11    |
| EFEMP1    | -2.2601246 | 1.512079   | 0.15408684 | NA | NA | EFEMP1    |
| ENDOD1    | -2.6652223 | 1.23841843 | 0.15408684 | NA | NA | ENDOD1    |
| ENTPD4    | -2.2639859 | 1.26243617 | 0.15408684 | NA | NA | ENTPD4    |
| EPC1      | -2.5084281 | 1.27380607 | 0.15408684 | NA | NA | EPC1      |
| ERCC8     | -2.3758432 | 1.20989691 | 0.15408684 | NA | NA | ERCC8     |
| EXOSC2    | -2.507613  | 1.19153459 | 0.15408684 | NA | NA | EXOSC2    |
| FBXW10    | 2.5525607  | 0.7559772  | 0.15408684 | NA | NA | FBXW10    |
| GABRB1    | 2.6685844  | 0.59317539 | 0.15408684 | NA | NA | GABRB1    |
| GALNT1    | -2.5505422 | 1.2497617  | 0.15408684 | NA | NA | GALNT1    |
| GSK3B     | -2.3125855 | 1.8209692  | 0.15408684 | NA | NA | GSK3B     |
| HHAT      | -2.6642639 | 1.37203725 | 0.15408684 | NA | NA | HHAT      |
| HHLA3     | 2.5531852  | 0.84325886 | 0.15408684 | NA | NA | HHLA3     |
| ITIH2     | -2.5172604 | 1.57287272 | 0.15408684 | NA | NA | ITIH2     |
| ITPRIPL2  | -2.2714985 | 1.18882915 | 0.15408684 | NA | NA | ITPRIPL2  |
| KATNA1    | -2.4099145 | 1.20178113 | 0.15408684 | NA | NA | KATNA1    |
| KCNG2     | -2.3943031 | 1.31400163 | 0.15408684 | NA | NA | KCNG2     |
| KIAA1033  | -2.5258399 | 1.4238757  | 0.15408684 | NA | NA | KIAA1033  |
| KIF21A    | -2.5343021 | 1.31543011 | 0.15408684 | NA | NA | KIF21A    |
| KLHL5     | -2.5304512 | 1.28779043 | 0.15408684 | NA | NA | KLHL5     |
| KRT75     | 2.5310171  | 0.83537088 | 0.15408684 | NA | NA | KRT75     |
| LDHAL6A   | 2.7683764  | 0.7212885  | 0.15408684 | NA | NA | LDHAL6A   |
| LOC253039 | -2.2687965 | 1.31648364 | 0.15408684 | NA | NA | LOC253039 |
| LOC344595 | -2.3850471 | 1.28620698 | 0.15408684 | NA | NA | LOC344595 |
| LYVE1     | -2.2907557 | 1.9875599  | 0.15408684 | NA | NA | LYVE1     |
| MALAT1    | -2.6059227 | 1.84262573 | 0.15408684 | NA | NA | MALAT1    |
| MAML3     | -2.2695581 | 1.18278914 | 0.15408684 | NA | NA | MAML3     |
| MAN1A1    | -2.3485979 | 1.47403349 | 0.15408684 | NA | NA | MAN1A1    |
| MARS2     | -2.5238092 | 1.38801805 | 0.15408684 | NA | NA | MARS2     |
| MED1      | -2.6381891 | 1.36884522 | 0.15408684 | NA | NA | MED1      |
| MMGT1     | -2.3779571 | 1.23820151 | 0.15408684 | NA | NA | MMGT1     |
| MRC2      | -2.6443084 | 1.27734229 | 0.15408684 | NA | NA | MRC2      |
| NCAPG     | -2.3366229 | 1.38654065 | 0.15408684 | NA | NA | NCAPG     |
| NEK10     | -2.2733071 | 1.3437932  | 0.15408684 | NA | NA | NEK10     |
| NEK11     | 2.6425471  | 0.83268837 | 0.15408684 | NA | NA | NEK11     |
| OLFML3    | -2.5775999 | 1.68013647 | 0.15408684 | NA | NA | OLFML3    |
| PBLD      | -2.3296979 | 1.38976503 | 0.15408684 | NA | NA | PBLD      |
| PEX3      | -2.3367843 | 1.24747703 | 0.15408684 | NA | NA | PEX3      |

|           |            |            |            |    |           |           |
|-----------|------------|------------|------------|----|-----------|-----------|
| PHAX      | -2.6002356 | 1.26474595 | 0.15408684 | NA | NA        | PHAX      |
| PIGF      | -2.5599996 | 1.22772039 | 0.15408684 | NA | NA        | PIGF      |
| PITRM1    | 2.7774431  | 0.78930237 | 0.15408684 | NA | NA        | PITRM1    |
| PNOC      | 2.5737188  | 0.75599796 | 0.15408684 | NA | NA        | PNOC      |
| PNPLA8    | -2.3946008 | 1.24409588 | 0.15408684 | NA | NA        | PNPLA8    |
| PPIB      | -2.3549659 | 1.28657741 | 0.15408684 | NA | NA        | PPIB      |
| PRMT8     | -2.3041096 | 1.2286679  | 0.15408684 | NA | NA        | PRMT8     |
| PRPF39    | -2.3193488 | 1.47045554 | 0.15408684 | NA | NA        | PRPF39    |
| PTCD3     | -2.3290937 | 1.20928246 | 0.15408684 | NA | NA        | PTCD3     |
| RASA2     | -2.3064891 | 1.37965524 | 0.15408684 | NA | NA        | RASA2     |
| RBMS3     | -2.5382434 | 1.17434759 | 0.15408684 | NA | NA        | RBMS3     |
| RPGRIP1L  | -2.2612711 | 1.2759607  | 0.15408684 | NA | NA        | RPGRIP1L  |
| RPP25     | 2.9209582  | 0.75889774 | 0.15408684 | NA | NA        | RPP25     |
| SCARNA2   | 2.7205174  | 0.69920881 | 0.15408684 | NA | NA        | SCARNA2   |
| SEC31A    | -2.4401949 | 1.27613832 | 0.15408684 | NA | NA        | SEC31A    |
| SENP8     | -2.3818281 | 1.17602863 | 0.15408684 | NA | NA        | SENP8     |
| SFRS12IP1 | -2.3118187 | 1.28184605 | 0.15408684 | NA | NA        | SFRS12IP1 |
| SIAH3     | -2.5901526 | 1.8345651  | 0.15408684 | NA | NA        | SIAH3     |
| SLC35B3   | -2.2959573 | 1.31271787 | 0.15408684 | NA | NA        | SLC35B3   |
| SMURF2    | -2.263931  | 1.37802813 | 0.15408684 | NA | NA        | SMURF2    |
| SOAT2     | 2.5770608  | 0.73759794 | 0.15408684 | NA | NA        | SOAT2     |
| SRL       | -2.5935564 | 1.28325817 | 0.15408684 | NA | NA        | SRL       |
| TAOK1     | -2.4294969 | 1.56100579 | 0.15408684 | NA | NA        | TAOK1     |
| TCL1A     | 2.7836999  | 0.79808427 | 0.15408684 | NA | NA        | TCL1A     |
| TRAPPC5   | -2.4614767 | 1.30937375 | 0.15408684 | NA | NA        | TRAPPC5   |
| TRIM69    | -2.3625574 | 1.46343493 | 0.15408684 | NA | NA        | TRIM69    |
| TUBB6     | -2.3299468 | 1.45598407 | 0.15408684 | NA | NA        | TUBB6     |
| UHRF1     | -2.5674501 | 1.3798915  | 0.15408684 | NA | NA        | UHRF1     |
| VDAC3     | -2.4883873 | 1.21200174 | 0.15408684 | NA | NA        | VDAC3     |
| VPS29     | -2.4892411 | 1.22026069 | 0.15408684 | NA | NA        | VPS29     |
| WDFY1     | -2.3148448 | 1.31487986 | 0.15408684 | NA | NA        | WDFY1     |
| ZCCHC6    | -2.4770813 | 1.23305412 | 0.15408684 | NA | NA        | ZCCHC6    |
| ZEB1      | -2.4675301 | 1.41869147 | 0.15408684 | NA | NA        | ZEB1      |
| ZIC2      | -2.5628214 | 1.55072803 | 0.15408684 | NA | NA        | ZIC2      |
| ZNF2      | -2.3970363 | 1.41933831 | 0.15408684 | NA | NA        | ZNF2      |
| ZNF568    | -2.5273151 | 1.28010059 | 0.15408684 | NA | NA        | ZNF568    |
| ZNF646    | -2.3111948 | 1.33040038 | 0.15408684 | NA | NA        | ZNF646    |
| ZNF827    | -2.4277283 | 1.4249109  | 0.15408684 | NA | NA        | ZNF827    |
| NKAIN2    | -2.4988171 | 1.40672174 | 0.15408684 | NA | NKAIN2    | NKAIN2    |
| PHB       | -2.3630554 | 1.18715953 | 0.15408684 | NA | PHB       | PHB       |
| PHF2      | 2.7253249  | 0.72802401 | 0.15408684 | NA | PHF2      | PHF2      |
| PRPH2     | 2.8264552  | 0.70562354 | 0.15408684 | NA | PRPH2     | PRPH2     |
| RP9       | -2.5188738 | 1.24645567 | 0.15408684 | NA | RP9       | RP9       |
| SSR3      | -2.5990322 | 1.35165952 | 0.15408684 | NA | SSR3      | SSR3      |
| SYPL2     | 2.7515259  | 0.65328867 | 0.15408684 | NA | SYPL2     | SYPL2     |
| TM7SF4    | 2.6204674  | 0.77172555 | 0.15408684 | NA | TM7SF4    | TM7SF4    |
| ZNF326    | -2.3209629 | 1.23916508 | 0.15408684 | NA | ZNF326    | ZNF326    |
| ZNF644    | -2.5407901 | 1.55442586 | 0.15408684 | NA | ZNF644    | ZNF644    |
| ABCA17P   | 2.3343513  | 0.73624021 | 0.52040198 | NA | ABCA17P   | ABCA17P   |
| APOL1     | -1.9121602 | 1.38224102 | 0.52040198 | NA | APOL1     | APOL1     |
| C14orf178 | 2.1092287  | 0.78711472 | 0.52040198 | NA | C14orf178 | C14orf178 |
| C3orf17   | -1.9128026 | 1.21356318 | 0.52040198 | NA | C3orf17   | C3orf17   |
| CD47      | -1.9775249 | 1.21294482 | 0.52040198 | NA | CD47      | CD47      |
| CDC42     | 2.1906733  | 0.81494459 | 0.52040198 | NA | CDC42     | CDC42     |
| CLN5      | -1.9063071 | 1.27256393 | 0.52040198 | NA | CLN5      | CLN5      |
| COL4A1    | -2.0671428 | 1.22169476 | 0.52040198 | NA | COL4A1    | COL4A1    |
| DEXI      | 2.1112593  | 0.83873045 | 0.52040198 | NA | DEXI      | DEXI      |
| EIF2S3    | -1.9601947 | 1.16509672 | 0.52040198 | NA | EIF2S3    | EIF2S3    |

|              |            |            |            |    |              |              |
|--------------|------------|------------|------------|----|--------------|--------------|
| FLJ39653     | -2.0964844 | 1.20766404 | 0.52040198 | NA | FLJ39653     | FLJ39653     |
| HS3ST4       | -1.889094  | 1.23721883 | 0.52040198 | NA | HS3ST4       | HS3ST4       |
| HSDL2        | -1.8965978 | 1.29385895 | 0.52040198 | NA | HSDL2        | HSDL2        |
| ICOS         | 2.4927746  | 0.75229582 | 0.52040198 | NA | ICOS         | ICOS         |
| IDH2         | -2.0983052 | 1.21860617 | 0.52040198 | NA | IDH2         | IDH2         |
| KIAA0831     | -2.1327187 | 1.19270868 | 0.52040198 | NA | KIAA0831     | KIAA0831     |
| LOC100192378 | 2.4134955  | 0.79027925 | 0.52040198 | NA | LOC100192378 | LOC100192378 |
| MCPH1        | -2.1621202 | 1.1819172  | 0.52040198 | NA | MCPH1        | MCPH1        |
| MKKS         | 2.3111227  | 0.77454001 | 0.52040198 | NA | MKKS         | MKKS         |
| MPPED1       | -2.0119839 | 1.21751657 | 0.52040198 | NA | MPPED1       | MPPED1       |
| ABCC8        | 2.4328791  | 0.76046742 | 0.52040198 | NA | NA           | ABCC8        |
| ADK          | -2.1302733 | 1.31924955 | 0.52040198 | NA | NA           | ADK          |
| AHI1         | -1.9220662 | 1.18209537 | 0.52040198 | NA | NA           | AHI1         |
| ANKRD42      | 2.2749257  | 0.82264758 | 0.52040198 | NA | NA           | ANKRD42      |
| ANP32A       | -2.0033225 | 1.22966807 | 0.52040198 | NA | NA           | ANP32A       |
| ANXA2        | -1.9997924 | 1.45329543 | 0.52040198 | NA | NA           | ANXA2        |
| APOD         | 2.2826264  | 0.73716617 | 0.52040198 | NA | NA           | APOD         |
| ARFIP1       | -2.1744556 | 1.30306661 | 0.52040198 | NA | NA           | ARFIP1       |
| ARID2        | -2.1601992 | 1.33696186 | 0.52040198 | NA | NA           | ARID2        |
| ATPAF2       | -2.0593733 | 1.23084647 | 0.52040198 | NA | NA           | ATPAF2       |
| BAG3         | -1.9384694 | 1.31468397 | 0.52040198 | NA | NA           | BAG3         |
| BCAS1        | -2.084448  | 1.20803661 | 0.52040198 | NA | NA           | BCAS1        |
| BFSP2        | 2.1901177  | 0.82295316 | 0.52040198 | NA | NA           | BFSP2        |
| BMP2K        | -1.9532441 | 1.16821622 | 0.52040198 | NA | NA           | BMP2K        |
| BMP8A        | 2.1058632  | 0.73990316 | 0.52040198 | NA | NA           | BMP8A        |
| BOK          | 2.3721644  | 0.76793487 | 0.52040198 | NA | NA           | BOK          |
| BRAP         | -2.1352878 | 1.2534199  | 0.52040198 | NA | NA           | BRAP         |
| C11orf57     | -2.0509347 | 1.18894566 | 0.52040198 | NA | NA           | C11orf57     |
| C15orf61     | -1.9751662 | 1.23347746 | 0.52040198 | NA | NA           | C15orf61     |
| C17orf86     | -2.0339511 | 1.26658073 | 0.52040198 | NA | NA           | C17orf86     |
| C1orf27      | -1.974642  | 1.30984575 | 0.52040198 | NA | NA           | C1orf27      |
| C21orf49     | 2.4976927  | 0.79183242 | 0.52040198 | NA | NA           | C21orf49     |
| C2orf42      | -1.8927023 | 1.20108286 | 0.52040198 | NA | NA           | C2orf42      |
| C3orf57      | -1.8893237 | 1.19816256 | 0.52040198 | NA | NA           | C3orf57      |
| C7orf51      | -2.1071945 | 1.33640561 | 0.52040198 | NA | NA           | C7orf51      |
| CACNG2       | 2.4539067  | 0.79018397 | 0.52040198 | NA | NA           | CACNG2       |
| CAMK2N1      | -2.068048  | 1.26749433 | 0.52040198 | NA | NA           | CAMK2N1      |
| CAPN8        | 2.062243   | 0.73588244 | 0.52040198 | NA | NA           | CAPN8        |
| CC2D2B       | 2.3528731  | 0.65284613 | 0.52040198 | NA | NA           | CC2D2B       |
| CCDC125      | -2.1515828 | 1.23519787 | 0.52040198 | NA | NA           | CCDC125      |
| CCDC140      | 2.1053809  | 0.80331706 | 0.52040198 | NA | NA           | CCDC140      |
| CCDC28A      | -2.1309696 | 1.26417516 | 0.52040198 | NA | NA           | CCDC28A      |
| CECR1        | 2.2627415  | 0.76025114 | 0.52040198 | NA | NA           | CECR1        |
| CEP110       | -2.1125622 | 1.19484619 | 0.52040198 | NA | NA           | CEP110       |
| CHEK2        | 2.114179   | 0.78587628 | 0.52040198 | NA | NA           | CHEK2        |
| CLDN16       | 2.3310751  | 0.79347685 | 0.52040198 | NA | NA           | CLDN16       |
| COL9A2       | 2.1659016  | 0.70015242 | 0.52040198 | NA | NA           | COL9A2       |
| COX15        | -1.9051802 | 1.2085638  | 0.52040198 | NA | NA           | COX15        |
| CPXM2        | 2.1325825  | 0.86026774 | 0.52040198 | NA | NA           | CPXM2        |
| CST7         | 2.3033608  | 0.78005281 | 0.52040198 | NA | NA           | CST7         |
| CTSC         | -2.1849962 | 1.37608816 | 0.52040198 | NA | NA           | CTSC         |
| CTTNBP2      | -2.1819356 | 1.25458024 | 0.52040198 | NA | NA           | CTTNBP2      |
| CXorf38      | -2.0975988 | 1.39567315 | 0.52040198 | NA | NA           | CXorf38      |
| CXorf59      | 2.0504571  | 0.78277683 | 0.52040198 | NA | NA           | CXorf59      |
| DCST1        | 2.1424342  | 0.71034187 | 0.52040198 | NA | NA           | DCST1        |
| DEGS1        | -2.072779  | 1.1858773  | 0.52040198 | NA | NA           | DEGS1        |
| DHTKD1       | -2.0802506 | 1.22301036 | 0.52040198 | NA | NA           | DHTKD1       |

|           |            |            |            |    |    |           |
|-----------|------------|------------|------------|----|----|-----------|
| DNAH7     | 2.41911    | 0.70773173 | 0.52040198 | NA | NA | DNAH7     |
| DNAJC5G   | 2.0911647  | 0.71262761 | 0.52040198 | NA | NA | DNAJC5G   |
| EFHB      | -1.9809965 | 1.37724656 | 0.52040198 | NA | NA | EFHB      |
| EIF2C3    | -2.0435392 | 1.34298354 | 0.52040198 | NA | NA | EIF2C3    |
| EIF3G     | -2.2129915 | 1.18242727 | 0.52040198 | NA | NA | EIF3G     |
| EIF5B     | -2.0811152 | 1.23309634 | 0.52040198 | NA | NA | EIF5B     |
| EMILIN3   | 2.2222533  | 0.73846615 | 0.52040198 | NA | NA | EMILIN3   |
| ERAP2     | -2.1155597 | 1.16759146 | 0.52040198 | NA | NA | ERAP2     |
| ERP44     | -2.024124  | 1.18241014 | 0.52040198 | NA | NA | ERP44     |
| FAM122A   | -1.9726457 | 1.17223446 | 0.52040198 | NA | NA | FAM122A   |
| FAM131C   | 2.1503249  | 0.82193538 | 0.52040198 | NA | NA | FAM131C   |
| FAM150B   | 2.0544744  | 0.70944555 | 0.52040198 | NA | NA | FAM150B   |
| FAM186B   | 2.1947687  | 0.78534665 | 0.52040198 | NA | NA | FAM186B   |
| FAM35A    | -2.1911292 | 1.24569496 | 0.52040198 | NA | NA | FAM35A    |
| FARSB     | -2.0363338 | 1.38382939 | 0.52040198 | NA | NA | FARSB     |
| FBN1      | -2.2223297 | 1.35000795 | 0.52040198 | NA | NA | FBN1      |
| FER       | -2.0464847 | 1.36356216 | 0.52040198 | NA | NA | FER       |
| FGL2      | -2.0653139 | 1.59204968 | 0.52040198 | NA | NA | FGL2      |
| GABRB2    | 2.371876   | 0.68809537 | 0.52040198 | NA | NA | GABRB2    |
| GAR1      | -2.1861567 | 1.23255098 | 0.52040198 | NA | NA | GAR1      |
| GATAD1    | -2.0920612 | 1.22377274 | 0.52040198 | NA | NA | GATAD1    |
| GEMIN8    | -2.1429039 | 1.22834499 | 0.52040198 | NA | NA | GEMIN8    |
| GHRHR     | 2.0826463  | 0.74904975 | 0.52040198 | NA | NA | GHRHR     |
| GIMAP2    | -2.0266119 | 1.33596833 | 0.52040198 | NA | NA | GIMAP2    |
| GLT8D2    | -1.8940871 | 1.25220948 | 0.52040198 | NA | NA | GLT8D2    |
| GLTP      | -1.9432979 | 1.25181329 | 0.52040198 | NA | NA | GLTP      |
| GNAL      | -2.0080944 | 1.86789974 | 0.52040198 | NA | NA | GNAL      |
| GNG10     | -2.0686584 | 1.27356848 | 0.52040198 | NA | NA | GNG10     |
| GNPDA1    | -2.0278047 | 1.20704513 | 0.52040198 | NA | NA | GNPDA1    |
| GNPNAT1   | -2.125466  | 1.17206348 | 0.52040198 | NA | NA | GNPNAT1   |
| GPC1      | 2.1876605  | 0.78278178 | 0.52040198 | NA | NA | GPC1      |
| GPR83     | -1.9193755 | 1.41579111 | 0.52040198 | NA | NA | GPR83     |
| GPR89B    | -2.0351575 | 1.17692447 | 0.52040198 | NA | NA | GPR89B    |
| GRB7      | 2.1377094  | 0.7432128  | 0.52040198 | NA | NA | GRB7      |
| GSTO2     | 2.2568222  | 0.69059817 | 0.52040198 | NA | NA | GSTO2     |
| GTF2H1    | -1.8994516 | 1.16105061 | 0.52040198 | NA | NA | GTF2H1    |
| HBP1      | -1.9735302 | 1.26538923 | 0.52040198 | NA | NA | HBP1      |
| HEATR5A   | -1.902767  | 1.34983554 | 0.52040198 | NA | NA | HEATR5A   |
| HIBADH    | -1.9814384 | 1.21161046 | 0.52040198 | NA | NA | HIBADH    |
| HINT3     | -1.9441384 | 1.60393052 | 0.52040198 | NA | NA | HINT3     |
| HMGCR     | 2.0532203  | 0.86415929 | 0.52040198 | NA | NA | HMGCR     |
| HSD11B2   | 2.2925167  | 0.72482175 | 0.52040198 | NA | NA | HSD11B2   |
| HTATIP2   | 2.0700273  | 0.79864545 | 0.52040198 | NA | NA | HTATIP2   |
| INTS9     | -2.0402097 | 1.16961044 | 0.52040198 | NA | NA | INTS9     |
| ISLR2     | -1.9758955 | 1.33074964 | 0.52040198 | NA | NA | ISLR2     |
| ISOC1     | 2.4713551  | 0.77933133 | 0.52040198 | NA | NA | ISOC1     |
| KCTD16    | 2.354395   | 0.60252427 | 0.52040198 | NA | NA | KCTD16    |
| KIAA0090  | -2.1808647 | 1.23180295 | 0.52040198 | NA | NA | KIAA0090  |
| KIAA1586  | -2.1571613 | 1.28117498 | 0.52040198 | NA | NA | KIAA1586  |
| KIF5A     | -2.0342757 | 1.35590469 | 0.52040198 | NA | NA | KIF5A     |
| KRT74     | 2.1239248  | 0.77422916 | 0.52040198 | NA | NA | KRT74     |
| KRT82     | 2.4586007  | 0.73755047 | 0.52040198 | NA | NA | KRT82     |
| KTELC1    | -2.1984993 | 1.29330049 | 0.52040198 | NA | NA | KTELC1    |
| LAPTM4B   | -1.9216933 | 1.34113928 | 0.52040198 | NA | NA | LAPTM4B   |
| LHB       | -2.0833171 | 1.28891523 | 0.52040198 | NA | NA | LHB       |
| LLPH      | -1.999817  | 1.1937156  | 0.52040198 | NA | NA | LLPH      |
| LMX1A     | 2.4550773  | 0.77172307 | 0.52040198 | NA | NA | LMX1A     |
| LOC144438 | -2.0132641 | 1.26333967 | 0.52040198 | NA | NA | LOC144438 |

|           |            |            |            |    |    |           |
|-----------|------------|------------|------------|----|----|-----------|
| LOC153328 | 2.4023878  | 0.77768044 | 0.52040198 | NA | NA | LOC153328 |
| LOC283174 | -2.1237479 | 1.27073276 | 0.52040198 | NA | NA | LOC283174 |
| LOC340357 | 2.3057571  | 0.73874396 | 0.52040198 | NA | NA | LOC340357 |
| LOC374491 | -1.9806138 | 1.2798857  | 0.52040198 | NA | NA | LOC374491 |
| LRRC17    | -1.9927652 | 1.27770681 | 0.52040198 | NA | NA | LRRC17    |
| LRRC37A2  | 2.1760499  | 0.82621777 | 0.52040198 | NA | NA | LRRC37A2  |
| LRRC57    | -2.0589527 | 1.30361128 | 0.52040198 | NA | NA | LRRC57    |
| LSG1      | -1.8904563 | 1.20921704 | 0.52040198 | NA | NA | LSG1      |
| MAP3K12   | 2.1973903  | 0.81938356 | 0.52040198 | NA | NA | MAP3K12   |
| MAPK3     | 2.0914245  | 0.85292565 | 0.52040198 | NA | NA | MAPK3     |
| MAS1      | 2.0962005  | 0.72382428 | 0.52040198 | NA | NA | MAS1      |
| MB        | 2.27274    | 0.71881396 | 0.52040198 | NA | NA | MB        |
| MCC       | -2.1187613 | 1.29070636 | 0.52040198 | NA | NA | MCC       |
| MFSD6L    | 2.2174655  | 0.7702194  | 0.52040198 | NA | NA | MFSD6L    |
| MMP16     | -1.9949701 | 1.25948912 | 0.52040198 | NA | NA | MMP16     |
| MRC1      | -2.0059435 | 2.02300477 | 0.52040198 | NA | NA | MRC1      |
| MRPL2     | -1.902676  | 1.21328046 | 0.52040198 | NA | NA | MRPL2     |
| MSL2      | -1.9960172 | 1.29359364 | 0.52040198 | NA | NA | MSL2      |
| MTERF     | -2.1988882 | 1.20543362 | 0.52040198 | NA | NA | MTERF     |
| MYH10     | -1.9686168 | 1.30885144 | 0.52040198 | NA | NA | MYH10     |
| NCDN      | 2.4662698  | 0.81990466 | 0.52040198 | NA | NA | NCDN      |
| NDC80     | -2.0028732 | 1.29395268 | 0.52040198 | NA | NA | NDC80     |
| NDUFS5    | 2.2017389  | 0.83524493 | 0.52040198 | NA | NA | NDUFS5    |
| NLN       | -2.1851909 | 1.1969421  | 0.52040198 | NA | NA | NLN       |
| NOSTRIN   | -2.1178711 | 1.29669248 | 0.52040198 | NA | NA | NOSTRIN   |
| NSL1      | -2.0645267 | 1.2104069  | 0.52040198 | NA | NA | NSL1      |
| OMD       | -2.2479875 | 1.87282089 | 0.52040198 | NA | NA | OMD       |
| ORMDL2    | -1.9860724 | 1.19784337 | 0.52040198 | NA | NA | ORMDL2    |
| PAIP2B    | 2.1305932  | 0.79107342 | 0.52040198 | NA | NA | PAIP2B    |
| PAPSS2    | -2.2111151 | 1.2575037  | 0.52040198 | NA | NA | PAPSS2    |
| PCDH8     | 2.4071771  | 0.71515048 | 0.52040198 | NA | NA | PCDH8     |
| PCDHGA1   | 2.307887   | 0.79195605 | 0.52040198 | NA | NA | PCDHGA1   |
| PCGF6     | -1.885943  | 1.27052744 | 0.52040198 | NA | NA | PCGF6     |
| PCLO      | 2.1715754  | 0.80619704 | 0.52040198 | NA | NA | PCLO      |
| PCSK6     | 2.4986726  | 0.84049685 | 0.52040198 | NA | NA | PCSK6     |
| PDE1A     | -2.2262416 | 1.28671827 | 0.52040198 | NA | NA | PDE1A     |
| PEX26     | -2.1140121 | 1.21066874 | 0.52040198 | NA | NA | PEX26     |
| PGM3      | -2.0435103 | 1.26859256 | 0.52040198 | NA | NA | PGM3      |
| PLAG1     | -1.9965254 | 1.30066752 | 0.52040198 | NA | NA | PLAG1     |
| PON1      | 2.0833775  | 0.77710618 | 0.52040198 | NA | NA | PON1      |
| POP5      | -2.0889906 | 1.233827   | 0.52040198 | NA | NA | POP5      |
| POU2F2    | -1.9716952 | 1.24277587 | 0.52040198 | NA | NA | POU2F2    |
| PPM1D     | -2.141691  | 1.23000435 | 0.52040198 | NA | NA | PPM1D     |
| PPPDE1    | -2.2219879 | 1.26451279 | 0.52040198 | NA | NA | PPPDE1    |
| PRIMA1    | 2.2221399  | 0.74154802 | 0.52040198 | NA | NA | PRIMA1    |
| PRRX1     | -2.2172145 | 1.3321327  | 0.52040198 | NA | NA | PRRX1     |
| PSAPL1    | 2.1745227  | 0.79341248 | 0.52040198 | NA | NA | PSAPL1    |
| PSD3      | 2.261628   | 0.7178862  | 0.52040198 | NA | NA | PSD3      |
| PSIP1     | -1.991087  | 1.24723292 | 0.52040198 | NA | NA | PSIP1     |
| QTRTD1    | -1.9218234 | 1.17645254 | 0.52040198 | NA | NA | QTRTD1    |
| R3HDM2    | -1.8986794 | 1.27911761 | 0.52040198 | NA | NA | R3HDM2    |
| RAI14     | -1.9661168 | 1.3050944  | 0.52040198 | NA | NA | RAI14     |
| RANBP3L   | -1.8840796 | 1.21065335 | 0.52040198 | NA | NA | RANBP3L   |
| RBKS      | -1.9427115 | 1.24363587 | 0.52040198 | NA | NA | RBKS      |
| RBM27     | -1.8993699 | 1.21577946 | 0.52040198 | NA | NA | RBM27     |
| RBMS1     | -2.1281534 | 1.34581448 | 0.52040198 | NA | NA | RBMS1     |
| RDX       | -2.0118485 | 1.22780659 | 0.52040198 | NA | NA | RDX       |
| REG3A     | 2.1035545  | 0.83289156 | 0.52040198 | NA | NA | REG3A     |



|          |            |            |            |    |    |          |
|----------|------------|------------|------------|----|----|----------|
| RGS22    | 2.1723     | 0.76006672 | 0.52040198 | NA | NA | RGS22    |
| RNF115   | -2.2382884 | 1.31117258 | 0.52040198 | NA | NA | RNF115   |
| ROD1     | -2.0930953 | 1.32272881 | 0.52040198 | NA | NA | ROD1     |
| RPP14    | -2.1327202 | 1.32992645 | 0.52040198 | NA | NA | RPP14    |
| RPS4X    | -2.1992759 | 1.1435872  | 0.52040198 | NA | NA | RPS4X    |
| RSBN1    | -2.1458921 | 1.19759535 | 0.52040198 | NA | NA | RSBN1    |
| RSF1     | -2.0162309 | 1.31937541 | 0.52040198 | NA | NA | RSF1     |
| RYK      | -2.1729138 | 1.28586957 | 0.52040198 | NA | NA | RYK      |
| S100A11  | -2.1809246 | 1.37936479 | 0.52040198 | NA | NA | S100A11  |
| SAG      | 2.3658024  | 0.75387657 | 0.52040198 | NA | NA | SAG      |
| SAMD9    | -1.962769  | 1.22384576 | 0.52040198 | NA | NA | SAMD9    |
| SDCCAG1  | -2.0260314 | 1.17062402 | 0.52040198 | NA | NA | SDCCAG1  |
| SERPINB8 | 2.1704807  | 0.7920756  | 0.52040198 | NA | NA | SERPINB8 |
| SETD1A   | -2.0067014 | 1.23141286 | 0.52040198 | NA | NA | SETD1A   |
| SHFM1    | -2.0231735 | 1.21727741 | 0.52040198 | NA | NA | SHFM1    |
| SHROOM4  | -2.1155196 | 1.19954957 | 0.52040198 | NA | NA | SHROOM4  |
| SLA      | -2.0851739 | 1.25234599 | 0.52040198 | NA | NA | SLA      |
| SLC12A5  | 2.2462063  | 0.81191818 | 0.52040198 | NA | NA | SLC12A5  |
| SLC25A14 | -2.1189443 | 1.20191495 | 0.52040198 | NA | NA | SLC25A14 |
| SLC31A2  | -1.974387  | 1.32182763 | 0.52040198 | NA | NA | SLC31A2  |
| SLC39A10 | 2.2087944  | 0.83672299 | 0.52040198 | NA | NA | SLC39A10 |
| SLC4A7   | -2.1984199 | 1.31180157 | 0.52040198 | NA | NA | SLC4A7   |
| SNORA57  | 2.2363773  | 0.75239695 | 0.52040198 | NA | NA | SNORA57  |
| SNRNP27  | -2.0354463 | 1.18932417 | 0.52040198 | NA | NA | SNRNP27  |
| SOSTDC1  | 2.3612779  | 0.72786663 | 0.52040198 | NA | NA | SOSTDC1  |
| SPNS3    | 2.1222548  | 0.70307546 | 0.52040198 | NA | NA | SPNS3    |
| STAM     | 2.279432   | 0.84229943 | 0.52040198 | NA | NA | STAM     |
| STRN3    | -2.1987479 | 1.27517342 | 0.52040198 | NA | NA | STRN3    |
| TAF13    | -2.0862826 | 1.39718788 | 0.52040198 | NA | NA | TAF13    |
| TFAM     | -2.2124488 | 1.29583364 | 0.52040198 | NA | NA | TFAM     |
| TFPI2    | -1.9400506 | 1.14045646 | 0.52040198 | NA | NA | TFPI2    |
| TIMP3    | -2.0849439 | 1.2966405  | 0.52040198 | NA | NA | TIMP3    |
| TJP1     | -1.9522857 | 1.19967294 | 0.52040198 | NA | NA | TJP1     |
| TLR2     | 2.109616   | 0.7260496  | 0.52040198 | NA | NA | TLR2     |
| TLX3     | 2.0933695  | 0.74356216 | 0.52040198 | NA | NA | TLX3     |
| TMEM184C | -1.9276261 | 1.22844115 | 0.52040198 | NA | NA | TMEM184C |
| TMEM220  | -1.9798549 | 1.27831435 | 0.52040198 | NA | NA | TMEM220  |
| TMEM39A  | -2.0776092 | 1.22157921 | 0.52040198 | NA | NA | TMEM39A  |
| TNIK     | -1.9259299 | 1.24052773 | 0.52040198 | NA | NA | TNIK     |
| TOE1     | -2.007117  | 1.23124864 | 0.52040198 | NA | NA | TOE1     |
| TOR1AIP1 | -1.9418099 | 1.27535724 | 0.52040198 | NA | NA | TOR1AIP1 |
| TRPM7    | -2.1178918 | 1.19694633 | 0.52040198 | NA | NA | TRPM7    |
| TSPAN3   | -1.9084854 | 1.12209829 | 0.52040198 | NA | NA | TSPAN3   |
| TTC21A   | 2.1685433  | 0.81430899 | 0.52040198 | NA | NA | TTC21A   |
| TWIST1   | -2.1784754 | 1.38715615 | 0.52040198 | NA | NA | TWIST1   |
| TWISTNB  | -1.9593813 | 1.23898705 | 0.52040198 | NA | NA | TWISTNB  |
| UBE2N    | -1.971055  | 1.15218407 | 0.52040198 | NA | NA | UBE2N    |
| UBQLN2   | 2.0551659  | 0.83870165 | 0.52040198 | NA | NA | UBQLN2   |
| UBXN7    | -2.1792546 | 1.33298596 | 0.52040198 | NA | NA | UBXN7    |
| UTP23    | -2.0043301 | 1.44435443 | 0.52040198 | NA | NA | UTP23    |
| WARS2    | -1.9882524 | 1.16512945 | 0.52040198 | NA | NA | WARS2    |
| WDR12    | -2.0742806 | 1.17417307 | 0.52040198 | NA | NA | WDR12    |
| WIT1     | 2.0830366  | 0.7403525  | 0.52040198 | NA | NA | WIT1     |
| YTHDF2   | -2.1610003 | 1.14729333 | 0.52040198 | NA | NA | YTHDF2   |
| ZBTB25   | 2.4548182  | 0.67193386 | 0.52040198 | NA | NA | ZBTB25   |
| ZBTB80S  | -1.889675  | 1.37315545 | 0.52040198 | NA | NA | ZBTB80S  |
| ZC3HAV1  | -2.1859277 | 1.27529601 | 0.52040198 | NA | NA | ZC3HAV1  |
| ZCCHC2   | -1.8957973 | 1.26380685 | 0.52040198 | NA | NA | ZCCHC2   |

|          |            |            |            |    |          |          |
|----------|------------|------------|------------|----|----------|----------|
| ZCCHC24  | -2.0265927 | 1.24020817 | 0.52040198 | NA | NA       | ZCCHC24  |
| ZFP106   | -1.9961314 | 1.17420263 | 0.52040198 | NA | NA       | ZFP106   |
| ZFP90    | -1.9415611 | 1.17520105 | 0.52040198 | NA | NA       | ZFP90    |
| ZIC1     | -2.0479031 | 1.37387861 | 0.52040198 | NA | NA       | ZIC1     |
| ZKSCAN1  | -1.9608204 | 1.19686149 | 0.52040198 | NA | NA       | ZKSCAN1  |
| ZMYM5    | -1.9307096 | 1.27978372 | 0.52040198 | NA | NA       | ZMYM5    |
| ZNF226   | -1.9817975 | 1.24942263 | 0.52040198 | NA | NA       | ZNF226   |
| ZNF461   | -2.0113456 | 1.32811005 | 0.52040198 | NA | NA       | ZNF461   |
| ZNF485   | -1.8866719 | 1.31103526 | 0.52040198 | NA | NA       | ZNF485   |
| ZNF567   | -2.1117909 | 1.29733533 | 0.52040198 | NA | NA       | ZNF567   |
| ZNF8     | -1.9349992 | 1.18664382 | 0.52040198 | NA | NA       | ZNF8     |
| PAFAH1B2 | -1.8806275 | 1.17625486 | 0.52040198 | NA | PAFAH1B2 | PAFAH1B2 |
| PCDH11X  | 2.1516949  | 0.84514434 | 0.52040198 | NA | PCDH11X  | PCDH11X  |
| PCNXL2   | 2.0737151  | 0.79867141 | 0.52040198 | NA | PCNXL2   | PCNXL2   |
| PEX5L    | -2.1640812 | 1.24539707 | 0.52040198 | NA | PEX5L    | PEX5L    |
| PREP     | -1.984032  | 1.275789   | 0.52040198 | NA | PREP     | PREP     |
| RARA     | 2.487077   | 0.76487883 | 0.52040198 | NA | RARA     | RARA     |
| RLTPR    | 2.3650698  | 0.79681502 | 0.52040198 | NA | RLTPR    | RLTPR    |
| ROBO3    | 2.3069616  | 0.74089878 | 0.52040198 | NA | ROBO3    | ROBO3    |
| RUFY3    | -1.9157856 | 1.19877545 | 0.52040198 | NA | RUFY3    | RUFY3    |
| SCRN3    | -2.102817  | 1.23760316 | 0.52040198 | NA | SCRN3    | SCRN3    |
| SIPA1L1  | -2.0250012 | 1.19199125 | 0.52040198 | NA | SIPA1L1  | SIPA1L1  |
| SLC16A7  | -2.1144529 | 1.4193732  | 0.52040198 | NA | SLC16A7  | SLC16A7  |
| SLC29A3  | 2.3957502  | 0.77489056 | 0.52040198 | NA | SLC29A3  | SLC29A3  |
| SS18     | -1.9681358 | 1.22695495 | 0.52040198 | NA | SS18     | SS18     |
| SUMF1    | -2.1038277 | 1.21929102 | 0.52040198 | NA | SUMF1    | SUMF1    |
| TFDP3    | 2.2307515  | 0.76327553 | 0.52040198 | NA | TFDP3    | TFDP3    |
| TMCC1    | -1.975072  | 1.16245899 | 0.52040198 | NA | TMCC1    | TMCC1    |
| TMEM106B | -2.0505189 | 1.30611139 | 0.52040198 | NA | TMEM106B | TMEM106B |
| TTC39B   | -2.1480051 | 1.21699674 | 0.52040198 | NA | TTC39B   | TTC39B   |
| VGLL3    | -1.8927667 | 1.23418995 | 0.52040198 | NA | VGLL3    | VGLL3    |
| VRK1     | -2.0220907 | 1.19558435 | 0.52040198 | NA | VRK1     | VRK1     |
| XIAP     | -1.9443922 | 1.16880732 | 0.52040198 | NA | XIAP     | XIAP     |

## **MAR only 17vs19 q<0.01**

| <b>SYMBOL</b> | <b>17vs19.d</b> | <b>17vs19.FC</b> | <b>17vs19.q</b> | <b>HAR</b> | <b>CAR</b> | <b>MAR</b> |
|---------------|-----------------|------------------|-----------------|------------|------------|------------|
| ACP6          | 4.0312994       | 0.65072026       | 0               | NA         | NA         | ACP6       |
| AMFR          | -8.7147112      | 2.11275886       | 0               | NA         | NA         | AMFR       |
| ASAH2B        | 3.1456685       | 0.69224484       | 0               | NA         | NA         | ASAH2B     |
| ATG12         | -2.7573778      | 1.34585972       | 0               | NA         | NA         | ATG12      |
| B4GALT5       | -4.2003741      | 1.4674269        | 0               | NA         | NA         | B4GALT5    |
| BBX           | -2.725413       | 1.50335278       | 0               | NA         | NA         | BBX        |
| BCL11B        | -3.0643644      | 1.39138997       | 0               | NA         | NA         | BCL11B     |
| BEND3         | -2.9661982      | 1.24150406       | 0               | NA         | NA         | BEND3      |
| BOC           | -2.8068475      | 1.27656318       | 0               | NA         | NA         | BOC        |
| C12orf75      | 3.5206713       | 0.67780015       | 0               | NA         | NA         | C12orf75   |
| C14orf101     | -3.3229101      | 1.38652116       | 0               | NA         | NA         | C14orf101  |
| C17orf75      | -2.9644849      | 1.77741209       | 0               | NA         | NA         | C17orf75   |
| C17orf82      | 3.0510839       | 0.71348687       | 0               | NA         | NA         | C17orf82   |
| C18orf19      | -3.0628472      | 1.35442251       | 0               | NA         | NA         | C18orf19   |
| C1orf156      | -4.0044376      | 1.62573154       | 0               | NA         | NA         | C1orf156   |
| C20orf94      | -2.8759556      | 1.3876158        | 0               | NA         | NA         | C20orf94   |
| C21orf57      | 7.4867579       | 0.47059106       | 0               | NA         | NA         | C21orf57   |
| C2orf74       | -6.9874199      | 1.97745048       | 0               | NA         | NA         | C2orf74    |

|          |            |            |   |    |    |          |
|----------|------------|------------|---|----|----|----------|
| C3orf70  | -3.7496884 | 1.67548683 | 0 | NA | NA | C3orf70  |
| C8orf44  | -2.7352321 | 1.43097518 | 0 | NA | NA | C8orf44  |
| C8orf59  | -2.7116814 | 1.29717691 | 0 | NA | NA | C8orf59  |
| CACNB4   | -8.4974559 | 2.93779503 | 0 | NA | NA | CACNB4   |
| CCDC59   | -3.0452841 | 1.3867423  | 0 | NA | NA | CCDC59   |
| CCND1    | -4.7674023 | 1.57837942 | 0 | NA | NA | CCND1    |
| CCNJ     | -3.0257177 | 1.38453169 | 0 | NA | NA | CCNJ     |
| CDH1     | -3.9085644 | 1.52767902 | 0 | NA | NA | CDH1     |
| CDKAL1   | -6.8380691 | 1.93235063 | 0 | NA | NA | CDKAL1   |
| CLDN11   | -2.8676812 | 1.53788098 | 0 | NA | NA | CLDN11   |
| COL3A1   | -3.5343766 | 1.53911674 | 0 | NA | NA | COL3A1   |
| CRBN     | -4.4936872 | 1.31982838 | 0 | NA | NA | CRBN     |
| CRH      | 3.942527   | 0.52240886 | 0 | NA | NA | CRH      |
| DARC     | 4.2546692  | 0.60437945 | 0 | NA | NA | DARC     |
| DCN      | -2.7933295 | 1.41786959 | 0 | NA | NA | DCN      |
| DDX17    | -15.817588 | 9.77010381 | 0 | NA | NA | DDX17    |
| DEM1     | -4.1108629 | 1.39193028 | 0 | NA | NA | DEM1     |
| DKK1     | -3.6500275 | 1.68388797 | 0 | NA | NA | DKK1     |
| DOCK7    | -5.7660623 | 1.62898159 | 0 | NA | NA | DOCK7    |
| DSP      | -2.7089628 | 1.75689966 | 0 | NA | NA | DSP      |
| EGR1     | -3.2586722 | 1.70147338 | 0 | NA | NA | EGR1     |
| EXT1     | -2.7939417 | 1.33590226 | 0 | NA | NA | EXT1     |
| EYA1     | -3.2278247 | 1.50514894 | 0 | NA | NA | EYA1     |
| FAM110B  | -2.71985   | 1.25767091 | 0 | NA | NA | FAM110B  |
| FAM129A  | -3.7403437 | 1.4648489  | 0 | NA | NA | FAM129A  |
| FAM178B  | 3.3666818  | 0.67561962 | 0 | NA | NA | FAM178B  |
| FAM46C   | -6.0599677 | 2.33991468 | 0 | NA | NA | FAM46C   |
| FAM60A   | -2.842808  | 1.5858925  | 0 | NA | NA | FAM60A   |
| FBLN5    | -2.8513505 | 1.67224398 | 0 | NA | NA | FBLN5    |
| FLJ32063 | 3.4212591  | 0.74778534 | 0 | NA | NA | FLJ32063 |
| FOS      | -3.3201611 | 2.17313695 | 0 | NA | NA | FOS      |
| FUT11    | -3.36033   | 1.34288763 | 0 | NA | NA | FUT11    |
| FZD3     | -4.9729828 | 2.70223052 | 0 | NA | NA | FZD3     |
| GAS2     | -3.0464526 | 1.65391062 | 0 | NA | NA | GAS2     |
| GATC     | -4.9569503 | 1.5386214  | 0 | NA | NA | GATC     |
| GJC1     | -2.8228101 | 1.41752178 | 0 | NA | NA | GJC1     |
| GK3P     | -3.041541  | 1.40839884 | 0 | NA | NA | GK3P     |
| GLCE     | -3.297914  | 1.36107722 | 0 | NA | NA | GLCE     |
| GNG11    | -4.6550523 | 1.60596159 | 0 | NA | NA | GNG11    |
| GNG2     | 3.3049392  | 0.67064371 | 0 | NA | NA | GNG2     |
| GOLGA1   | -2.8694446 | 1.38471146 | 0 | NA | NA | GOLGA1   |
| GPR155   | -2.9358654 | 1.32266431 | 0 | NA | NA | GPR155   |
| GRIN2B   | -2.7893494 | 1.86405719 | 0 | NA | NA | GRIN2B   |
| GSTT1    | 14.567224  | 0.29536778 | 0 | NA | NA | GSTT1    |
| GYPA     | -3.3398883 | 1.50730896 | 0 | NA | NA | GYPA     |
| HADHB    | -3.5500149 | 1.30255086 | 0 | NA | NA | HADHB    |
| HAS3     | -2.7170941 | 1.34573993 | 0 | NA | NA | HAS3     |
| HBB      | -6.0753265 | 3.07303904 | 0 | NA | NA | HBB      |
| HBG1     | -5.0919514 | 2.4485439  | 0 | NA | NA | HBG1     |
| HCG11    | -2.6850125 | 1.46858808 | 0 | NA | NA | HCG11    |
| HEMGN    | -3.7746287 | 2.04436448 | 0 | NA | NA | HEMGN    |
| HLA-DMA  | 4.852325   | 0.47355534 | 0 | NA | NA | HLA-DMA  |
| HMBOX1   | 9.4320641  | 0.24538978 | 0 | NA | NA | HMBOX1   |
| HNRNPA0  | -2.8345414 | 1.2364776  | 0 | NA | NA | HNRNPA0  |
| HSPA2    | -3.2032388 | 1.45747749 | 0 | NA | NA | HSPA2    |
| HTR2A    | -8.5978236 | 3.18105929 | 0 | NA | NA | HTR2A    |
| IMMP1L   | -3.1167623 | 1.36790945 | 0 | NA | NA | IMMP1L   |
| ITGB3BP  | 3.7077098  | 0.66980147 | 0 | NA | NA | ITGB3BP  |

|              |            |            |   |    |    |              |
|--------------|------------|------------|---|----|----|--------------|
| ITPRIP       | -4.8085233 | 1.38297881 | 0 | NA | NA | ITPRIP       |
| KGFLP2       | -10.258703 | 2.72238842 | 0 | NA | NA | KGFLP2       |
| KIF3A        | -3.0737407 | 1.52727468 | 0 | NA | NA | KIF3A        |
| KLHDC8A      | 4.5112655  | 0.68928407 | 0 | NA | NA | KLHDC8A      |
| KPNB1        | -2.7311651 | 1.28255063 | 0 | NA | NA | KPNB1        |
| LCLAT1       | -4.0539244 | 1.40814788 | 0 | NA | NA | LCLAT1       |
| LMO7         | -2.8636254 | 1.393642   | 0 | NA | NA | LMO7         |
| LOC100129387 | -3.3914122 | 1.61354421 | 0 | NA | NA | LOC100129387 |
| LOC144486    | -2.7714156 | 1.27120705 | 0 | NA | NA | LOC144486    |
| LOC221710    | -2.9769436 | 1.70109375 | 0 | NA | NA | LOC221710    |
| LOC728554    | 3.1656053  | 0.78126995 | 0 | NA | NA | LOC728554    |
| LRCH1        | -2.9817491 | 1.48754686 | 0 | NA | NA | LRCH1        |
| LRRC37A4     | -3.3698976 | 1.68280214 | 0 | NA | NA | LRRC37A4     |
| LSM11        | -3.2322088 | 1.71262628 | 0 | NA | NA | LSM11        |
| LSM2         | -3.2913556 | 1.47098338 | 0 | NA | NA | LSM2         |
| LTF          | 2.9664019  | 0.72724447 | 0 | NA | NA | LTF          |
| LUM          | -3.2260897 | 1.95091755 | 0 | NA | NA | LUM          |
| MAMDC2       | -3.215659  | 1.43587342 | 0 | NA | NA | MAMDC2       |
| MDM4         | 3.0196712  | 0.78043155 | 0 | NA | NA | MDM4         |
| MED6         | -3.3017157 | 1.47041287 | 0 | NA | NA | MED6         |
| METT10D      | -2.7754442 | 1.3206454  | 0 | NA | NA | METT10D      |
| METTL10      | 3.7397373  | 0.69287372 | 0 | NA | NA | METTL10      |
| MFN1         | -4.2921499 | 1.39514778 | 0 | NA | NA | MFN1         |
| MLH3         | -3.3077975 | 1.27531588 | 0 | NA | NA | MLH3         |
| MRPS10       | -2.8214155 | 1.36885454 | 0 | NA | NA | MRPS10       |
| MRPS16       | -3.3590271 | 1.35298982 | 0 | NA | NA | MRPS16       |
| MYOCD        | -3.082473  | 1.36241313 | 0 | NA | NA | MYOCD        |
| NAV2         | -4.3314651 | 1.32226567 | 0 | NA | NA | NAV2         |
| NHSL1        | -3.5147792 | 1.30160174 | 0 | NA | NA | NHSL1        |
| NID2         | -3.5619483 | 1.75737721 | 0 | NA | NA | NID2         |
| NOV          | -2.847625  | 1.70505348 | 0 | NA | NA | NOV          |
| OCLN         | -3.4971851 | 1.51101582 | 0 | NA | NA | OCLN         |
| ODF1         | 4.6347296  | 0.55370102 | 0 | NA | NA | ODF1         |
| PCDHA10      | -2.865924  | 1.36392247 | 0 | NA | NA | PCDHA10      |
| PCSK5        | -3.0316199 | 1.39730482 | 0 | NA | NA | PCSK5        |
| PDGFC        | -4.4359191 | 1.58063729 | 0 | NA | NA | PDGFC        |
| PDGFRL       | -3.5086878 | 2.13452466 | 0 | NA | NA | PDGFRL       |
| PEX7         | -2.8320448 | 1.4155305  | 0 | NA | NA | PEX7         |
| PFDN5        | -4.0513292 | 1.36869283 | 0 | NA | NA | PFDN5        |
| PGCP         | -2.6868551 | 1.3440617  | 0 | NA | NA | PGCP         |
| POLR1A       | -3.0997891 | 1.34305056 | 0 | NA | NA | POLR1A       |
| POLR3E       | -3.0437648 | 1.34474236 | 0 | NA | NA | POLR3E       |
| POMZP3       | 10.36362   | 0.3317839  | 0 | NA | NA | POMZP3       |
| PPIG         | -3.1038205 | 1.48329993 | 0 | NA | NA | PPIG         |
| PROCR        | -3.6552633 | 1.42352553 | 0 | NA | NA | PROCR        |
| PRSS35       | -2.7653919 | 1.76424926 | 0 | NA | NA | PRSS35       |
| PSMB5        | -3.5088104 | 1.32463521 | 0 | NA | NA | PSMB5        |
| PTN          | -3.5390284 | 1.42543178 | 0 | NA | NA | PTN          |
| PTPRS        | -3.3876319 | 1.37662535 | 0 | NA | NA | PTPRS        |
| RCL1         | -3.8249932 | 1.39883248 | 0 | NA | NA | RCL1         |
| RCSD1        | -2.889604  | 1.52154846 | 0 | NA | NA | RCSD1        |
| RHOBTB2      | 3.0460716  | 0.75270106 | 0 | NA | NA | RHOBTB2      |
| RPL14        | -3.225496  | 1.3377925  | 0 | NA | NA | RPL14        |
| RPL27A       | -4.8315189 | 1.57672313 | 0 | NA | NA | RPL27A       |
| RPL38        | -3.7755266 | 1.3614783  | 0 | NA | NA | RPL38        |
| RPS23        | 5.6691597  | 0.65934831 | 0 | NA | NA | RPS23        |
| RPS4Y1       | 34.031146  | 0.01044102 | 0 | NA | NA | RPS4Y1       |

|           |            |            |            |    |    |           |
|-----------|------------|------------|------------|----|----|-----------|
| RWDD2A    | -2.843736  | 1.3185053  | 0          | NA | NA | RWDD2A    |
| SAR1A     | -11.355276 | 3.05639008 | 0          | NA | NA | SAR1A     |
| SDC3      | 3.9075778  | 0.68806994 | 0          | NA | NA | SDC3      |
| SERINC3   | -3.5661646 | 1.45310724 | 0          | NA | NA | SERINC3   |
| SERPINH1  | -3.5150056 | 1.42815054 | 0          | NA | NA | SERPINH1  |
| SETD6     | -3.1832995 | 1.57052209 | 0          | NA | NA | SETD6     |
| SLC20A2   | -2.8595998 | 1.4429525  | 0          | NA | NA | SLC20A2   |
| SLC41A2   | -3.4222912 | 1.39333258 | 0          | NA | NA | SLC41A2   |
| SNAP29    | -6.3300364 | 1.64923889 | 0          | NA | NA | SNAP29    |
| SPARC     | -3.0910308 | 1.34124545 | 0          | NA | NA | SPARC     |
| SPATA5    | -3.2914178 | 1.4958473  | 0          | NA | NA | SPATA5    |
| TBX15     | -3.2246332 | 1.53301564 | 0          | NA | NA | TBX15     |
| TERF1     | -3.228146  | 1.340048   | 0          | NA | NA | TERF1     |
| TMEM100   | -3.0007249 | 1.60591256 | 0          | NA | NA | TMEM100   |
| TMEM106C  | -2.9400017 | 1.50954861 | 0          | NA | NA | TMEM106C  |
| TMEM159   | -5.3443917 | 2.63754195 | 0          | NA | NA | TMEM159   |
| TMEM169   | -2.7655447 | 1.25706554 | 0          | NA | NA | TMEM169   |
| TMEM178   | -2.6904621 | 1.39217609 | 0          | NA | NA | TMEM178   |
| TMEM33    | -2.6658069 | 1.35762943 | 0          | NA | NA | TMEM33    |
| TNNI3K    | 4.7634285  | 0.57583172 | 0          | NA | NA | TNNI3K    |
| TTC32     | -6.837454  | 1.87150878 | 0          | NA | NA | TTC32     |
| TWSG1     | -2.8596631 | 1.33741803 | 0          | NA | NA | TWSG1     |
| TXN2      | -3.1741458 | 1.30516754 | 0          | NA | NA | TXN2      |
| UBE2H     | -2.9120245 | 1.29370931 | 0          | NA | NA | UBE2H     |
| ULBP2     | 3.235594   | 0.65035909 | 0          | NA | NA | ULBP2     |
| UPF3A     | -2.8879641 | 1.4299963  | 0          | NA | NA | UPF3A     |
| USP7      | -3.4224056 | 1.48698682 | 0          | NA | NA | USP7      |
| USP9Y     | 24.930165  | 0.03392756 | 0          | NA | NA | USP9Y     |
| VGLL4     | 3.9162699  | 0.49989022 | 0          | NA | NA | VGLL4     |
| ZFPM2     | -4.5503508 | 1.52778901 | 0          | NA | NA | ZFPM2     |
| ZNF281    | -3.4402922 | 1.32854507 | 0          | NA | NA | ZNF281    |
| ZNF33B    | 3.2726387  | 0.53745074 | 0          | NA | NA | ZNF33B    |
| ZNF410    | -2.9582169 | 1.30315211 | 0          | NA | NA | ZNF410    |
| ZNF673    | -2.8295142 | 1.35068033 | 0          | NA | NA | ZNF673    |
| ZNF678    | -7.0487526 | 3.15095782 | 0          | NA | NA | ZNF678    |
| ZNHIT6    | -2.8517864 | 1.32338501 | 0          | NA | NA | ZNHIT6    |
| AACS      | 2.7772252  | 0.81928872 | 0.15408684 | NA | NA | AACS      |
| AASDH     | -2.2837131 | 1.33839499 | 0.15408684 | NA | NA | AASDH     |
| AASS      | -2.3766554 | 1.24422141 | 0.15408684 | NA | NA | AASS      |
| ADAMTS5   | -2.5578755 | 1.32124927 | 0.15408684 | NA | NA | ADAMTS5   |
| ADORA2B   | -2.6464446 | 1.52409042 | 0.15408684 | NA | NA | ADORA2B   |
| AKAP5     | -2.4516203 | 1.43557392 | 0.15408684 | NA | NA | AKAP5     |
| ALKBH3    | -2.4735768 | 1.26430568 | 0.15408684 | NA | NA | ALKBH3    |
| ANGPT2    | -2.3641777 | 1.44208847 | 0.15408684 | NA | NA | ANGPT2    |
| ANKRD13A  | -2.609523  | 1.27601125 | 0.15408684 | NA | NA | ANKRD13A  |
| ARFGEF2   | -2.3904299 | 1.20561488 | 0.15408684 | NA | NA | ARFGEF2   |
| BPNT1     | -2.6408925 | 1.2100756  | 0.15408684 | NA | NA | BPNT1     |
| BUB3      | -2.4370156 | 1.20337506 | 0.15408684 | NA | NA | BUB3      |
| C10orf78  | -2.3176742 | 1.3305325  | 0.15408684 | NA | NA | C10orf78  |
| C14orf118 | -2.3531121 | 1.33016407 | 0.15408684 | NA | NA | C14orf118 |
| C21orf119 | 2.844505   | 0.67810524 | 0.15408684 | NA | NA | C21orf119 |
| C6orf52   | 2.7647041  | 0.73088546 | 0.15408684 | NA | NA | C6orf52   |
| CASC3     | -2.6647051 | 1.30076511 | 0.15408684 | NA | NA | CASC3     |
| CAST      | -2.4073902 | 1.23782379 | 0.15408684 | NA | NA | CAST      |
| CBX5      | -2.3490675 | 1.38954567 | 0.15408684 | NA | NA | CBX5      |
| CCNT1     | -2.4365363 | 1.58989758 | 0.15408684 | NA | NA | CCNT1     |
| CD302     | -2.5345817 | 1.43298482 | 0.15408684 | NA | NA | CD302     |
| CLSTN2    | -2.4636842 | 1.6788568  | 0.15408684 | NA | NA | CLSTN2    |

|           |            |            |            |    |    |           |
|-----------|------------|------------|------------|----|----|-----------|
| CNIH4     | -2.4647397 | 1.24346588 | 0.15408684 | NA | NA | CNIH4     |
| COL11A1   | -2.4263028 | 1.58502373 | 0.15408684 | NA | NA | COL11A1   |
| COL1A2    | -2.5247003 | 1.53757227 | 0.15408684 | NA | NA | COL1A2    |
| COL21A1   | -2.2715263 | 1.39844564 | 0.15408684 | NA | NA | COL21A1   |
| CPEB3     | -2.3418384 | 1.29947995 | 0.15408684 | NA | NA | CPEB3     |
| CRB1      | 2.7218365  | 0.77834041 | 0.15408684 | NA | NA | CRB1      |
| CSRNP3    | -2.6324874 | 1.77680543 | 0.15408684 | NA | NA | CSRNP3    |
| CTSL1     | -2.5466408 | 1.46599936 | 0.15408684 | NA | NA | CTSL1     |
| CYP1B1    | -2.5728104 | 1.59423958 | 0.15408684 | NA | NA | CYP1B1    |
| DAPK1     | 2.8189297  | 0.76157288 | 0.15408684 | NA | NA | DAPK1     |
| DGAT2     | 2.9155871  | 0.76247906 | 0.15408684 | NA | NA | DGAT2     |
| DGKA      | 2.6749752  | 0.76261627 | 0.15408684 | NA | NA | DGKA      |
| DHRS11    | -2.3061322 | 1.45353867 | 0.15408684 | NA | NA | DHRS11    |
| EFEMP1    | -2.2601246 | 1.512079   | 0.15408684 | NA | NA | EFEMP1    |
| ENDOD1    | -2.6652223 | 1.23841843 | 0.15408684 | NA | NA | ENDOD1    |
| ENTPD4    | -2.2639859 | 1.26243617 | 0.15408684 | NA | NA | ENTPD4    |
| EPC1      | -2.5084281 | 1.27380607 | 0.15408684 | NA | NA | EPC1      |
| ERCC8     | -2.3758432 | 1.20989691 | 0.15408684 | NA | NA | ERCC8     |
| EXOSC2    | -2.507613  | 1.19153459 | 0.15408684 | NA | NA | EXOSC2    |
| FBXW10    | 2.5525607  | 0.7559772  | 0.15408684 | NA | NA | FBXW10    |
| GABRB1    | 2.6685844  | 0.59317539 | 0.15408684 | NA | NA | GABRB1    |
| GALNT1    | -2.5505422 | 1.2497617  | 0.15408684 | NA | NA | GALNT1    |
| GSK3B     | -2.3125855 | 1.8209692  | 0.15408684 | NA | NA | GSK3B     |
| HHAT      | -2.6642639 | 1.37203725 | 0.15408684 | NA | NA | HHAT      |
| HHLA3     | 2.5531852  | 0.84325886 | 0.15408684 | NA | NA | HHLA3     |
| ITIH2     | -2.5172604 | 1.57287272 | 0.15408684 | NA | NA | ITIH2     |
| ITPRIPL2  | -2.2714985 | 1.18882915 | 0.15408684 | NA | NA | ITPRIPL2  |
| KATNA1    | -2.4099145 | 1.20178113 | 0.15408684 | NA | NA | KATNA1    |
| KCNG2     | -2.3943031 | 1.31400163 | 0.15408684 | NA | NA | KCNG2     |
| KIAA1033  | -2.5258399 | 1.4238757  | 0.15408684 | NA | NA | KIAA1033  |
| KIF21A    | -2.5343021 | 1.31543011 | 0.15408684 | NA | NA | KIF21A    |
| KLHL5     | -2.5304512 | 1.28779043 | 0.15408684 | NA | NA | KLHL5     |
| KRT75     | 2.5310171  | 0.83537088 | 0.15408684 | NA | NA | KRT75     |
| LDHAL6A   | 2.7683764  | 0.7212885  | 0.15408684 | NA | NA | LDHAL6A   |
| LOC253039 | -2.2687965 | 1.31648364 | 0.15408684 | NA | NA | LOC253039 |
| LOC344595 | -2.3850471 | 1.28620698 | 0.15408684 | NA | NA | LOC344595 |
| LYVE1     | -2.2907557 | 1.9875599  | 0.15408684 | NA | NA | LYVE1     |
| MALAT1    | -2.6059227 | 1.84262573 | 0.15408684 | NA | NA | MALAT1    |
| MAML3     | -2.2695581 | 1.18278914 | 0.15408684 | NA | NA | MAML3     |
| MAN1A1    | -2.3485979 | 1.47403349 | 0.15408684 | NA | NA | MAN1A1    |
| MARS2     | -2.5238092 | 1.38801805 | 0.15408684 | NA | NA | MARS2     |
| MED1      | -2.6381891 | 1.36884522 | 0.15408684 | NA | NA | MED1      |
| MMGT1     | -2.3779571 | 1.23820151 | 0.15408684 | NA | NA | MMGT1     |
| MRC2      | -2.6443084 | 1.27734229 | 0.15408684 | NA | NA | MRC2      |
| NCAPG     | -2.3366229 | 1.38654065 | 0.15408684 | NA | NA | NCAPG     |
| NEK10     | -2.2733071 | 1.3437932  | 0.15408684 | NA | NA | NEK10     |
| NEK11     | 2.6425471  | 0.83268837 | 0.15408684 | NA | NA | NEK11     |
| OLFML3    | -2.5775999 | 1.68013647 | 0.15408684 | NA | NA | OLFML3    |
| PBLD      | -2.3296979 | 1.38976503 | 0.15408684 | NA | NA | PBLD      |
| PEX3      | -2.3367843 | 1.24747703 | 0.15408684 | NA | NA | PEX3      |
| PHAX      | -2.6002356 | 1.26474595 | 0.15408684 | NA | NA | PHAX      |
| PIGF      | -2.5599996 | 1.22772039 | 0.15408684 | NA | NA | PIGF      |
| PITRM1    | 2.7774431  | 0.78930237 | 0.15408684 | NA | NA | PITRM1    |
| PNOC      | 2.5737188  | 0.75599796 | 0.15408684 | NA | NA | PNOC      |
| PNPLA8    | -2.3946008 | 1.24409588 | 0.15408684 | NA | NA | PNPLA8    |
| PPIB      | -2.3549659 | 1.28657741 | 0.15408684 | NA | NA | PPIB      |
| PRMT8     | -2.3041096 | 1.2286679  | 0.15408684 | NA | NA | PRMT8     |
| PRPF39    | -2.3193488 | 1.47045554 | 0.15408684 | NA | NA | PRPF39    |

|           |            |            |            |    |    |           |
|-----------|------------|------------|------------|----|----|-----------|
| PTCD3     | -2.3290937 | 1.20928246 | 0.15408684 | NA | NA | PTCD3     |
| RASA2     | -2.3064891 | 1.37965524 | 0.15408684 | NA | NA | RASA2     |
| RBMS3     | -2.5382434 | 1.17434759 | 0.15408684 | NA | NA | RBMS3     |
| RPGRIP1L  | -2.2612711 | 1.2759607  | 0.15408684 | NA | NA | RPGRIP1L  |
| RPP25     | 2.9209582  | 0.75889774 | 0.15408684 | NA | NA | RPP25     |
| SCARNA2   | 2.7205174  | 0.69920881 | 0.15408684 | NA | NA | SCARNA2   |
| SEC31A    | -2.4401949 | 1.27613832 | 0.15408684 | NA | NA | SEC31A    |
| SENP8     | -2.3818281 | 1.17602863 | 0.15408684 | NA | NA | SENP8     |
| SFRS12IP1 | -2.3118187 | 1.28184605 | 0.15408684 | NA | NA | SFRS12IP1 |
| SIAH3     | -2.5901526 | 1.8345651  | 0.15408684 | NA | NA | SIAH3     |
| SLC35B3   | -2.2959573 | 1.31271787 | 0.15408684 | NA | NA | SLC35B3   |
| SMURF2    | -2.263931  | 1.37802813 | 0.15408684 | NA | NA | SMURF2    |
| SOAT2     | 2.5770608  | 0.73759794 | 0.15408684 | NA | NA | SOAT2     |
| SRL       | -2.5935564 | 1.28325817 | 0.15408684 | NA | NA | SRL       |
| TAOK1     | -2.4294969 | 1.56100579 | 0.15408684 | NA | NA | TAOK1     |
| TCL1A     | 2.7836999  | 0.79808427 | 0.15408684 | NA | NA | TCL1A     |
| TRAPPC5   | -2.4614767 | 1.30937375 | 0.15408684 | NA | NA | TRAPPC5   |
| TRIM69    | -2.3625574 | 1.46343493 | 0.15408684 | NA | NA | TRIM69    |
| TUBB6     | -2.3299468 | 1.45598407 | 0.15408684 | NA | NA | TUBB6     |
| UHRF1     | -2.5674501 | 1.3798915  | 0.15408684 | NA | NA | UHRF1     |
| VDAC3     | -2.4883873 | 1.21200174 | 0.15408684 | NA | NA | VDAC3     |
| VPS29     | -2.4892411 | 1.22026069 | 0.15408684 | NA | NA | VPS29     |
| WDFY1     | -2.3148448 | 1.31487986 | 0.15408684 | NA | NA | WDFY1     |
| ZCCHC6    | -2.4770813 | 1.23305412 | 0.15408684 | NA | NA | ZCCHC6    |
| ZEB1      | -2.4675301 | 1.41869147 | 0.15408684 | NA | NA | ZEB1      |
| ZIC2      | -2.5628214 | 1.55072803 | 0.15408684 | NA | NA | ZIC2      |
| ZNF2      | -2.3970363 | 1.41933831 | 0.15408684 | NA | NA | ZNF2      |
| ZNF568    | -2.5273151 | 1.28010059 | 0.15408684 | NA | NA | ZNF568    |
| ZNF646    | -2.3111948 | 1.33040038 | 0.15408684 | NA | NA | ZNF646    |
| ZNF827    | -2.4277283 | 1.4249109  | 0.15408684 | NA | NA | ZNF827    |
| ABCC8     | 2.4328791  | 0.76046742 | 0.52040198 | NA | NA | ABCC8     |
| ADK       | -2.1302733 | 1.31924955 | 0.52040198 | NA | NA | ADK       |
| AHI1      | -1.9220662 | 1.18209537 | 0.52040198 | NA | NA | AHI1      |
| ANKRD42   | 2.2749257  | 0.82264758 | 0.52040198 | NA | NA | ANKRD42   |
| ANP32A    | -2.0033225 | 1.22966807 | 0.52040198 | NA | NA | ANP32A    |
| ANXA2     | -1.9997924 | 1.45329543 | 0.52040198 | NA | NA | ANXA2     |
| APOD      | 2.2826264  | 0.73716617 | 0.52040198 | NA | NA | APOD      |
| ARFIP1    | -2.1744556 | 1.30306661 | 0.52040198 | NA | NA | ARFIP1    |
| ARID2     | -2.1601992 | 1.33696186 | 0.52040198 | NA | NA | ARID2     |
| ATPAF2    | -2.0593733 | 1.23084647 | 0.52040198 | NA | NA | ATPAF2    |
| BAG3      | -1.9384694 | 1.31468397 | 0.52040198 | NA | NA | BAG3      |
| BCAS1     | -2.084448  | 1.20803661 | 0.52040198 | NA | NA | BCAS1     |
| BFSP2     | 2.1901177  | 0.82295316 | 0.52040198 | NA | NA | BFSP2     |
| BMP2K     | -1.9532441 | 1.16821622 | 0.52040198 | NA | NA | BMP2K     |
| BMP8A     | 2.1058632  | 0.73990316 | 0.52040198 | NA | NA | BMP8A     |
| BOK       | 2.3721644  | 0.76793487 | 0.52040198 | NA | NA | BOK       |
| BRAP      | -2.1352878 | 1.2534199  | 0.52040198 | NA | NA | BRAP      |
| C11orf57  | -2.0509347 | 1.18894566 | 0.52040198 | NA | NA | C11orf57  |
| C15orf61  | -1.9751662 | 1.23347746 | 0.52040198 | NA | NA | C15orf61  |
| C17orf86  | -2.0339511 | 1.26658073 | 0.52040198 | NA | NA | C17orf86  |
| C1orf27   | -1.974642  | 1.30984575 | 0.52040198 | NA | NA | C1orf27   |
| C21orf49  | 2.4976927  | 0.79183242 | 0.52040198 | NA | NA | C21orf49  |
| C2orf42   | -1.8927023 | 1.20108286 | 0.52040198 | NA | NA | C2orf42   |
| C3orf57   | -1.8893237 | 1.19816256 | 0.52040198 | NA | NA | C3orf57   |
| C7orf51   | -2.1071945 | 1.33640561 | 0.52040198 | NA | NA | C7orf51   |
| CACNG2    | 2.4539067  | 0.79018397 | 0.52040198 | NA | NA | CACNG2    |
| CAMK2N1   | -2.068048  | 1.26749433 | 0.52040198 | NA | NA | CAMK2N1   |
| CAPN8     | 2.062243   | 0.73588244 | 0.52040198 | NA | NA | CAPN8     |

|         |            |            |            |    |    |         |
|---------|------------|------------|------------|----|----|---------|
| CC2D2B  | 2.3528731  | 0.65284613 | 0.52040198 | NA | NA | CC2D2B  |
| CCDC125 | -2.1515828 | 1.23519787 | 0.52040198 | NA | NA | CCDC125 |
| CCDC140 | 2.1053809  | 0.80331706 | 0.52040198 | NA | NA | CCDC140 |
| CCDC28A | -2.1309696 | 1.26417516 | 0.52040198 | NA | NA | CCDC28A |
| CECR1   | 2.2627415  | 0.76025114 | 0.52040198 | NA | NA | CECR1   |
| CEP110  | -2.1125622 | 1.19484619 | 0.52040198 | NA | NA | CEP110  |
| CHEK2   | 2.114179   | 0.78587628 | 0.52040198 | NA | NA | CHEK2   |
| CLDN16  | 2.3310751  | 0.79347685 | 0.52040198 | NA | NA | CLDN16  |
| COL9A2  | 2.1659016  | 0.70015242 | 0.52040198 | NA | NA | COL9A2  |
| COX15   | -1.9051802 | 1.2085638  | 0.52040198 | NA | NA | COX15   |
| CPXM2   | 2.1325825  | 0.86026774 | 0.52040198 | NA | NA | CPXM2   |
| CST7    | 2.3033608  | 0.78005281 | 0.52040198 | NA | NA | CST7    |
| CTSC    | -2.1849962 | 1.37608816 | 0.52040198 | NA | NA | CTSC    |
| CTTNBP2 | -2.1819356 | 1.25458024 | 0.52040198 | NA | NA | CTTNBP2 |
| CXorf38 | -2.0975988 | 1.39567315 | 0.52040198 | NA | NA | CXorf38 |
| CXorf59 | 2.0504571  | 0.78277683 | 0.52040198 | NA | NA | CXorf59 |
| DCST1   | 2.1424342  | 0.71034187 | 0.52040198 | NA | NA | DCST1   |
| DEGS1   | -2.072779  | 1.1858773  | 0.52040198 | NA | NA | DEGS1   |
| DHTKD1  | -2.0802506 | 1.22301036 | 0.52040198 | NA | NA | DHTKD1  |
| DNAH7   | 2.41911    | 0.70773173 | 0.52040198 | NA | NA | DNAH7   |
| DNAJC5G | 2.0911647  | 0.71262761 | 0.52040198 | NA | NA | DNAJC5G |
| EFHB    | -1.9809965 | 1.37724656 | 0.52040198 | NA | NA | EFHB    |
| EIF2C3  | -2.0435392 | 1.34298354 | 0.52040198 | NA | NA | EIF2C3  |
| EIF3G   | -2.2129915 | 1.18242727 | 0.52040198 | NA | NA | EIF3G   |
| EIF5B   | -2.0811152 | 1.23309634 | 0.52040198 | NA | NA | EIF5B   |
| EMILIN3 | 2.2222533  | 0.73846615 | 0.52040198 | NA | NA | EMILIN3 |
| ERAP2   | -2.1155597 | 1.16759146 | 0.52040198 | NA | NA | ERAP2   |
| ERP44   | -2.024124  | 1.18241014 | 0.52040198 | NA | NA | ERP44   |
| FAM122A | -1.9726457 | 1.17223446 | 0.52040198 | NA | NA | FAM122A |
| FAM131C | 2.1503249  | 0.82193538 | 0.52040198 | NA | NA | FAM131C |
| FAM150B | 2.0544744  | 0.70944555 | 0.52040198 | NA | NA | FAM150B |
| FAM186B | 2.1947687  | 0.78534665 | 0.52040198 | NA | NA | FAM186B |
| FAM35A  | -2.1911292 | 1.24569496 | 0.52040198 | NA | NA | FAM35A  |
| FARSB   | -2.0363338 | 1.38382939 | 0.52040198 | NA | NA | FARSB   |
| FBN1    | -2.2223297 | 1.35000795 | 0.52040198 | NA | NA | FBN1    |
| FER     | -2.0464847 | 1.36356216 | 0.52040198 | NA | NA | FER     |
| FGL2    | -2.0653139 | 1.59204968 | 0.52040198 | NA | NA | FGL2    |
| GABRB2  | 2.371876   | 0.68809537 | 0.52040198 | NA | NA | GABRB2  |
| GAR1    | -2.1861567 | 1.23255098 | 0.52040198 | NA | NA | GAR1    |
| GATAD1  | -2.0920612 | 1.22377274 | 0.52040198 | NA | NA | GATAD1  |
| GEMIN8  | -2.1429039 | 1.22834499 | 0.52040198 | NA | NA | GEMIN8  |
| GHRHR   | 2.0826463  | 0.74904975 | 0.52040198 | NA | NA | GHRHR   |
| GIMAP2  | -2.0266119 | 1.33596833 | 0.52040198 | NA | NA | GIMAP2  |
| GLT8D2  | -1.8940871 | 1.25220948 | 0.52040198 | NA | NA | GLT8D2  |
| GLTP    | -1.9432979 | 1.25181329 | 0.52040198 | NA | NA | GLTP    |
| GNAL    | -2.0080944 | 1.86789974 | 0.52040198 | NA | NA | GNAL    |
| GNG10   | -2.0686584 | 1.27356848 | 0.52040198 | NA | NA | GNG10   |
| GNPDA1  | -2.0278047 | 1.20704513 | 0.52040198 | NA | NA | GNPDA1  |
| GNPNAT1 | -2.125466  | 1.17206348 | 0.52040198 | NA | NA | GNPNAT1 |
| GPC1    | 2.1876605  | 0.78278178 | 0.52040198 | NA | NA | GPC1    |
| GPR83   | -1.9193755 | 1.41579111 | 0.52040198 | NA | NA | GPR83   |
| GPR89B  | -2.0351575 | 1.17692447 | 0.52040198 | NA | NA | GPR89B  |
| GRB7    | 2.1377094  | 0.7432128  | 0.52040198 | NA | NA | GRB7    |
| GSTO2   | 2.2568222  | 0.69059817 | 0.52040198 | NA | NA | GSTO2   |
| GTF2H1  | -1.8994516 | 1.16105061 | 0.52040198 | NA | NA | GTF2H1  |
| HBP1    | -1.9735302 | 1.26538923 | 0.52040198 | NA | NA | HBP1    |
| HEATR5A | -1.902767  | 1.34983554 | 0.52040198 | NA | NA | HEATR5A |
| HIBADH  | -1.9814384 | 1.21161046 | 0.52040198 | NA | NA | HIBADH  |



|           |            |            |            |    |    |           |
|-----------|------------|------------|------------|----|----|-----------|
| HINT3     | -1.9441384 | 1.60393052 | 0.52040198 | NA | NA | HINT3     |
| HMGCR     | 2.0532203  | 0.86415929 | 0.52040198 | NA | NA | HMGCR     |
| HSD11B2   | 2.2925167  | 0.72482175 | 0.52040198 | NA | NA | HSD11B2   |
| HTATIP2   | 2.0700273  | 0.79864545 | 0.52040198 | NA | NA | HTATIP2   |
| INTS9     | -2.0402097 | 1.16961044 | 0.52040198 | NA | NA | INTS9     |
| ISLR2     | -1.9758955 | 1.33074964 | 0.52040198 | NA | NA | ISLR2     |
| ISOC1     | 2.4713551  | 0.77933133 | 0.52040198 | NA | NA | ISOC1     |
| KCTD16    | 2.354395   | 0.60252427 | 0.52040198 | NA | NA | KCTD16    |
| KIAA0090  | -2.1808647 | 1.23180295 | 0.52040198 | NA | NA | KIAA0090  |
| KIAA1586  | -2.1571613 | 1.28117498 | 0.52040198 | NA | NA | KIAA1586  |
| KIF5A     | -2.0342757 | 1.35590469 | 0.52040198 | NA | NA | KIF5A     |
| KRT74     | 2.1239248  | 0.77422916 | 0.52040198 | NA | NA | KRT74     |
| KRT82     | 2.4586007  | 0.73755047 | 0.52040198 | NA | NA | KRT82     |
| KTELC1    | -2.1984993 | 1.29330049 | 0.52040198 | NA | NA | KTELC1    |
| LAPTM4B   | -1.9216933 | 1.34113928 | 0.52040198 | NA | NA | LAPTM4B   |
| LHB       | -2.0833171 | 1.28891523 | 0.52040198 | NA | NA | LHB       |
| LLPH      | -1.999817  | 1.1937156  | 0.52040198 | NA | NA | LLPH      |
| LMX1A     | 2.4550773  | 0.77172307 | 0.52040198 | NA | NA | LMX1A     |
| LOC144438 | -2.0132641 | 1.26333967 | 0.52040198 | NA | NA | LOC144438 |
| LOC153328 | 2.4023878  | 0.77768044 | 0.52040198 | NA | NA | LOC153328 |
| LOC283174 | -2.1237479 | 1.27073276 | 0.52040198 | NA | NA | LOC283174 |
| LOC340357 | 2.3057571  | 0.73874396 | 0.52040198 | NA | NA | LOC340357 |
| LOC374491 | -1.9806138 | 1.2798857  | 0.52040198 | NA | NA | LOC374491 |
| LRRC17    | -1.9927652 | 1.27770681 | 0.52040198 | NA | NA | LRRC17    |
| LRRC37A2  | 2.1760499  | 0.82621777 | 0.52040198 | NA | NA | LRRC37A2  |
| LRRC57    | -2.0589527 | 1.30361128 | 0.52040198 | NA | NA | LRRC57    |
| LSG1      | -1.8904563 | 1.20921704 | 0.52040198 | NA | NA | LSG1      |
| MAP3K12   | 2.1973903  | 0.81938356 | 0.52040198 | NA | NA | MAP3K12   |
| MAPK3     | 2.0914245  | 0.85292565 | 0.52040198 | NA | NA | MAPK3     |
| MAS1      | 2.0962005  | 0.72382428 | 0.52040198 | NA | NA | MAS1      |
| MB        | 2.27274    | 0.71881396 | 0.52040198 | NA | NA | MB        |
| MCC       | -2.1187613 | 1.29070636 | 0.52040198 | NA | NA | MCC       |
| MFSD6L    | 2.2174655  | 0.7702194  | 0.52040198 | NA | NA | MFSD6L    |
| MMP16     | -1.9949701 | 1.25948912 | 0.52040198 | NA | NA | MMP16     |
| MRC1      | -2.0059435 | 2.02300477 | 0.52040198 | NA | NA | MRC1      |
| MRPL2     | -1.902676  | 1.21328046 | 0.52040198 | NA | NA | MRPL2     |
| MSL2      | -1.9960172 | 1.29359364 | 0.52040198 | NA | NA | MSL2      |
| MTERF     | -2.1988882 | 1.20543362 | 0.52040198 | NA | NA | MTERF     |
| MYH10     | -1.9686168 | 1.30885144 | 0.52040198 | NA | NA | MYH10     |
| NCDN      | 2.4662698  | 0.81990466 | 0.52040198 | NA | NA | NCDN      |
| NDC80     | -2.0028732 | 1.29395268 | 0.52040198 | NA | NA | NDC80     |
| NDUFS5    | 2.2017389  | 0.83524493 | 0.52040198 | NA | NA | NDUFS5    |
| NLN       | -2.1851909 | 1.1969421  | 0.52040198 | NA | NA | NLN       |
| NOSTRIN   | -2.1178711 | 1.29669248 | 0.52040198 | NA | NA | NOSTRIN   |
| NSL1      | -2.0645267 | 1.2104069  | 0.52040198 | NA | NA | NSL1      |
| OMD       | -2.2479875 | 1.87282089 | 0.52040198 | NA | NA | OMD       |
| ORMDL2    | -1.9860724 | 1.19784337 | 0.52040198 | NA | NA | ORMDL2    |
| PAIP2B    | 2.1305932  | 0.79107342 | 0.52040198 | NA | NA | PAIP2B    |
| PAPSS2    | -2.2111151 | 1.2575037  | 0.52040198 | NA | NA | PAPSS2    |
| PCDH8     | 2.4071771  | 0.71515048 | 0.52040198 | NA | NA | PCDH8     |
| PCDHGA1   | 2.307887   | 0.79195605 | 0.52040198 | NA | NA | PCDHGA1   |
| PCGF6     | -1.885943  | 1.27052744 | 0.52040198 | NA | NA | PCGF6     |
| PCLO      | 2.1715754  | 0.80619704 | 0.52040198 | NA | NA | PCLO      |
| PCSK6     | 2.4986726  | 0.84049685 | 0.52040198 | NA | NA | PCSK6     |
| PDE1A     | -2.2262416 | 1.28671827 | 0.52040198 | NA | NA | PDE1A     |
| PEX26     | -2.1140121 | 1.21066874 | 0.52040198 | NA | NA | PEX26     |
| PGM3      | -2.0435103 | 1.26859256 | 0.52040198 | NA | NA | PGM3      |
| PLAG1     | -1.9965254 | 1.30066752 | 0.52040198 | NA | NA | PLAG1     |

|          |            |            |            |    |    |          |
|----------|------------|------------|------------|----|----|----------|
| PON1     | 2.0833775  | 0.77710618 | 0.52040198 | NA | NA | PON1     |
| POP5     | -2.0889906 | 1.233827   | 0.52040198 | NA | NA | POP5     |
| POU2F2   | -1.9716952 | 1.24277587 | 0.52040198 | NA | NA | POU2F2   |
| PPM1D    | -2.141691  | 1.23000435 | 0.52040198 | NA | NA | PPM1D    |
| PPPDE1   | -2.2219879 | 1.26451279 | 0.52040198 | NA | NA | PPPDE1   |
| PRIMA1   | 2.2221399  | 0.74154802 | 0.52040198 | NA | NA | PRIMA1   |
| PRRX1    | -2.2172145 | 1.3321327  | 0.52040198 | NA | NA | PRRX1    |
| PSAPL1   | 2.1745227  | 0.79341248 | 0.52040198 | NA | NA | PSAPL1   |
| PSD3     | 2.261628   | 0.7178862  | 0.52040198 | NA | NA | PSD3     |
| PSIP1    | -1.991087  | 1.24723292 | 0.52040198 | NA | NA | PSIP1    |
| QTRTD1   | -1.9218234 | 1.17645254 | 0.52040198 | NA | NA | QTRTD1   |
| R3HDM2   | -1.8986794 | 1.27911761 | 0.52040198 | NA | NA | R3HDM2   |
| RAI14    | -1.9661168 | 1.3050944  | 0.52040198 | NA | NA | RAI14    |
| RANBP3L  | -1.8840796 | 1.21065335 | 0.52040198 | NA | NA | RANBP3L  |
| RBKS     | -1.9427115 | 1.24363587 | 0.52040198 | NA | NA | RBKS     |
| RBM27    | -1.8993699 | 1.21577946 | 0.52040198 | NA | NA | RBM27    |
| RBMS1    | -2.1281534 | 1.34581448 | 0.52040198 | NA | NA | RBMS1    |
| RDX      | -2.0118485 | 1.22780659 | 0.52040198 | NA | NA | RDX      |
| REG3A    | 2.1035545  | 0.83289156 | 0.52040198 | NA | NA | REG3A    |
| RGS22    | 2.1723     | 0.76006672 | 0.52040198 | NA | NA | RGS22    |
| RNF115   | -2.2382884 | 1.31117258 | 0.52040198 | NA | NA | RNF115   |
| ROD1     | -2.0930953 | 1.32272881 | 0.52040198 | NA | NA | ROD1     |
| RPP14    | -2.1327202 | 1.32992645 | 0.52040198 | NA | NA | RPP14    |
| RPS4X    | -2.1992759 | 1.1435872  | 0.52040198 | NA | NA | RPS4X    |
| RSBN1    | -2.1458921 | 1.19759535 | 0.52040198 | NA | NA | RSBN1    |
| RSF1     | -2.0162309 | 1.31937541 | 0.52040198 | NA | NA | RSF1     |
| RYK      | -2.1729138 | 1.28586957 | 0.52040198 | NA | NA | RYK      |
| S100A11  | -2.1809246 | 1.37936479 | 0.52040198 | NA | NA | S100A11  |
| SAG      | 2.3658024  | 0.75387657 | 0.52040198 | NA | NA | SAG      |
| SAMD9    | -1.962769  | 1.22384576 | 0.52040198 | NA | NA | SAMD9    |
| SDCCAG1  | -2.0260314 | 1.17062402 | 0.52040198 | NA | NA | SDCCAG1  |
| SERPINB8 | 2.1704807  | 0.7920756  | 0.52040198 | NA | NA | SERPINB8 |
| SETD1A   | -2.0067014 | 1.23141286 | 0.52040198 | NA | NA | SETD1A   |
| SHFM1    | -2.0231735 | 1.21727741 | 0.52040198 | NA | NA | SHFM1    |
| SHROOM4  | -2.1155196 | 1.19954957 | 0.52040198 | NA | NA | SHROOM4  |
| SLA      | -2.0851739 | 1.25234599 | 0.52040198 | NA | NA | SLA      |
| SLC12A5  | 2.2462063  | 0.81191818 | 0.52040198 | NA | NA | SLC12A5  |
| SLC25A14 | -2.1189443 | 1.20191495 | 0.52040198 | NA | NA | SLC25A14 |
| SLC31A2  | -1.974387  | 1.32182763 | 0.52040198 | NA | NA | SLC31A2  |
| SLC39A10 | 2.2087944  | 0.83672299 | 0.52040198 | NA | NA | SLC39A10 |
| SLC4A7   | -2.1984199 | 1.31180157 | 0.52040198 | NA | NA | SLC4A7   |
| SNORA57  | 2.2363773  | 0.75239695 | 0.52040198 | NA | NA | SNORA57  |
| SNRNP27  | -2.0354463 | 1.18932417 | 0.52040198 | NA | NA | SNRNP27  |
| SOSTDC1  | 2.3612779  | 0.72786663 | 0.52040198 | NA | NA | SOSTDC1  |
| SPNS3    | 2.1222548  | 0.70307546 | 0.52040198 | NA | NA | SPNS3    |
| STAM     | 2.279432   | 0.84229943 | 0.52040198 | NA | NA | STAM     |
| STRN3    | -2.1987479 | 1.27517342 | 0.52040198 | NA | NA | STRN3    |
| TAF13    | -2.0862826 | 1.39718788 | 0.52040198 | NA | NA | TAF13    |
| TFAM     | -2.2124488 | 1.29583364 | 0.52040198 | NA | NA | TFAM     |
| TFPI2    | -1.9400506 | 1.14045646 | 0.52040198 | NA | NA | TFPI2    |
| TIMP3    | -2.0849439 | 1.2966405  | 0.52040198 | NA | NA | TIMP3    |
| TJP1     | -1.9522857 | 1.19967294 | 0.52040198 | NA | NA | TJP1     |
| TLR2     | 2.109616   | 0.7260496  | 0.52040198 | NA | NA | TLR2     |
| TLX3     | 2.0933695  | 0.74356216 | 0.52040198 | NA | NA | TLX3     |
| TMEM184C | -1.9276261 | 1.22844115 | 0.52040198 | NA | NA | TMEM184C |
| TMEM220  | -1.9798549 | 1.27831435 | 0.52040198 | NA | NA | TMEM220  |
| TMEM39A  | -2.0776092 | 1.22157921 | 0.52040198 | NA | NA | TMEM39A  |
| TNIK     | -1.9259299 | 1.24052773 | 0.52040198 | NA | NA | TNIK     |

|          |            |            |            |    |    |          |
|----------|------------|------------|------------|----|----|----------|
| TOE1     | -2.007117  | 1.23124864 | 0.52040198 | NA | NA | TOE1     |
| TOR1AIP1 | -1.9418099 | 1.27535724 | 0.52040198 | NA | NA | TOR1AIP1 |
| TRPM7    | -2.1178918 | 1.19694633 | 0.52040198 | NA | NA | TRPM7    |
| TSPAN3   | -1.9084854 | 1.12209829 | 0.52040198 | NA | NA | TSPAN3   |
| TTC21A   | 2.1685433  | 0.81430899 | 0.52040198 | NA | NA | TTC21A   |
| TWIST1   | -2.1784754 | 1.38715615 | 0.52040198 | NA | NA | TWIST1   |
| TWISTNB  | -1.9593813 | 1.23898705 | 0.52040198 | NA | NA | TWISTNB  |
| UBE2N    | -1.971055  | 1.15218407 | 0.52040198 | NA | NA | UBE2N    |
| UBQLN2   | 2.0551659  | 0.83870165 | 0.52040198 | NA | NA | UBQLN2   |
| UBXN7    | -2.1792546 | 1.33298596 | 0.52040198 | NA | NA | UBXN7    |
| UTP23    | -2.0043301 | 1.44435443 | 0.52040198 | NA | NA | UTP23    |
| WARS2    | -1.9882524 | 1.16512945 | 0.52040198 | NA | NA | WARS2    |
| WDR12    | -2.0742806 | 1.17417307 | 0.52040198 | NA | NA | WDR12    |
| WIT1     | 2.0830366  | 0.7403525  | 0.52040198 | NA | NA | WIT1     |
| YTHDF2   | -2.1610003 | 1.14729333 | 0.52040198 | NA | NA | YTHDF2   |
| ZBTB25   | 2.4548182  | 0.67193386 | 0.52040198 | NA | NA | ZBTB25   |
| ZBTB8OS  | -1.889675  | 1.37315545 | 0.52040198 | NA | NA | ZBTB8OS  |
| ZC3HAV1  | -2.1859277 | 1.27529601 | 0.52040198 | NA | NA | ZC3HAV1  |
| ZCCHC2   | -1.8957973 | 1.26380685 | 0.52040198 | NA | NA | ZCCHC2   |
| ZCCHC24  | -2.0265927 | 1.24020817 | 0.52040198 | NA | NA | ZCCHC24  |
| ZFP106   | -1.9961314 | 1.17420263 | 0.52040198 | NA | NA | ZFP106   |
| ZFP90    | -1.9415611 | 1.17520105 | 0.52040198 | NA | NA | ZFP90    |
| ZIC1     | -2.0479031 | 1.37387861 | 0.52040198 | NA | NA | ZIC1     |
| ZKSCAN1  | -1.9608204 | 1.19686149 | 0.52040198 | NA | NA | ZKSCAN1  |
| ZMYM5    | -1.9307096 | 1.27978372 | 0.52040198 | NA | NA | ZMYM5    |
| ZNF226   | -1.9817975 | 1.24942263 | 0.52040198 | NA | NA | ZNF226   |
| ZNF461   | -2.0113456 | 1.32811005 | 0.52040198 | NA | NA | ZNF461   |
| ZNF485   | -1.8866719 | 1.31103526 | 0.52040198 | NA | NA | ZNF485   |
| ZNF567   | -2.1117909 | 1.29733533 | 0.52040198 | NA | NA | ZNF567   |
| ZNF8     | -1.9349992 | 1.18664382 | 0.52040198 | NA | NA | ZNF8     |

## Supplementary table 3

### Genes Nearby a TFBS with a significant turnover

| <b>SYMBOL</b> | <b>TF</b>                                                                                                                                                                                         | <b>PFOvsPT.q</b> | <b>PFOvsPT.FC</b> | <b>17vs19.q</b>  | <b>17vs19.FC</b> |
|---------------|---------------------------------------------------------------------------------------------------------------------------------------------------------------------------------------------------|------------------|-------------------|------------------|------------------|
| "CA10"        | MA0089.1.NFE2L1::MafG MA0122.1.Nkx3-2 MA0068.1.Pax4 MA0033.1.FOXL1 MA0154.1.EBF1 MA0032.1.FOXC1 MA0027.1.En1                                                                                      | 0                | 5.712212733       | <b>37.305898</b> | 0.680951788      |
| "COL12A1"     | MA0033.1.FOXL1 MA0006.1.Arnt::Ahr                                                                                                                                                                 | 0                | 1.458176067       | <b>45.966351</b> | 1.074272474      |
| "FLJ41649"    | MA0009.1.T MA0037.1.GATA3                                                                                                                                                                         | 0                | 0.18001333        | <b>50.945784</b> | 1.127531418      |
| "MDGA1"       | MA0114.1.HNF4A                                                                                                                                                                                    | 0                | 1.470491648       | <b>24.919109</b> | 0.881719509      |
| "NFE2L3"      | MA0073.1.RREB1                                                                                                                                                                                    | 0                | 0.457712017       | <b>24.919109</b> | 0.742823848      |
| "OCA2"        | MA0037.1.GATA3 MA0056.1.MZF1_1-4 MA0073.1.RREB1 MA0079.2.SP1 MA0105.1.NFKB1 MA0057.1.MZF1_5-13 MA0068.1.Pax4                                                                                      | 0                | 0.339901245       | <b>53.049636</b> | 1.045841429      |
| "PDE4DIP"     | MA0156.1.FEV MA0055.1.Myf                                                                                                                                                                         | 0                | 0.692919758       | <b>37.305898</b> | 0.91679345       |
| "PTPN13"      | MA0035.2.Gata1 MA0050.1.IRF1 MA0051.1.IRF2 MA0037.1.GATA3 MA0063.1.Nkx2-5 MA0067.1.Pax2 MA0055.1.Myf MA0018.2.CREB1 MA0111.1.Spz1 MA0117.1.Mafb MA0133.1.BRCA1 MA0100.1.Myb MA0089.1.NFE2L1::MafG | 0                | 0.527643875       | <b>24.919109</b> | 0.84712375       |
| "SORCS1"      | MA0046.1.HNF1A                                                                                                                                                                                    | 0                | 0.484518816       | <b>45.966351</b> | 1.142124228      |
| "WBSCR17"     | MA0146.1.Zfx                                                                                                                                                                                      | 0                | 1.542744782       | <b>53.049636</b> | 1.01216026       |
| "ELAVL2"      | MA0163.1.PLAG1                                                                                                                                                                                    | <b>0.1132952</b> | 1.499451152       | <b>14.05416</b>  | 1.244444473      |

|                 |                                                                                                             |                  |             |                  |             |
|-----------------|-------------------------------------------------------------------------------------------------------------|------------------|-------------|------------------|-------------|
| <b>"LPHN3"</b>  | MA0028.1.ELK1 MA0088.1.znf143 MA0090.1.TEAD1 MA0136.1.ELF5 MA0149.1.EWSR1-FLI1 MA0081.1.SPIB MA0079.2.SP1   | <b>0.1920624</b> | 1.287259152 | <b>50.945784</b> | 0.989684833 |
| <b>"NLGN1"</b>  | MA0115.1.NR1H2::RXRA                                                                                        | <b>0.1920624</b> | 0.70393173  | <b>45.966351</b> | 1.05921267  |
| <b>"PARP8"</b>  | MA0162.1.Egr1 MA0006.1.Arnt:: <b>Ahr</b>  MA0042.1.FOXI1                                                    | <b>0.1920624</b> | 1.453057443 | <b>37.305898</b> | 0.912318071 |
| <b>"RPH3A"</b>  | MA0042.1.FOXI1 MA0073.1.RREB1 MA0084.1.SRY                                                                  | <b>0.1920624</b> | 1.750384294 | <b>5.7461843</b> | 0.650129372 |
| <b>"XYLT1"</b>  | MA0151.1.ARID3A                                                                                             | <b>0.1920624</b> | 0.80021924  | <b>45.966351</b> | 0.972022235 |
| <b>"ZNF438"</b> | MA0073.1.RREB1 MA0006.1.Arnt:: <b>Ahr</b>  MA0042.1.FOXI1 MA0068.1.Pax4 MA0162.1.Egr1                       | <b>0.1920624</b> | 0.790438068 | <b>50.945784</b> | 1.025841266 |
| <b>"ZNF488"</b> | MA0061.1.NF-kappaB MA0068.1.Pax4 MA0073.1.RREB1 MA0107.1.RELA MA0133.1.BRCA1 MA0142.1.Pou5f1 MA0158.1.HOXA5 | <b>0.5692172</b> | 0.69467208  | <b>5.7461843</b> | 0.769449566 |

|             |                                                                                           |                  |             |                  |             |
|-------------|-------------------------------------------------------------------------------------------|------------------|-------------|------------------|-------------|
| "ANKRD18A"  | MA0002.2.RUNX1 MA0028.1.ELK1 MA0027.1.En1 MA0063.1.Nkx2-5 MA0014.1.Pax5 MA0017.1.NR2F1 MA | <b>0.8841996</b> | 0.700121216 | <b>14.05416</b>  | 0.80894258  |
| "EFNA5"     | MA0070.1.PBX1 MA0038.1.Gfi                                                                | <b>0.8841996</b> | 0.805562936 | <b>45.966351</b> | 1.057912259 |
| "LOC440570" | MA0019.1.Ddit3::Cebpa MA0122.1.Nkx3-2                                                     | <b>0.8841996</b> | 1.523432007 | <b>1.6684098</b> | 1.442728927 |
| "RSPO3"     | MA0091.1.TAL1::TCF3                                                                       | <b>0.8841996</b> | 1.282867266 | <b>14.05416</b>  | 1.174306977 |
| "FAM36A"    | MA0073.1.RREB1                                                                            | <b>2.3573161</b> | 0.852819971 | <b>53.049636</b> | 1.00508389  |
| "FAT3"      | MA0052.1.MEF2A                                                                            | <b>2.3573161</b> | 0.79278441  | <b>45.966351</b> | 1.056480815 |
| "NFIB"      | MA0162.1.Egr1                                                                             | <b>2.3573161</b> | 0.736933547 | <b>1.6684098</b> | 1.352237816 |
| "NIPBL"     | MA0092.1.Hand1::Tcfe2a                                                                    | <b>5.5878899</b> | 0.745246255 | <b>1.6684098</b> | 1.366650823 |
| "PDE4D"     | MA0061.1.NF-kappaB MA0113.1.NR3C1 MA0164.1.Nr2e3 MA0101.1.REL MA0107.1.RELA               | <b>5.5878899</b> | 1.211239512 | <b>45.966351</b> | 1.057117174 |
| "SYT3"      | MA0027.1.En1 MA0062.2.GABPA                                                               | <b>5.5878899</b> | 1.223613257 | <b>24.919109</b> | 0.919808153 |
| "ATP2B4"    | MA0137.2.STAT1                                                                            | <b>10.827679</b> | 0.858145422 | <b>53.049636</b> | 1.003120724 |

|           |                                                                                                                                                                                                     |                  |             |                  |             |
|-----------|-----------------------------------------------------------------------------------------------------------------------------------------------------------------------------------------------------|------------------|-------------|------------------|-------------|
| "NUBPL"   | MA0024.1.E2F1 MA0031.1.FOXD1 MA0122.1.Nkx3-2 MA0124.1.NKX3-1 MA0063.1.Nkx2-5 MA0103.1.ZEB1 MA0145.1.Tcfcp2l1                                                                                        | <b>10.827679</b> | 0.875619426 | <b>45.966351</b> | 0.973167718 |
| "SHANK2"  | MA0066.1.PPARG                                                                                                                                                                                      | <b>10.827679</b> | 0.868594144 | <b>24.919109</b> | 0.928273354 |
| "TAC1"    | MA0006.1.Arnt:: <b>Ahr</b>  MA0162.1.Egr1                                                                                                                                                           | <b>10.827679</b> | 1.395738793 | <b>24.919109</b> | 1.19542118  |
| "ZCCHC11" | MA0061.1.NF-kappaB MA0105.1.NFKB1                                                                                                                                                                   | <b>10.827679</b> | 0.805590514 | <b>5.7461843</b> | 1.231333928 |
| "ANXA2"   | MA0073.1.RREB1                                                                                                                                                                                      | <b>16.669199</b> | 1.285928472 | <b>0.520402</b>  | 1.453295433 |
| "IGSF9"   | MA0162.1.Egr1 MA0037.1.GATA3                                                                                                                                                                        | <b>16.669199</b> | 1.28268069  | <b>0.520402</b>  | 0.686088877 |
| "MSRA"    | MA0042.1.FOXI1 MA0162.1.Egr1 MA0006.1.Arnt:: <b>Ahr</b>  MA0037.1.GATA3                                                                                                                             | <b>16.669199</b> | 0.819260057 | <b>1.6684098</b> | 1.280609447 |
| "PTRF"    | MA0068.1.Pax4 MA0101.1.REL MA0119.1.TLX1::NFIC MA0161.1.NFIC                                                                                                                                        | <b>16.669199</b> | 1.136054582 | <b>24.919109</b> | 1.096944237 |
| "SALL3"   | MA0137.2.STAT1 MA0144.1.Stat3                                                                                                                                                                       | <b>16.669199</b> | 1.14900178  | <b>24.919109</b> | 0.928252714 |
| "SLIT3"   | MA0042.1.FOXI1 MA0006.1.Arnt:: <b>Ahr</b>  MA0079.2.SP1 MA0162.1.Egr1                                                                                                                               | <b>16.669199</b> | 1.14686011  | <b>45.966351</b> | 0.975503032 |
| "TRPS1"   | MA0070.1. <b>PBX1</b>                                                                                                                                                                               | <b>16.669199</b> | 0.882009935 | <b>53.049636</b> | 1.005130483 |
| "ADORA2B" | MA0058.1.MAX MA0036.1.GATA2 MA0056.1.MZF1_1-4                                                                                                                                                       | <b>24.934882</b> | 1.239787852 | <b>0.1540868</b> | 1.524090418 |
| "CCDC101" | MA0056.1.MZF1_1-4                                                                                                                                                                                   | <b>24.934882</b> | 1.133362534 | <b>24.919109</b> | 1.085245461 |
| "ISX"     | MA0070.1. <b>PBX1</b>                                                                                                                                                                               | <b>24.934882</b> | 1.173648551 | <b>45.966351</b> | 0.958390386 |
| "LYRM5"   | MA0006.1.Arnt:: <b>Ahr</b>  MA0042.1.FOXI1 MA0259.1.HIF1A::ARNT MA0073.1.RREB1 MA0162.1.Egr1                                                                                                        | <b>24.934882</b> | 0.886598396 | <b>45.966351</b> | 0.983837695 |
| "MON1B"   | MA0052.1.MEF2A                                                                                                                                                                                      | <b>24.934882</b> | 1.120449736 | <b>37.305898</b> | 0.948907644 |
| "MUC2"    | MA0033.1.FOXL1 MA0048.1.NHLH1 MA0002.2.RUNX1 MA0091.1.TAL1::TCF3 MA0109.1.Hlf MA0111.1.Spz1 MA0116.1.Zfp423 MA0130.1.ZNF354C MA0133.1.BRCA1 MA0154.1.EBF1 MA0163.1.PLAG1 MA0055.1.Myf MA0050.1.IRF1 | <b>24.934882</b> | 1.140321231 | <b>14.05416</b>  | 0.879418624 |

|             |                                                                                                                                                                                                                             |                  |             |                  |             |
|-------------|-----------------------------------------------------------------------------------------------------------------------------------------------------------------------------------------------------------------------------|------------------|-------------|------------------|-------------|
| "NRP1"      | MA0024.1.E2F1 MA0028.1.ELK1 MA0035.2.Gata1 MA0073.1.RREB1 MA0079.2.SP1 MA0080.2.SPI1 MA0037.1.GATA3 MA0098.1.ETS1 MA0136.1.ELF5 MA0149.1.EWSR1-FLI1 MA0081.1.SPIB MA0014.1.Pax5 MA0442.1.SOX10 MA0152.1.NFATC2 MA0156.1.FEV | <b>24.934882</b> | 1.169871902 | <b>5.7461843</b> | 0.833834891 |
| "ODZ2"      | MA0105.1.NFKB1                                                                                                                                                                                                              | <b>24.934882</b> | 0.865604228 | <b>50.945784</b> | 0.995839252 |
| "PLXNA4"    | MA0073.1.RREB1                                                                                                                                                                                                              | <b>24.934882</b> | 0.816235773 | <b>1.6684098</b> | 1.326671121 |
| "TBC1D2B"   | MA0029.1.Evi1                                                                                                                                                                                                               | <b>24.934882</b> | 1.098241784 | <b>37.305898</b> | 0.95475188  |
| "ATP8B3"    | MA0056.1.MZF1_1-4 MA0149.1.EWSR1-FLI1                                                                                                                                                                                       | <b>35.800528</b> | 1.110581209 | <b>24.919109</b> | 0.933824721 |
| "CDH6"      | MA0073.1.RREB1 MA0041.1.Foxd3 MA0068.1.Pax4                                                                                                                                                                                 | <b>35.800528</b> | 1.109747131 | <b>37.305898</b> | 1.055872685 |
| "COPS4"     | MA0061.1.NF-kappaB                                                                                                                                                                                                          | <b>35.800528</b> | 1.062116264 | <b>53.049636</b> | 1.003464593 |
| "DSCR3"     | MA0098.1.ETS1 MA0130.1.ZNF354C MA0095.1.YY1 MA0070.1. <b>PBX1</b>  MA0069.1.Pax6                                                                                                                                            | <b>35.800528</b> | 1.082491502 | <b>24.919109</b> | 1.077327951 |
| "HLA-DRB4"  | MA0061.1.NF-kappaB                                                                                                                                                                                                          | <b>35.800528</b> | 1.107078032 | <b>5.7461843</b> | 0.845651436 |
| "HTT"       | MA0072.1.RORA_2 MA0065.2.PPARG::RXRA MA0043.1. <b>HLF</b>  MA0152.1.NFATC2 MA0059.1.MYC::MAX MA0098.1.ETS1 MA0151.1.ARID3A                                                                                                  | <b>35.800528</b> | 0.892065091 | <b>24.919109</b> | 0.916263387 |
| "IGLV4-60"  | MA0039.2.Klf4                                                                                                                                                                                                               | <b>35.800528</b> | 0.895473292 | <b>24.919109</b> | 1.103378096 |
| "ITGB5"     | MA0041.1.Foxd3 MA0042.1.FOXI1 MA0146.1.Zfx                                                                                                                                                                                  | <b>35.800528</b> | 1.099186866 | <b>24.919109</b> | 0.948160345 |
| "LGR6"      | MA0068.1.Pax4                                                                                                                                                                                                               | <b>35.800528</b> | 1.093999929 | <b>14.05416</b>  | 1.108708334 |
| "LOC645166" | MA0002.2.RUNX1 MA0061.1.NF-kappaB MA0105.1.NFKB1 MA0107.1.RELA MA0081.1.SPIB MA0101.1.REL MA0162.1.Egr1                                                                                                                     | <b>35.800528</b> | 1.148773544 | <b>0</b>         | 0.704168146 |
| "MBP"       | MA0147.1.Myc                                                                                                                                                                                                                | <b>35.800528</b> | 1.090236767 | <b>50.945784</b> | 1.022693683 |
| "MYO10"     | MA0105.1.NFKB1                                                                                                                                                                                                              | <b>35.800528</b> | 1.107035439 | <b>24.919109</b> | 1.100168026 |



|            |                                                                                                                                                                                                                       |                  |             |                  |             |
|------------|-----------------------------------------------------------------------------------------------------------------------------------------------------------------------------------------------------------------------|------------------|-------------|------------------|-------------|
| "PUS7L"    | MA0046.1.HNF1A                                                                                                                                                                                                        | <b>35.800528</b> | 0.914512663 | <b>53.049636</b> | 1.005902807 |
| "RHCG"     | MA0083.1.SRF                                                                                                                                                                                                          | <b>35.800528</b> | 1.096496599 | <b>37.305898</b> | 1.054226013 |
| "TUSC5"    | MA0091.1.TAL1::TCF3                                                                                                                                                                                                   | <b>35.800528</b> | 1.197800122 | <b>45.966351</b> | 1.075037446 |
| "WSB1"     | MA0106.1.TP53                                                                                                                                                                                                         | <b>35.800528</b> | 0.840343285 | <b>0.1540868</b> | 1.389657773 |
| "ZNF100"   | MA0048.1.NHLH1 MA0055.1.Myf MA0058.1.MAX MA0079.2.SP1 MA0093.1.USF1 MA0057.1.MZF1_5-13 MA0113.1. <b>NR3C1</b>  MA0130.1.ZNF354C MA0147.1.Myc MA0100.1. <b>Myb</b>  MA0004.1.Arnt MA0039.2.Klf4 MA0160.1. <b>NR4A2</b> | <b>35.800528</b> | 1.094009682 | <b>37.305898</b> | 1.045941503 |
| "ATP6V1E1" | MA0025.1.NFIL3                                                                                                                                                                                                        | <b>49.792314</b> | 1.045345697 | <b>24.919109</b> | 1.080822353 |
| "C2orf37"  | MA0144.1.Stat3                                                                                                                                                                                                        | <b>49.792314</b> | 0.901416142 | <b>37.305898</b> | 1.077171322 |
| "C5orf42"  | MA0042.1.FOXI1 MA0073.1.RREB1 MA0006.1.Arnt:: <b>Ahr</b>  MA0162.1.Egr1                                                                                                                                               | <b>49.792314</b> | 1.065263289 | <b>45.966351</b> | 1.039777428 |
| "CHD1L"    | MA0061.1.NF-kappaB MA0067.1.Pax2 MA0093.1.USF1 MA0098.1.ETS1 MA0081.1.SPIB MA0122.1.Nkx3-2 MA0068.1.Pax4 MA0004.1.Arnt MA0019.1.Ddit3::Cebpa MA0101.1.REL                                                             | <b>49.792314</b> | 1.086234334 | <b>1.6684098</b> | 0.847156212 |

|           |                                                                                                                                                                                                                                                                                                                                                                                                                                                                                                                                                                                                                                                                                                                                                                                                   |                  |             |                  |             |
|-----------|---------------------------------------------------------------------------------------------------------------------------------------------------------------------------------------------------------------------------------------------------------------------------------------------------------------------------------------------------------------------------------------------------------------------------------------------------------------------------------------------------------------------------------------------------------------------------------------------------------------------------------------------------------------------------------------------------------------------------------------------------------------------------------------------------|------------------|-------------|------------------|-------------|
| "COL3A1"  | MA0032.1.FOXC1 MA0036.1.GATA2 MA0031.1.FOXD1 MA0048.1.NHLH1 MA0050.1.IRF1 MA0037.1.GATA3 MA0040.1.Foxq1 MA0056.1.MZF1_1-4 MA0014.1.Pax5 MA0027.1.En1 MA0028.1.ELK1 MA0077.1.SOX9 MA0078.1.Sox17 MA0079.2.SP1 MA0080.2.SPI1 MA0081.1.SPIB MA0084.1.SRY MA0088.1.znf143 MA0051.1.IRF2 MA0055.1.Myf MA0095.1.YY1 MA0098.1.ETS1 MA0099.2.AP1 MA0101.1.REL MA0102.2.CEBPA MA0109.1.Hltf MA0111.1.Spz1 MA0113.1.NR3C1 MA0114.1.HNF4A MA0117.1.Mafb MA0122.1.Nkx3-2 MA0089.1.NFE2L1::MafG MA0092.1.Hand1::Tcf2a MA0132.1.Pdx1 MA0136.1.ELF5 MA0140.1.Tal1::Gata1 MA0150.1.NFE2L2 MA0151.1.ARID3A MA0152.1.NFATC2 MA0153.1.HNF1B MA0156.1.FEV MA0157.1.FOXO3 MA0158.1.HOXA5 MA0161.1.NFIC MA0163.1.PLAG1 MA0442.1.SOX10 MA0124.1.NKX3-1 MA0130.1.ZNF354C MA0057.1.MZF1_5-13 MA0063.1.Nkx2-5 MA0068.1.Pax4 | <b>49.792314</b> | 1.139581552 | <b>0</b>         | 1.539116742 |
| "DCUN1D4" | MA0099.2.AP1 MA0135.1.Lhx3 MA0028.1.ELK1 MA0076.1.ELK4                                                                                                                                                                                                                                                                                                                                                                                                                                                                                                                                                                                                                                                                                                                                            | <b>49.792314</b> | 1.06131661  | <b>5.7461843</b> | 1.186087636 |

|              |                                                                                                                                                                                                                                                                                                                                                                                                               |                  |             |                  |             |
|--------------|---------------------------------------------------------------------------------------------------------------------------------------------------------------------------------------------------------------------------------------------------------------------------------------------------------------------------------------------------------------------------------------------------------------|------------------|-------------|------------------|-------------|
| "DMRT2"      | MA0035.2.Gata1 MA0048.1.NHLH1 MA0063.1.Nkx2-5 MA0065.2.PPARG::RXRA MA0056.1.MZF1_1-4 MA0090.1.TEAD1 MA0092.1.Hand1::Tcf2a MA0055.1.Myf MA0027.1.En1 MA0028.1.ELK1 MA0111.1.Spz1 MA0112.2.ESR1 MA0113.1.NR3C1 MA0117.1.Mafb MA0125.1.Nobox MA0130.1.ZNF354C MA0144.1.Stat3 MA0152.1.NFATC2 MA0157.1.FOXO3 MA0161.1.NFIC MA0095.1.YY1 MA0101.1.REL MA0107.1.RELA MA0084.1.SRY MA0074.1.RXRA::VDR MA0442.1.SOX10 | <b>49.792314</b> | 1.049091326 | <b>50.945784</b> | 0.993366826 |
| "FHIT"       | MA0105.1.NFKB1                                                                                                                                                                                                                                                                                                                                                                                                | <b>49.792314</b> | 1.107902438 | <b>14.05416</b>  | 0.8747493   |
| "hCG_181549" | MA0071.1.RORA_1                                                                                                                                                                                                                                                                                                                                                                                               | <b>49.792314</b> | 1.053749103 | <b>0.520402</b>  | 1.20043505  |
| "KIAA1715"   | MA0033.1.FOXL1                                                                                                                                                                                                                                                                                                                                                                                                | <b>49.792314</b> | 0.926223105 | <b>45.966351</b> | 0.980166021 |
| "LOC1001306" | MA0009.1.T MA0141.1.Esrrb MA0068.1.Pax4                                                                                                                                                                                                                                                                                                                                                                       | <b>49.792314</b> | 1.063926475 | <b>14.05416</b>  | 1.13275678  |
| "LOC144817"  | MA0149.1.EWSR1-FLI1 MA0079.2.SP1 MA0442.1.SOX10 MA0056.1.MZF1_1-4                                                                                                                                                                                                                                                                                                                                             | <b>49.792314</b> | 1.063289835 | <b>24.919109</b> | 0.910141042 |
| "LOC441601"  | MA0032.1.FOXC1 MA0061.1.NF-kappaB MA0132.1.Pdx1 MA0151.1.ARID3A MA0101.1.REL MA0117.1.Mafb MA0158.1.HOXA5 MA0154.1.EBF1                                                                                                                                                                                                                                                                                       | <b>49.792314</b> | 1.064816985 | <b>37.305898</b> | 0.966912799 |
| "LOC641365"  | MA0048.1.NHLH1 MA0259.1.HIF1A::ARNT                                                                                                                                                                                                                                                                                                                                                                           | <b>49.792314</b> | 1.039187998 | <b>37.305898</b> | 1.045880841 |
| "LOC642891"  | MA0145.1.Tcfcp2l1                                                                                                                                                                                                                                                                                                                                                                                             | <b>49.792314</b> | 1.097120793 | <b>5.7461843</b> | 0.858612661 |

|             |                                                                                                                                                                         |                  |             |                  |             |
|-------------|-------------------------------------------------------------------------------------------------------------------------------------------------------------------------|------------------|-------------|------------------|-------------|
| "LOC727924" | MA0003.1.TFAP2A MA0006.1.Arnt:: <b>Ahr</b><br> MA0057.1.MZF1_5-<br>13 MA0079.2.SP1 MA0055.1.Myf MA00<br>56.1.MZF1_1-<br>4 MA0119.1.TLX1::NFIC MA0154.1.EBF<br>1         | <b>49.792314</b> | 1.036972888 | <b>37.305898</b> | 0.975907897 |
| "LOC730227" | MA0147.1.Myc                                                                                                                                                            | <b>49.792314</b> | 1.095822    | <b>24.919109</b> | 0.925437955 |
| "METTL9"    | MA0057.1.MZF1_5-<br>13 MA0067.1.Pax2 MA0056.1.MZF1_1-<br>4 MA0098.1.ETS1 MA0105.1.NFKB1 MA<br>0153.1.HNF1B MA0159.1.RXR:: <b>RAR_DR</b><br>5 MA0079.2.SP1 MA0080.2.SPI1 | <b>49.792314</b> | 1.075624895 | <b>24.919109</b> | 1.071118153 |
| "MEX3B"     | MA0104.2.Mycn MA0147.1.Myc MA0055<br>.1.Myf MA0073.1.RREB1                                                                                                              | <b>49.792314</b> | 1.045492222 | <b>53.049636</b> | 1.007175268 |
| "MPV17L"    | MA0162.1.Egr1 MA0163.1.PLAG1 MA00<br>70.1. <b>PBX1</b>                                                                                                                  | <b>49.792314</b> | 1.13925159  | <b>0.1540868</b> | 0.712569502 |
| "NUDT7"     | MA0033.1.FOXL1                                                                                                                                                          | <b>49.792314</b> | 1.063829689 | <b>45.966351</b> | 0.975405278 |
| "PLA2R1"    | MA0073.1.RREB1 MA0079.2.SP1                                                                                                                                             | <b>49.792314</b> | 1.061783382 | <b>24.919109</b> | 1.06154859  |

|           |                                                                                                                                                                                                                                                                                                                                                                                                                                                                                                                                         |                  |             |                  |             |
|-----------|-----------------------------------------------------------------------------------------------------------------------------------------------------------------------------------------------------------------------------------------------------------------------------------------------------------------------------------------------------------------------------------------------------------------------------------------------------------------------------------------------------------------------------------------|------------------|-------------|------------------|-------------|
| "SCN8A"   | MA0027.1.En1 MA0028.1.ELK1 MA0029.1.Evi1 MA0033.1.FOXL1 MA0035.2.Gata1 MA0036.1.GATA2 MA0037.1.GATA3 MA0038.1.Gfi MA0043.1.HLF MA0002.2.RUNX1 MA0003.1.TFAP2A MA0004.1.Arnt MA0018.2.CREB1 MA0060.1.NFYA MA0063.1.Nkx2-5 MA0067.1.Pax2 MA0070.1.PBX1 MA0078.1.Sox17 MA0079.2.SP1 MA0080.2.SPI1 MA0081.1.SPIB MA0088.1.znf143 MA0089.1.NFE2L1::MafG MA0091.1.TAL1::TCF3 MA0092.1.Hand1::Tcf2a MA0093.1.USF1 MA0095.1.YY1 MA0098.1.ETS1 MA0099.2.AP1 MA0101.1.REL MA0103.1.ZEB1 MA0105.1.NFKB1 MA0109.1.Hitf MA0113.1.NR3C1 MA0117.1.Mafb | <b>49.792314</b> | 1.085185448 | <b>14.05416</b>  | 1.117350925 |
| "SLC37A1" | MA0024.1.E2F1 MA0027.1.En1 MA0056.1.MZF1_1-4 MA0099.2.AP1 MA0103.1.ZEB1 MA0442.1.SOX10                                                                                                                                                                                                                                                                                                                                                                                                                                                  | <b>49.792314</b> | 1.053929711 | <b>24.919109</b> | 0.942341098 |
| "USP14"   | MA0137.2.STAT1 MA0004.1.Arnt MA0059.1.MYC::MAX MA0147.1.Myc                                                                                                                                                                                                                                                                                                                                                                                                                                                                             | <b>49.792314</b> | 1.054509557 | <b>24.919109</b> | 0.948909134 |

|              |                                                                                                                                                     |                  |             |                  |             |
|--------------|-----------------------------------------------------------------------------------------------------------------------------------------------------|------------------|-------------|------------------|-------------|
| "XKR6"       | MA0080.2.SPI1                                                                                                                                       | <b>49.792314</b> | 0.927455909 | <b>53.049636</b> | 1.002082659 |
| "ZMAT4"      | MA0006.1.Arnt:: <b>Ahr</b>  MA0042.1.FOXI1 <br>MA0073.1.RREB1 MA0162.1.Egr1                                                                         | <b>49.792314</b> | 1.077372706 | <b>45.966351</b> | 1.043303652 |
| "ADAM23"     | MA0042.1.FOXI1 MA0025.1.NFIL3                                                                                                                       | <b>65.861377</b> | 0.933311212 | <b>37.305898</b> | 0.959019738 |
| "ATAD3A"     | MA0046.1.HNF1A                                                                                                                                      | <b>65.861377</b> | 1.015793416 | <b>14.05416</b>  | 1.098051269 |
| "C3orf21"    | MA0067.1.Pax2 MA0014.1.Pax5 MA008<br>3.1.SRF MA0003.1.TFAP2A MA0159.1.R<br>XR:: <b>RAR_DR5</b>                                                      | <b>65.861377</b> | 0.935826814 | <b>45.966351</b> | 0.986184057 |
| "C7orf50"    | MA0041.1.Foxd3 MA0033.1.FOXL1                                                                                                                       | <b>65.861377</b> | 1.018505404 | <b>24.919109</b> | 1.072816705 |
| "DKFZp686A1" | MA0032.1.FOXC1 MA0089.1.NFE2L1:: <b>M<br/>afG</b>                                                                                                   | <b>65.861377</b> | 1.017742932 | <b>45.966351</b> | 1.040190303 |
| "EDAR"       | MA0122.1.Nkx3-2                                                                                                                                     | <b>65.861377</b> | 1.018132462 | <b>5.7461843</b> | 0.863113338 |
| "FBXO31"     | MA0035.2.Gata1 MA0027.1.En1 MA009<br>5.1.YY1 MA0073.1.RREB1 MA0056.1.M<br>ZF1_1-<br>4 MA0117.1.Mafb MA0037.1.GATA3 MA<br>0140.1.Tal1:: <b>Gata1</b> | <b>65.861377</b> | 1.031467052 | <b>37.305898</b> | 0.970439589 |
| "LOC150185"  | MA0004.1.Arnt MA0014.1.Pax5 MA0055<br>.1.Myf MA0093.1.USF1 MA0117.1.Mafb <br>MA0048.1.NHLH1 MA0133.1.BRCA1                                          | <b>65.861377</b> | 1.027498862 | <b>37.305898</b> | 0.959650186 |
| "LOC284600"  | MA0030.1.FOXF2 MA0056.1.MZF1_1-<br>4 MA0145.1.Tcfcp2l1                                                                                              | <b>65.861377</b> | 0.925975539 | <b>50.945784</b> | 0.984463923 |
| "LOC654342"  | MA0090.1.TEAD1 MA0098.1.ETS1 MA0<br>061.1.NF-<br>kappaB MA0107.1.RELA MA0101.1.REL <br>MA0105.1.NFKB1                                               | <b>65.861377</b> | 1.084894353 | <b>0</b>         | 0.612496714 |
| "MARCKS"     | MA0061.1.NF-kappaB                                                                                                                                  | <b>65.861377</b> | 1.013841402 | <b>5.7461843</b> | 1.099476716 |
| "MGC21881"   | MA0163.1.PLAG1                                                                                                                                      | <b>65.861377</b> | 0.929597089 | <b>37.305898</b> | 0.950666181 |
| "NEDD4L"     | MA0106.1.TP53 MA0133.1.BRCA1                                                                                                                        | <b>65.861377</b> | 0.920046483 | <b>14.05416</b>  | 1.122532397 |
| "NPPA"       | MA0159.1.RXR:: <b>RAR_DR5</b>                                                                                                                       | <b>65.861377</b> | 1.044390019 | <b>14.05416</b>  | 1.157277378 |
| "PDLIM5"     | MA0036.1.GATA2                                                                                                                                      | <b>65.861377</b> | 1.028157573 | <b>50.945784</b> | 1.017874716 |

|             |                                                                                                                                                                                                                                                                                                                                                                                                                                                                                                                                                                                                              |                  |             |                  |             |
|-------------|--------------------------------------------------------------------------------------------------------------------------------------------------------------------------------------------------------------------------------------------------------------------------------------------------------------------------------------------------------------------------------------------------------------------------------------------------------------------------------------------------------------------------------------------------------------------------------------------------------------|------------------|-------------|------------------|-------------|
| "POR"       | MA0003.1.TFAP2A MA0014.1.Pax5 MA0028.1.ELK1 MA0032.1.FOXC1 MA0018.2.CREB1 MA0027.1.En1 MA0048.1.NHLH1 MA0055.1.Myf MA0070.1. <b>PBX1</b>  MA0071.1.RORA_1 MA0076.1.ELK4 MA0077.1. <b>SOX9</b>  MA0078.1.Sox17 MA0079.2.SP1 MA0080.2.SPI1 MA0084.1.SRY MA0088.1.znf143 MA0036.1.GATA2 MA0037.1.GATA3 MA0095.1.YY1 MA0098.1.ETS1 MA0099.2.AP1 MA0103.1.ZEB1 MA0111.1.Spz1 MA0117.1.Mafb MA0130.1.ZNF354C MA0136.1.ELF5 MA0144.1.Sta3 MA0151.1.ARID3A MA0156.1.FEV MA0158.1.HOXA5 MA0160.1. <b>NR4A2</b>  MA0161.1.NFIC MA0164.1.Nr2e3 MA0258.1.ESR2 MA0442.1.SOX10 MA0089.1.NFE2L1::MafG MA0092.1.Hand1::Tcf2a | <b>65.861377</b> | 1.019253777 | <b>14.05416</b>  | 0.923088367 |
| "PPIF"      | MA0017.1. <b>NR2F1</b>                                                                                                                                                                                                                                                                                                                                                                                                                                                                                                                                                                                       | <b>65.861377</b> | 1.017673579 | <b>14.05416</b>  | 1.077351821 |
| "psiTPTE22" | MA0146.1.Zfx MA0052.1.MEF2A                                                                                                                                                                                                                                                                                                                                                                                                                                                                                                                                                                                  | <b>65.861377</b> | 1.031886304 | <b>24.919109</b> | 1.059314368 |
| "RNF168"    | MA0144.1.Stat3                                                                                                                                                                                                                                                                                                                                                                                                                                                                                                                                                                                               | <b>65.861377</b> | 0.915974226 | <b>5.7461843</b> | 1.17139959  |
| "SLC30A8"   | MA0061.1.NF-kappaB MA0101.1.REL MA0107.1.RELA                                                                                                                                                                                                                                                                                                                                                                                                                                                                                                                                                                | <b>65.861377</b> | 1.028761192 | <b>24.919109</b> | 0.939272783 |
| "SSH2"      | MA0014.1.Pax5 MA0057.1.MZF1_5-13 MA0068.1.Pax4 MA0079.2.SP1 MA0088.1.znf143 MA0119.1.TLX1::NFIC                                                                                                                                                                                                                                                                                                                                                                                                                                                                                                              | <b>65.861377</b> | 1.024659158 | <b>24.919109</b> | 0.950527889 |
| "THRA"      | MA0048.1.NHLH1                                                                                                                                                                                                                                                                                                                                                                                                                                                                                                                                                                                               | <b>65.861377</b> | 1.018271543 | <b>50.945784</b> | 1.013312408 |

|              |                                                                                                                                                                                                                                                                     |                  |             |                  |             |
|--------------|---------------------------------------------------------------------------------------------------------------------------------------------------------------------------------------------------------------------------------------------------------------------|------------------|-------------|------------------|-------------|
| "TUBGCP5"    | MA0003.1.TFAP2A MA0055.1.Myf MA0037.1.GATA3 MA0056.1.MZF1_1-4 MA0073.1.RREB1 MA0079.2.SP1 MA0093.1.USF1 MA0112.2.ESR1 MA0117.1.Mafb MA0119.1.TLX1::NFIC MA0057.1.MZF1_5-13 MA0068.1.Pax4 MA0130.1.ZNF354C MA0133.1.BRCA1 MA0154.1.EBF1 MA0160.1.NR4A2 MA0161.1.NFIC | <b>65.861377</b> | 1.030435126 | <b>37.305898</b> | 1.05016892  |
| "ZNF518B"    | MA0163.1.PLAG1 MA0004.1.Arnt MA0079.2.SP1                                                                                                                                                                                                                           | <b>65.861377</b> | 0.9408506   | <b>45.966351</b> | 0.985818401 |
| "ZNF70"      | MA0018.2.CREB1 MA0027.1.En1 MA0032.1.FOXC1 MA0063.1.Nkx2-5 MA0087.1.Sox5 MA0124.1.NKX3-1 MA0157.1.FOXO3                                                                                                                                                             | <b>65.861377</b> | 1.045008635 | <b>1.6684098</b> | 1.168172922 |
| "AGAP1"      | MA0006.1.Arnt::Ahr MA0102.2.CEBPA MA0073.1.RREB1 MA0033.1.FOXL1 MA0042.1.FOXI1 MA0162.1.Egr1                                                                                                                                                                        | <b>69.16944</b>  | 0.909800848 | <b>1.6684098</b> | 1.300646832 |
| "AGL"        | MA0098.1.ETS1 MA0080.2.SPI1 MA0442.1.SOX10 MA0028.1.ELK1 MA0156.1.FEV MA0136.1.ELF5 MA0149.1.EWSR1-FLI1                                                                                                                                                             | <b>69.16944</b>  | 0.941091438 | <b>24.919109</b> | 0.929074054 |
| "CALN1"      | MA0116.1.Zfp423                                                                                                                                                                                                                                                     | <b>69.16944</b>  | 0.932667166 | <b>24.919109</b> | 1.096819749 |
| "CAPN2"      | MA0052.1.MEF2A                                                                                                                                                                                                                                                      | <b>69.16944</b>  | 0.953979742 | <b>24.919109</b> | 0.953968055 |
| "DENND3"     | MA0095.1.YY1 MA0070.1.PBX1 MA0014.1.Pax5 MA0036.1.GATA2 MA0130.1.ZNF354C MA0098.1.ETS1                                                                                                                                                                              | <b>69.16944</b>  | 0.944989858 | <b>5.7461843</b> | 0.895625291 |
| "hCG_179509" | MA0083.1.SRF                                                                                                                                                                                                                                                        | <b>69.16944</b>  | 1.013144688 | <b>50.945784</b> | 0.987464275 |



|             |                                                                                                                                                                                                                                                                                                                                                                                                                                                                                                                                                       |                 |             |                  |             |
|-------------|-------------------------------------------------------------------------------------------------------------------------------------------------------------------------------------------------------------------------------------------------------------------------------------------------------------------------------------------------------------------------------------------------------------------------------------------------------------------------------------------------------------------------------------------------------|-----------------|-------------|------------------|-------------|
| "LOC375010" | MA0031.1.FOXD1 MA0033.1.FOXL1 MA0063.1.Nkx2-5 MA0078.1.Sox17 MA0052.1.MEF2A MA0061.1.NF-kappaB MA0101.1.REL MA0105.1.NFKB1 MA0083.1.SRF MA0084.1.SRY MA0157.1.FOXO3 MA0158.1.HOXA5 MA0442.1.SOX10 MA0107.1.RELA MA0133.1.BRC A1                                                                                                                                                                                                                                                                                                                       | <b>69.16944</b> | 0.941954529 | <b>24.919109</b> | 0.93868914  |
| "MAPK8"     | MA0024.1.E2F1                                                                                                                                                                                                                                                                                                                                                                                                                                                                                                                                         | <b>69.16944</b> | 1.00930392  | <b>24.919109</b> | 0.935437682 |
| "MCPH1"     | MA0018.2.CREB1 MA0025.1.NFIL3 MA0004.1.Arnt MA0033.1.FOXL1 MA0037.1.GATA3 MA0027.1.En1 MA0032.1.FOXC1 MA0056.1.MZF1_1-4 MA0059.1.MYC::MAX MA0038.1.Gfi M A0043.1. <b>HLF</b>  MA0093.1.USF1 MA0099.2.AP1 MA0101.1.REL MA0102.2.CEBPA MA0113.1. <b>NR3C1</b>  MA0114.1.HNF4A MA0117.1.Mafb MA0119.1.TLX1::NFIC MA0124.1.NKX3-1 MA0125.1.Nobox MA0130.1.ZNF354C MA0063.1.Nkx2-5 MA0092.1.Hand1::Tcf2a MA0142.1.Pou5f1 MA0151.1.ARID3A MA0152.1.NFATC2 MA0153.1.HNF1B MA0158.1.HOXA5 MA0160.1. <b>NR4A2</b>  MA0164.1.Nr2e3 MA0132.1.Pdx1 MA0133.1.BRCA1 | <b>69.16944</b> | 1.007788775 | <b>0.520402</b>  | 1.181917204 |

|          |                                                                                                                                                                                                                                                                                                                                                                                                                                                                                                                                                                                                                                                                                                                 |                  |             |                  |             |
|----------|-----------------------------------------------------------------------------------------------------------------------------------------------------------------------------------------------------------------------------------------------------------------------------------------------------------------------------------------------------------------------------------------------------------------------------------------------------------------------------------------------------------------------------------------------------------------------------------------------------------------------------------------------------------------------------------------------------------------|------------------|-------------|------------------|-------------|
| "PRNP"   | MA0018.2.CREB1 MA0019.1.Ddit3::Cebp MA0014.1.Pax5 MA0028.1.ELK1 MA0033.1.FOXL1 MA0025.1.NFIL3 MA0027.1.En1 MA0042.1.FOXI1 MA0043.1. <b>HLF</b>  MA0063.1.Nkx2-5 MA0067.1.Pax2 MA0068.1.Pax4 MA0070.1. <b>PBX1</b>  MA0071.1.RORA_1 MA0074.1.RXRA::VDR MA0077.1. <b>SOX9</b>  MA0078.1.Sox17 MA0079.2.SP1 MA0036.1.GATA2 MA0040.1.Foxq1 MA0087.1.Sox5 MA0088.1.znf143 MA0089.1.NFE2L1::MafG MA0095.1.YY1 MA0098.1.ETS1 MA0099.2.AP1 MA0102.2.CEBPA MA0113.1. <b>NR3C1</b>  MA0117.1.Mafb MA0132.1.Pdx1 MA0133.1.BRCA1 MA0135.1.Lhx3 MA0142.1.Pou5f1 MA0143.1.Sox2 MA0150.1.NFE2L2 MA0151.1.ARID3A MA0152.1.NFATC2 MA0153.1.HNF1B MA0160.1. <b>NR4A2</b>  MA0161.1.NFIC MA0442.1.SOX10 MA0081.1.SPIB MA0084.1.SRY | <b>69.16944</b>  | 1.012830772 | <b>14.05416</b>  | 0.9087468   |
| "RCN2"   | MA0146.1.Zfx MA0024.1.E2F1 MA0055.1.Myf MA0056.1.MZF1_1-4 MA0079.2.SP1                                                                                                                                                                                                                                                                                                                                                                                                                                                                                                                                                                                                                                          | <b>69.16944</b>  | 1.006142169 | <b>50.945784</b> | 1.018051886 |
| "SLAMF1" | MA0066.1.PPARG                                                                                                                                                                                                                                                                                                                                                                                                                                                                                                                                                                                                                                                                                                  | <b>69.16944</b>  | 0.935797391 | <b>14.05416</b>  | 0.88709559  |
| ACSM1    | MA0003.1.TFAP2A MA0043.1. <b>HLF</b>  MA0040.1.Foxq1 MA0066.1.PPARG MA0079.2.SP1 MA0081.1.SPIB MA0084.1.SRY MA0119.1.TLX1::NFIC MA0143.1.Sox2 MA0144.1.Stat3 MA0160.1. <b>NR4A2</b>  MA0442.1.SOX10 MA0046.1.HNF1A MA0058.1.MAX MA0063.1.Nkx2-5 MA0037.1.GATA3 MA0024.1.E2F1                                                                                                                                                                                                                                                                                                                                                                                                                                    | <b>69.16944</b>  | 1.001224525 | <b>37.305898</b> | 0.961188733 |
| "CEP250" | MA0057.1.MZF1_5-13 MA0079.2.SP1                                                                                                                                                                                                                                                                                                                                                                                                                                                                                                                                                                                                                                                                                 | <b>70.946791</b> | 0.961001827 | <b>53.049636</b> | 1.007770142 |

|              |                                                                                                                                                 |                  |             |                  |             |
|--------------|-------------------------------------------------------------------------------------------------------------------------------------------------|------------------|-------------|------------------|-------------|
| "DGKA"       | MA0164.1.Nr2e3                                                                                                                                  | <b>70.946791</b> | 0.933839729 | <b>0.1540868</b> | 0.762616274 |
| "KIF6"       | MA0042.1.FOXI1                                                                                                                                  | <b>70.946791</b> | 0.951758235 | <b>37.305898</b> | 0.948546717 |
| "SLAIN2"     | MA0042.1.FOXI1 MA0030.1.FOXP2 MA0259.1.HIF1A::ARNT                                                                                              | <b>70.946791</b> | 0.938253022 | <b>24.919109</b> | 1.085528605 |
| "SSH1"       | MA0036.1.GATA2 MA0039.2.Klf4 MA0057.1.MZF1_5-13 MA0070.1. <b>PBX1</b>  MA0073.1.RREB1 MA0162.1.Egr1 MA0095.1.YY1 MA0098.1.ETS1 MA0130.1.ZNF354C | <b>70.946791</b> | 0.958757592 | <b>37.305898</b> | 1.038010457 |
| "ZNF541"     | MA0068.1.Pax4 MA0076.1.ELK4                                                                                                                     | <b>70.946791</b> | 0.948489514 | <b>53.049636</b> | 1.01067928  |
| "ETFDH"      | MA0106.1.TP53                                                                                                                                   | <b>72.891972</b> | 0.947081839 | <b>5.7461843</b> | 1.168097378 |
| "FLCN"       | MA0083.1.SRF                                                                                                                                    | <b>72.891972</b> | 0.951691103 | <b>1.6684098</b> | 1.152586779 |
| "TTC5"       | MA0003.1.TFAP2A                                                                                                                                 | <b>72.891972</b> | 0.938019334 | <b>0</b>         | 1.346374531 |
| "ANXA10"     | MA0042.1.FOXI1                                                                                                                                  | <b>73.134386</b> | 0.987256466 | <b>5.7461843</b> | 0.870504858 |
| "ATXN10"     | MA0130.1.ZNF354C                                                                                                                                | <b>73.134386</b> | 0.978762545 | <b>24.919109</b> | 1.047946515 |
| "BAGE"       | MA0137.2.STAT1 MA0070.1. <b>PBX1</b>  MA0144.1.Stat3                                                                                            | <b>73.134386</b> | 0.977709828 | <b>14.05416</b>  | 0.930723627 |
| "BCL8"       | MA0164.1.Nr2e3 MA0079.2.SP1 MA0105.1.NFKB1                                                                                                      | <b>73.134386</b> | 0.972547876 | <b>24.919109</b> | 0.95204528  |
| "C18orf2"    | MA0033.1.FOXL1                                                                                                                                  | <b>73.134386</b> | 0.995745947 | <b>50.945784</b> | 1.014392455 |
| "CRYL1"      | MA0003.1.TFAP2A MA0163.1.PLAG1 MA0130.1.ZNF354C MA0067.1.Pax2                                                                                   | <b>73.134386</b> | 0.928496076 | <b>0.1540868</b> | 0.674396604 |
| "DYNLRB2"    | MA0091.1.TAL1::TCF3 MA0033.1.FOXL1 MA0007.1.Ar MA0025.1.NFIL3                                                                                   | <b>73.134386</b> | 0.982066384 | <b>37.305898</b> | 1.063531189 |
| "FAM100A"    | MA0073.1.RREB1 MA0162.1.Egr1 MA0042.1.FOXI1 MA0006.1.Arnt:: <b>Ahr</b>                                                                          | <b>73.134386</b> | 0.984554055 | <b>50.945784</b> | 0.994877753 |
| "GNAO1"      | MA0073.1.RREB1 MA0162.1.Egr1 MA0006.1.Arnt:: <b>Ahr</b>  MA0042.1.FOXI1                                                                         | <b>73.134386</b> | 0.987758173 | <b>53.049636</b> | 1.00342142  |
| "HMGA1"      | MA0105.1.NFKB1 MA0068.1.Pax4 MA0101.1.REL MA0061.1.NF-kappaB                                                                                    | <b>73.134386</b> | 0.994923342 | <b>24.919109</b> | 0.947282222 |
| "KCNJ14"     | MA0155.1.INSM1 MA0092.1.Hand1::Tcf e2a MA0068.1.Pax4                                                                                            | <b>73.134386</b> | 0.983589611 | <b>53.049636</b> | 1.001286072 |
| "KCNN4"      | MA0116.1.Zfp423                                                                                                                                 | <b>73.134386</b> | 0.953192036 | <b>5.7461843</b> | 0.857885966 |
| "LOC1001315" | MA0069.1.Pax6                                                                                                                                   | <b>73.134386</b> | 0.989041616 | <b>53.049636</b> | 1.006068094 |

|             |                                                                                                                                                                       |                  |             |                  |             |
|-------------|-----------------------------------------------------------------------------------------------------------------------------------------------------------------------|------------------|-------------|------------------|-------------|
| "LOC283788" | MA0089.1.NFE2L1::MafG MA0147.1.Myc MA0059.1.MYC::MAX                                                                                                                  | <b>73.134386</b> | 0.951713191 | <b>0</b>         | 0.394165531 |
| "LOC339166" | MA0014.1.Pax5 MA0028.1.ELK1 MA0098.1.ETS1 MA0136.1.ELF5 MA0079.2.SP1 MA0080.2.SPI1 MA0442.1.SOX10 MA0152.1.NFATC2 MA0156.1.FEV                                        | <b>73.134386</b> | 0.991772691 | <b>37.305898</b> | 0.955651083 |
| "LPXN"      | MA0119.1.TLX1::NFIC                                                                                                                                                   | <b>73.134386</b> | 0.96588317  | <b>5.7461843</b> | 1.134561478 |
| "MARVELD3"  | MA0079.2.SP1                                                                                                                                                          | <b>73.134386</b> | 0.988961913 | <b>14.05416</b>  | 1.092247016 |
| "MGC34800"  | MA0055.1.Myf MA0139.1.CTCF MA0018.2.CREB1 MA0141.1.Esrrb                                                                                                              | <b>73.134386</b> | 0.947862957 | <b>1.6684098</b> | 0.823619181 |
| "MTMR15"    | MA0115.1.NR1H2::RXRA                                                                                                                                                  | <b>73.134386</b> | 0.977121567 | <b>14.05416</b>  | 0.930626148 |
| "NKD2"      | MA0018.2.CREB1 MA0033.1.FOXL1 MA0036.1.GATA2 MA0042.1.FOXI1 MA0068.1.Pax4 MA0073.1.RREB1 MA0040.1.Foxq1 MA0151.1.ARID3A MA0162.1.Egr1 MA0095.1.YY1 MA0006.1.Arnt::Ahr | <b>73.134386</b> | 0.975974173 | <b>37.305898</b> | 1.038438157 |
| "PLD5"      | MA0130.1.ZNF354C                                                                                                                                                      | <b>73.134386</b> | 0.94445617  | <b>14.05416</b>  | 1.180436091 |
| "PSMF1"     | MA0024.1.E2F1 MA0059.1.MYC::MAX MA0102.2.CEBPA                                                                                                                        | <b>73.134386</b> | 0.992857539 | <b>14.05416</b>  | 0.908578915 |
| "PSPH"      | MA0055.1.Myf MA0067.1.Pax2 MA0083.1.SRF MA0164.1.Nr2e3                                                                                                                | <b>73.134386</b> | 0.980648276 | <b>1.6684098</b> | 1.123787055 |
| "SUPT4H1"   | MA0125.1.Nobox                                                                                                                                                        | <b>73.134386</b> | 0.964916112 | <b>24.919109</b> | 1.060557954 |

|            |                                                                                                                                                                                                                                                                                                                                                                                                                                                                                         |                  |             |                  |             |
|------------|-----------------------------------------------------------------------------------------------------------------------------------------------------------------------------------------------------------------------------------------------------------------------------------------------------------------------------------------------------------------------------------------------------------------------------------------------------------------------------------------|------------------|-------------|------------------|-------------|
| "TARSL2"   | MA0004.1.Arnt MA0006.1.Arnt:: <b>Ahr</b>  MA0018.2.CREB1 MA0007.1.Ar MA0028.1.ELK1 MA0029.1.Evi1 MA0019.1.Ddit3::Cebpa MA0032.1.FOXC1 MA0038.1.Gfi MA0039.2.Klf4 MA0041.1.Foxd3 MA0048.1.NHLH1 MA0055.1.Myf MA0058.1.MAX MA0059.1.MYC::MAX MA0031.1.FOXD1 MA0067.1.Pax2 MA0069.1.Pax6 MA0071.1.RORA_1 MA0076.1.ELK4 MA0079.2.SP1 MA0090.1.TEAD1 MA0093.1.USF1 MA0104.2.Mycn MA0063.1.Nkx2-5 MA0002.2.RUNX1 MA0158.1.HOXA5 MA0162.1.Egr1 MA0150.1.NFE2L2 MA0152.1.NFATC2 MA0122.1.Nkx3-2 | <b>73.134386</b> | 0.969381375 | <b>0.1540868</b> | 0.801423138 |
| "TMPRSS13" | MA0073.1.RREB1 MA0105.1.NFKB1 MA0116.1.Zfp423 MA0149.1.EWSR1-FLI1 MA0163.1.PLAG1                                                                                                                                                                                                                                                                                                                                                                                                        | <b>73.134386</b> | 0.980495614 | <b>45.966351</b> | 0.975040011 |
| "TNIP1"    | MA0101.1.REL                                                                                                                                                                                                                                                                                                                                                                                                                                                                            | <b>73.134386</b> | 0.979340195 | <b>24.919109</b> | 0.941296001 |
| "UBE4B"    | MA0068.1.Pax4 MA0073.1.RREB1 MA0079.2.SP1                                                                                                                                                                                                                                                                                                                                                                                                                                               | <b>73.134386</b> | 0.965198154 | <b>0.520402</b>  | 1.22973899  |

|         |                                                                                                                                                                                                                                                                                                                                                                                                                                                                                                                                                                                                                                                                                                                                                                                                                                                                                                                                             |                  |             |                 |             |
|---------|---------------------------------------------------------------------------------------------------------------------------------------------------------------------------------------------------------------------------------------------------------------------------------------------------------------------------------------------------------------------------------------------------------------------------------------------------------------------------------------------------------------------------------------------------------------------------------------------------------------------------------------------------------------------------------------------------------------------------------------------------------------------------------------------------------------------------------------------------------------------------------------------------------------------------------------------|------------------|-------------|-----------------|-------------|
| "USP22" | MA0002.2.RUNX1 MA0003.1.TFAP2A M<br>A0006.1.Arnt:: <b>Ahr</b>  MA0018.2.CREB1 M<br>A0027.1.En1 MA0036.1.GATA2 MA0038<br>.1.Gfi MA0063.1.Nkx2-<br>5 MA0067.1.Pax2 MA0068.1.Pax4 MA0<br>070.1. <b>PBX1</b>  MA0073.1.RREB1 MA0078.<br>1.Sox17 MA0079.2.SP1 MA0081.1.SPIB<br> MA0084.1.SRY MA0040.1.Foxq1 MA00<br>56.1.MZF1_1-4 MA0057.1.MZF1_5-<br>13 MA0061.1.NF-<br>kappaB MA0092.1.Hand1::Tcf2a MA00<br>95.1.YY1 MA0098.1.ETS1 MA0099.2.AP<br>1 MA0100.1. <b>Myb</b>  MA0101.1.REL MA01<br>02.2.CEBPA MA0105.1.NFKB1 MA0107.<br>1.RELA MA0108.2.TBP MA0109.1.Hltf M<br>A0111.1.Spz1 MA0113.1. <b>NR3C1</b>  MA01<br>30.1.ZNF354C MA0133.1.BRCA1 MA013<br>5.1.Lhx3 MA0136.1.ELF5 MA0151.1.ARI<br>D3A MA0152.1.NFATC2 MA0154.1.EBF1<br> MA0155.1.INSM1 MA0156.1.FEV MA01<br>58.1.HOXA5 MA0160.1. <b>NR4A2</b>  MA0161<br>.1.NFIC MA0162.1.Egr1 MA0442.1.SOX<br>10 MA0090.1.TEAD1 MA0087.1.Sox5 M<br>A0088.1.znf143 MA0089.1.NFE2L1::Maf<br>G | <b>73.134386</b> | 0.990735385 | <b>14.05416</b> | 0.939636945 |
|---------|---------------------------------------------------------------------------------------------------------------------------------------------------------------------------------------------------------------------------------------------------------------------------------------------------------------------------------------------------------------------------------------------------------------------------------------------------------------------------------------------------------------------------------------------------------------------------------------------------------------------------------------------------------------------------------------------------------------------------------------------------------------------------------------------------------------------------------------------------------------------------------------------------------------------------------------------|------------------|-------------|-----------------|-------------|

**Differentially expressed genes between PFO vs PT, nearby a TFBS with a significant turnover**

| SYMBOL     | TF                                                                                                                                                                                             | chr   | Phascons start | Phascons end | Gene start | Gene end  |
|------------|------------------------------------------------------------------------------------------------------------------------------------------------------------------------------------------------|-------|----------------|--------------|------------|-----------|
| "CA10"     | MA0089.1.NFE2L1::MafG MA0122.1.Nkx3-2 MA0068.1.Pax4 MA0033.1.FOXL1 MA0154.1.EBF1 MA0032.1.FOXC1 MA0027.1.En1                                                                                   | 17chr | 48538105       | 48538371     | 47062672   | 47592367  |
| "WBSCR17"  | MA0146.1.Zfx                                                                                                                                                                                   | chr7  | 71663666       | 71663746     | 70768371   | 70816520  |
| "MDGA1"    | MA0114.1.HNF4A                                                                                                                                                                                 | chr6  | 38700951       | 38701333     | 37708271   | 37710012  |
| "PDE4DIP"  | MA0156.1.FEV MA0055.1.Myf                                                                                                                                                                      | chr1  | 143232099      | 143232519    | 143388229  | 143751301 |
| "SORCS1"   | MA0046.1.HNF1A                                                                                                                                                                                 | chr10 | 108799369      | 108799525    | 108323410  | 108479862 |
| "COL12A1"  | MA0033.1.FOXL1 MA0006.1.Arnt::Ahr                                                                                                                                                              | chr6  | 76519878       | 76519905     | 75850761   | 75851940  |
| "FLJ41649" | MA0009.1.T MA0037.1.GATA3                                                                                                                                                                      | chr6  | 41184784       | 41184851     | 40433330   | 40435198  |
| "NFE2L3"   | MA0073.1.RREB1                                                                                                                                                                                 | chr7  | 26986036       | 26986282     | 26192836   | 26193270  |
| "OCA2"     | MA0037.1.GATA3 MA0056.1.MZF1_1-4 MA0073.1.RREB1 MA0079.2.SP1 MA0105.1.NFKB1 MA0057.1.MZF1_5-13 MA0068.1.Pax4                                                                                   | chr15 | 26574366       | 26574521     | 25673627   | 26018061  |
| "OCA2"     | MA0105.1.NFKB1                                                                                                                                                                                 | chr15 | 26772538       | 26772806     | 25673627   | 26018061  |
| "PTPN13"   | MA0035.2.Gata1, MA0037.1.GATA3, MA0055.1.Myf, MA0067.1.Pax2, MA0117.1.Mafb, MA0051.1.IRF2, MA0089.1.NFE2L1::MafG, MA0050.1.IRF1, MA0111.1.Spz1, MA0063.1.Nkx2-5, MA0018.2.CREB1, MA0133.1.BRCA | chr4  | 88755260       | 88755453     | 87734908   | 87955326  |

|          |                                                                                                                                                               |       |           |           |           |           |
|----------|---------------------------------------------------------------------------------------------------------------------------------------------------------------|-------|-----------|-----------|-----------|-----------|
| "PTPN13" | MA0035.2.Gata1<br>MA0100.1. <b>Myb</b><br>MA0133.1.BRCA1<br>MA0067.1.Pax2<br>MA0055.1. <b>Myf</b><br>MA0089.1.NFE2L1::MafG<br>MA0037.1.GATA3<br>MA0111.1.Spz1 | chr4  | 88755553  | 88755687  | 87734908  | 87955326  |
| "SORCS1" | MA0046.1.HNF1A                                                                                                                                                | chr10 | 108799369 | 108799525 | 108323410 | 108479862 |
| "ELAVL2" | MA0163.1.PLAG1                                                                                                                                                | chr9  | 24344040  | 24344156  | 23680104  | 23811755  |
| "LPHN3"  | MA0028.1.ELK1 MA0088.1.znf143 MA0090.1.TEAD1 MA0136.1.ELF5 MA0149.1.EWSR1-FLI1 MA0081.1.SPIB MA0079.2.SP1                                                     | chr4  | 60972079  | 60972149  | 61749969  | 62620762  |
| "NLGN1"  | MA0115.1.NR1H2::RXRA                                                                                                                                          | chr3  | 176112355 | 176112494 | 174785170 | 175483607 |
| "PARP8"  | MA0162.1.Egr1 MA0006.1.Arnt:: <b>Ahr</b>  MA0042.1.FOXI1                                                                                                      | chr5  | 51045261  | 51045318  | 50125832  | 50173926  |
| "RPH3A"  | MA0042.1.FOXI1 MA0073.1.RREB1 MA0084.1.SRY                                                                                                                    | chr12 | 112442592 | 112442646 | 111714038 | 111821065 |
| "XYLT1"  | MA0151.1.ARID3A                                                                                                                                               | chr16 | 18252002  | 18252258  | 17108754  | 17260859  |
| "ZNF438" | MA0073.1.RREB1 MA0006.1.Arnt:: <b>Ahr</b>  MA0042.1.FOXI1 MA0068.1.Pax4 MA0162.1.Egr1                                                                         | chr10 | 31856208  | 31856367  | 31173572  | 31174200  |
| "ZNF488" | MA0061.1.NF-kappaB MA0068.1.Pax4 MA0073.1.RREB1 MA0107.1.RELA MA0133.1.BRCA1 MA0142.1.Pou5f1 MA0158.1.HOXA5                                                   | chr10 | 47807445  | 47807627  | 47993159  | 47993870  |



|             |                                                                                                    |      |           |           |           |           |
|-------------|----------------------------------------------------------------------------------------------------|------|-----------|-----------|-----------|-----------|
| "ANKRD18A"  | MA0002.2.RUNX1 MA0028.1.ELK1 MA0027.1.En1 MA0063.1.Nkx2-5 MA0014.1.Pax5 MA0017.1. <b>NR2F1</b>  MA | chr9 | 39475371  | 39475990  | 38584546  | 38584999  |
| "EFNA5"     | MA0070.1. <b>PBX1</b>  MA0038.1.Gfi                                                                | chr5 | 105771562 | 105771788 | 106740493 | 106741397 |
| "LOC440570" | MA0019.1.Ddit3::Cebpa MA0122.1.Nkx3-2                                                              | chr1 | 17890027  | 17890129  | 17072149  | 17073164  |
| "RSPO3"     | MA0091.1.TAL1::TCF3                                                                                | chr6 | 127998066 | 127998096 | 127559192 | 127559871 |

## Supplementary table 4

| SYMBOL      | GENENAME                                                                                     | TF with a TFBS turnover FDR<0,05                                                                                                                                                                                                                                                      |
|-------------|----------------------------------------------------------------------------------------------|---------------------------------------------------------------------------------------------------------------------------------------------------------------------------------------------------------------------------------------------------------------------------------------|
| "CA10"      | carbonic anhydrase X                                                                         | Nkx3-2, Pax4, FOXL1, EBF1, FOXC1, En1,NFE2L1::MafG                                                                                                                                                                                                                                    |
| "WBSCR17"   | Williams-Beuren syndrome chromosome region 17                                                | Zfx                                                                                                                                                                                                                                                                                   |
| "MDGA1"     | MAM domain containing glycosylphosphatidylinositol anchor 1                                  | HNF4A                                                                                                                                                                                                                                                                                 |
| "PDE4DIP"   | phosphodiesterase 4D interacting protein                                                     | FEV, Myf                                                                                                                                                                                                                                                                              |
| "SORCS1"    | sortilin-related VPS10 domain containing receptor 1                                          | HNF1A                                                                                                                                                                                                                                                                                 |
| "COL12A1"   | collagen, type XII, alpha 1                                                                  | FOXL1, <b>Arnt::Ahr</b>                                                                                                                                                                                                                                                               |
| "FLJ41649"  | hypothetical LOC401260                                                                       | GATA3,                                                                                                                                                                                                                                                                                |
| "NFE2L3"    | nuclear factor (erythroid-derived 2)-like 3                                                  | RREB1                                                                                                                                                                                                                                                                                 |
| "OCA2"      | oculocutaneous albinism II                                                                   | GATA3, MZF1_1-4, RREB1, SP1, NFKB1, MZF1_5-13, Pax4, NFKB1                                                                                                                                                                                                                            |
| "PTPN13"    | protein tyrosine phosphatase, non-receptor type 13 (APO-1/CD95 (Fas)-associated phosphatase) | Gata1, GATA3, <b>Myf</b> , Pax2, Mafb, <b>IRF2</b> , IRF1, Spz1, Nkx2-5, CREB1, NFE2L1::MafG, <b>Myb</b> , BRCA1                                                                                                                                                                      |
| "ELAVL2"    | ELAV (embryonic lethal, abnormal vision, Drosophila)-like 2 (Hu antigen B)                   | PLAG1                                                                                                                                                                                                                                                                                 |
| "LPHN3"     | latrophilin 3                                                                                | ELK1, znf143, TEAD1, ELF5, EWSR1-FLI1, SPIB, SP1                                                                                                                                                                                                                                      |
| "NLGN1"     | neuroligin 1                                                                                 | NR1H2::RXRA                                                                                                                                                                                                                                                                           |
| "PARP8"     | poly (ADP-ribose) polymerase family, member 8                                                | Egr1, FOXI1, <b>Arnt::Ahr</b>                                                                                                                                                                                                                                                         |
| "RPH3A"     | rabphilin 3A homolog (mouse)                                                                 | FOXI1, RREB1, SRY                                                                                                                                                                                                                                                                     |
| "XYLT1"     | xylosyltransferase I                                                                         | ARID3A                                                                                                                                                                                                                                                                                |
| "ZNF438"    | zinc finger protein 438                                                                      | RREB1, FOXI1, Pax4, Egr1, <b>Arnt::Ahr</b>                                                                                                                                                                                                                                            |
| "ZNF488"    | zinc finger protein 488                                                                      | NF-kappaB, Pax4, RREB1, RELA, BRCA1, Pou5f1, HOXA5                                                                                                                                                                                                                                    |
| "ANKRD18A"  | ankyrin repeat domain 18A                                                                    | RUNX1, ELK1, En1, Nkx2-5, Pax5, <b>NR2F1</b> , MZF1_5-13, SRY, znf143, YY1, ETS1, AP1, CEBPA, Hltf, ESR1, SP1, SPI1, SPIB, Pdx1, BRCA1, ELF5, Esrrb, ARID3A, NFATC2, HNF1B, EBF1, FEV, <b>NR4A2</b> , SOX10, <b>NR3C1</b> , Mafb, Nkx3-2, FOXL1, MZF1_1-4, NFE2L1::MafG, Hand1::Tcf2a |
| "EFNA5"     | ephrin-A5                                                                                    | <b>PBX1</b> , Gfi                                                                                                                                                                                                                                                                     |
| "LOC440570" | LOC440570                                                                                    | Nkx3-2, Ddit3::Cebpa                                                                                                                                                                                                                                                                  |
| "RSPO3"     | R-spondin 3 homolog (Xenopus laevis)                                                         | TAL1::TCF3                                                                                                                                                                                                                                                                            |

## **Supplementary table 5**

### **Differentially expressed genes between PFOvsPT, differentially regulated by Hum/Chimp FoxP2**

| <b>SYMBOL</b> | <b>PFOvsPT.d</b> | <b>PFOvsPT.FC</b> | <b>PFOvsPT.q</b> | <b>Hum/Chimp Foxp2 differentially regulated genes</b> | <b>Hum/Chimp Foxp2 similarly regulated genes</b> |
|---------------|------------------|-------------------|------------------|-------------------------------------------------------|--------------------------------------------------|
| FSTL5         | -9.13405901      | 5.144152677       | 0                | FSTL5                                                 | NA                                               |
| TFAP2D        | -3.50782293      | 3.658017759       | 0                | TFAP2D                                                | NA                                               |
| PCDH17        | -5.06712243      | 2.341529223       | 0                | PCDH17                                                | NA                                               |
| PROM1         | -4.64610054      | 2.243684276       | 0                | PROM1                                                 | NA                                               |
| FGF14         | -4.16133602      | 1.89013512        | 0                | FGF14                                                 | NA                                               |
| CDCA7L        | -3.20491701      | 1.821544626       | 0                | CDCA7L                                                | NA                                               |
| HIST1H2AC     | -3.22817879      | 1.750763743       | 0                | HIST1H2AC                                             | NA                                               |
| IGFBP3        | -3.73725018      | 1.622755315       | 0                | IGFBP3                                                | NA                                               |
| FAM181B       | -2.44839686      | 1.447237007       | 0                | MGC33846                                              | NA                                               |
| SNCAIP        | -2.39993038      | 1.444568076       | 0                | SNCAIP                                                | NA                                               |
| ZCCHC12       | -2.49345568      | 1.400604405       | 0                | ZCCHC12                                               | NA                                               |
| B3GNT2        | -2.23637806      | 1.331500784       | 0                | B3GNT1                                                | NA                                               |
| LRRC8C        | -1.96587673      | 1.283370606       | 0.192062394      | LRRC8C                                                | NA                                               |
| FAM43A        | -1.87846026      | 1.282273341       | 0.192062394      | FAM43A                                                | NA                                               |
| MAOB          | -1.57097754      | 1.20465675        | 0.884199553      | MAOB                                                  | NA                                               |
| CACNB2        | 1.758489199      | 0.803207464       | 0.569217175      | CACNB2                                                | NA                                               |
| C6orf48       | 2.036054613      | 0.797705279       | 0.113295232      | C6orf48                                               | NA                                               |
| LRRC4C        | 1.772317163      | 0.783808549       | 0.569217175      | LRRC4C                                                | NA                                               |
| DPYD          | 1.91158004       | 0.757162176       | 0.192062394      | DPYD                                                  | NA                                               |
| ZNF702P       | 2.620344205      | 0.708615727       | 0                | ZNF702                                                | NA                                               |
| MGST1         | 1.860475221      | 0.701691591       | 0.192062394      | MGST1                                                 | NA                                               |

|          |             |             |             |          |    |
|----------|-------------|-------------|-------------|----------|----|
| IGFBP4   | 2.382813383 | 0.684181343 | 0           | IGFBP4   | NA |
| EFNB2    | 2.068676182 | 0.67820706  | 0.113295232 | EFNB2    | NA |
| FRZB     | 2.87648549  | 0.666397665 | 0           | FRZB     | NA |
| GOLSYN   | 3.318493885 | 0.652824912 | 0           | FLJ20366 | NA |
| FLJ35409 | 3.748400979 | 0.578889729 | 0           | FLJ35409 | NA |
| MRAP2    | 2.394926779 | 0.513374376 | 0           | C6orf117 | NA |
| RNF182   | 4.710640808 | 0.479628608 | 0           | RNF182   | NA |

**Differentially expressed genes between PFOvsPT, similarly regulated by Hum/Chimp FoxP2**

| <b>SYMBOL</b> | <b>PFOvsPT.d</b> | <b>PFOvsPT.FC</b> | <b>PFOvsPT.q</b> | <b>Hum/Chimp Foxp2 differentially regulated genes</b> | <b>Hum/Chimp Foxp2 similarly regulated genes</b> |
|---------------|------------------|-------------------|------------------|-------------------------------------------------------|--------------------------------------------------|
| VSTM2L        | -7.69224838      | 5.181405401       | 0                | NA                                                    | C20orf102                                        |
| CBLN4         | -2.64785393      | 1.618761792       | 0                | NA                                                    | CBLN4                                            |
| CDH12         | -3.09316342      | 1.701936008       | 0                | NA                                                    | CDH12                                            |
| FRMD3         | 2.812540314      | 0.667817242       | 0                | NA                                                    | FRMD3                                            |
| IL7           | -4.01132728      | 3.629542474       | 0                | NA                                                    | IL7                                              |
| LMO4          | -5.43330418      | 2.097623295       | 0                | NA                                                    | LMO4                                             |

|         |             |             |             |    |         |
|---------|-------------|-------------|-------------|----|---------|
| NEUROG2 | -9.53696955 | 4.355236891 | 0           | NA | NEUROG2 |
| NNAT    | -3.60534578 | 1.521518938 | 0           | NA | NNAT    |
| RFTN1   | -2.45953464 | 1.379481017 | 0           | NA | RAFTLIN |
| IGSF21  | 1.819825649 | 0.764397197 | 0.192062394 | NA | IGSF21  |
| STX3    | 1.932884244 | 0.769041276 | 0.192062394 | NA | STX3A   |
| CDH11   | -1.68075954 | 1.267706284 | 0.569217175 | NA | CDH11   |

**Differentially expressed genes between 17vs19, differentially regulated by Hum/Chimp FoxP2**

| <b>SYMBOL</b> | <b>17vs19.d</b> | <b>17vs19.FC</b> | <b>17vs19.q</b> | <b>Hum/Chimp Foxp2 differentially regulated genes</b> | <b>Hum/Chimp Foxp2 similarly regulated genes</b> |
|---------------|-----------------|------------------|-----------------|-------------------------------------------------------|--------------------------------------------------|
| RSRC1         | -3.56506296     | 1.713336184      | 0               | RSRC1                                                 | NA                                               |
| EYA1          | -3.22782472     | 1.505148939      | 0               | EYA1                                                  | NA                                               |
| H2BFS         | -3.08914357     | 1.466974572      | 0               | H2BFS                                                 | NA                                               |
| TMEM100       | -3.00072485     | 1.605912561      | 0               | TMEM100                                               | NA                                               |
| DCN           | -2.79332946     | 1.41786959       | 0               | DCN                                                   | NA                                               |
| FAM43B        | 3.968117564     | 0.63173163       | 0               | FAM43B                                                | NA                                               |
| EDNRA         | -2.51439268     | 1.506405019      | 0.154086839     | EDNRA                                                 | NA                                               |
| MAN1A1        | -2.34859792     | 1.474033488      | 0.154086839     | MAN1A1                                                | NA                                               |
| PRPH2         | 2.82645521      | 0.70562354       | 0.154086839     | PRPH                                                  | NA                                               |
| PHACTR2       | -2.19176152     | 1.276628492      | 0.52040198      | PHACTR2                                               | NA                                               |
| TMTC2         | -2.17682852     | 1.459025452      | 0.52040198      | TMTC2                                                 | NA                                               |
| HIST1H2BH     | -2.11428146     | 1.357029526      | 0.52040198      | HIST1H2BH                                             | NA                                               |
| RDX           | -2.01184849     | 1.227806594      | 0.52040198      | RDX                                                   | NA                                               |
| ISLR2         | -1.97589554     | 1.330749641      | 0.52040198      | ISLR2                                                 | NA                                               |

|       |             |             |            |       |    |
|-------|-------------|-------------|------------|-------|----|
| TIMP1 | -1.97274759 | 1.281802248 | 0.52040198 | TIMP1 | NA |
|-------|-------------|-------------|------------|-------|----|

**Differentially expressed genes between PFOvsPT, similarly regulated by Hum/Chimp FoxP2**

| <b>SYMBOL</b> | <b>17vs19.d</b> | <b>17vs19.FC</b> | <b>17vs19.q</b> | <b>Hum/Chimp Foxp2 differentially regulated genes</b> | <b>Hum/Chimp Foxp2 similarly regulated genes</b> |
|---------------|-----------------|------------------|-----------------|-------------------------------------------------------|--------------------------------------------------|
| EGR1          | -3.25867222     | 1.70147338       | 0               | NA                                                    | EGR1                                             |
| VIP           | 3.145241633     | 0.728152587      | 0               | NA                                                    | VIP                                              |
| LBH           | -3.18915584     | 1.329253496      | 0               | NA                                                    | LBH                                              |
| BOC           | -2.80684746     | 1.276563183      | 0               | NA                                                    | BOC                                              |
| GNG8          | 2.09394221      | 0.663116055      | 0.52040198      | NA                                                    | GNG8                                             |
